# Supplementary material for: Integrated Application of Transcriptomics and Metabolomics Reveals the Energy Allocation-Mediated Mechanisms of Growth-Defense Trade-Offs in Crassostrea gigas and Crassostrea angulata
Source: Frontiers journal article supplement (doi:10.3389/fmars.2021.744626), 2021-10-07
Supplement: Table_1.XLSX [file Table_1.XLSX]

## Sheet: Sheet1
#ID	Gi_Mean	An_Mean	log2FC	FDR	regulated	GO_annotation	KEGG_annotation	NR_annotation
Cg05860	2.1936	0.830258	1.21219	9.96597e-05	up	Molecular Function: ATP binding (GO:0005524);; Cellular Component: integral component of membrane (GO:0016021);; Molecular Function: ATPase activity (GO:0016887);; Molecular Function: ATPase activity, coupled to transmembrane movement of substances (GO:0042626);;	K05665|0.0e+00|crg:105318660|K05665 ATP-binding cassette, subfamily C (CFTR/MRP), member 1 [EC:7.6.2.3] | (RefSeq) multidrug resistance-associated protein 1	multidrug resistance-associated protein 1 isoform X1 [Crassostrea gigas]
Cg24311	6.44515	15.5459	-1.25861	1.29674e-14	down	Molecular Function: cytokine activity (GO:0005125);; Molecular Function: tumor necrosis factor receptor binding (GO:0005164);; Cellular Component: extracellular space (GO:0005615);; Biological Process: immune response (GO:0006955);; Cellular Component: membrane (GO:0016020);;	--	uncharacterized protein LOC109617080 [Crassostrea gigas]
Cg00866	1.44528	0.129321	1.46429	0.00425637	up	Biological Process: reproduction (GO:0000003);; Molecular Function: transcription regulatory region sequence-specific DNA binding (GO:0000976);; Molecular Function: RNA polymerase II regulatory region sequence-specific DNA binding (GO:0000977);; Molecular Function: RNA polymerase II transcription factor activity, sequence-specific DNA binding (GO:0000981);; Molecular Function: RNA polymerase II r…	K23607|5.9e-14|myd:102764049|K23607 tomoregulin-1 | (RefSeq) TMEFF1; tomoregulin-1	myb/SANT-like DNA-binding domain-containing protein 3 [Crassostrea gigas]
Cg09398	3.56748	0.148682	2.13262	1.53722e-05	up	Molecular Function: nucleic acid binding (GO:0003676);;	K09228|1.1e-26|lak:106173271|K09228 KRAB domain-containing zinc finger protein | (RefSeq) zinc finger protein 235 isoform X1	uncharacterized protein LOC117690082 isoform X3 [Crassostrea gigas]
Cg18706	1.45038	9.20804	-2.29447	2.08884e-12	down	Biological Process: reproduction (GO:0000003);; Biological Process: selenium compound metabolic process (GO:0001887);; Biological Process: platelet degranulation (GO:0002576);; Molecular Function: molecular_function (GO:0003674);; Molecular Function: binding (GO:0005488);; Cellular Component: cellular_component (GO:0005575);; Cellular Component: extracellular region (GO:0005576);; Cellular Compon…	--	selenoprotein P-like [Crassostrea virginica]
Crassostrea_gigas_newGene_8201	0.733568	3.50872	-1.72472	4.15998e-05	down	Molecular Function: nucleic acid binding (GO:0003676);; Biological Process: DNA integration (GO:0015074);;	K13356|2.4e-101|nvi:100117878|K13356 alcohol-forming fatty acyl-CoA reductase [EC:1.2.1.84] | (RefSeq) putative fatty acyl-CoA reductase CG5065 isoform X1	uncharacterized protein LOC117692001 [Crassostrea gigas]
Cg23608	4.56584	14.6106	-1.52863	2.88707e-07	down	Molecular Function: DNA binding (GO:0003677);; Molecular Function: transcription factor activity, sequence-specific DNA binding (GO:0003700);; Cellular Component: CCAAT-binding factor complex (GO:0016602);;	--	uncharacterized protein LOC105346834 [Crassostrea gigas]
Crassostrea_gigas_newGene_2917	3.13602	1.01241	1.1906	0.00704048	up	Biological Process: signal transduction (GO:0007165);; Biological Process: regulation of apoptotic process (GO:0042981);;	K02832|1.6e-37|crg:105318425|K02832 CASP2 and RIPK1 domain containing adaptor with death domain | (RefSeq) death domain-containing protein CRADD	uncharacterized protein LOC109617432 [Crassostrea gigas]
Cg24551	84.9054	34.5667	1.2025	1.78202e-08	up	Molecular Function: tumor necrosis factor receptor binding (GO:0005164);; Biological Process: immune response (GO:0006955);; Cellular Component: integral component of membrane (GO:0016021);;	K05477|2.7e-144|crg:105346255|K05477 tumor necrosis factor ligand superfamily member 14 | (RefSeq) tumor necrosis factor ligand superfamily member 10	tumor necrosis factor ligand superfamily member [Crassostrea gigas]
Cg04674	0.964231	2.2365	-1.02953	0.00751307	down	Biological Process: amino acid transport (GO:0006865);; Cellular Component: integral component of membrane (GO:0016021);; Molecular Function: transmembrane transporter activity (GO:0022857);;	K13863|1.5e-225|myi:110460398|K13863 solute carrier family 7 (cationic amino acid transporter), member 1 | (RefSeq) high affinity cationic amino acid transporter 1-like isoform X1	high affinity cationic amino acid transporter 1-like [Crassostrea gigas]
Cg29293	0.570198	2.23494	-1.79667	2.36045e-10	down	--	--	uncharacterized protein LOC117683449 [Crassostrea gigas]
Cg19069	0	2.42127	-3.21054	8.12894e-12	down	Molecular Function: ubiquitin-protein transferase activity (GO:0004842);; Molecular Function: protein binding (GO:0005515);;	--	uncharacterized protein LOC111120792 [Crassostrea virginica]
Cg23463	0.431652	1.04143	-1.06989	0.0055667	down	Molecular Function: iron ion binding (GO:0005506);; Molecular Function: oxidoreductase activity, acting on paired donors, with incorporation or reduction of molecular oxygen, reduced flavin or flavoprotein as one donor, and incorporation of one atom of oxygen (GO:0016712);; Molecular Function: heme binding (GO:0020037);;	K07422|4.2e-159|crg:105336634|K07422 cytochrome P450 family 2 subfamily U polypeptide 1 | (RefSeq) cytochrome P450 2U1	cytochrome P450 2C3 [Crassostrea gigas]
Cg12642	6.59337	2.62709	1.22206	1.3546e-07	up	Molecular Function: oxidoreductase activity (GO:0016491);;	K00306|3.5e-225|crg:105328860|K00306 sarcosine oxidase / L-pipecolate oxidase [EC:1.5.3.1 1.5.3.7] | (RefSeq) peroxisomal sarcosine oxidase	peroxisomal sarcosine oxidase [Crassostrea gigas]
Crassostrea_gigas_newGene_8706	5.87874	109.787	-2.80172	1.81186e-10	down	Cellular Component: integral component of membrane (GO:0016021);; Biological Process: transmembrane transport (GO:0055085);;	--	uncharacterized protein LOC111128609 [Crassostrea virginica]
Crassostrea_gigas_newGene_10525	1.12221	6.1309	-2.16822	1.36393e-12	down	Molecular Function: zinc ion binding (GO:0008270);; Molecular Function: N-acetylmuramoyl-L-alanine amidase activity (GO:0008745);; Biological Process: peptidoglycan catabolic process (GO:0009253);;	K01446|1.5e-44|dhe:111597008|K01446 peptidoglycan recognition protein | (RefSeq) peptidoglycan-recognition protein SC2-like	peptidoglycan-recognition protein SC2-like precursor 1 precursor [Crassostrea gigas]
Cg04891	0.430297	1.3384	-1.29807	0.00128455	down	Molecular Function: hydrolase activity, hydrolyzing O-glycosyl compounds (GO:0004553);; Biological Process: carbohydrate metabolic process (GO:0005975);; Molecular Function: carbohydrate binding (GO:0030246);;	K20697|4.5e-56|zne:110828286|K20697 gram-negative bacteria-binding protein 1 | (RefSeq) beta-1,3-glucan-binding protein 2-like	beta-1,3-glucan-binding protein-like precursor [Crassostrea gigas]
Cg09049	5.03922	0	7.26119	4.76779e-98	up	Cellular Component: integral component of membrane (GO:0016021);;	K16288|2.3e-36|myi:110465930|K16288 dual serine/threonine and tyrosine protein kinase [EC:2.7.12.1] | (RefSeq) dual serine/threonine and tyrosine protein kinase-like	uncharacterized protein LOC105347673 [Crassostrea gigas]
Cg09229	1.24658	3.83083	-1.57562	1.09259e-15	down	Biological Process: apoptotic process (GO:0006915);;	K02599|1.0e-62|spis:111337481|K02599 Notch 1 | (RefSeq) uncharacterized protein LOC111337481 isoform X1	uncharacterized protein LOC105336706 isoform X3 [Crassostrea gigas]
Cg03610	0.94837	0.132478	2.28555	1.38017e-10	up	Molecular Function: channel activity (GO:0015267);; Cellular Component: integral component of membrane (GO:0016021);;	K09866|1.5e-173|crg:105336510|K09866 aquaporin-4 | (RefSeq) aquaporin AQPAe.a	aquaporin-5 [Crassostrea gigas]
Cg05144	1.08907	0.247407	1.58048	0.000226506	up	Molecular Function: calcium ion binding (GO:0005509);;	K06051|1.5e-20|crg:105321066|K06051 delta | (RefSeq) delta-like protein 4 isoform X2	neurogenic locus notch homolog protein 1-like isoform X1 [Crassostrea gigas]
Cg07226	2.37075	7.33575	-1.49429	1.40811e-07	down	Molecular Function: monooxygenase activity (GO:0004497);; Molecular Function: iron ion binding (GO:0005506);; Molecular Function: oxidoreductase activity, acting on paired donors, with incorporation or reduction of molecular oxygen (GO:0016705);; Molecular Function: heme binding (GO:0020037);;	K17731|5.7e-237|crg:105327178|K17731 cytochrome P450 family 4 subfamily F polypeptide 22 | (RefSeq) cytochrome P450 4F22 isoform X1	cytochrome P450 4F22 isoform X1 [Crassostrea gigas]
Crassostrea_gigas_newGene_6223	6.56045	2.78254	1.68181	6.31324e-05	up	Molecular Function: calcium ion binding (GO:0005509);; Cellular Component: collagen trimer (GO:0005581);; Cellular Component: integral component of membrane (GO:0016021);;	K06238|5.3e-210|crg:105331269|K06238 collagen type VI alpha | (RefSeq) collagen alpha-6(VI) chain	collagen alpha-3(VI) chain-like [Crassostrea gigas]
Cg17151	3.06237	9.89781	-1.27664	0.00436518	down	Cellular Component: extracellular region (GO:0005576);; Molecular Function: growth factor activity (GO:0008083);;	K05496|3.5e-133|crg:105322966|K05496 bone morphogenetic protein 3 | (RefSeq) uncharacterized protein LOC105322966 isoform X2	uncharacterized protein LOC105322967 isoform X2 [Crassostrea gigas]
Cg24009	1.6301	0.658911	1.10808	0.000879885	up	Cellular Component: integral component of membrane (GO:0016021);;	--	cyclic AMP receptor-like protein A [Crassostrea gigas]
Cg23900	1.44977	4.13794	-1.49659	9.08664e-23	down	Biological Process: signal transduction (GO:0007165);;	K08843|6.2e-12|nve:116609930|K08843 leucine-rich repeat kinase 1 [EC:2.7.11.1] | (RefSeq) leucine-rich repeat serine/threonine-protein kinase 2-like isoform X1	uncharacterized protein LOC105317996 isoform X2 [Crassostrea gigas]
Crassostrea_gigas_newGene_14045	0.0620362	2.97303	-2.03565	4.04976e-05	down	--	--	uncharacterized protein LOC111135076 isoform X2 [Crassostrea virginica]
Cg16102	1.6974	4.81731	-1.48585	3.87938e-22	down	--	--	uncharacterized protein LOC105320306 [Crassostrea gigas]
Cg17825	8.01172	0.108232	3.61016	1.37793e-15	up	Biological Process: carbohydrate metabolic process (GO:0005975);; Biological Process: protein glycosylation (GO:0006486);; Molecular Function: galactoside 2-alpha-L-fucosyltransferase activity (GO:0008107);; Cellular Component: Golgi cisterna membrane (GO:0032580);;	K00718|5.9e-189|crg:109618713|K00718 galactoside 2-L-fucosyltransferase 1/2 [EC:2.4.1.69] | (RefSeq) galactoside 2-alpha-L-fucosyltransferase 2-like	galactoside 2-alpha-L-fucosyltransferase 2-like [Crassostrea gigas]
Cg06737	11.3896	42.6902	-1.85778	8.30203e-25	down	Cellular Component: integral component of membrane (GO:0016021);;	--	skeletal aspartic acid-rich protein 2 [Crassostrea gigas]
Cg11938	0.745575	3.65769	-1.67485	0.000140951	down	Cellular Component: integral component of membrane (GO:0016021);;	--	uncharacterized protein LOC105346704 [Crassostrea gigas]
Crassostrea_gigas_newGene_3484	3.16094	1.00815	1.25136	0.00311389	up	Molecular Function: zinc ion binding (GO:0008270);;	K11997|8.3e-146|crg:105323897|K11997 tripartite motif-containing protein 2/3 | (RefSeq) uncharacterized protein LOC105323897	uncharacterized protein LOC117682216 [Crassostrea gigas]
Crassostrea_gigas_newGene_8310	87.3583	0.604448	5.88005	7.37415e-69	up	Molecular Function: symporter activity (GO:0015293);; Cellular Component: integral component of membrane (GO:0016021);; Molecular Function: hydrolase activity (GO:0016787);;	--	protein usf isoform X2 [Crassostrea gigas]
Cg09766	333.627	66.9491	2.25314	2.29535e-91	up	Molecular Function: protein tyrosine kinase activity (GO:0004713);; Molecular Function: ATP binding (GO:0005524);; Biological Process: ATP synthesis coupled proton transport (GO:0015986);; Molecular Function: proton-transporting ATP synthase activity, rotational mechanism (GO:0046933);;	K02137|7.1e-111|crg:105323833|K02137 F-type H+-transporting ATPase subunit O | (RefSeq) ATP synthase subunit O, mitochondrial	ATP synthase subunit O, mitochondrial [Crassostrea gigas]
Cg24796	14.9981	33.9992	-1.15111	1.0601e-08	down	Biological Process: cell adhesion (GO:0007155);; Cellular Component: integral component of membrane (GO:0016021);; Biological Process: tissue regeneration (GO:0042246);;	--	uncharacterized protein LOC117690298 isoform X2 [Crassostrea gigas]
Cg23742	3.26561	15.2052	-2.13636	5.12287e-27	down	--	--	uncharacterized protein LOC105324798 isoform X7 [Crassostrea gigas]
Cg09863	1.70837	0.153025	2.27118	7.13661e-07	up	Molecular Function: nucleic acid binding (GO:0003676);; Molecular Function: zinc ion binding (GO:0008270);; Biological Process: DNA integration (GO:0015074);;	K00432|1.0e-136|spu:105437350|K00432 glutathione peroxidase [EC:1.11.1.9] | (RefSeq) glutathione peroxidase 7-like	uncharacterized protein K02A2.6-like [Crassostrea gigas]
Cg13286	14.4661	6.359	1.14704	9.31799e-43	up	Cellular Component: cellular_component (GO:0005575);; Cellular Component: cell (GO:0005623);; Cellular Component: plasma membrane (GO:0005886);; Biological Process: organic acid metabolic process (GO:0006082);; Biological Process: peptide metabolic process (GO:0006518);; Biological Process: icosanoid metabolic process (GO:0006690);; Biological Process: leukotriene metabolic process (GO:0006691);;…	K00681|0.0e+00|crg:105337558|K00681 gamma-glutamyltranspeptidase / glutathione hydrolase [EC:2.3.2.2 3.4.19.13] | (RefSeq) gamma-glutamyltranspeptidase 1 isoform X2	glutathione hydrolase 1 proenzyme isoform X1 [Crassostrea gigas]
Cg27135	0.289963	2.36815	-1.87537	7.68984e-05	down	--	K17447|2.0e-17|pbi:103061599|K17447 SHC-transforming protein 2 | (RefSeq) SHC2; LOW QUALITY PROTEIN: SHC-transforming protein 2	outer dense fiber protein 3-like isoform X1 [Crassostrea virginica]
Cg22516	0.251307	24.9218	-1.53249	0.00215742	down	Molecular Function: calcium ion binding (GO:0005509);;	K17341|3.3e-17|myi:110449963|K17341 hemicentin | (RefSeq) hemicentin-1-like	hemicentin-1 isoform X1 [Crassostrea gigas]
Cg14256	0.592226	2.27177	-1.79991	2.02303e-13	down	Cellular Component: integral component of membrane (GO:0016021);;	--	--
Cg01560	1.485	0.611847	1.09087	0.00094268	up	--	--	protein RRNAD1 [Crassostrea gigas]
Cg03814	51.7246	14.7879	1.71151	9.46175e-22	up	--	--	interferon alpha-inducible protein 27-like protein 2B isoform X3 [Crassostrea gigas]
Cg24183	0	8.29091	-2.81931	3.77836e-09	down	Biological Process: response to hypoxia (GO:0001666);; Biological Process: regulation of protein phosphorylation (GO:0001932);; Biological Process: positive regulation of protein phosphorylation (GO:0001934);; Biological Process: immune system process (GO:0002376);; Molecular Function: molecular_function (GO:0003674);; Molecular Function: receptor binding (GO:0005102);; Molecular Function: bindin…	K10104|3.1e-52|crg:105322529|K10104 ficolin | (RefSeq) microfibril-associated glycoprotein 4	microfibril-associated glycoprotein 4-like [Crassostrea gigas]
Crassostrea_gigas_newGene_2541	0.210741	1.95025	-1.71832	0.000533521	down	--	--	uncharacterized protein LOC105331205 [Crassostrea gigas]
Cg26360	0.154424	1.65315	-2.10398	6.78101e-06	down	Biological Process: regulation of cytokine production (GO:0001817);; Molecular Function: tumor necrosis factor receptor binding (GO:0005164);; Biological Process: Toll signaling pathway (GO:0008063);; Molecular Function: zinc ion binding (GO:0008270);; Biological Process: negative regulation of NF-kappaB transcription factor activity (GO:0032088);; Biological Process: tumor necrosis factor-mediat…	K03174|4.8e-106|ola:101161601|K03174 TNF receptor-associated factor 3 | (RefSeq) traf3; TNF receptor-associated factor 3	TNF receptor-associated factor 3 [Crassostrea gigas]
Cg14109	1.65177	31.018	-3.71734	2.41954e-36	down	Molecular Function: zinc ion binding (GO:0008270);;	K19930|9.4e-31|lhu:105679516|K19930 SRC kinase signaling inhibitor 1 | (RefSeq) LOW QUALITY PROTEIN: uncharacterized protein LOC105679516	uncharacterized protein LOC117684148 [Crassostrea gigas]
Cg12698	0.368804	3.03963	-1.73142	0.000459482	down	Molecular Function: catalytic activity (GO:0003824);;	K01904|9.5e-13|acep:105622852|K01904 4-coumarate--CoA ligase [EC:6.2.1.12] | (RefSeq) 4-coumarate--CoA ligase 1-like	4-coumarate--CoA ligase 4 [Crassostrea gigas]
Crassostrea_gigas_newGene_14018	3.12076	8.64753	-1.18179	0.0046843	down	Molecular Function: RNA binding (GO:0003723);; Molecular Function: zinc ion binding (GO:0008270);;	K11997|6.1e-89|crg:105347509|K11997 tripartite motif-containing protein 2/3 | (RefSeq) tripartite motif-containing protein 45	tripartite motif-containing protein 45-like [Crassostrea gigas]
Cg19996	1.6311	6.05961	-1.685	8.71314e-08	down	Cellular Component: mitochondrial proton-transporting ATP synthase complex, coupling factor F(o) (GO:0000276);; Molecular Function: molecular_function (GO:0003674);; Molecular Function: transporter activity (GO:0005215);; Cellular Component: cellular_component (GO:0005575);; Cellular Component: intracellular (GO:0005622);; Cellular Component: cell (GO:0005623);; Cellular Component: cytoplasm (GO:…	--	AP-4 complex accessory subunit Tepsin isoform X1 [Crassostrea gigas]
Cg00292	1.79209	12.5118	-1.37328	0.00817406	down	Cellular Component: integral component of membrane (GO:0016021);;	K22244|3.8e-09|crg:105344906|K22244 regenerating islet-derived protein 4 | (RefSeq) perlucin-like	perlucin-like protein [Crassostrea gigas]
Crassostrea_gigas_newGene_267	1.09941	4.21526	-1.36926	0.00348792	down	Molecular Function: nucleic acid binding (GO:0003676);; Biological Process: DNA integration (GO:0015074);;	K23593|1.5e-178|cpic:101941368|K23593 alpha-2-macroglobulin-like protein | (RefSeq) uncharacterized LOC101941368	uncharacterized protein LOC117684040 isoform X2 [Crassostrea gigas]
Cg15404	0.346408	1.68474	-1.77038	1.14176e-05	down	Cellular Component: integral component of membrane (GO:0016021);;	--	uncharacterized protein LOC105331877 [Crassostrea gigas]
Cg17094	2.53875	0.118471	2.69706	3.72845e-09	up	Cellular Component: integral component of membrane (GO:0016021);;	K22144|5.7e-198|crg:105332347|K22144 cell surface hyaluronidase [EC:3.2.1.35] | (RefSeq) cell migration-inducing and hyaluronan-binding protein	cell surface hyaluronidase [Crassostrea gigas]
Cg12160	1.7922	0.0243065	2.97893	3.46835e-10	up	--	--	uncharacterized protein LOC109618795 isoform X1 [Crassostrea gigas]
Cg13420	95.7582	17.944	1.49292	0.0027373	up	Cellular Component: extracellular region (GO:0005576);;	K17310|2.3e-70|crg:105332146|K17310 serum amyloid A protein | (RefSeq) serum amyloid A-5 protein-like	serum amyloid A-5 protein isoform X1 [Crassostrea gigas]
Cg11730	8.36998	3.18166	1.30307	6.39346e-11	up	Molecular Function: calcium channel activity (GO:0005262);; Cellular Component: integral component of membrane (GO:0016021);;	K04966|1.2e-18|pcan:112559947|K04966 transient receptor potential cation channel subfamily C member 3 | (RefSeq) LOW QUALITY PROTEIN: short transient receptor potential channel 3-like	short transient receptor potential channel 3-like [Crassostrea gigas]
Crassostrea_gigas_newGene_10882	0.0054035	0.826999	-3.62788	1.6869e-16	down	--	--	uncharacterized protein LOC117691378 [Crassostrea gigas]
Crassostrea_gigas_newGene_14682	1.78324	0.679314	1.12685	0.00234071	up	Molecular Function: zinc ion binding (GO:0008270);; Molecular Function: kinase activity (GO:0016301);;	K11997|3.1e-79|crg:109619606|K11997 tripartite motif-containing protein 2/3 | (RefSeq) uncharacterized protein LOC109619606	uncharacterized protein LOC109620626 [Crassostrea gigas]
Cg11712	0.573312	2.17552	-1.448	0.000782581	down	--	K23284|3.9e-96|crg:105330562|K23284 C1q-related factor | (RefSeq) complement C1q subcomponent subunit B-like isoform X1	complement C1q tumor necrosis factor-related protein 3-like isoform X2 [Crassostrea gigas]
Cg19945	0.994473	5.9596	-2.18178	3.44986e-10	down	Molecular Function: G-protein coupled receptor activity (GO:0004930);; Cellular Component: integral component of membrane (GO:0016021);;	K04263|4.8e-170|crg:105345486|K04263 prostacyclin receptor | (RefSeq) prostaglandin E2 receptor EP4 subtype	prostaglandin E2 receptor EP4 subtype [Crassostrea gigas]
Crassostrea_gigas_newGene_1705	4.42621	0.17156	2.91835	1.15155e-10	up	Molecular Function: DNA binding (GO:0003677);; Cellular Component: nucleus (GO:0005634);;	--	uncharacterized protein LOC111137873 [Crassostrea virginica]
Crassostrea_gigas_newGene_11177	1.75717	0.182003	2.37016	6.02709e-08	up	--	--	uncharacterized protein LOC105342935 [Crassostrea gigas]
Cg07457	2.00364	16.5176	-1.64718	0.00105559	down	--	K23440|2.9e-25|pdam:113668108|K23440 serine protease 56 [EC:3.4.21.-] | (RefSeq) phenoloxidase-activating factor 1-like	pancreatic secretory granule membrane major glycoprotein GP2-like [Crassostrea virginica]
Cg30651	0.386752	0.0864737	1.36917	0.00574519	up	--	--	uncharacterized protein LOC117687520 [Crassostrea gigas]
Crassostrea_gigas_newGene_14625	5.64399	0	4.6805	3.83705e-28	up	--	--	UPF0538 protein C2orf76 homolog isoform X2 [Crassostrea gigas]
Cg21896	22.062	6.12856	1.77596	3.02604e-37	up	Molecular Function: methyltransferase activity (GO:0008168);;	K06560|4.7e-13|sko:100372598|K06560 mannose receptor, C type | (RefSeq) uncharacterized LOC100372598	N-methyltransferase dtpB isoform X2 [Crassostrea gigas]
Cg11731	44.9736	0	8.15634	5.73413e-126	up	--	K23284|5.2e-82|crg:105327022|K23284 C1q-related factor | (RefSeq) complement C1q tumor necrosis factor-related protein 3-like isoform X1	complement C1q tumor necrosis factor-related protein 3-like [Crassostrea gigas]
Cg03567	42.7576	0.0044825	9.67939	5.26496e-229	up	--	--	uncharacterized protein LOC117692946 [Crassostrea gigas]
Cg27561	7.66395	1.25914	1.9674	2.05054e-06	up	--	--	ankyrin repeat domain-containing protein 36C isoform X2 [Crassostrea gigas]
Cg17965	1.39158	2.84811	-1.00541	5.32464e-06	down	Molecular Function: zinc ion binding (GO:0008270);;	K11997|4.7e-34|crg:105322491|K11997 tripartite motif-containing protein 2/3 | (RefSeq) B-box type zinc finger protein ncl-1	uncharacterized protein LOC105341111 [Crassostrea gigas]
Cg20017	6.27828	0.829567	2.49472	6.3574e-15	up	Molecular Function: phosphatidylinositol binding (GO:0035091);;	--	HCLS1-binding protein 3 isoform X1 [Crassostrea gigas]
Crassostrea_gigas_newGene_6186	1.65602	0.267733	1.98623	1.45326e-06	up	Molecular Function: zinc ion binding (GO:0008270);;	K11997|5.1e-225|crg:105323897|K11997 tripartite motif-containing protein 2/3 | (RefSeq) uncharacterized protein LOC105323897	uncharacterized protein LOC117687514 [Crassostrea gigas]
Cg17020	105.498	49.1014	1.02321	2.76536e-07	up	Biological Process: fatty acid biosynthetic process (GO:0006633);; Cellular Component: integral component of membrane (GO:0016021);; Molecular Function: oxidoreductase activity, acting on paired donors, with oxidation of a pair of donors resulting in the reduction of molecular oxygen to two molecules of water (GO:0016717);;	K00507|2.4e-187|crg:105335417|K00507 stearoyl-CoA desaturase (Delta-9 desaturase) [EC:1.14.19.1] | (RefSeq) acyl-CoA desaturase	acyl-CoA desaturase isoform X2 [Crassostrea gigas]
Cg12112	4.46261	1.67404	1.21746	0.00019128	up	Molecular Function: GTP binding (GO:0005525);;	K09228|4.3e-19|mgp:104914585|K09228 KRAB domain-containing zinc finger protein | (RefSeq) uncharacterized protein LOC104914585	inner centromere protein A isoform X2 [Crassostrea gigas]
Cg25658	0.120929	1.97917	-2.1008	1.68215e-05	down	Molecular Function: zinc ion binding (GO:0008270);;	K12026|2.1e-215|crg:109618359|K12026 tripartite motif-containing protein 56 [EC:2.3.2.27] | (RefSeq) uncharacterized protein LOC109618359	uncharacterized protein LOC117690202 [Crassostrea gigas]
Cg13502	17.0076	38.0976	-1.1495	1.56397e-10	down	Molecular Function: transmembrane signaling receptor activity (GO:0004888);; Molecular Function: extracellular ligand-gated ion channel activity (GO:0005230);; Cellular Component: integral component of membrane (GO:0016021);;	K05312|2.1e-242|crg:105321010|K05312 nicotinic acetylcholine receptor, invertebrate | (RefSeq) neuronal acetylcholine receptor subunit beta-2-like	neuronal acetylcholine receptor subunit beta-2-like [Crassostrea gigas]
Cg27339	9.85911	2.93264	1.54578	4.75935e-08	up	Molecular Function: O-methyltransferase activity (GO:0008171);; Biological Process: methylation (GO:0032259);;	K00545|1.5e-07|oaa:100092373|K00545 catechol O-methyltransferase [EC:2.1.1.6] | (RefSeq) catechol O-methyltransferase A	probable caffeoyl-CoA O-methyltransferase 1 [Crassostrea gigas]
Cg10882	5.22858	0.806225	1.37032	0.0083696	up	Molecular Function: molecular_function (GO:0003674);; Molecular Function: structural molecule activity (GO:0005198);; Molecular Function: extracellular matrix structural constituent (GO:0005201);; Cellular Component: cellular_component (GO:0005575);; Cellular Component: extracellular region (GO:0005576);; Molecular Function: extracellular matrix constituent conferring elasticity (GO:0030023);; Mo…	K23284|3.7e-60|crg:105343493|K23284 C1q-related factor | (RefSeq) complement C1q tumor necrosis factor-related protein 2-like	heavy metal-binding protein HIP-like [Crassostrea gigas]
Cg27787	1.3589	0.16901	2.41577	3.13357e-11	up	Molecular Function: molecular_function (GO:0003674);; Molecular Function: binding (GO:0005488);; Molecular Function: macromolecular complex binding (GO:0044877);;	--	uncharacterized protein LOC105346339 [Crassostrea gigas]
Cg11291	3.68842	1.12162	1.42989	8.23483e-05	up	Molecular Function: zinc ion binding (GO:0008270);; Biological Process: methionine biosynthetic process (GO:0009086);; Biological Process: methylation (GO:0032259);; Molecular Function: betaine-homocysteine S-methyltransferase activity (GO:0047150);;	K00544|1.8e-199|crg:105329125|K00544 betaine-homocysteine S-methyltransferase [EC:2.1.1.5] | (RefSeq) S-methylmethionine--homocysteine S-methyltransferase BHMT2	S-methylmethionine--homocysteine S-methyltransferase BHMT2 [Crassostrea gigas]
Crassostrea_gigas_newGene_14050	2.86105	0.741015	1.47115	0.000595313	up	--	K17834|8.0e-07|xtr:100488048|K17834 cyclic GMP-AMP synthase [EC:2.7.7.86] | (RefSeq) cgas; cyclic GMP-AMP synthase	uncharacterized protein LOC117686455 [Crassostrea gigas]
Crassostrea_gigas_newGene_4121	1.20498	0.0680578	3.12133	2.09624e-15	up	Molecular Function: RNA-directed DNA polymerase activity (GO:0003964);; Cellular Component: integral component of membrane (GO:0016021);;	K22614|5.5e-45|spis:111346170|K22614 NLR family CARD domain-containing protein 3 | (RefSeq) uncharacterized protein LOC111346170	RNA-directed DNA polymerase from transposon BS [Mizuhopecten yessoensis]
Cg10518	6.47461	0.336117	2.56436	4.399e-08	up	Molecular Function: zinc ion binding (GO:0008270);;	K11997|6.6e-252|crg:105330300|K11997 tripartite motif-containing protein 2/3 | (RefSeq) protein PML	uncharacterized protein LOC105330300 [Crassostrea gigas]
Crassostrea_gigas_newGene_828	0.51298	2.21512	-1.23701	0.0076506	down	Molecular Function: nucleic acid binding (GO:0003676);; Biological Process: DNA integration (GO:0015074);;	K06065|1.4e-41|xma:102225078|K06065 nuclear receptor co-repressor 2 | (RefSeq) uncharacterized protein LOC102225078	unnamed protein product [Mytilus coruscus]
Cg24577	8.84978	26.5162	-1.48134	1.32196e-08	down	Biological Process: cellular glucose homeostasis (GO:0001678);; Molecular Function: hexokinase activity (GO:0004396);; Molecular Function: ATP binding (GO:0005524);; Molecular Function: glucose binding (GO:0005536);; Biological Process: glycolytic process (GO:0006096);;	K00844|2.0e-267|crg:105317783|K00844 hexokinase [EC:2.7.1.1] | (RefSeq) hexokinase-1	hexokinase-1 [Crassostrea gigas]
Cg24912	44.9541	10.2141	2.02586	3.32371e-29	up	--	K05719|3.9e-312|crg:105341060|K05719 integrin beta 1 | (RefSeq) uncharacterized protein LOC105341060	uncharacterized protein LOC105341060 [Crassostrea gigas]
Cg00036	3.80857	1.58642	1.18934	3.73652e-11	up	Molecular Function: zinc ion binding (GO:0008270);;	K11997|0.0e+00|crg:109619606|K11997 tripartite motif-containing protein 2/3 | (RefSeq) uncharacterized protein LOC109619606	uncharacterized protein LOC109618176 [Crassostrea gigas]
Cg27606	2.12311	19.7922	-1.60189	0.001657	down	Biological Process: reproduction (GO:0000003);; Biological Process: urogenital system development (GO:0001655);; Biological Process: morphogenesis of a branching structure (GO:0001763);; Molecular Function: fibronectin binding (GO:0001968);; Biological Process: morphogenesis of an epithelium (GO:0002009);; Biological Process: developmental process involved in reproduction (GO:0003006);; Biologica…	K10104|8.0e-79|crg:105329191|K10104 ficolin | (RefSeq) ryncolin-4 isoform X2	fibroleukin isoform X2 [Crassostrea gigas]
Cg19118	0.113534	0.884851	-1.86081	7.97761e-05	down	Molecular Function: nucleic acid binding (GO:0003676);; Molecular Function: DNA binding (GO:0003677);; Molecular Function: metal ion binding (GO:0046872);;	K20032|3.1e-13|hmg:100213942|K20032 palmitoyltransferase ZDHHC13/17 [EC:2.3.1.225] | (RefSeq) uncharacterized LOC100213942	uncharacterized protein LOC105345124 [Crassostrea gigas]
Cg00022	9.50099	2.16473	1.98934	4.14094e-21	up	Molecular Function: zinc ion binding (GO:0008270);;	K11997|0.0e+00|crg:109619606|K11997 tripartite motif-containing protein 2/3 | (RefSeq) uncharacterized protein LOC109619606	uncharacterized protein LOC105323903 [Crassostrea gigas]
Cg09194	2.69614	1.08771	1.18275	3.92709e-06	up	--	--	uncharacterized protein LOC117691257 [Crassostrea gigas]
Cg12591	1.52761	0.15184	2.15939	3.13756e-06	up	--	K22614|3.6e-11|spis:111341738|K22614 NLR family CARD domain-containing protein 3 | (RefSeq) protein NLRC3-like isoform X1	uncharacterized protein LOC105344452 [Crassostrea gigas]
Crassostrea_gigas_newGene_5571	4.08878	0.621527	2.38859	6.06065e-18	up	Molecular Function: ATP binding (GO:0005524);;	--	uncharacterized protein LOC117681892 [Crassostrea gigas]
Cg18769	0.0550293	0.706878	-1.39808	0.00688942	down	--	K14530|2.5e-45|hmg:105849126|K14530 ribonucleases P/MRP protein subunit RPP40 [EC:3.1.26.5] | (RefSeq) RNA-directed DNA polymerase from mobile element jockey-like	uncharacterized protein LOC105447398 [Strongylocentrotus purpuratus]
Cg03837	0.866935	11.2786	-3.53722	5.24068e-77	down	Molecular Function: monooxygenase activity (GO:0004497);; Molecular Function: iron ion binding (GO:0005506);; Molecular Function: oxidoreductase activity, acting on paired donors, with incorporation or reduction of molecular oxygen (GO:0016705);; Molecular Function: heme binding (GO:0020037);;	K07426|5.5e-287|crg:105332013|K07426 cytochrome P450 family 4 subfamily B polypeptide 1 [EC:1.14.14.1] | (RefSeq) cytochrome P450 4A25	cytochrome P450 4A2 [Crassostrea gigas]
Cg05083	7.27455	2.44204	1.45159	6.34632e-11	up	Molecular Function: ATP binding (GO:0005524);; Cellular Component: cytoplasm (GO:0005737);; Cellular Component: cytoskeleton (GO:0005856);;	K05692|6.0e-177|myi:110459362|K05692 actin beta/gamma 1 | (RefSeq) actin, adductor muscle	actin-5 isoform X1 [Crassostrea gigas]
Cg10564	0.405756	0.0396656	1.76151	0.000456011	up	Molecular Function: nucleic acid binding (GO:0003676);; Molecular Function: aspartic-type endopeptidase activity (GO:0004190);; Molecular Function: zinc ion binding (GO:0008270);; Biological Process: DNA integration (GO:0015074);;	K06065|2.2e-180|xma:102225078|K06065 nuclear receptor co-repressor 2 | (RefSeq) uncharacterized protein LOC102225078	uncharacterized protein LOC105318033 [Crassostrea gigas]
Cg22518	0.20053	4.35798	-3.82968	7.70437e-37	down	Molecular Function: calcium ion binding (GO:0005509);;	K17341|1.1e-29|myi:110461058|K17341 hemicentin | (RefSeq) hemicentin-1-like	hemicentin-1 isoform X1 [Crassostrea gigas]
Crassostrea_gigas_newGene_16664	0.226136	7.20997	-1.80389	0.000325695	down	--	--	putative uncharacterized protein DDB_G0286901 [Crassostrea gigas]
Cg18454	11.5451	23.5013	-1.03204	3.75697e-14	down	Molecular Function: catalytic activity (GO:0003824);; Biological Process: polyamine biosynthetic process (GO:0006596);; Cellular Component: integral component of membrane (GO:0016021);;	--	uncharacterized protein LOC105318612 [Crassostrea gigas]
Cg07773	1.40155	4.56776	-1.47688	2.25469e-05	down	Molecular Function: phenylalanine 4-monooxygenase activity (GO:0004505);; Molecular Function: iron ion binding (GO:0005506);; Biological Process: L-phenylalanine catabolic process (GO:0006559);;	K00500|7.6e-122|crg:105343048|K00500 phenylalanine-4-hydroxylase [EC:1.14.16.1] | (RefSeq) protein henna isoform X1	phenylalanine-4-hydroxylase-like isoform X1 [Crassostrea gigas]
Cg17127	39.113	101.875	-1.33769	1.90894e-09	down	--	--	uncharacterized protein LOC105319198 [Crassostrea gigas]
Cg09713	0.89171	3.12433	-1.31614	0.00412345	down	Molecular Function: GTP binding (GO:0005525);;	K09228|1.7e-25|mgp:104914585|K09228 KRAB domain-containing zinc finger protein | (RefSeq) uncharacterized protein LOC104914585	GTPase IMAP family member 9-like isoform X1 [Crassostrea gigas]
Crassostrea_gigas_newGene_15336	8.90947	2.83082	1.45912	5.21066e-07	up	Biological Process: nucleoside triphosphate catabolic process (GO:0009143);; Molecular Function: nucleoside-triphosphate diphosphatase activity (GO:0047429);;	K16904|6.0e-77|crg:105341436|K16904 dCTP diphosphatase [EC:3.6.1.12] | (RefSeq) dCTP pyrophosphatase 1-like	dCTP pyrophosphatase 1-like [Crassostrea gigas]
Cg02935	1.94166	0.651895	1.1977	0.00548928	up	--	K23222|3.7e-69|crg:105343509|K23222 nuclease HARBI1 [EC:3.1.-.-] | (RefSeq) putative nuclease HARBI1	putative nuclease HARBI1 [Crassostrea gigas]
Cg17112	1.95763	0.828822	1.05476	0.00195407	up	Cellular Component: Golgi membrane (GO:0000139);; Biological Process: protein glycosylation (GO:0006486);; Cellular Component: integral component of membrane (GO:0016021);; Molecular Function: transferase activity, transferring glycosyl groups (GO:0016757);;	K03877|5.2e-186|crg:105317388|K03877 beta-1,3-galactosyltransferase 5 [EC:2.4.1.-] | (RefSeq) beta-1,3-galactosyltransferase 5-like isoform X1	beta-1,3-galactosyltransferase 5-like [Crassostrea gigas]
Cg14080	36.1368	12.3529	1.27202	0.000774191	up	Biological Process: DNA integration (GO:0015074);; Biological Process: regulation of apoptotic process (GO:0042981);;	K06065|3.6e-266|xma:102225078|K06065 nuclear receptor co-repressor 2 | (RefSeq) uncharacterized protein LOC102225078	uncharacterized protein LOC117681325 isoform X2 [Crassostrea gigas]
Cg13960	3.4883	1.40985	1.20583	5.56947e-08	up	--	K23637|9.8e-12|sko:102809083|K23637 WAP four-disulfide core domain protein 3 | (RefSeq) uncharacterized LOC102809083	uncharacterized protein LOC109617207 isoform X3 [Crassostrea gigas]
Crassostrea_gigas_newGene_1268	4.4101	8.58779	-1.00055	2.20024e-10	down	Molecular Function: zinc ion binding (GO:0008270);;	K11997|7.3e-195|crg:105332950|K11997 tripartite motif-containing protein 2/3 | (RefSeq) tripartite motif-containing protein 55-like isoform X2	uncharacterized protein LOC105336573 [Crassostrea gigas]
Cg22466	0.0663167	4.8271	-1.92539	0.000107016	down	--	--	uncharacterized protein LOC105340025 [Crassostrea gigas]
Cg25849	2.53	5.42541	-1.06152	1.1075e-06	down	Molecular Function: nucleic acid binding (GO:0003676);; Molecular Function: helicase activity (GO:0004386);; Molecular Function: ATP binding (GO:0005524);; Molecular Function: zinc ion binding (GO:0008270);;	K15711|0.0e+00|crg:105349024|K15711 SWI/SNF-related matrix-associated actin-dependent regulator of chromatin subfamily A3 [EC:3.6.4.- 2.3.2.27] | (RefSeq) helicase-like transcription factor isoform X1	helicase-like transcription factor isoform X1 [Crassostrea gigas]
Cg07900	3.73341	9.69702	-1.32001	1.07559e-08	down	--	K16060|1.5e-80|crg:105320825|K16060 baculoviral IAP repeat-containing protein 2/3 | (RefSeq) baculoviral IAP repeat-containing protein 7	uncharacterized protein LOC117686351 [Crassostrea gigas]
Cg12617	1.42309	0.504722	1.4176	1.01074e-16	up	Molecular Function: G-protein coupled receptor activity (GO:0004930);; Cellular Component: integral component of membrane (GO:0016021);;	K04307|1.9e-95|lgi:LOTGIDRAFT_140100|K04307 relaxin family peptide receptor 2 | (RefSeq) hypothetical protein	uncharacterized protein LOC105319276 [Crassostrea gigas]
Cg01516	1.49649	0.247828	2.10151	4.09366e-09	up	Molecular Function: zinc ion binding (GO:0008270);;	K12021|2.2e-16|crg:105344696|K12021 tripartite motif-containing protein 45 | (RefSeq) tripartite motif-containing protein 45-like	uncharacterized protein LOC117686808 [Crassostrea gigas]
Cg18879	1.07339	2.28832	-1.03641	5.05251e-05	down	Molecular Function: chitinase activity (GO:0004568);; Cellular Component: extracellular region (GO:0005576);; Biological Process: carbohydrate metabolic process (GO:0005975);; Molecular Function: chitin binding (GO:0008061);;	K01183|0.0e+00|crg:105331571|K01183 chitinase [EC:3.2.1.14] | (RefSeq) chitotriosidase-1-like precursor	chitotriosidase-1-like precursor [Crassostrea gigas]
Cg01673	0	2.3072	-4.59509	1.89806e-26	down	--	--	uncharacterized protein LOC105327327 isoform X2 [Crassostrea gigas]
Cg29968	22.0408	8.69203	1.14507	0.000729645	up	Cellular Component: integral component of membrane (GO:0016021);;	--	uncharacterized protein LOC105345807 [Crassostrea gigas]
Cg12248	0.697988	2.53141	-1.6369	3.72714e-07	down	--	--	neurogenic locus notch homolog protein 1 [Crassostrea gigas]
Cg26590	2.32088	5.01619	-1.09725	1.10231e-09	down	Molecular Function: copper ion binding (GO:0005507);; Molecular Function: oxidoreductase activity (GO:0016491);;	K00423|2.3e-83|adf:107352115|K00423 L-ascorbate oxidase [EC:1.10.3.3] | (RefSeq) L-ascorbate oxidase-like	oxidoreductase OpS5 isoform X2 [Crassostrea gigas]
Cg07018	6.56996	0.385739	2.18664	7.58034e-06	up	Molecular Function: extracellular ligand-gated ion channel activity (GO:0005230);; Molecular Function: ATP binding (GO:0005524);; Cellular Component: integral component of membrane (GO:0016021);; Molecular Function: ligase activity (GO:0016874);; Molecular Function: metal ion binding (GO:0046872);;	K05186|2.9e-72|myi:110443131|K05186 gamma-aminobutyric acid receptor subunit gamma | (RefSeq) gamma-aminobutyric acid receptor subunit gamma-2-like isoform X1	uncharacterized protein LOC105345598 [Crassostrea gigas]
Cg27616	2.53749	0.0408097	2.62141	5.67502e-08	up	--	--	uncharacterized protein LOC105338724 isoform X1 [Crassostrea gigas]
Cg08717	1.42905	0.646437	1.01768	0.000284437	up	Molecular Function: calcium ion binding (GO:0005509);; Biological Process: integrin-mediated signaling pathway (GO:0007229);;	--	uncharacterized protein LOC105348139 isoform X4 [Crassostrea gigas]
Crassostrea_gigas_newGene_8967	4.27804	0.260444	1.70481	0.000739073	up	Molecular Function: metal ion binding (GO:0046872);;	--	uncharacterized protein LOC105320504 [Crassostrea gigas]
Cg23622	1.01228	0.278961	1.42215	0.000611157	up	Cellular Component: integral component of membrane (GO:0016021);; Molecular Function: transmembrane transporter activity (GO:0022857);;	K08181|1.1e-224|crg:105332431|K08181 MFS transporter, MCT family, solute carrier family 16 (monocarboxylic acid transporters), member 4 | (RefSeq) monocarboxylate transporter 2-like	monocarboxylate transporter 2 [Crassostrea gigas]
Cg00690	1.4517	0.295049	1.71643	4.53074e-05	up	--	K01518|3.8e-09|aplc:110987942|K01518 bis(5'-nucleosidyl)-tetraphosphatase [EC:3.6.1.17] | (RefSeq) uncharacterized protein LOC110987942 isoform X1	uncharacterized protein LOC105347339 [Crassostrea gigas]
Crassostrea_gigas_newGene_2126	11.5922	1.74926	1.88705	6.92157e-06	up	Molecular Function: zinc ion binding (GO:0008270);;	K11997|7.8e-39|crg:109619606|K11997 tripartite motif-containing protein 2/3 | (RefSeq) uncharacterized protein LOC109619606	uncharacterized protein LOC105323903 [Crassostrea gigas]
Crassostrea_gigas_newGene_4729	7.99311	0.265244	2.21714	6.38924e-06	up	Molecular Function: cysteine-type endopeptidase inhibitor activity (GO:0004869);;	K13907|1.9e-54|crg:105336952|K13907 cystatin-A/B | (RefSeq) cystatin-B	cystatin-B [Crassostrea gigas]
Cg01089	1.93077	4.26186	-1.02995	0.00148212	down	Molecular Function: scavenger receptor activity (GO:0005044);;	K13297|1.9e-40|crg:105322070|K13297 receptor-type tyrosine-protein phosphatase T [EC:3.1.3.48] | (RefSeq) uncharacterized protein LOC105322070	multiple epidermal growth factor-like domains protein 6 isoform X4 [Crassostrea gigas]
Cg20065	3.15716	10.6543	-1.73333	5.20252e-33	down	Cellular Component: integral component of membrane (GO:0016021);; Molecular Function: transmembrane transporter activity (GO:0022857);;	K14445|5.2e-183|myi:110465826|K14445 solute carrier family 13 (sodium-dependent dicarboxylate transporter), member 2/3/5 | (RefSeq) solute carrier family 13 member 2-like isoform X1	solute carrier family 13 member 2 [Crassostrea gigas]
Cg08878	0.467304	4.03525	-2.43521	1.53515e-10	down	--	--	secretory phospholipase A2 receptor-like isoform X1 [Crassostrea gigas]
Cg06337	0.52706	2.0116	-1.64516	8.7639e-07	down	Cellular Component: integral component of membrane (GO:0016021);;	--	uncharacterized protein LOC117693024 isoform X1 [Crassostrea gigas]
Cg08405	1.14153	7.05159	-1.93969	5.57142e-06	down	Molecular Function: molecular_function (GO:0003674);; Molecular Function: structural molecule activity (GO:0005198);; Molecular Function: extracellular matrix structural constituent (GO:0005201);; Cellular Component: cellular_component (GO:0005575);; Cellular Component: extracellular region (GO:0005576);; Molecular Function: extracellular matrix constituent conferring elasticity (GO:0030023);; Mo…	K23284|8.3e-26|crg:105320984|K23284 C1q-related factor | (RefSeq) C1q-related factor	complement C1q tumor necrosis factor-related protein 3 [Crassostrea gigas]
Crassostrea_gigas_newGene_14989	4.04283	12.414	-1.34737	0.000434385	down	Molecular Function: iron ion binding (GO:0005506);; Molecular Function: oxidoreductase activity, acting on single donors with incorporation of molecular oxygen, incorporation of two atoms of oxygen (GO:0016702);;	--	uncharacterized protein LOC105340252 isoform X6 [Crassostrea gigas]
Cg29862	3.36282	0.880488	1.36945	0.00306554	up	Molecular Function: zinc ion binding (GO:0008270);;	K11997|7.7e-21|myi:110460273|K11997 tripartite motif-containing protein 2/3 | (RefSeq) tripartite motif-containing protein 45-like	tripartite motif-containing protein 45-like [Crassostrea gigas]
Cg24707	14.6494	1.34295	2.00248	4.04594e-05	up	Biological Process: formation of cytoplasmic translation initiation complex (GO:0001732);; Molecular Function: translation initiation factor activity (GO:0003743);; Cellular Component: eukaryotic translation initiation factor 3 complex (GO:0005852);; Cellular Component: eukaryotic 43S preinitiation complex (GO:0016282);; Cellular Component: eukaryotic 48S preinitiation complex (GO:0033290);;	--	--
Cg21952	4.81835	1.09439	1.34352	0.00721242	up	Molecular Function: oxidoreductase activity (GO:0016491);;	K12259|1.5e-265|crg:105319590|K12259 spermine oxidase [EC:1.5.3.16 1.5.3.-] | (RefSeq) spermine oxidase	spermine oxidase-like [Crassostrea gigas]
Cg23787	0.566346	1.45885	-1.13663	0.00311389	down	Molecular Function: DNA binding (GO:0003677);; Molecular Function: scavenger receptor activity (GO:0005044);; Cellular Component: nucleus (GO:0005634);; Cellular Component: membrane (GO:0016020);;	K06545|1.9e-28|tmu:101360710|K06545 CD163 antigen | (RefSeq) scavenger receptor cysteine-rich type 1 protein M130	protein PFC0760c-like isoform X1 [Crassostrea gigas]
Crassostrea_gigas_newGene_16604	2.29166	0.528938	1.61131	7.7158e-05	up	--	K23222|6.9e-45|crg:105347237|K23222 nuclease HARBI1 [EC:3.1.-.-] | (RefSeq) putative nuclease HARBI1	putative nuclease HARBI1 [Crassostrea gigas]
Crassostrea_gigas_newGene_8522	1.00474	3.44607	-1.41319	0.000659437	down	--	K21754|9.1e-18|crg:105323828|K21754 BTB/POZ domain-containing protein KCTD1/15 | (RefSeq) uncharacterized protein LOC105323828	uncharacterized protein LOC105322483 isoform X1 [Crassostrea gigas]
Cg08190	0.605433	2.20938	-1.73012	7.14892e-11	down	Molecular Function: zinc ion binding (GO:0008270);;	K11997|6.4e-211|crg:105332340|K11997 tripartite motif-containing protein 2/3 | (RefSeq) uncharacterized protein LOC105332340	uncharacterized protein LOC105342785 [Crassostrea gigas]
Cg18559	0.355358	1.50768	-1.54792	0.000430944	down	Biological Process: carbohydrate metabolic process (GO:0005975);; Molecular Function: transferase activity, transferring glycosyl groups (GO:0016757);;	K07966|1.8e-72|crg:105325111|K07966 beta-1,4-galactosyltransferase 1 [EC:2.4.1.22 2.4.1.90 2.4.1.38 2.4.1.-] | (RefSeq) beta-1,4-N-acetylgalactosaminyltransferase bre-4	beta-1,4-galactosyltransferase 4 [Crassostrea gigas]
Crassostrea_gigas_newGene_1928	6.30956	28.6794	-1.63371	8.82185e-05	down	--	--	uncharacterized protein LOC117685697 [Crassostrea gigas]
Cg04614	4.83978	0.185422	2.58778	5.41087e-08	up	--	--	uncharacterized protein LOC105323960 [Crassostrea gigas]
Cg25660	0.403177	1.48255	-1.5754	1.32924e-05	down	Molecular Function: zinc ion binding (GO:0008270);;	K12026|0.0e+00|crg:109618359|K12026 tripartite motif-containing protein 56 [EC:2.3.2.27] | (RefSeq) uncharacterized protein LOC109618359	uncharacterized protein LOC117690200 isoform X2 [Crassostrea gigas]
Cg16079	0.34971	1.40071	-1.67137	2.53619e-06	down	--	--	uncharacterized protein LOC105336323 isoform X1 [Crassostrea gigas]
Cg08422	0	4.11407	-1.32915	0.00712944	down	--	--	uncharacterized protein LOC117690862 [Crassostrea gigas]
Cg09649	10.0235	31.3861	-1.62274	5.17895e-23	down	Cellular Component: integral component of membrane (GO:0016021);; Biological Process: oxidation-reduction process (GO:0055114);;	--	putative ferric-chelate reductase 1 [Crassostrea gigas]
Cg10898	5.42697	0.109908	2.89723	9.94175e-10	up	Molecular Function: nucleic acid binding (GO:0003676);; Molecular Function: helicase activity (GO:0004386);; Molecular Function: ATP binding (GO:0005524);;	K03654|9.2e-99|crg:109619424|K03654 ATP-dependent DNA helicase RecQ [EC:3.6.4.12] | (RefSeq) uncharacterized protein LOC109619424	ATP-dependent DNA helicase RecQ [Crassostrea gigas]
Cg26545	38.4276	9.25933	1.90787	1.42389e-18	up	Cellular Component: integral component of membrane (GO:0016021);;	--	uncharacterized protein LOC105320098 [Crassostrea gigas]
Crassostrea_gigas_newGene_12825	10.2287	4.31717	1.12311	9.11694e-06	up	Molecular Function: zinc ion binding (GO:0008270);;	K11997|2.0e-13|crg:105348404|K11997 tripartite motif-containing protein 2/3 | (RefSeq) uncharacterized protein LOC105348404	E3 ubiquitin-protein ligase Trim36 isoform X2 [Crassostrea gigas]
Cg00771	0.0898275	3.06076	-2.71693	5.63621e-09	down	Molecular Function: nucleic acid binding (GO:0003676);; Biological Process: DNA integration (GO:0015074);;	--	uncharacterized protein LOC109617119 [Crassostrea gigas]
Cg22458	0.460646	0.190067	1.02727	0.00372478	up	Molecular Function: zinc ion binding (GO:0008270);;	K12035|4.1e-172|crg:105344902|K12035 tripartite motif-containing protein 71 [EC:2.3.2.27] | (RefSeq) uncharacterized protein LOC105344902	uncharacterized protein LOC105323903 [Crassostrea gigas]
Cg23796	0.229363	1.11049	-1.77293	8.03574e-06	down	--	--	uncharacterized transmembrane protein DDB_G0289901-like [Crassostrea gigas]
Cg25682	2.43826	0.906632	1.18316	0.000955482	up	Molecular Function: protein binding (GO:0005515);;	K16726|1.1e-17|crg:105326597|K16726 ankyrin repeat domain-containing protein 17 | (RefSeq) serine/threonine-protein phosphatase 6 regulatory ankyrin repeat subunit B	serine/threonine-protein phosphatase 6 regulatory ankyrin repeat subunit B-like isoform X2 [Crassostrea gigas]
Cg08273	0.640339	2.40505	-1.6175	2.98029e-06	down	Molecular Function: zinc ion binding (GO:0008270);; Cellular Component: integral component of membrane (GO:0016021);;	K17387|1.5e-10|dle:111177769|K17387 kinesin family member 23 | (RefSeq) KIF23; LOW QUALITY PROTEIN: kinesin-like protein KIF23	membrane progestin receptor beta [Crassostrea gigas]
Cg20247	18.747	8.41336	1.06596	1.21639e-06	up	--	--	cell wall integrity and stress response component 4-like [Crassostrea gigas]
Crassostrea_gigas_newGene_6736	0.105962	1.36577	-2.74915	5.32581e-12	down	Molecular Function: double-stranded RNA binding (GO:0003725);; Cellular Component: integral component of membrane (GO:0016021);;	--	uncharacterized protein LOC105336293 [Crassostrea gigas]
Crassostrea_gigas_newGene_2062	7.69093	0	8.02258	4.2892e-131	up	Molecular Function: nucleic acid binding (GO:0003676);; Molecular Function: DNA binding (GO:0003677);; Cellular Component: nucleus (GO:0005634);;	--	unnamed protein product [Mytilus coruscus]
Crassostrea_gigas_newGene_11313	0.391058	3.18696	-1.45584	0.00479411	down	Cellular Component: integral component of membrane (GO:0016021);;	--	uncharacterized protein LOC105321631 [Crassostrea gigas]
Cg10804	1.82483	0.108307	2.25525	3.07861e-06	up	Molecular Function: DNA binding (GO:0003677);;	K22754|1.4e-06|hmg:105846748|K22754 E3 ubiquitin-protein ligase RNF213 [EC:2.3.2.27] | (RefSeq) E3 ubiquitin-protein ligase RNF213-like	unnamed protein product [Mytilus coruscus]
Cg12778	5.95269	0.486795	1.32447	0.00911173	up	--	--	uncharacterized protein LOC105327787 [Crassostrea gigas]
Cg08556	61.6082	3.96571	3.46404	9.73817e-32	up	--	K23284|1.4e-37|crg:105324341|K23284 C1q-related factor | (RefSeq) collagen alpha-1(X) chain-like	complement C1q-like protein 2 [Crassostrea gigas]
Cg09886	0.129631	0.679485	-1.54152	0.00130981	down	--	K14819|4.0e-16|gja:107111858|K14819 dual specificity phosphatase 12 [EC:3.1.3.16 3.1.3.48] | (RefSeq) DUSP12; dual specificity phosphatase 12	uncharacterized protein LOC105339917 [Crassostrea gigas]
Cg03025	0.440938	2.49852	-1.81822	2.90607e-05	down	Molecular Function: protein binding (GO:0005515);;	K12567|5.0e-29|obi:106877301|K12567 titin [EC:2.7.11.1] | (RefSeq) titin-like	kinesin-related protein 4 [Crassostrea gigas]
Cg08066	0.415149	3.26639	-1.69887	0.000600848	down	--	K05204|2.6e-52|sanh:107676315|K05204 glutamate receptor, ionotropic kainate 4 | (RefSeq) uncharacterized protein LOC107676315	uncharacterized protein LOC117683851 isoform X10 [Crassostrea gigas]
Cg07873	1.69975	0.0687249	1.57986	0.0014496	up	--	K06491|5.5e-101|crg:105324019|K06491 neural cell adhesion molecule | (RefSeq) hemicentin-1	uncharacterized protein LOC105347399 isoform X1 [Crassostrea gigas]
Cg07752	1.35706	14.9718	-2.99261	2.63077e-21	down	Cellular Component: integral component of membrane (GO:0016021);;	K23896|3.1e-09|amj:102575459|K23896 proline-rich transmembrane protein 1 | (RefSeq) PRRT1; proline rich transmembrane protein 1	proline-rich transmembrane protein 1 [Crassostrea gigas]
Crassostrea_gigas_newGene_11164	0.0908493	1.69403	-1.75571	0.00050501	down	--	--	uncharacterized protein LOC105325703 isoform X2 [Crassostrea gigas]
Cg05654	7.33085	3.1695	1.13058	5.68596e-09	up	Molecular Function: ATP binding (GO:0005524);; Molecular Function: cob(I)yrinic acid a,c-diamide adenosyltransferase activity (GO:0008817);;	K00798|6.4e-104|crg:105343480|K00798 cob(I)alamin adenosyltransferase [EC:2.5.1.17] | (RefSeq) cob(I)yrinic acid a,c-diamide adenosyltransferase, mitochondrial-like	corrinoid adenosyltransferase isoform X2 [Crassostrea gigas]
Cg07452	2.2884	0.255413	2.18921	5.17241e-07	up	Cellular Component: integral component of membrane (GO:0016021);;	--	uncharacterized protein LOC117682464 isoform X2 [Crassostrea gigas]
Cg14786	1.25784	3.778	-1.44007	3.22068e-06	down	--	--	uncharacterized protein LOC111123619 isoform X2 [Crassostrea virginica]
Cg01041	1.36873	0.163917	1.51047	0.00333293	up	--	K06776|8.4e-56|crg:105328169|K06776 receptor-type tyrosine-protein phosphatase kappa [EC:3.1.3.48] | (RefSeq) receptor-type tyrosine-protein phosphatase epsilon	multiple epidermal growth factor-like domains protein 11 isoform X2 [Crassostrea gigas]
Crassostrea_gigas_newGene_15069	0.592734	2.08825	-1.32989	0.00344721	down	Cellular Component: integral component of membrane (GO:0016021);;	--	protein draper-like [Crassostrea gigas]
Cg20455	122.778	8.20512	3.69044	8.69741e-84	up	Molecular Function: symporter activity (GO:0015293);; Cellular Component: integral component of membrane (GO:0016021);; Molecular Function: hydrolase activity (GO:0016787);;	--	protein usf isoform X2 [Crassostrea gigas]
Cg24060	1.27152	3.68489	-1.35171	7.05155e-05	down	Molecular Function: nucleic acid binding (GO:0003676);;	K11665|2.6e-21|lak:106157780|K11665 DNA helicase INO80 [EC:3.6.4.12] | (RefSeq) uncharacterized protein LOC106157780	protein mono-ADP-ribosyltransferase PARP14 isoform X2 [Crassostrea gigas]
Crassostrea_gigas_newGene_8371	3.97141	0.670471	1.75348	0.000141177	up	--	K03678|6.4e-19|crg:105348766|K03678 exosome complex component RRP45 | (RefSeq) exosome complex component RRP45-like isoform X1	uncharacterized protein LOC117683598 isoform X2 [Crassostrea gigas]
Cg12174	0.747552	4.60182	-1.96215	4.10235e-06	down	Cellular Component: integral component of membrane (GO:0016021);;	K19867|4.2e-13|crg:105320251|K19867 LIM domain-binding protein 3 | (RefSeq) PDZ and LIM domain protein 7	uncharacterized protein LOC105327612 isoform X2 [Crassostrea gigas]
Cg17635	0.882208	2.96694	-1.60854	2.10804e-09	down	Molecular Function: nucleic acid binding (GO:0003676);; Molecular Function: exonuclease activity (GO:0004527);; Molecular Function: zinc ion binding (GO:0008270);;	K18417|1.3e-117|myi:110466927|K18417 ERI1 exoribonuclease 2 [EC:3.1.-.-] | (RefSeq) ERI1 exoribonuclease 2-like	ERI1 exoribonuclease 2 [Crassostrea gigas]
Crassostrea_gigas_newGene_3701	1.1122	0.147885	1.7495	0.000357936	up	Molecular Function: zinc ion binding (GO:0008270);;	K11997|1.2e-234|crg:105323897|K11997 tripartite motif-containing protein 2/3 | (RefSeq) uncharacterized protein LOC105323897	uncharacterized protein LOC117682687 [Crassostrea gigas]
Crassostrea_gigas_newGene_14237	6.88651	1.76849	1.36954	0.0021226	up	Molecular Function: zinc ion binding (GO:0008270);;	K11997|3.0e-160|crg:105323897|K11997 tripartite motif-containing protein 2/3 | (RefSeq) uncharacterized protein LOC105323897	uncharacterized protein LOC117683802 [Crassostrea gigas]
Cg24099	7.23387	2.3913	1.40454	2.06253e-06	up	--	--	uncharacterized protein LOC105319502 [Crassostrea gigas]
Cg10471	8.40349	31.1201	-1.33552	0.00440658	down	--	K17341|5.4e-41|phyp:113529027|K17341 hemicentin | (RefSeq) hmcn1; hemicentin-1 isoform X1	uncharacterized protein LOC105328786 [Crassostrea gigas]
Cg29878	0.520638	7.05044	-2.26568	1.30132e-06	down	Cellular Component: integral component of membrane (GO:0016021);;	--	uncharacterized protein LOC117683570 isoform X3 [Crassostrea gigas]
Cg04386	0.241763	2.75025	-1.94002	6.85487e-05	down	--	--	uncharacterized protein LOC105346389 [Crassostrea gigas]
Cg00322	1.2911	0.103743	2.03806	2.81311e-05	up	--	--	uncharacterized protein LOC105323960 [Crassostrea gigas]
Cg25486	8.8799	0.259695	2.63178	4.13277e-08	up	Cellular Component: collagen trimer (GO:0005581);;	--	short-chain collagen C4 [Crassostrea gigas]
Cg00045	0.651066	2.56358	-1.40554	0.00243317	down	--	K11997|4.2e-249|crg:109619606|K11997 tripartite motif-containing protein 2/3 | (RefSeq) uncharacterized protein LOC109619606	uncharacterized protein LOC109620628 [Crassostrea gigas]
Cg01327	43.7827	5.94633	1.83569	0.00012636	up	--	K16726|4.7e-234|crg:105330604|K16726 ankyrin repeat domain-containing protein 17 | (RefSeq) uncharacterized protein LOC105330604	uncharacterized protein LOC117688541 [Crassostrea gigas]
Cg30115	6.69904	1.89495	1.4064	0.000681358	up	--	--	uncharacterized protein LOC117683788 [Crassostrea gigas]
Cg08323	0.603029	6.61637	-2.28198	4.65684e-07	down	--	--	uncharacterized protein LOC117692058 isoform X1 [Crassostrea gigas]
Crassostrea_gigas_newGene_1304	10.1919	19.8305	-1.09128	1.99595e-05	down	Molecular Function: zinc ion binding (GO:0008270);;	K11997|1.5e-88|crg:105332950|K11997 tripartite motif-containing protein 2/3 | (RefSeq) tripartite motif-containing protein 55-like isoform X2	tripartite motif-containing protein 2 [Crassostrea gigas]
Cg12610	3.27919	1.27713	1.28679	8.53828e-15	up	Molecular Function: protein binding (GO:0005515);;	K23213|1.5e-70|gja:107121681|K23213 paired amphipathic helix protein Sin3b | (RefSeq) NACHT domain- and WD repeat-containing protein 1-like	NACHT and WD repeat domain-containing protein 2 [Crassostrea gigas]
Cg28310	0.594222	1.93606	-1.24858	0.00588897	down	Molecular Function: calcium ion binding (GO:0005509);;	K02183|8.3e-59|crg:105322084|K02183 calmodulin | (RefSeq) calmodulin	neo-calmodulin isoform X2 [Crassostrea gigas]
Crassostrea_gigas_newGene_952	0.610428	2.27404	-1.39389	0.00181447	down	--	--	uncharacterized protein LOC117688914 isoform X4 [Crassostrea gigas]
Cg29333	8.20901	1.09885	2.18955	6.2076e-08	up	Molecular Function: calcium ion binding (GO:0005509);;	--	sarcoplasmic calcium-binding protein isoform X2 [Crassostrea gigas]
Cg01529	4.22145	11.1909	-1.32619	2.7355e-07	down	Molecular Function: DNA binding (GO:0003677);; Cellular Component: nucleus (GO:0005634);;	K17538|4.4e-62|tng:GSTEN00016101G001|K17538 pseudopodium-enriched atypical kinase 1 [EC:2.7.10.2] | (RefSeq) unnamed protein product	high mobility group protein 20A [Crassostrea gigas]
Cg07345	0.336826	1.09586	-1.281	0.00383222	down	Molecular Function: iron ion binding (GO:0005506);; Biological Process: glutamate biosynthetic process (GO:0006537);; Molecular Function: FMN binding (GO:0010181);; Molecular Function: glutamate synthase (NADH) activity (GO:0016040);; Molecular Function: flavin adenine dinucleotide binding (GO:0050660);; Molecular Function: 3 iron, 4 sulfur cluster binding (GO:0051538);;	--	uncharacterized protein LOC117691867 [Crassostrea gigas]
Crassostrea_gigas_newGene_14307	2.12294	0.49768	1.53712	0.000325446	up	--	K12035|2.3e-70|crg:105344902|K12035 tripartite motif-containing protein 71 [EC:2.3.2.27] | (RefSeq) uncharacterized protein LOC105344902	uncharacterized protein LOC105323061 [Crassostrea gigas]
Cg11559	1.64251	0.751269	1.01755	5.27145e-05	up	Molecular Function: nucleic acid binding (GO:0003676);; Molecular Function: zinc ion binding (GO:0008270);; Cellular Component: integral component of membrane (GO:0016021);;	--	uncharacterized protein LOC105348885 isoform X2 [Crassostrea gigas]
Cg10899	1.38808	0.176394	2.11207	1.32283e-06	up	--	--	uncharacterized protein LOC105342678 [Crassostrea gigas]
Cg16378	16.2325	33.7692	-1.03328	3.40277e-06	down	Biological Process: cell adhesion (GO:0007155);; Cellular Component: integral component of membrane (GO:0016021);; Molecular Function: cadherin binding (GO:0045296);;	K17081|9.5e-95|crg:105320739|K17081 prohibitin 2 | (RefSeq) uncharacterized protein LOC105320739	uncharacterized protein LOC117681676 [Crassostrea gigas]
Crassostrea_gigas_newGene_10152	337.131	53.0694	1.98158	3.29329e-06	up	Molecular Function: carbohydrate binding (GO:0030246);;	K06560|2.3e-16|adf:107354277|K06560 mannose receptor, C type | (RefSeq) macrophage mannose receptor 1-like	perlucin-like protein [Crassostrea gigas]
Cg17792	0.933437	0.00305763	4.35306	6.55729e-23	up	Molecular Function: zinc ion binding (GO:0008270);; Molecular Function: metal ion binding (GO:0046872);;	K12026|0.0e+00|crg:105345778|K12026 tripartite motif-containing protein 56 [EC:2.3.2.27] | (RefSeq) tripartite motif-containing protein 2-like	uncharacterized protein LOC117684659 [Crassostrea gigas]
Cg14878	0.541618	1.39274	-1.154	0.00204885	down	--	K01518|1.5e-19|aplc:110987942|K01518 bis(5'-nucleosidyl)-tetraphosphatase [EC:3.6.1.17] | (RefSeq) uncharacterized protein LOC110987942 isoform X1	uncharacterized protein LOC117688239 isoform X2 [Crassostrea gigas]
Crassostrea_gigas_newGene_13256	1.80129	0.0341168	4.57656	2.24292e-53	up	Molecular Function: nucleic acid binding (GO:0003676);; Biological Process: DNA integration (GO:0015074);;	K06065|1.0e-261|xma:102225078|K06065 nuclear receptor co-repressor 2 | (RefSeq) uncharacterized protein LOC102225078	LOW QUALITY PROTEIN: uncharacterized protein LOC111101920 [Crassostrea virginica]
Crassostrea_gigas_newGene_4940	0.014066	3.00437	-4.68754	1.41213e-30	down	--	K19410|3.2e-10|dpa:109543998|K19410 inner nuclear membrane protein Man1 | (RefSeq) uncharacterized protein LOC109543998 isoform X1	uncharacterized protein LOC117682085 isoform X2 [Crassostrea gigas]
Cg05527	3.10397	0.0841435	2.77633	5.13794e-09	up	Molecular Function: nucleic acid binding (GO:0003676);;	K15261|6.2e-18|uah:113252275|K15261 poly [ADP-ribose] polymerase 10/14/15 [EC:2.4.2.30] | (RefSeq) PARP14; poly [ADP-ribose] polymerase 14 isoform X1	uncharacterized protein LOC117692521 [Crassostrea gigas]
Crassostrea_gigas_newGene_7643	0.316912	17.8014	-2.545	1.27964e-07	down	--	K07665|3.2e-12|api:107884559|K07665 two-component system, OmpR family, copper resistance phosphate regulon response regulator CusR | (RefSeq) uncharacterized protein LOC107884559	uncharacterized protein LOC105346331 [Crassostrea gigas]
Cg14474	36.811	76.4319	-1.05023	2.51061e-11	down	--	--	uncharacterized protein LOC105344827 isoform X3 [Crassostrea gigas]
Cg25070	3.59484	1.33367	1.31825	1.87755e-08	up	Cellular Component: extracellular space (GO:0005615);;	K13963|1.1e-64|els:105019447|K13963 serpin B | (RefSeq) leukocyte elastase inhibitor-like isoform X1	leukocyte elastase inhibitor [Crassostrea gigas]
Cg10989	2.19253	0.64422	1.25932	0.00639223	up	Molecular Function: molecular_function (GO:0003674);; Molecular Function: binding (GO:0005488);; Molecular Function: macromolecular complex binding (GO:0044877);;	--	uncharacterized protein LOC105346339 [Crassostrea gigas]
Cg27330	3.05759	0.00303875	6.85348	7.96123e-83	up	Cellular Component: lytic vacuole (GO:0000323);; Biological Process: skeletal system development (GO:0001501);; Molecular Function: molecular_function (GO:0003674);; Molecular Function: metalloendopeptidase activity (GO:0004222);; Molecular Function: structural molecule activity (GO:0005198);; Molecular Function: extracellular matrix structural constituent (GO:0005201);; Molecular Function: bindi…	K13047|1.4e-25|spis:111329147|K13047 tolloid-like protein 2 [EC:3.4.24.-] | (RefSeq) uncharacterized protein LOC111329147	uncharacterized protein LOC105337195 [Crassostrea gigas]
Cg13983	0.502891	1.93817	-1.54167	0.000137928	down	Molecular Function: ligase activity (GO:0016874);;	K23617|1.7e-21|nve:5509130|K23617 medium-chain acyl-CoA ligase, mitochondrial [EC:6.2.1.2] | (RefSeq) medium-chain acyl-CoA ligase ACSF2, mitochondrial	long-chain-fatty-acid--CoA ligase heimdall [Crassostrea gigas]
Crassostrea_gigas_newGene_14264	9.1215	72.8489	-2.55713	1.08712e-13	down	--	K10074|1.3e-45|crg:105326444|K10074 C-type lectin domain family 7 member A | (RefSeq) C-type lectin domain family 7 member A-like	perlucin-like protein [Crassostrea gigas]
Cg25418	1.14566	4.09735	-1.62078	1.10966e-07	down	--	--	uncharacterized protein LOC117690142 [Crassostrea gigas]
Crassostrea_gigas_newGene_4005	3.17879	0.307804	1.70006	0.000761434	up	Molecular Function: nucleic acid binding (GO:0003676);; Biological Process: DNA integration (GO:0015074);;	K13356|7.1e-113|nvi:100117878|K13356 alcohol-forming fatty acyl-CoA reductase [EC:1.2.1.84] | (RefSeq) putative fatty acyl-CoA reductase CG5065 isoform X1	uncharacterized protein LOC117692971 [Crassostrea gigas]
Cg03241	4.63489	1.29531	1.29553	0.00552442	up	Molecular Function: nucleic acid binding (GO:0003676);; Molecular Function: helicase activity (GO:0004386);; Molecular Function: ATP binding (GO:0005524);;	K03654|1.4e-257|crg:105320877|K03654 ATP-dependent DNA helicase RecQ [EC:3.6.4.12] | (RefSeq) ATP-dependent DNA helicase Q-like SIM	ATP-dependent DNA helicase Q-like SIM [Crassostrea gigas]
Cg15855	1.82795	0.559066	1.35527	0.000389254	up	--	K10693|4.8e-89|tng:GSTEN00027943G001|K10693 RCR-type E3 ubiquitin transferase [EC:2.3.2.33] | (RefSeq) unnamed protein product	E3 ubiquitin-protein ligase MYCBP2-like [Crassostrea gigas]
Cg26943	2.42694	6.06325	-1.28737	1.1536e-13	down	Biological Process: carbohydrate metabolic process (GO:0005975);; Molecular Function: kinase activity (GO:0016301);;	K00851|3.5e-98|crg:105322129|K00851 gluconokinase [EC:2.7.1.12] | (RefSeq) probable gluconokinase	probable gluconokinase [Crassostrea gigas]
Cg21208	1.82746	3.85051	-1.00378	0.000800325	down	Molecular Function: ATP binding (GO:0005524);; Cellular Component: integral component of membrane (GO:0016021);; Molecular Function: ATPase activity (GO:0016887);;	K21396|8.4e-70|sko:100374352|K21396 ATP-binding cassette, subfamily G (WHITE), eye pigment precursor transporter | (RefSeq) protein white-like	ABC transporter G family member 22 [Crassostrea gigas]
Cg07522	1.00823	0.372399	1.11745	0.00747633	up	Molecular Function: scavenger receptor activity (GO:0005044);;	K23400|3.5e-08|myi:110450139|K23400 doublecortin domain-containing protein 1 | (RefSeq) uncharacterized protein LOC110450139	uncharacterized protein LOC117691704 [Crassostrea gigas]
Cg06043	2.82425	0.0850809	3.30768	1.76323e-14	up	--	--	uncharacterized protein LOC105323960 [Crassostrea gigas]
Cg21614	235.379	624.684	-1.37472	6.54493e-13	down	Molecular Function: calcium ion binding (GO:0005509);;	K04596|4.7e-09|nve:5504243|K04596 adhesion G protein-coupled receptor B1 | (RefSeq) uncharacterized protein LOC5504243 isoform X2	latent-transforming growth factor beta-binding protein 1 isoform X1 [Crassostrea gigas]
Cg00655	0	0.948844	-3.60682	1.39167e-15	down	Cellular Component: integral component of membrane (GO:0016021);;	K13297|2.5e-72|crg:105344922|K13297 receptor-type tyrosine-protein phosphatase T [EC:3.1.3.48] | (RefSeq) receptor-type tyrosine-protein phosphatase T	multiple epidermal growth factor-like domains protein 10 isoform X3 [Crassostrea gigas]
Cg08192	1.19	2.54692	-1.04903	7.92567e-06	down	--	K11997|1.1e-38|crg:105326056|K11997 tripartite motif-containing protein 2/3 | (RefSeq) tripartite motif-containing protein 55	uncharacterized protein LOC117684664 isoform X1 [Crassostrea gigas]
Crassostrea_gigas_newGene_13165	1.69031	0.426021	1.59411	0.000175536	up	--	--	uncharacterized protein LOC105324993 isoform X1 [Crassostrea gigas]
Cg29700	2.14806	0.940598	1.0104	0.00307283	up	Cellular Component: integral component of membrane (GO:0016021);;	--	mucin-22 isoform X1 [Crassostrea gigas]
Crassostrea_gigas_newGene_2150	0.300115	0.951641	-1.36959	0.000219793	down	--	K16768|5.6e-09|npr:108797542|K16768 centrosomal protein CEP350 | (RefSeq) CEP350; centrosome-associated protein 350	uncharacterized protein LOC105346071 isoform X1 [Crassostrea gigas]
Cg08076	0.966196	3.90399	-1.57226	0.000158634	down	Cellular Component: integral component of membrane (GO:0016021);;	--	uncharacterized protein LOC117686160 isoform X1 [Crassostrea gigas]
Cg08886	1.06734	6.43402	-1.5097	0.00269251	down	Molecular Function: oxidoreductase activity, acting on single donors with incorporation of molecular oxygen, incorporation of two atoms of oxygen (GO:0016702);; Molecular Function: metal ion binding (GO:0046872);;	K08022|8.3e-07|crg:105333212|K08022 arachidonate 15-lipoxygenase (second type) / 8-lipoxygenase (S-type) [EC:1.13.11.33 1.13.11.-] | (RefSeq) allene oxide synthase-lipoxygenase protein-like	allene oxide synthase-lipoxygenase protein [Crassostrea gigas]
Cg29954	1.89415	4.51721	-1.14677	0.000132031	down	Molecular Function: hydrolase activity (GO:0016787);;	K01050|8.0e-190|crg:105343879|K01050 cholinesterase [EC:3.1.1.8] | (RefSeq) carboxylesterase 1C	carboxylesterase 1C-like isoform X1 [Crassostrea gigas]
Cg18460	1.45949	7.7335	-1.66272	0.000325505	down	Molecular Function: calcium ion binding (GO:0005509);;	K19601|3.1e-19|csem:103387287|K19601 protein eyes shut | (RefSeq) neurogenic locus notch homolog protein 1	uncharacterized protein LOC105338770 [Crassostrea gigas]
Crassostrea_gigas_newGene_9997	7.60811	1.99324	1.34015	0.00425328	up	Molecular Function: G-protein coupled receptor activity (GO:0004930);; Cellular Component: integral component of membrane (GO:0016021);;	--	uncharacterized protein LOC117681112 isoform X1 [Crassostrea gigas]
Cg15136	2.81226	9.29227	-1.68313	8.35287e-21	down	--	K10609|8.6e-21|amex:111188264|K10609 cullin 4 | (RefSeq) LOW QUALITY PROTEIN: cullin-4A-like	heat shock 70 kDa protein 12A [Crassostrea gigas]
Cg25175	8.9389	2.05743	1.86574	9.71682e-11	up	Biological Process: mRNA export from nucleus (GO:0006406);; Cellular Component: integral component of membrane (GO:0016021);;	K12880|5.6e-133|crg:105336393|K12880 THO complex subunit 3 | (RefSeq) LOW QUALITY PROTEIN: THO complex subunit 3-like	THO complex subunit 3 isoform X1 [Crassostrea gigas]
Cg20251	0.376767	1.02033	-1.13486	0.00672814	down	--	K12026|2.4e-14|lak:106167695|K12026 tripartite motif-containing protein 56 [EC:2.3.2.27] | (RefSeq) E3 ubiquitin-protein ligase TRIM56-like	uncharacterized protein LOC117687422 [Crassostrea gigas]
Cg16736	0.072389	0.208136	-1.31438	8.49598e-05	down	Biological Process: intracellular protein transport (GO:0006886);; Biological Process: regulation of apoptotic process (GO:0042981);;	K15456|3.9e-90|crg:105328772|K15456 protein KTI12 | (RefSeq) uncharacterized protein LOC105328772	uncharacterized protein LOC105324653 isoform X1 [Crassostrea gigas]
Cg10922	0.368805	1.33937	-1.67309	7.27793e-09	down	Molecular Function: zinc ion binding (GO:0008270);;	K12035|1.3e-266|crg:105340842|K12035 tripartite motif-containing protein 71 [EC:2.3.2.27] | (RefSeq) E3 ubiquitin-protein ligase TRIM71	tripartite motif-containing protein 5 [Crassostrea gigas]
Cg29727	1.48792	4.57705	-1.48348	2.12686e-07	down	Molecular Function: 3-hydroxyacyl-CoA dehydrogenase activity (GO:0003857);; Biological Process: fatty acid metabolic process (GO:0006631);;	K07514|3.0e-286|myi:110465017|K07514 enoyl-CoA hydratase / 3-hydroxyacyl-CoA dehydrogenase / 3,2-trans-enoyl-CoA isomerase [EC:4.2.1.17 1.1.1.35 5.3.3.8] | (RefSeq) peroxisomal bifunctional enzyme-like	peroxisomal bifunctional enzyme [Crassostrea gigas]
Cg07571	13.5399	0.00530587	6.109	3.00269e-57	up	Molecular Function: nucleic acid binding (GO:0003676);;	--	DNA polymerase III PolC-type-like [Crassostrea gigas]
Crassostrea_gigas_newGene_15814	1.04021	0.0728333	3.11929	1.03453e-21	up	--	--	uncharacterized protein LOC105334517 [Crassostrea gigas]
Cg12600	0.705497	0.124897	1.9352	7.7761e-07	up	--	K01322|5.1e-20|epa:110234454|K01322 prolyl oligopeptidase [EC:3.4.21.26] | (RefSeq) prolyl endopeptidase isoform X1	uncharacterized protein LOC111109101 [Crassostrea virginica]
Crassostrea_gigas_newGene_11814	167.886	53.101	1.20588	0.00441097	up	Molecular Function: oxidoreductase activity, acting on the aldehyde or oxo group of donors, NAD or NADP as acceptor (GO:0016620);;	K07249|2.9e-288|crg:105334905|K07249 retinal dehydrogenase [EC:1.2.1.36] | (RefSeq) retinal dehydrogenase 1	retinal dehydrogenase 1 [Crassostrea gigas]
Cg13483	0.361705	5.21093	-3.03804	1.25367e-18	down	--	--	uncharacterized protein LOC117680629 isoform X4 [Crassostrea gigas]
Cg25439	1.54621	7.03542	-1.3808	0.00539838	down	Biological Process: system process (GO:0003008);; Molecular Function: molecular_function (GO:0003674);; Molecular Function: receptor binding (GO:0005102);; Molecular Function: binding (GO:0005488);; Molecular Function: protein binding (GO:0005515);; Cellular Component: cellular_component (GO:0005575);; Cellular Component: extracellular region (GO:0005576);; Cellular Component: intracellular (GO:0…	K23284|7.9e-67|crg:105330673|K23284 C1q-related factor | (RefSeq) complement C1q and tumor necrosis factor-related protein 9A	complement C1q-like protein 2 [Crassostrea gigas]
Cg29476	0.637263	1.38705	-1.06882	2.09315e-05	down	Molecular Function: ionotropic glutamate receptor activity (GO:0004970);; Cellular Component: plasma membrane (GO:0005886);; Cellular Component: membrane (GO:0016020);; Cellular Component: integral component of membrane (GO:0016021);;	K05313|6.3e-113|myi:110464602|K05313 glutamate receptor, ionotropic, invertebrate | (RefSeq) uncharacterized protein LOC110464602	glutamate receptor ionotropic, kainate 3 isoform X1 [Crassostrea gigas]
Cg08112	0.0692807	0.686703	-2.29576	6.76827e-08	down	--	K01518|4.7e-09|aplc:110987942|K01518 bis(5'-nucleosidyl)-tetraphosphatase [EC:3.6.1.17] | (RefSeq) uncharacterized protein LOC110987942 isoform X1	uncharacterized protein LOC105322452 [Crassostrea gigas]
Crassostrea_gigas_newGene_7956	7.04633	15.6111	-1.00657	0.00533209	down	--	K14639|2.5e-45|bpec:110165918|K14639 solute carrier family 15, member 5 | (RefSeq) slc15a5; solute carrier family 15 member 5	uncharacterized protein LOC105343844 isoform X2 [Crassostrea gigas]
Crassostrea_gigas_newGene_13708	1.25756	2.87349	-1.15151	4.93866e-08	down	Cellular Component: integral component of membrane (GO:0016021);;	--	uncharacterized protein LOC105320286 [Crassostrea gigas]
Cg10889	122.832	29.4764	1.33394	0.00688642	up	Molecular Function: nucleic acid binding (GO:0003676);; Molecular Function: oxidoreductase activity (GO:0016491);; Molecular Function: flavin adenine dinucleotide binding (GO:0050660);; Biological Process: oxidation-reduction process (GO:0055114);; Molecular Function: FAD binding (GO:0071949);;	--	uncharacterized protein LOC105321760 [Crassostrea gigas]
Cg07020	24.8522	2.95846	2.51274	1.69392e-12	up	Molecular Function: extracellular ligand-gated ion channel activity (GO:0005230);; Molecular Function: ATP binding (GO:0005524);; Cellular Component: integral component of membrane (GO:0016021);; Molecular Function: ligase activity (GO:0016874);; Molecular Function: metal ion binding (GO:0046872);;	K05186|3.5e-81|myi:110443131|K05186 gamma-aminobutyric acid receptor subunit gamma | (RefSeq) gamma-aminobutyric acid receptor subunit gamma-2-like isoform X1	uncharacterized protein LOC117692594 [Crassostrea gigas]
Cg23546	1.33745	0.129414	1.7417	0.000549453	up	Cellular Component: integral component of membrane (GO:0016021);; Molecular Function: transmembrane transporter activity (GO:0022857);;	K14386|5.4e-297|crg:105317234|K14386 solute carrier family 5 (sodium-dependent multivitamin transporter), member 6 | (RefSeq) sodium-coupled monocarboxylate transporter 1-like	sodium-coupled monocarboxylate transporter 1-like [Crassostrea gigas]
Cg29310	15.5863	7.17423	1.06585	6.17031e-17	up	Molecular Function: non-membrane spanning protein tyrosine kinase activity (GO:0004715);; Molecular Function: calcium ion binding (GO:0005509);; Molecular Function: ATP binding (GO:0005524);; Cellular Component: cytoskeleton (GO:0005856);;	K04447|0.0e+00|crg:105333485|K04447 Janus kinase 2 [EC:2.7.10.2] | (RefSeq) tyrosine-protein kinase JAK2-like	tyrosine-protein kinase JAK2 isoform X4 [Crassostrea gigas]
Cg26474	0.250516	1.98606	-2.74718	5.38071e-29	down	--	--	uncharacterized protein LOC105346963 [Crassostrea gigas]
Cg07420	0	0.490356	-4.02066	1.54388e-20	down	--	--	uncharacterized protein LOC105337575 [Crassostrea gigas]
Cg24695	3.59573	11.5844	-1.61401	3.0805e-13	down	--	K06721|3.8e-58|crg:109619449|K06721 C-type lectin domain family 10 member A | (RefSeq) C-type lectin domain family 10 member A-like	uncharacterized protein LOC105322925 [Crassostrea gigas]
Cg08842	1.98996	0.0835975	1.44576	0.00346418	up	Molecular Function: zinc ion binding (GO:0008270);;	K12035|7.4e-38|crg:105339351|K12035 tripartite motif-containing protein 71 [EC:2.3.2.27] | (RefSeq) E3 ubiquitin-protein ligase TRIM71	tripartite motif-containing protein 3-like [Crassostrea gigas]
Cg16653	2.64255	9.57632	-1.66934	2.88353e-08	down	Cellular Component: integral component of membrane (GO:0016021);;	K20051|0.0e+00|crg:105344512|K20051 low-density lipoprotein receptor-related protein 4 | (RefSeq) low-density lipoprotein receptor-related protein 2	low-density lipoprotein receptor-related protein 1B isoform X2 [Crassostrea gigas]
Cg07876	5.71959	1.82683	1.23554	0.0042428	up	Cellular Component: integral component of membrane (GO:0016021);; Molecular Function: carbohydrate binding (GO:0030246);;	K06496|1.3e-56|crg:105348908|K06496 selectin, platelet | (RefSeq) sushi, von Willebrand factor type A, EGF and pentraxin domain-containing protein 1	E-selectin isoform X3 [Crassostrea gigas]
Crassostrea_gigas_newGene_6619	0.0844322	0.740879	-2.11424	1.16143e-06	down	Molecular Function: double-stranded RNA binding (GO:0003725);; Cellular Component: integral component of membrane (GO:0016021);;	--	uncharacterized protein LOC105336293 [Crassostrea gigas]
Cg17767	2.73259	0.759844	1.41815	0.000622168	up	Molecular Function: zinc ion binding (GO:0008270);;	K12026|0.0e+00|crg:105334787|K12026 tripartite motif-containing protein 56 [EC:2.3.2.27] | (RefSeq) transcription intermediary factor 1-alpha-like	tripartite motif-containing protein 45-like [Crassostrea gigas]
Cg23257	0.0160488	10.8558	-6.70706	7.35237e-83	down	Cellular Component: integral component of membrane (GO:0016021);; Molecular Function: transmembrane transporter activity (GO:0022857);;	K14611|2.6e-129|nve:5521845|K14611 solute carrier family 23 (nucleobase transporter), member 1 | (RefSeq) solute carrier family 23 member 2	solute carrier family 23 member 2-like [Crassostrea gigas]
Crassostrea_gigas_newGene_7108	26.0688	10.7079	1.31537	1.52958e-07	up	Molecular Function: RNA binding (GO:0003723);;	K11089|2.5e-62|cge:100766132|K11089 60 kDa SS-A/Ro ribonucleoprotein | (RefSeq) Ro60; 60 kDa SS-A/Ro ribonucleoprotein	60 kDa SS-A/Ro ribonucleoprotein isoform X2 [Crassostrea gigas]
Cg08487	1.91148	0.027053	1.72963	0.00036561	up	Cellular Component: integral component of membrane (GO:0016021);;	K10405|6.3e-19|crg:105324632|K10405 kinesin family member C1 | (RefSeq) protein claret segregational-like	uncharacterized protein LOC105343695 isoform X7 [Crassostrea gigas]
Cg22544	3.43522	8.79347	-1.25942	4.2029e-06	down	Molecular Function: heme transporter activity (GO:0015232);; Cellular Component: integral component of membrane (GO:0016021);;	K15380|5.5e-44|lgi:LOTGIDRAFT_235195|K15380 solute carrier family 48 (heme transporter), member 1 | (RefSeq) hypothetical protein	heme transporter hrg1-A isoform X2 [Crassostrea gigas]
Cg01066	0.242198	2.24028	-1.57076	0.00211176	down	--	K11997|2.2e-133|crg:109619606|K11997 tripartite motif-containing protein 2/3 | (RefSeq) uncharacterized protein LOC109619606	uncharacterized protein LOC105334146 isoform X2 [Crassostrea gigas]
Cg18215	0.525931	1.20871	-1.10065	0.000194128	down	Molecular Function: protein kinase activity (GO:0004672);; Molecular Function: ATP binding (GO:0005524);; Cellular Component: integral component of membrane (GO:0016021);;	K01049|3.6e-190|myi:110449240|K01049 acetylcholinesterase [EC:3.1.1.7] | (RefSeq) cholinesterase 1-like isoform X1	fatty acyl-CoA hydrolase precursor, medium chain-like [Crassostrea gigas]
Cg11865	3.01737	0.0749305	2.01806	4.07817e-05	up	--	--	uncharacterized protein LOC117685512 isoform X1 [Crassostrea gigas]
Cg22085	0.843394	0.233023	1.33861	0.00266654	up	Cellular Component: integral component of membrane (GO:0016021);;	K04179|6.6e-29|myi:110457458|K04179 C-C chemokine receptor type 4 | (RefSeq) cysteinyl leukotriene receptor 2-like	hypothetical protein KP79_PYT18039 [Mizuhopecten yessoensis]
Cg25546	1.62676	10.1995	-1.98328	2.57408e-06	down	Molecular Function: lipid transporter activity (GO:0005319);;	--	LOW QUALITY PROTEIN: uncharacterized protein LOC111105051 [Crassostrea virginica]
Cg14473	13.4405	1.39415	2.17516	2.16725e-06	up	Molecular Function: chitin synthase activity (GO:0004100);; Cellular Component: integral component of membrane (GO:0016021);;	K00698|8.0e-132|crg:105344892|K00698 chitin synthase [EC:2.4.1.16] | (RefSeq) LOW QUALITY PROTEIN: uncharacterized protein LOC105344892	chitin synthase chs-2 isoform X1 [Crassostrea gigas]
Cg28160	4.63903	13.9957	-1.47327	1.51953e-07	down	Molecular Function: calcium ion binding (GO:0005509);;	--	uncharacterized protein LOC105340702 [Crassostrea gigas]
Cg14472	11.2613	1.89022	2.21489	4.13194e-12	up	Molecular Function: chitin synthase activity (GO:0004100);; Cellular Component: integral component of membrane (GO:0016021);;	K00698|0.0e+00|crg:105344892|K00698 chitin synthase [EC:2.4.1.16] | (RefSeq) LOW QUALITY PROTEIN: uncharacterized protein LOC105344892	uncharacterized protein LOC105344892 [Crassostrea gigas]
Crassostrea_gigas_newGene_8533	0.212823	2.85326	-3.34379	4.57137e-34	down	Molecular Function: zinc ion binding (GO:0008270);;	--	uncharacterized protein LOC117693126 [Crassostrea gigas]
Crassostrea_gigas_newGene_13874	18.9745	8.66731	1.03998	1.97109e-06	up	Cellular Component: extracellular region (GO:0005576);; Molecular Function: growth factor activity (GO:0008083);;	K05497|1.3e-84|myi:110449701|K05497 growth differentiation factor 8 | (RefSeq) growth/differentiation factor 8-like	uncharacterized protein LOC105337024 [Crassostrea gigas]
Crassostrea_gigas_newGene_493	0.0106377	0.633159	-3.23044	3.6236e-13	down	Molecular Function: glycine-tRNA ligase activity (GO:0004820);; Molecular Function: ATP binding (GO:0005524);; Cellular Component: cytoplasm (GO:0005737);; Biological Process: glycyl-tRNA aminoacylation (GO:0006426);; Molecular Function: zinc ion binding (GO:0008270);;	K11997|1.7e-57|crg:105343861|K11997 tripartite motif-containing protein 2/3 | (RefSeq) tripartite motif-containing protein 2-like	E3 ubiquitin-protein ligase TRIM71-like [Crassostrea gigas]
Crassostrea_gigas_newGene_12260	5.23692	2.22878	1.11015	0.000203853	up	Biological Process: cyclic nucleotide biosynthetic process (GO:0009190);; Biological Process: intracellular signal transduction (GO:0035556);;	K11265|1.5e-162|spu:574069|K11265 adenylate cyclase 10 [EC:4.6.1.1] | (RefSeq) soluble adenylyl cyclase	adenylate cyclase type 10 isoform X2 [Crassostrea gigas]
Crassostrea_gigas_newGene_11818	1.52516	4.64601	-1.35636	0.000454133	down	Molecular Function: protein binding (GO:0005515);;	K12567|5.5e-34|obi:106877301|K12567 titin [EC:2.7.11.1] | (RefSeq) titin-like	twitchin-like [Crassostrea gigas]
Cg18033	12.7898	4.12566	1.3882	3.62243e-05	up	Biological Process: regulation of neurotransmitter levels (GO:0001505);; Biological Process: urogenital system development (GO:0001655);; Biological Process: kidney development (GO:0001822);; Molecular Function: molecular_function (GO:0003674);; Molecular Function: catalytic activity (GO:0003824);; Molecular Function: nuclease activity (GO:0004518);; Molecular Function: endonuclease activity (GO:…	K09022|1.5e-64|crg:105344826|K09022 2-iminobutanoate/2-iminopropanoate deaminase [EC:3.5.99.10] | (RefSeq) ribonuclease UK114-like isoform X1	2-iminobutanoate/2-iminopropanoate deaminase isoform X1 [Crassostrea gigas]
Cg19943	1.13279	2.74327	-1.18695	1.06647e-05	down	Biological Process: cell redox homeostasis (GO:0045454);;	K03671|6.4e-55|crg:105345488|K03671 thioredoxin 1 | (RefSeq) thioredoxin	thioredoxin [Crassostrea gigas]
Cg02165	1.35738	0.0434672	2.97148	7.58519e-11	up	--	K13297|1.0e-47|crg:105322070|K13297 receptor-type tyrosine-protein phosphatase T [EC:3.1.3.48] | (RefSeq) uncharacterized protein LOC105322070	neurogenic locus protein delta [Crassostrea gigas]
Cg12622	2.40401	0.20993	2.45623	1.27103e-08	up	Molecular Function: zinc ion binding (GO:0008270);; Cellular Component: integral component of membrane (GO:0016021);;	--	uncharacterized protein LOC105339283 isoform X2 [Crassostrea gigas]
Cg10964	0.0814912	1.83229	-4.00816	9.98089e-49	down	--	--	uncharacterized protein LOC117685886 isoform X1 [Crassostrea gigas]
Cg06353	2.29768	0.935082	1.14348	2.27577e-05	up	Molecular Function: methyltransferase activity (GO:0008168);;	K22438|7.8e-44|myi:110453423|K22438 trans-aconitate 3-methyltransferase [EC:2.1.1.145] | (RefSeq) putative methyltransferase DDB_G0268948	putative methyltransferase DDB_G0268948, partial [Crassostrea gigas]
Crassostrea_gigas_newGene_7938	9.20933	1.31403	2.21014	9.34499e-09	up	Molecular Function: zinc ion binding (GO:0008270);;	K11997|8.1e-239|crg:105326056|K11997 tripartite motif-containing protein 2/3 | (RefSeq) tripartite motif-containing protein 55	E3 ubiquitin-protein ligase TRIM71-like [Crassostrea gigas]
Cg16565	56.5891	18.5815	1.39068	2.41816e-05	up	--	--	uncharacterized protein LOC105339529 [Crassostrea gigas]
Cg24337	24.4915	81.8165	-1.68114	1.03841e-16	down	--	--	methyltransferase-like protein 27 isoform X2 [Crassostrea gigas]
Cg01091	0.408822	4.23535	-1.91575	8.31952e-05	down	--	--	multiple epidermal growth factor-like domains protein 10 isoform X2 [Crassostrea gigas]
Cg14612	871.26	394.854	1.05631	1.00856e-06	up	Molecular Function: structural constituent of ribosome (GO:0003735);; Cellular Component: ribosome (GO:0005840);; Biological Process: translation (GO:0006412);;	K02966|6.9e-66|crg:105335239|K02966 small subunit ribosomal protein S19e | (RefSeq) 40S ribosomal protein S19 isoform X2	40S ribosomal protein S19 isoform X1 [Crassostrea gigas]
Cg13183	15.7809	6.48406	1.05403	0.00494581	up	Biological Process: cell morphogenesis (GO:0000902);; Biological Process: cell morphogenesis involved in differentiation (GO:0000904);; Biological Process: behavioral fear response (GO:0001662);; Biological Process: in utero embryonic development (GO:0001701);; Cellular Component: ruffle (GO:0001726);; Biological Process: receptor recycling (GO:0001881);; Biological Process: regulation of protein…	K04575|8.7e-173|crg:105327937|K04575 amyotrophic lateral sclerosis 2 protein | (RefSeq) alsin isoform X1	alsin isoform X1 [Crassostrea gigas]
Cg03073	0	1.25857	-3.5277	1.52962e-14	down	--	--	uncharacterized protein LOC117685919 isoform X1 [Crassostrea gigas]
Cg22577	10.0543	2.73955	1.78947	3.83197e-31	up	Molecular Function: magnesium ion transmembrane transporter activity (GO:0015095);; Cellular Component: integral component of membrane (GO:0016021);; Molecular Function: palmitoyltransferase activity (GO:0016409);;	--	leucine-rich repeat-containing protein 72 [Crassostrea gigas]
Crassostrea_gigas_newGene_15140	12.2802	3.40758	1.66485	2.20024e-10	up	Molecular Function: zinc ion binding (GO:0008270);;	K08285|4.0e-09|crg:109621067|K08285 midline 1 [EC:2.3.2.27] | (RefSeq) E3 ubiquitin-protein ligase Midline-1-like	probable E3 ubiquitin-protein ligase MID2 [Crassostrea gigas]
Cg00416	0.0160585	3.64075	-4.43992	6.40548e-28	down	Molecular Function: peptidyl-prolyl cis-trans isomerase activity (GO:0003755);;	--	uncharacterized protein LOC111104925 [Crassostrea virginica]
Cg17285	0.360692	2.25705	-1.53272	0.00222041	down	--	K05204|3.1e-52|sanh:107676315|K05204 glutamate receptor, ionotropic kainate 4 | (RefSeq) uncharacterized protein LOC107676315	uncharacterized protein LOC117683851 isoform X10 [Crassostrea gigas]
Crassostrea_gigas_newGene_11013	2.58586	0.797868	1.482	3.16995e-07	up	Molecular Function: zinc ion binding (GO:0008270);;	K12035|1.2e-48|crg:105317084|K12035 tripartite motif-containing protein 71 [EC:2.3.2.27] | (RefSeq) uncharacterized protein LOC105317084	uncharacterized protein LOC109619815 [Crassostrea gigas]
Cg17323	1.06122	28.9937	-2.15545	1.17422e-05	down	Molecular Function: carbohydrate binding (GO:0030246);;	K23284|2.6e-19|crg:105338226|K23284 C1q-related factor | (RefSeq) uncharacterized protein LOC105338226	latrophilin Cirl-like [Crassostrea gigas]
Cg19714	19.4659	8.16801	1.05174	0.00355062	up	Cellular Component: integral component of membrane (GO:0016021);;	--	cell wall protein DAN4 [Crassostrea gigas]
Crassostrea_gigas_newGene_11395	4.16908	0.754504	1.99417	1.36919e-07	up	Molecular Function: molecular_function (GO:0003674);; Molecular Function: receptor binding (GO:0005102);; Molecular Function: binding (GO:0005488);; Molecular Function: protein binding (GO:0005515);; Cellular Component: cellular_component (GO:0005575);; Cellular Component: intracellular (GO:0005622);; Cellular Component: cell (GO:0005623);; Cellular Component: nucleus (GO:0005634);; Cellular Comp…	K17592|0.0e+00|nve:5519666|K17592 sacsin | (RefSeq) sacsin	sacsin-like isoform X1 [Crassostrea gigas]
Cg27603	0.219207	6.14723	-1.38892	0.0061168	down	Biological Process: cell morphogenesis (GO:0000902);; Biological Process: cell morphogenesis involved in differentiation (GO:0000904);; Biological Process: regulation of cell growth (GO:0001558);; Biological Process: system process (GO:0003008);; Molecular Function: molecular_function (GO:0003674);; Molecular Function: receptor binding (GO:0005102);; Molecular Function: integrin binding (GO:00051…	K10104|3.3e-135|crg:105329191|K10104 ficolin | (RefSeq) ryncolin-4 isoform X2	fibroleukin isoform X1 [Crassostrea gigas]
Cg22513	0.59515	14.6991	-3.63107	9.29167e-23	down	Cellular Component: integral component of membrane (GO:0016021);;	K17341|1.8e-99|myi:110461058|K17341 hemicentin | (RefSeq) hemicentin-1-like	hemicentin-1 isoform X1 [Crassostrea gigas]
Cg29336	10.2001	4.11717	1.04551	0.00990531	up	--	--	sarcoplasmic calcium-binding protein-like [Crassostrea gigas]
Crassostrea_gigas_newGene_6713	0.324331	3.67633	-2.88014	2.0191e-16	down	--	K21871|6.4e-49|dre:101882062|K21871 M-phase phosphoprotein 8 | (RefSeq) uncharacterized protein LOC101882062 isoform X1	uncharacterized protein LOC117682988 isoform X1 [Crassostrea gigas]
Cg06921	1.41073	0.126469	2.75682	6.77077e-14	up	Molecular Function: protein-glutamine gamma-glutamyltransferase activity (GO:0003810);; Biological Process: peptide cross-linking (GO:0018149);;	K05619|0.0e+00|crg:105344073|K05619 transglutaminase 1 [EC:2.3.2.13] | (RefSeq) coagulation factor XIII A chain	coagulation factor XIII A chain [Crassostrea gigas]
Cg22030	1.97126	4.03802	-1.00009	2.64882e-05	down	--	K11997|3.2e-07|crg:105317984|K11997 tripartite motif-containing protein 2/3 | (RefSeq) uncharacterized protein LOC105317984	uncharacterized protein LOC117331903 [Pecten maximus]
Cg08355	4.93565	0.200717	2.48801	2.30462e-07	up	Molecular Function: calcium ion binding (GO:0005509);; Cellular Component: extracellular region (GO:0005576);; Cellular Component: collagen trimer (GO:0005581);; Biological Process: lipid transport (GO:0006869);; Molecular Function: lipid binding (GO:0008289);; Biological Process: lipoprotein metabolic process (GO:0042157);;	K06238|4.7e-28|myi:110457451|K06238 collagen type VI alpha | (RefSeq) uncharacterized protein LOC110457451 isoform X1	uncharacterized protein LOC105334524 isoform X2 [Crassostrea gigas]
Cg17185	2.79933	5.88087	-1.05765	1.21518e-09	down	Molecular Function: ATP binding (GO:0005524);;	K20098|0.0e+00|crg:105346383|K20098 DNA excision repair protein ERCC-6-like 2 [EC:3.6.4.-] | (RefSeq) DNA excision repair protein ERCC-6-like 2	DNA excision repair protein ERCC-6-like 2 isoform X1 [Crassostrea gigas]
Cg29852	66.2759	0	7.51165	2.16564e-85	up	Cellular Component: integral component of membrane (GO:0016021);;	--	interferon alpha-inducible protein 27-like protein 2B [Crassostrea gigas]
Crassostrea_gigas_newGene_7696	4.04929	8.93595	-1.10973	2.63184e-08	down	Cellular Component: integral component of membrane (GO:0016021);;	--	LOW QUALITY PROTEIN: VWFA and cache domain-containing protein 1-like [Crassostrea gigas]
Cg30430	111.083	0.0416931	2.32302	1.29579e-06	up	Molecular Function: arylformamidase activity (GO:0004061);; Cellular Component: integral component of membrane (GO:0016021);; Biological Process: tryptophan catabolic process to kynurenine (GO:0019441);;	--	isatin hydrolase-like [Crassostrea gigas]
Cg29182	3.40147	0	5.72666	3.25008e-46	up	--	--	uncharacterized protein LOC117683928 [Crassostrea gigas]
Cg18867	0.0350827	0.756734	-2.2219	3.99224e-06	down	--	--	uncharacterized protein LOC105319123 isoform X1 [Crassostrea gigas]
Cg18665	2.72005	0.33606	2.42158	3.26762e-11	up	Molecular Function: nucleic acid binding (GO:0003676);;	K10054|3.2e-23|cmk:103190730|K10054 probable transcription factor PML | (RefSeq) protein PML-like	uncharacterized protein LOC117688811 [Crassostrea gigas]
Crassostrea_gigas_newGene_11728	1.27474	0.168614	1.98574	1.16249e-05	up	Cellular Component: ubiquitin ligase complex (GO:0000151);; Molecular Function: molecular_function (GO:0003674);; Molecular Function: ubiquitin-protein transferase activity (GO:0004842);; Molecular Function: binding (GO:0005488);; Molecular Function: protein binding (GO:0005515);; Cellular Component: cellular_component (GO:0005575);; Cellular Component: intracellular (GO:0005622);; Cellular Compo…	--	uncharacterized protein LOC117688789 [Crassostrea gigas]
Crassostrea_gigas_newGene_11911	0.950521	2.54149	-1.24075	6.31099e-06	down	Molecular Function: transmembrane signaling receptor activity (GO:0004888);; Molecular Function: extracellular ligand-gated ion channel activity (GO:0005230);; Cellular Component: integral component of membrane (GO:0016021);;	K04811|6.0e-131|myi:110462572|K04811 nicotinic acetylcholine receptor alpha-10 | (RefSeq) uncharacterized protein LOC110462572	neuronal acetylcholine receptor subunit alpha-10-like [Crassostrea gigas]
Cg05691	1.31094	3.26781	-1.16142	0.000712541	down	--	--	uncharacterized protein LOC105325263 isoform X2 [Crassostrea gigas]
Cg28685	1.21281	0.583199	1.00133	1.46452e-13	up	Molecular Function: G-protein coupled receptor activity (GO:0004930);; Cellular Component: integral component of membrane (GO:0016021);;	K08469|0.0e+00|crg:105337852|K08469 G protein-coupled receptor 158 | (RefSeq) probable G-protein coupled receptor CG31760	probable G-protein coupled receptor CG31760 [Crassostrea gigas]
Cg19264	8.24967	3.28687	1.26549	6.58841e-19	up	Cellular Component: integral component of membrane (GO:0016021);; Molecular Function: protein-cysteine S-palmitoyltransferase activity (GO:0019706);;	K18932|1.6e-148|crg:105335528|K18932 palmitoyltransferase [EC:2.3.1.225] | (RefSeq) probable palmitoyltransferase ZDHHC21 isoform X1	probable palmitoyltransferase ZDHHC21 isoform X2 [Crassostrea gigas]
Cg12541	1.66903	0.731249	1.00199	0.00408466	up	Molecular Function: G-protein coupled receptor activity (GO:0004930);; Cellular Component: integral component of membrane (GO:0016021);;	K04145|2.6e-269|crg:105331744|K04145 dopamine receptor D2 | (RefSeq) uncharacterized protein LOC105331744	uncharacterized protein LOC105331744 [Crassostrea gigas]
Crassostrea_gigas_newGene_4706	0.315991	0.946661	-1.42459	4.69973e-07	down	Molecular Function: zinc ion binding (GO:0008270);;	K11997|0.0e+00|crg:105348424|K11997 tripartite motif-containing protein 2/3 | (RefSeq) tripartite motif-containing protein 3	E3 ubiquitin-protein ligase TRIM71-like [Crassostrea gigas]
Crassostrea_gigas_newGene_13694	3.44082	0.50643	2.32405	5.0011e-13	up	Molecular Function: metalloendopeptidase activity (GO:0004222);; Molecular Function: ATP binding (GO:0005524);;	K08955|1.4e-177|crg:105335008|K08955 ATP-dependent metalloprotease [EC:3.4.24.-] | (RefSeq) ATP-dependent zinc metalloprotease YME1L1-like	ATP-dependent zinc metalloprotease YME1L1 [Crassostrea gigas]
Cg20788	3.24496	11.0818	-1.44879	0.000268926	down	Biological Process: MyD88-dependent toll-like receptor signaling pathway (GO:0002755);; Biological Process: positive regulation of I-kappaB kinase/NF-kappaB signaling (GO:0043123);; Molecular Function: TIR domain binding (GO:0070976);;	--	myeloid differentiation primary response protein MyD88 [Crassostrea gigas]
Cg24721	2.10771	0.305722	2.56094	7.78329e-33	up	Cellular Component: integral component of membrane (GO:0016021);;	--	uncharacterized protein LOC105341886 [Crassostrea gigas]
Cg00347	0.592656	0.0668523	1.44231	0.00521431	up	--	K19983|1.2e-64|crg:105348115|K19983 exocyst complex component 1 | (RefSeq) uncharacterized protein LOC105348115	uncharacterized protein LOC111107837 isoform X1 [Crassostrea virginica]
Crassostrea_gigas_newGene_4241	1.53014	0.302983	1.66594	0.000196925	up	--	K10408|1.2e-16|crg:105320062|K10408 dynein heavy chain, axonemal | (RefSeq) dynein heavy chain domain-containing protein 1	unnamed protein product [Mytilus coruscus]
Cg02127	4.71201	0	8.1973	2.84427e-138	up	--	--	uncharacterized protein LOC117692682 [Crassostrea gigas]
Crassostrea_gigas_newGene_1271	44.493	19.0918	1.25797	1.22224e-32	up	Molecular Function: zinc ion binding (GO:0008270);;	K11997|7.1e-269|crg:105332950|K11997 tripartite motif-containing protein 2/3 | (RefSeq) tripartite motif-containing protein 55-like isoform X2	uncharacterized protein LOC105339745 isoform X2 [Crassostrea gigas]
Crassostrea_gigas_newGene_8090	0	1.20813	-3.05802	9.50173e-11	down	--	--	uncharacterized protein LOC117692887 isoform X2 [Crassostrea gigas]
Cg22945	0.545941	2.30476	-1.75363	8.10623e-07	down	Cellular Component: integral component of membrane (GO:0016021);;	K10798|2.2e-32|cin:100186084|K10798 poly [ADP-ribose] polymerase 2/3/4 [EC:2.4.2.30] | (RefSeq) VWFA and cache domain-containing protein 1-like	VWFA and cache domain-containing protein 1 [Crassostrea gigas]
Cg07519	0.705891	14.3888	-1.96601	7.67404e-05	down	Cellular Component: integral component of membrane (GO:0016021);;	K23400|8.4e-14|myi:110450139|K23400 doublecortin domain-containing protein 1 | (RefSeq) uncharacterized protein LOC110450139	uncharacterized protein LOC105329133 [Crassostrea gigas]
Cg20002	77.7457	31.1858	1.22717	9.34489e-09	up	Cellular Component: intracellular membrane-bounded organelle (GO:0043231);; Molecular Function: 2 iron, 2 sulfur cluster binding (GO:0051537);;	K23882|3.2e-69|crg:105335777|K23882 CDGSH iron-sulfur domain-containing protein 2 | (RefSeq) CDGSH iron-sulfur domain-containing protein 2	CDGSH iron-sulfur domain-containing protein 2 [Crassostrea gigas]
Cg20042	1.10043	4.52946	-1.61157	6.50568e-05	down	Molecular Function: zinc ion binding (GO:0008270);;	K19930|5.7e-26|lhu:105679516|K19930 SRC kinase signaling inhibitor 1 | (RefSeq) LOW QUALITY PROTEIN: uncharacterized protein LOC105679516	uncharacterized protein LOC105340876 [Crassostrea gigas]
Crassostrea_gigas_newGene_10545	0.485594	2.05322	-1.68147	2.2836e-05	down	Molecular Function: protein tyrosine phosphatase activity (GO:0004725);; Cellular Component: integral component of membrane (GO:0016021);;	K18033|1.8e-229|crg:105317817|K18033 receptor-type tyrosine-protein phosphatase epsilon [EC:3.1.3.48] | (RefSeq) receptor-type tyrosine-protein phosphatase C-like	receptor-type tyrosine-protein phosphatase epsilon [Crassostrea gigas]
Cg14011	0.542161	0.189229	1.26575	0.000517557	up	Molecular Function: calcium ion binding (GO:0005509);; Cellular Component: integral component of membrane (GO:0016021);;	K06233|0.0e+00|crg:105320898|K06233 low density lipoprotein-related protein 2 | (RefSeq) LOW QUALITY PROTEIN: low-density lipoprotein receptor-related protein 2-like	low-density lipoprotein receptor-related protein 2-like [Crassostrea gigas]
Cg25525	1.24178	3.00534	-1.25755	9.22085e-14	down	Molecular Function: chitin synthase activity (GO:0004100);; Cellular Component: integral component of membrane (GO:0016021);;	K00698|0.0e+00|crg:105341371|K00698 chitin synthase [EC:2.4.1.16] | (RefSeq) uncharacterized protein LOC105341371	chitin synthase chs-2 isoform X1 [Crassostrea gigas]
Cg10315	0.0332142	32.627	-7.89709	5.20933e-182	down	Molecular Function: calcium ion binding (GO:0005509);; Cellular Component: plasma membrane (GO:0005886);; Biological Process: homophilic cell adhesion via plasma membrane adhesion molecules (GO:0007156);; Cellular Component: integral component of membrane (GO:0016021);;	K13963|2.0e-71|nle:100602073|K13963 serpin B | (RefSeq) serpin B4 isoform X1	serpin B6-like [Crassostrea gigas]
Cg01080	0.612542	0	4.39118	7.98017e-25	up	--	K06776|3.2e-100|crg:105328169|K06776 receptor-type tyrosine-protein phosphatase kappa [EC:3.1.3.48] | (RefSeq) receptor-type tyrosine-protein phosphatase epsilon	multiple epidermal growth factor-like domains protein 10 isoform X10 [Crassostrea gigas]
Cg24047	18.7904	108.26	-1.39347	0.00669156	down	--	K23284|5.8e-21|crg:105326753|K23284 C1q-related factor | (RefSeq) collagen alpha-2(VIII) chain	complement C1q-like protein 4 [Crassostrea gigas]
Cg12862	0.378006	0.852517	-1.02646	0.00234053	down	Molecular Function: protein tyrosine phosphatase activity (GO:0004725);; Cellular Component: integral component of membrane (GO:0016021);;	K18033|3.3e-56|crg:105341828|K18033 receptor-type tyrosine-protein phosphatase epsilon [EC:3.1.3.48] | (RefSeq) receptor-type tyrosine-protein phosphatase epsilon-like	uncharacterized protein LOC105337813 [Crassostrea gigas]
Cg00236	5.88757	13.6355	-1.17855	1.43461e-08	down	Cellular Component: integral component of membrane (GO:0016021);;	--	uncharacterized protein LOC105346636 isoform X1 [Crassostrea gigas]
Cg14688	6.00466	0.324418	1.7307	0.000568884	up	Cellular Component: integral component of membrane (GO:0016021);;	--	uncharacterized protein LOC105321062 [Crassostrea gigas]
Crassostrea_gigas_newGene_13913	4.08557	0.0329411	3.69692	6.38918e-16	up	--	--	uncharacterized protein LOC111115261 [Crassostrea virginica]
Cg17967	2.93311	1.22879	1.14027	3.22804e-06	up	Molecular Function: 3-beta-hydroxy-delta5-steroid dehydrogenase activity (GO:0003854);; Biological Process: steroid biosynthetic process (GO:0006694);; Cellular Component: integral component of membrane (GO:0016021);;	K07748|2.0e-42|aqu:100641976|K07748 sterol-4alpha-carboxylate 3-dehydrogenase (decarboxylating) [EC:1.1.1.170] | (RefSeq) sterol-4-alpha-carboxylate 3-dehydrogenase, decarboxylating-like	short-chain dehydrogenase/reductase family 42E member 1 [Crassostrea gigas]
Crassostrea_gigas_newGene_4998	1.21248	0.0926186	2.05157	2.85388e-05	up	Molecular Function: nucleic acid binding (GO:0003676);; Biological Process: DNA integration (GO:0015074);;	K13356|1.2e-110|nvi:100117878|K13356 alcohol-forming fatty acyl-CoA reductase [EC:1.2.1.84] | (RefSeq) putative fatty acyl-CoA reductase CG5065 isoform X1	uncharacterized protein LOC117686123 [Crassostrea gigas]
Cg12314	2.48185	0.585195	1.3461	0.00621344	up	Molecular Function: calcium ion binding (GO:0005509);;	--	PHD finger protein 24 [Crassostrea gigas]
Cg22503	0.866747	20.8464	-4.01818	1.98325e-42	down	Cellular Component: integral component of membrane (GO:0016021);;	K17341|9.3e-44|myi:110461058|K17341 hemicentin | (RefSeq) hemicentin-1-like	hemicentin-1 isoform X1 [Crassostrea gigas]
Cg29565	18.2686	7.97448	1.07539	5.88785e-05	up	--	--	uncharacterized protein LOC105349063 isoform X2 [Crassostrea gigas]
Crassostrea_gigas_newGene_9556	0.506365	1.97175	-1.72293	6.98141e-08	down	--	--	uncharacterized protein LOC105331616 isoform X2 [Crassostrea gigas]
Crassostrea_gigas_newGene_1919	1.72516	8.03601	-1.90834	1.15497e-22	down	Cellular Component: integral component of membrane (GO:0016021);;	K13297|1.7e-42|crg:105322070|K13297 receptor-type tyrosine-protein phosphatase T [EC:3.1.3.48] | (RefSeq) uncharacterized protein LOC105322070	multiple epidermal growth factor-like domains protein 10 [Crassostrea gigas]
Cg17499	16.4517	7.07926	1.16162	2.65916e-19	up	--	K19936|1.6e-24|tng:GSTEN00035759G001|K19936 visinin-like protein 1 | (RefSeq) unnamed protein product	ankyrin repeat domain-containing protein 66 isoform X1 [Crassostrea gigas]
Cg09357	1.57266	7.93282	-1.85599	2.84045e-06	down	Biological Process: protein polyubiquitination (GO:0000209);; Molecular Function: protease binding (GO:0002020);; Biological Process: positive regulation of antimicrobial peptide production (GO:0002225);; Biological Process: regulation of immune system process (GO:0002682);; Biological Process: positive regulation of immune system process (GO:0002684);; Biological Process: regulation of immune ef…	K16060|2.4e-87|crg:105323879|K16060 baculoviral IAP repeat-containing protein 2/3 | (RefSeq) baculoviral IAP repeat-containing protein 7	putative inhibitor of apoptosis [Crassostrea gigas]
Cg25050	0.177858	6.09613	-4.30207	7.64507e-41	down	Molecular Function: protein binding (GO:0005515);;	K12035|0.0e+00|crg:105344585|K12035 tripartite motif-containing protein 71 [EC:2.3.2.27] | (RefSeq) uncharacterized protein LOC105344585 isoform X1	uncharacterized protein LOC105344585 isoform X1 [Crassostrea gigas]
Crassostrea_gigas_newGene_16554	0.153797	1.59619	-2.02967	1.86773e-05	down	Molecular Function: zinc ion binding (GO:0008270);;	K11997|7.8e-234|crg:105323897|K11997 tripartite motif-containing protein 2/3 | (RefSeq) uncharacterized protein LOC105323897	uncharacterized protein LOC105337743 [Crassostrea gigas]
Cg13732	0.0324663	1.70106	-2.53517	1.34609e-07	down	Cellular Component: integral component of membrane (GO:0016021);;	--	hemicentin-1 [Crassostrea gigas]
Cg20257	0.0370582	0.743329	-3.34332	2.42061e-20	down	--	--	uncharacterized protein LOC105322452 [Crassostrea gigas]
Cg21475	2.70206	0.611922	1.85457	1.50442e-09	up	--	--	histone chaperone RTT106 [Crassostrea gigas]
Cg30639	24.7236	4.06312	2.3505	2.47047e-19	up	Biological Process: signal transduction (GO:0007165);; Molecular Function: kinase activity (GO:0016301);; Molecular Function: binding, bridging (GO:0060090);;	K16551|2.1e-52|myi:110452281|K16551 A-kinase anchor protein 9 | (RefSeq) A-kinase anchor protein 9-like isoform X1	A-kinase anchor protein 9 isoform X13 [Crassostrea gigas]
Cg19213	15.9712	3.61572	1.96947	7.90838e-18	up	Molecular Function: ATPase activator activity (GO:0001671);; Molecular Function: metal ion binding (GO:0046872);; Molecular Function: chaperone binding (GO:0051087);; Biological Process: protein maturation by iron-sulfur cluster transfer (GO:0097428);;	K08852|1.7e-11|aplc:110986593|K08852 serine/threonine-protein kinase/endoribonuclease IRE1 [EC:2.7.11.1 3.1.26.-] | (RefSeq) uncharacterized protein LOC110986593 isoform X1	N-lysine methyltransferase KMT5A [Crassostrea gigas]
Crassostrea_gigas_newGene_5289	0.129377	0.931574	-1.74132	0.000253698	down	--	K12843|1.9e-07|crg:105338485|K12843 U4/U6 small nuclear ribonucleoprotein PRP3 | (RefSeq) uncharacterized protein LOC105338485	--
Cg01475	0.930605	0.163038	1.63986	0.000612667	up	Molecular Function: zinc ion binding (GO:0008270);;	K19930|4.7e-26|lhu:105679516|K19930 SRC kinase signaling inhibitor 1 | (RefSeq) LOW QUALITY PROTEIN: uncharacterized protein LOC105679516	uncharacterized protein LOC105327888 [Crassostrea gigas]
Crassostrea_gigas_newGene_8559	0.660551	2.42632	-1.43809	0.00192354	down	--	--	uncharacterized protein LOC117686330 [Crassostrea gigas]
Cg11015	1.58018	5.75919	-1.5486	4.46222e-05	down	Molecular Function: zinc ion binding (GO:0008270);; Cellular Component: integral component of membrane (GO:0016021);;	K11997|2.3e-30|myi:110459999|K11997 tripartite motif-containing protein 2/3 | (RefSeq) uncharacterized protein LOC110459999 isoform X1	uncharacterized protein LOC117682453 isoform X1 [Crassostrea gigas]
Cg13516	0.0674132	8.08252	-3.62047	5.77819e-16	down	--	--	uncharacterized protein LOC105336537 isoform X3 [Crassostrea gigas]
Cg22414	0.0103592	3.58335	-1.6754	0.000757044	down	--	--	uncharacterized protein LOC117681244 [Crassostrea gigas]
Crassostrea_gigas_newGene_2293	2.98355	0.311242	2.4716	6.21106e-10	up	--	--	uncharacterized protein LOC117686913 [Crassostrea gigas]
Cg04078	0.204186	0.836766	-1.84272	7.81495e-12	down	--	--	uncharacterized protein LOC109619097 isoform X2 [Crassostrea gigas]
Cg16432	10.7903	1.41886	2.29034	3.92032e-09	up	Molecular Function: calcium ion binding (GO:0005509);; Cellular Component: plasma membrane (GO:0005886);; Biological Process: homophilic cell adhesion via plasma membrane adhesion molecules (GO:0007156);; Cellular Component: integral component of membrane (GO:0016021);;	K17353|1.4e-28|crg:105322031|K17353 tetraspanin-18 | (RefSeq) tetraspanin-1	uncharacterized protein LOC105330843 isoform X1 [Crassostrea gigas]
Cg06693	7.86109	3.1269	1.16947	6.83878e-05	up	Molecular Function: D-amino-acid oxidase activity (GO:0003884);; Biological Process: D-amino acid metabolic process (GO:0046416);; Molecular Function: FAD binding (GO:0071949);;	K00272|2.7e-154|crg:105339443|K00272 D-aspartate oxidase [EC:1.4.3.1] | (RefSeq) D-aspartate oxidase isoform X1	D-aspartate oxidase [Crassostrea gigas]
Cg12879	0.997363	2.72113	-1.16548	0.00456832	down	Molecular Function: metalloendopeptidase activity (GO:0004222);; Molecular Function: metal ion binding (GO:0046872);;	K18156|1.1e-142|crg:105325983|K18156 mitochondrial inner membrane protease ATP23 [EC:3.4.24.-] | (RefSeq) mitochondrial inner membrane protease ATP23 homolog	mitochondrial inner membrane protease ATP23 homolog [Crassostrea gigas]
Cg06426	3.28256	0.281695	2.66325	4.11283e-12	up	Molecular Function: transmembrane signaling receptor activity (GO:0004888);; Biological Process: cell surface receptor signaling pathway (GO:0007166);; Cellular Component: integral component of membrane (GO:0016021);;	K08467|2.2e-77|crg:105326494|K08467 G protein-coupled receptor 157 | (RefSeq) probable G-protein coupled receptor 157	G-protein coupled receptor 157-like isoform X1 [Crassostrea gigas]
Crassostrea_gigas_newGene_7415	0	7.43872	-1.34199	0.00663673	down	--	--	uncharacterized protein LOC109618518 isoform X2 [Crassostrea gigas]
Cg00357	3.14369	0.0801781	1.70336	0.000523747	up	--	K06776|1.5e-78|crg:105346217|K06776 receptor-type tyrosine-protein phosphatase kappa [EC:3.1.3.48] | (RefSeq) receptor-type tyrosine-protein phosphatase epsilon	multiple epidermal growth factor-like domains protein 10 isoform X4 [Crassostrea gigas]
Cg14966	2.38746	0.622417	1.63086	7.27119e-07	up	Molecular Function: iron ion binding (GO:0005506);; Biological Process: lipid biosynthetic process (GO:0008610);; Cellular Component: integral component of membrane (GO:0016021);; Molecular Function: oxidoreductase activity (GO:0016491);;	--	uncharacterized protein LOC105324943 isoform X1 [Crassostrea gigas]
Cg24962	0.146447	1.356	-2.33958	1.49558e-08	down	Molecular Function: monooxygenase activity (GO:0004497);; Molecular Function: iron ion binding (GO:0005506);; Cellular Component: integral component of membrane (GO:0016021);; Molecular Function: oxidoreductase activity, acting on paired donors, with incorporation or reduction of molecular oxygen (GO:0016705);; Molecular Function: heme binding (GO:0020037);;	K07418|5.3e-80|myi:110454048|K07418 cytochrome P450 family 2 subfamily J [EC:1.14.14.1 1.14.14.73 1.14.14.74 1.14.14.75] | (RefSeq) cytochrome P450 2J2-like	cytochrome P450 2B19 [Crassostrea gigas]
Cg23976	11.7868	5.28123	1.09849	2.49015e-12	up	Molecular Function: zinc ion binding (GO:0008270);;	--	uncharacterized protein LOC105340995 isoform X2 [Crassostrea gigas]
Crassostrea_gigas_newGene_11861	1.25137	0.480058	1.22373	3.66874e-05	up	Molecular Function: calcium ion binding (GO:0005509);;	--	uncharacterized protein LOC105326292 [Crassostrea gigas]
Cg13115	0.330853	1.40689	-1.50189	0.000917313	down	Molecular Function: G-protein coupled receptor activity (GO:0004930);; Cellular Component: integral component of membrane (GO:0016021);;	K04145|2.7e-259|crg:105324398|K04145 dopamine receptor D2 | (RefSeq) D(2) dopamine receptor	D(2) dopamine receptor-like [Crassostrea virginica]
Crassostrea_gigas_newGene_15057	14.119	0.345734	3.87995	2.73009e-19	up	Molecular Function: calcium ion binding (GO:0005509);;	K23284|9.8e-07|crg:105320703|K23284 C1q-related factor | (RefSeq) complement C1q-like protein 3	heavy metal-binding protein HIP-like isoform X1 [Crassostrea gigas]
Cg27826	2.33608	0.770823	1.35136	6.92245e-05	up	Molecular Function: asparaginase activity (GO:0004067);; Biological Process: cellular amino acid metabolic process (GO:0006520);;	K13278|8.9e-312|crg:105318163|K13278 60kDa lysophospholipase [EC:3.1.1.5 3.1.1.47 3.5.1.1] | (RefSeq) L-asparaginase isoform X2	L-asparaginase [Crassostrea gigas]
Cg14839	2.69824	0.404647	1.80514	0.000122757	up	Biological Process: cell-matrix adhesion (GO:0007160);; Cellular Component: integral component of membrane (GO:0016021);;	K18273|4.9e-47|sfm:108936056|K18273 alpha-tectorin | (RefSeq) tecta; alpha-tectorin	protein mesh [Crassostrea gigas]
Cg10991	7.97473	18.917	-1.1249	0.000498827	down	Molecular Function: serine-type carboxypeptidase activity (GO:0004185);;	K09646|1.4e-254|crg:105346342|K09646 serine carboxypeptidase 1 [EC:3.4.16.-] | (RefSeq) retinoid-inducible serine carboxypeptidase	retinoid-inducible serine carboxypeptidase isoform X6 [Crassostrea gigas]
Cg29442	2.24697	8.08553	-1.59817	2.47227e-06	down	Cellular Component: extracellular region (GO:0005576);; Molecular Function: growth factor activity (GO:0008083);;	K05497|1.6e-85|myi:110449701|K05497 growth differentiation factor 8 | (RefSeq) growth/differentiation factor 8-like	uncharacterized protein LOC105337024 [Crassostrea gigas]
Cg12928	7.55801	2.5821	1.33827	4.15631e-05	up	Molecular Function: nucleic acid binding (GO:0003676);; Molecular Function: aspartic-type endopeptidase activity (GO:0004190);; Molecular Function: GTP binding (GO:0005525);; Biological Process: DNA integration (GO:0015074);;	K06065|8.0e-137|xma:102225078|K06065 nuclear receptor co-repressor 2 | (RefSeq) uncharacterized protein LOC102225078	uncharacterized protein LOC105343682 [Crassostrea gigas]
Cg26775	6.19306	2.24161	1.33578	6.10695e-08	up	--	--	uncharacterized protein KIAA0825 [Crassostrea gigas]
Cg09375	1.2158	2.48785	-1.0122	4.7618e-07	down	Molecular Function: zinc ion binding (GO:0008270);;	K23092|8.0e-18|adf:107358645|K23092 putative nucleotidyltransferase [EC:2.7.7.-] | (RefSeq) protein mab-21-like 2	uncharacterized protein LOC111102821 [Crassostrea virginica]
Cg25146	0.238458	3.61838	-2.06439	2.31079e-05	down	Molecular Function: scavenger receptor activity (GO:0005044);; Cellular Component: membrane (GO:0016020);; Cellular Component: integral component of membrane (GO:0016021);;	K18274|5.9e-30|xma:111608563|K18274 uromodulin | (RefSeq) uromodulin-like	deleted in malignant brain tumors 1 protein-like [Crassostrea virginica]
Crassostrea_gigas_newGene_15856	10.9577	0	8.17439	2.58913e-137	up	--	--	uncharacterized protein LOC111110929 isoform X1 [Crassostrea virginica]
Cg06442	56.4819	11.7488	1.39903	0.00521466	up	Molecular Function: calcium ion binding (GO:0005509);; Cellular Component: extracellular region (GO:0005576);; Biological Process: cell-matrix adhesion (GO:0007160);;	--	uncharacterized protein LOC105326485 [Crassostrea gigas]
Cg09343	3.2356	11.2572	-1.79457	4.92263e-56	down	--	K17341|1.1e-94|myi:110449963|K17341 hemicentin | (RefSeq) hemicentin-1-like	hemicentin-1 [Crassostrea gigas]
Cg04345	1.17151	0.419356	1.20628	0.0010394	up	Molecular Function: protein binding (GO:0005515);;	K17256|1.5e-47|myi:110451692|K17256 insulin-like growth factor-binding protein complex acid labile subunit | (RefSeq) carboxypeptidase N subunit 2-like	leucine-rich repeat-containing protein let-4 [Crassostrea gigas]
Cg14016	0.284679	2.58444	-2.30381	3.61343e-08	down	--	--	uncharacterized protein LOC105319600 isoform X1 [Crassostrea gigas]
Crassostrea_gigas_newGene_12208	4.91749	1.75836	1.46577	2.61921e-05	up	Molecular Function: calcium ion binding (GO:0005509);; Molecular Function: calcium-dependent phospholipid binding (GO:0005544);;	--	uncharacterized protein LOC105324030 isoform X2 [Crassostrea gigas]
Cg13484	0.579945	6.01917	-2.86834	1.50204e-19	down	--	--	uncharacterized protein LOC117683934 [Crassostrea gigas]
Cg29216	13.7523	0.472855	3.01436	4.44716e-11	up	--	--	uncharacterized protein LOC105320283 [Crassostrea gigas]
Cg25695	1.43924	4.44193	-1.27321	0.00284966	down	Molecular Function: zinc ion binding (GO:0008270);;	K19930|6.5e-28|lhu:105679516|K19930 SRC kinase signaling inhibitor 1 | (RefSeq) LOW QUALITY PROTEIN: uncharacterized protein LOC105679516	uncharacterized protein LOC117690146 [Crassostrea gigas]
Crassostrea_gigas_newGene_10215	4.02909	1.37902	1.35169	3.19468e-07	up	--	K07665|3.1e-30|api:107884559|K07665 two-component system, OmpR family, copper resistance phosphate regulon response regulator CusR | (RefSeq) uncharacterized protein LOC107884559	uncharacterized protein LOC105340995 isoform X3 [Crassostrea gigas]
Cg27800	0.008575	0.292061	-2.81414	9.50108e-10	down	Biological Process: telomere maintenance (GO:0000723);; Molecular Function: DNA helicase activity (GO:0003678);; Molecular Function: ATP binding (GO:0005524);; Biological Process: DNA repair (GO:0006281);; Biological Process: DNA recombination (GO:0006310);;	K15255|2.5e-116|mze:112433706|K15255 ATP-dependent DNA helicase PIF1 [EC:3.6.4.12] | (RefSeq) uncharacterized protein LOC112433706	uncharacterized protein LOC105336143 [Crassostrea gigas]
Cg11483	1.48455	3.48318	-1.19754	1.55216e-08	down	Molecular Function: RNA binding (GO:0003723);; Molecular Function: 5'-3' RNA helicase activity (GO:0032574);; Biological Process: posttranscriptional gene silencing by RNA (GO:0035194);;	K13983|2.6e-179|npr:108804828|K13983 putative helicase MOV10L1 [EC:3.6.4.13] | (RefSeq) MOV10L1; RNA helicase Mov10l1	RNA helicase Mov10l1 [Crassostrea gigas]
Cg06482	22.5927	6.27003	1.73277	1.22145e-19	up	--	--	uncharacterized protein LOC105319988 [Crassostrea gigas]
Cg00197	0.0157263	0.639482	-2.76615	2.6965e-09	down	Cellular Component: integral component of membrane (GO:0016021);;	K22375|0.0e+00|crg:105346420|K22375 E3 ubiquitin-protein ligase DCST1 [EC:2.3.2.27] | (RefSeq) DC-STAMP domain-containing protein 1-like	E3 ubiquitin-protein ligase DCST1-like isoform X1 [Crassostrea gigas]
Cg28684	22.8802	10.6535	1.06025	4.97599e-27	up	Molecular Function: calcium ion binding (GO:0005509);; Cellular Component: integral component of membrane (GO:0016021);;	K08648|1.2e-11|ccar:109049801|K08648 hyaluronan binding protein 2 [EC:3.4.21.-] | (RefSeq) hyaluronan-binding protein 2-like	uncharacterized protein LOC105337853 [Crassostrea gigas]
Cg11665	0.51732	1.1289	-1.02288	0.00142907	down	Cellular Component: ubiquitin ligase complex (GO:0000151);; Molecular Function: protein binding (GO:0005515);; Cellular Component: cellular_component (GO:0005575);; Cellular Component: intracellular (GO:0005622);; Cellular Component: cell (GO:0005623);; Cellular Component: cytoplasm (GO:0005737);; Cellular Component: microtubule organizing center (GO:0005815);; Cellular Component: cytosol (GO:000…	K10442|0.0e+00|crg:105344465|K10442 kelch-like protein 1/4/5 | (RefSeq) actin-binding protein IPP	kelch-like protein 28 [Crassostrea gigas]
Cg25226	0.267556	1.68423	-1.40036	0.00643406	down	Molecular Function: molecular_function (GO:0003674);; Molecular Function: catalytic activity (GO:0003824);; Molecular Function: nuclease activity (GO:0004518);; Molecular Function: deoxyribonuclease activity (GO:0004536);; Cellular Component: cellular_component (GO:0005575);; Cellular Component: intracellular (GO:0005622);; Cellular Component: cell (GO:0005623);; Cellular Component: nucleus (GO:0…	K03424|2.1e-47|npr:108786009|K03424 TatD DNase family protein [EC:3.1.21.-] | (RefSeq) TATDN2; putative deoxyribonuclease TATDN2	putative deoxyribonuclease TATDN2 isoform X2 [Crassostrea gigas]
Cg27228	4.29068	9.2432	-1.10214	8.73567e-12	down	--	--	uncharacterized protein LOC105333308 isoform X1 [Crassostrea gigas]
Cg08533	22.9633	2.13659	1.53058	0.00280988	up	Cellular Component: integral component of membrane (GO:0016021);; Molecular Function: oxidoreductase activity, acting on CH-OH group of donors (GO:0016614);; Molecular Function: flavin adenine dinucleotide binding (GO:0050660);;	K23284|9.6e-93|crg:105324341|K23284 C1q-related factor | (RefSeq) collagen alpha-1(X) chain-like	complement C1q-like protein 4 [Crassostrea gigas]
Crassostrea_gigas_newGene_12244	2.70213	7.28904	-1.43205	1.26245e-38	down	Cellular Component: integral component of membrane (GO:0016021);;	--	arrestin domain-containing protein 3-like [Crassostrea gigas]
Cg20410	16.4961	4.946	1.54193	1.12406e-07	up	Molecular Function: molecular_function (GO:0003674);; Molecular Function: binding (GO:0005488);; Molecular Function: protein binding (GO:0005515);; Cellular Component: cellular_component (GO:0005575);; Cellular Component: intracellular (GO:0005622);; Cellular Component: cell (GO:0005623);; Cellular Component: cytoplasm (GO:0005737);; Biological Process: protein folding (GO:0006457);; Biological P…	K09542|2.0e-85|crg:105343215|K09542 crystallin, alpha B | (RefSeq) alpha-crystallin A chain	alpha-crystallin A chain [Crassostrea gigas]
Crassostrea_gigas_newGene_11850	3.67488	12.0539	-1.42407	0.000194983	down	Cellular Component: integral component of membrane (GO:0016021);; Molecular Function: metal ion transmembrane transporter activity (GO:0046873);;	K14709|5.1e-153|crg:105346440|K14709 solute carrier family 39 (zinc transporter), member 1/2/3 | (RefSeq) zinc transporter ZIP1	zinc transporter ZIP1 [Crassostrea gigas]
Crassostrea_gigas_newGene_14733	0.905869	3.7223	-1.98302	1.77887e-29	down	Molecular Function: zinc ion binding (GO:0008270);;	K11997|4.2e-232|crg:105326056|K11997 tripartite motif-containing protein 2/3 | (RefSeq) tripartite motif-containing protein 55	tripartite motif-containing protein 3-like [Crassostrea gigas]
Cg21489	43.3226	15.1898	1.38938	5.76553e-10	up	Molecular Function: endoribonuclease activity (GO:0004521);; Cellular Component: integral component of membrane (GO:0016021);;	K19770|9.6e-13|loa:LOAG_13418|K19770 ribonuclease kappa [EC:3.1.-.-] | (RefSeq) hypothetical protein	ribonuclease kappa [Crassostrea gigas]
Cg13698	0.225615	4.36417	-2.47806	1.18853e-07	down	Molecular Function: molecular_function (GO:0003674);; Molecular Function: binding (GO:0005488);; Cellular Component: cellular_component (GO:0005575);; Cellular Component: extracellular region (GO:0005576);; Cellular Component: cell (GO:0005623);; Cellular Component: plasma membrane (GO:0005886);; Biological Process: response to stress (GO:0006950);; Biological Process: defense response (GO:000695…	K17341|5.8e-17|myi:110461058|K17341 hemicentin | (RefSeq) hemicentin-1-like	B-cell receptor CD22-like isoform X1 [Crassostrea gigas]
Cg11400	0	1.66055	-2.79572	5.22998e-09	down	Molecular Function: protein binding (GO:0005515);;	K08463|3.7e-33|myi:110456648|K08463 adhesion G-protein coupled receptor G6 | (RefSeq) plexin-B2-like isoform X1	plexin-B2-like [Crassostrea gigas]
Cg24697	2.83523	8.75103	-1.46042	4.20144e-06	down	--	--	uncharacterized protein LOC105328884 [Crassostrea gigas]
Cg12237	1.43756	0.465704	1.45252	3.44431e-08	up	--	--	uncharacterized protein LOC105344752 [Crassostrea gigas]
Cg28787	0.00687883	2.04685	-5.62436	1.66646e-57	down	Molecular Function: zinc ion binding (GO:0008270);;	K11997|2.5e-102|crg:109617221|K11997 tripartite motif-containing protein 2/3 | (RefSeq) uncharacterized protein LOC109617221	uncharacterized protein LOC105343882 [Crassostrea gigas]
Cg15150	2.8309	1.25338	1.018	0.00114283	up	--	K02366|3.5e-64|amex:111197650|K02366 glucuronyl/N-acetylglucosaminyl transferase EXT1 [EC:2.4.1.224 2.4.1.225] | (RefSeq) uncharacterized protein LOC111197650 isoform X1	uncharacterized protein LOC105338989 isoform X2 [Crassostrea gigas]
Cg03513	0.274274	0.992517	-1.44238	0.00053043	down	--	--	uncharacterized protein LOC105348848 isoform X1 [Crassostrea gigas]
Cg18175	10.3453	2.54559	1.89727	2.27506e-20	up	Cellular Component: cytoplasm (GO:0005737);; Molecular Function: dihydropyrimidine dehydrogenase (NADP+) activity (GO:0017113);; Biological Process: beta-alanine biosynthetic process (GO:0019483);; Molecular Function: 4 iron, 4 sulfur cluster binding (GO:0051539);;	K00207|0.0e+00|crg:105346767|K00207 dihydropyrimidine dehydrogenase (NADP+) [EC:1.3.1.2] | (RefSeq) dihydropyrimidine dehydrogenase [NADP(+)]	dihydropyrimidine dehydrogenase [NADP(+)] isoform X1 [Crassostrea gigas]
Crassostrea_gigas_newGene_5262	5.48938	35.7958	-1.84554	4.2192e-05	down	--	K10059|3.2e-58|crg:105347614|K10059 C-type lectin domain family 4 member E | (RefSeq) perlucin-like protein	perlucin-like protein isoform X6 [Crassostrea gigas]
Cg16649	1.34692	0	4.19539	2.08097e-20	up	Cellular Component: integral component of membrane (GO:0016021);;	K20051|4.2e-233|crg:105344512|K20051 low-density lipoprotein receptor-related protein 4 | (RefSeq) low-density lipoprotein receptor-related protein 2	low-density lipoprotein receptor-related protein 1B isoform X2 [Crassostrea gigas]
Cg20700	1.15672	3.60389	-1.38763	0.000177398	down	--	--	uncharacterized protein LOC105323036 isoform X3 [Crassostrea gigas]
Cg26707	6.95779	1.82258	1.81214	9.45454e-21	up	Cellular Component: Golgi membrane (GO:0000139);; Biological Process: protein glycosylation (GO:0006486);; Molecular Function: galactosyltransferase activity (GO:0008378);; Cellular Component: membrane (GO:0016020);; Cellular Component: integral component of membrane (GO:0016021);; Molecular Function: transferase activity, transferring glycosyl groups (GO:0016757);;	K02175|4.7e-220|crg:109620855|K02175 beta-1,3-galactosyltransferase / beta-1,3-N-acetylglucosaminyltransferase [EC:2.4.1.62 2.4.1.-] | (RefSeq) beta-1,3-galactosyltransferase 1-like	beta-1,3-galactosyltransferase 1 [Crassostrea gigas]
Cg02769	1.01165	8.74708	-1.6842	0.000772081	down	Molecular Function: cysteine-type peptidase activity (GO:0008234);;	K00741|5.8e-17|crg:109617586|K00741 N-acetyllactosaminide beta-1,3-N-acetylglucosaminyltransferase [EC:2.4.1.149] | (RefSeq) beta-1,3-galactosyltransferase 5-like	uncharacterized protein LOC105346606 [Crassostrea gigas]
Cg11463	2.5644	9.9171	-1.59743	3.28697e-05	down	Cellular Component: integral component of membrane (GO:0016021);;	--	uncharacterized protein LOC117682688 [Crassostrea gigas]
Cg18495	8.19308	24.9377	-1.19167	0.0096419	down	Molecular Function: fatty acid synthase activity (GO:0004312);; Biological Process: biosynthetic process (GO:0009058);; Molecular Function: oxidoreductase activity (GO:0016491);; Molecular Function: hydrolase activity, acting on ester bonds (GO:0016788);; Molecular Function: phosphopantetheine binding (GO:0031177);;	K00665|0.0e+00|crg:105338805|K00665 fatty acid synthase, animal type [EC:2.3.1.85] | (RefSeq) fatty acid synthase	LOW QUALITY PROTEIN: fatty acid synthase [Crassostrea gigas]
Cg21381	11.768	3.38703	1.61227	8.54396e-10	up	--	--	uncharacterized protein LOC105333429 [Crassostrea gigas]
Crassostrea_gigas_newGene_430	0.4318	7.56064	-3.41322	1.35342e-23	down	Molecular Function: metal ion binding (GO:0046872);;	--	uncharacterized protein LOC117688898 [Crassostrea gigas]
Crassostrea_gigas_newGene_2591	0.927977	0.440589	1.02356	0.00858663	up	--	--	uncharacterized protein LOC117683222 [Crassostrea gigas]
Crassostrea_gigas_newGene_4479	0.00424433	6.87055	-3.67361	1.25162e-15	down	Cellular Component: integral component of membrane (GO:0016021);;	--	uncharacterized protein LOC105326391 [Crassostrea gigas]
Cg00962	0.245602	2.50719	-2.61274	1.17297e-11	down	Molecular Function: protein tyrosine phosphatase activity (GO:0004725);; Biological Process: protein dephosphorylation (GO:0006470);; Cellular Component: integral component of membrane (GO:0016021);;	K13297|1.7e-268|crg:105344922|K13297 receptor-type tyrosine-protein phosphatase T [EC:3.1.3.48] | (RefSeq) receptor-type tyrosine-protein phosphatase T	receptor-type tyrosine-protein phosphatase epsilon [Crassostrea gigas]
Cg19863	0.436383	1.21594	-1.17755	0.0039888	down	Molecular Function: G-protein coupled receptor activity (GO:0004930);; Cellular Component: integral component of membrane (GO:0016021);;	K04233|1.8e-63|crg:105338060|K04233 allatostatin A receptor | (RefSeq) cholecystokinin receptor type A	neuromedin-U receptor 2-like [Crassostrea gigas]
Cg24706	0.112045	1.80459	-1.78579	0.000389153	down	Biological Process: formation of cytoplasmic translation initiation complex (GO:0001732);; Molecular Function: translation initiation factor activity (GO:0003743);; Cellular Component: eukaryotic translation initiation factor 3 complex (GO:0005852);; Cellular Component: eukaryotic 43S preinitiation complex (GO:0016282);; Cellular Component: eukaryotic 48S preinitiation complex (GO:0033290);;	K03254|4.6e-63|crg:105339951|K03254 translation initiation factor 3 subunit A | (RefSeq) eukaryotic translation initiation factor 3 subunit A	eukaryotic translation initiation factor 3 subunit A [Crassostrea gigas]
Cg13114	0.37027	1.46235	-1.50778	0.000354138	down	Molecular Function: G-protein coupled receptor activity (GO:0004930);; Biological Process: G-protein coupled receptor signaling pathway (GO:0007186);; Cellular Component: integral component of membrane (GO:0016021);;	--	alpha-2 adrenergic receptor-like [Crassostrea gigas]
Cg16473	10.3159	1.49725	2.04164	1.24552e-06	up	--	--	uncharacterized protein LOC105323876 isoform X1 [Crassostrea gigas]
Cg24544	0.995819	10.7115	-2.96535	7.82677e-21	down	Molecular Function: zinc ion binding (GO:0008270);; Molecular Function: N-acetylmuramoyl-L-alanine amidase activity (GO:0008745);; Biological Process: peptidoglycan catabolic process (GO:0009253);;	K01446|2.0e-45|dhe:111597008|K01446 peptidoglycan recognition protein | (RefSeq) peptidoglycan-recognition protein SC2-like	peptidoglycan-recognition protein SC2-like isoform X1 [Crassostrea gigas]
Cg23500	0.877888	1.9582	-1.00073	0.00703856	down	Cellular Component: integral component of membrane (GO:0016021);;	K11153|9.7e-44|pcan:112564926|K11153 retinol dehydrogenase 12 [EC:1.1.1.300] | (RefSeq) retinol dehydrogenase 12-like	uncharacterized protein LOC117689265 [Crassostrea gigas]
Cg15061	0.410828	1.32996	-1.52854	1.09948e-07	down	Molecular Function: transmembrane signaling receptor activity (GO:0004888);; Molecular Function: extracellular ligand-gated ion channel activity (GO:0005230);; Cellular Component: integral component of membrane (GO:0016021);;	K05312|1.2e-289|crg:105317317|K05312 nicotinic acetylcholine receptor, invertebrate | (RefSeq) neuronal acetylcholine receptor subunit alpha-10	neuronal acetylcholine receptor subunit alpha-10 [Crassostrea gigas]
Cg18917	0.30189	1.18023	-1.62219	1.76676e-05	down	Cellular Component: integral component of membrane (GO:0016021);;	K06240|1.8e-11|lak:106156244|K06240 laminin, alpha 3/5 | (RefSeq) laminin subunit alpha-1	uncharacterized protein LOC105331532 isoform X1 [Crassostrea gigas]
Cg13628	42.3188	0	9.03036	9.66059e-181	up	--	K01349|6.6e-16|crg:105320244|K01349 furin [EC:3.4.21.75] | (RefSeq) PC3-like endoprotease variant B isoform X2	PC3-like endoprotease variant B isoform X1 [Crassostrea gigas]
Cg06526	0.816046	3.10841	-1.78415	8.60076e-13	down	Molecular Function: glucose-6-phosphate isomerase activity (GO:0004347);; Biological Process: gluconeogenesis (GO:0006094);; Biological Process: glycolytic process (GO:0006096);;	K01810|2.9e-252|crg:105332305|K01810 glucose-6-phosphate isomerase [EC:5.3.1.9] | (RefSeq) glucose-6-phosphate isomerase	glucose-6-phosphate isomerase isoform X3 [Crassostrea gigas]
Cg27872	1.21824	0.403465	1.27815	0.000987521	up	Molecular Function: DNA binding (GO:0003677);;	--	uncharacterized protein LOC117687825 [Crassostrea gigas]
Cg26664	1.91417	11.9273	-2.25931	2.73424e-11	down	Cellular Component: integral component of membrane (GO:0016021);; Molecular Function: transmembrane transporter activity (GO:0022857);;	K08202|0.0e+00|crg:105327577|K08202 MFS transporter, OCT family, solute carrier family 22 (organic cation transporter), member 4/5 | (RefSeq) organic cation transporter-like protein	organic cation transporter-like protein [Crassostrea gigas]
Cg30533	0.931443	0	5.05241	8.27069e-34	up	Molecular Function: ATP binding (GO:0005524);; Cellular Component: integral component of membrane (GO:0016021);; Molecular Function: ATPase activity (GO:0016887);;	K21396|0.0e+00|crg:105333034|K21396 ATP-binding cassette, subfamily G (WHITE), eye pigment precursor transporter | (RefSeq) protein white isoform X1	protein white isoform X1 [Crassostrea gigas]
Cg20333	12.2375	5.92624	1.00148	1.47481e-22	up	Molecular Function: metal ion binding (GO:0046872);;	K14321|7.4e-150|crg:105347373|K14321 nucleoporin-like protein 2 | (RefSeq) nucleoporin-like protein 2 isoform X1	nucleoporin NUP42 isoform X1 [Crassostrea gigas]
Cg00825	0.947122	3.74081	-1.49411	0.000590812	down	--	K13297|5.0e-41|crg:105322070|K13297 receptor-type tyrosine-protein phosphatase T [EC:3.1.3.48] | (RefSeq) uncharacterized protein LOC105322070	multiple epidermal growth factor-like domains protein 6 isoform X3 [Crassostrea gigas]
Cg05701	5.70976	1.01264	2.2882	1.90507e-26	up	Molecular Function: thiamine diphosphokinase activity (GO:0004788);; Molecular Function: ATP binding (GO:0005524);; Biological Process: thiamine metabolic process (GO:0006772);; Biological Process: thiamine diphosphate biosynthetic process (GO:0009229);; Molecular Function: kinase activity (GO:0016301);; Molecular Function: thiamine binding (GO:0030975);;	K00949|2.1e-138|crg:105325377|K00949 thiamine pyrophosphokinase [EC:2.7.6.2] | (RefSeq) thiamin pyrophosphokinase 1	thiamin pyrophosphokinase 1 isoform X1 [Crassostrea gigas]
Crassostrea_gigas_newGene_13577	0.187507	2.29229	-1.5557	0.00240272	down	--	K06530|4.5e-18|lak:106170633|K06530 CD109 antigen | (RefSeq) CD109 antigen-like	uncharacterized protein LOC111101944 [Crassostrea virginica]
Cg29078	2.01342	0.1409	1.74897	0.000525929	up	Molecular Function: protein binding (GO:0005515);;	K21440|6.8e-62|crg:109617064|K21440 ankyrin repeat domain-containing protein 50 | (RefSeq) uncharacterized protein LOC109617064	uncharacterized protein LOC105328308 [Crassostrea gigas]
Cg03169	0.539655	1.3979	-1.25163	2.0688e-05	down	--	--	uncharacterized protein LOC105333276 [Crassostrea gigas]
Crassostrea_gigas_newGene_10886	0.196745	1.07471	-1.75978	4.14625e-05	down	--	--	uncharacterized protein LOC105343908 [Crassostrea gigas]
Cg11823	0	2.14964	-4.50014	1.75347e-26	down	--	--	uncharacterized protein LOC117686586 isoform X2 [Crassostrea gigas]
Cg15885	7.31345	2.81741	1.29462	3.83878e-13	up	Molecular Function: transmembrane signaling receptor activity (GO:0004888);; Molecular Function: extracellular ligand-gated ion channel activity (GO:0005230);; Cellular Component: integral component of membrane (GO:0016021);;	K04803|8.1e-103|myi:110442382|K04803 nicotinic acetylcholine receptor alpha-1 | (RefSeq) acetylcholine receptor subunit beta-like	acetylcholine receptor subunit beta [Crassostrea gigas]
Cg25663	4.59885	0.357612	2.16757	6.75368e-06	up	Molecular Function: zinc ion binding (GO:0008270);;	K12026|2.1e-223|crg:109618359|K12026 tripartite motif-containing protein 56 [EC:2.3.2.27] | (RefSeq) uncharacterized protein LOC109618359	uncharacterized protein LOC117690200 isoform X2 [Crassostrea gigas]
Cg14397	0.166467	0.911006	-2.08992	3.58852e-10	down	--	--	uncharacterized protein LOC105325840 [Crassostrea gigas]
Cg14629	7.93913	2.65804	1.47709	4.28368e-14	up	Molecular Function: argininosuccinate synthase activity (GO:0004055);; Molecular Function: ATP binding (GO:0005524);; Biological Process: arginine biosynthetic process (GO:0006526);;	K01940|2.3e-182|myi:110462019|K01940 argininosuccinate synthase [EC:6.3.4.5] | (RefSeq) argininosuccinate synthase-like	argininosuccinate synthase [Crassostrea gigas]
Cg04584	0.0592437	2.0164	-2.53012	1.20363e-07	down	Molecular Function: guanylate cyclase activity (GO:0004383);; Molecular Function: protein kinase activity (GO:0004672);; Molecular Function: ATP binding (GO:0005524);; Cellular Component: integral component of membrane (GO:0016021);; Biological Process: intracellular signal transduction (GO:0035556);;	K12323|1.1e-145|nve:5507623|K12323 atrial natriuretic peptide receptor A [EC:4.6.1.2] | (RefSeq) atrial natriuretic peptide receptor 1	uncharacterized protein LOC105333265 [Crassostrea gigas]
Crassostrea_gigas_newGene_12210	2.84149	0.381746	1.66489	0.000948762	up	Molecular Function: ubiquitin-protein transferase activity (GO:0004842);;	K22371|0.0e+00|crg:105340728|K22371 G2/M phase-specific E3 ubiquitin-protein ligase [EC:2.3.2.26] | (RefSeq) uncharacterized protein LOC105340728 isoform X3	uncharacterized protein LOC105340728 isoform X1 [Crassostrea gigas]
Cg15119	38.1698	11.4137	1.49308	8.97941e-06	up	Cellular Component: mitochondrial outer membrane (GO:0005741);; Biological Process: mitochondrial protein catabolic process (GO:0035694);;	K17388|2.7e-31|crg:105336327|K17388 Rho-associated protein kinase 2 [EC:2.7.11.1] | (RefSeq) uncharacterized protein LOC105336327	intracellular protein transport protein USO1 isoform X1 [Crassostrea gigas]
Crassostrea_gigas_newGene_4079	2.69999	0.338105	2.22296	2.72106e-07	up	--	--	uncharacterized protein LOC117686913 [Crassostrea gigas]
Cg24779	78.1085	20.5671	1.7815	2.70455e-15	up	Cellular Component: integral component of membrane (GO:0016021);;	--	annexin A7-like [Crassostrea gigas]
Cg18209	5.49409	2.3379	1.16635	6.17567e-14	up	Molecular Function: protein tyrosine kinase activity (GO:0004713);; Molecular Function: ATP binding (GO:0005524);;	K09935|3.3e-57|crg:105343212|K09935 uncharacterized protein | (RefSeq) uncharacterized protein LOC105343212	uncharacterized protein LOC105343244 [Crassostrea gigas]
Cg19301	0.717865	0.26437	1.29595	1.59325e-07	up	Cellular Component: integral component of membrane (GO:0016021);;	K06491|7.7e-25|tnl:113507337|K06491 neural cell adhesion molecule | (RefSeq) nephrin-like	uncharacterized protein LOC105340249 [Crassostrea gigas]
Cg05692	2.10635	6.48203	-1.49148	8.07939e-08	down	Molecular Function: molecular_function (GO:0003674);; Molecular Function: binding (GO:0005488);; Molecular Function: protein binding (GO:0005515);; Cellular Component: cellular_component (GO:0005575);; Cellular Component: intracellular (GO:0005622);; Cellular Component: cell (GO:0005623);; Cellular Component: cytoplasm (GO:0005737);; Biological Process: protein folding (GO:0006457);; Biological P…	--	uncharacterized protein LOC111135749 [Crassostrea virginica]
Cg12974	2.97229	0.294073	1.84795	0.000198842	up	Molecular Function: GTP binding (GO:0005525);;	K12026|6.1e-09|nve:5501811|K12026 tripartite motif-containing protein 56 [EC:2.3.2.27] | (RefSeq) tripartite motif-containing protein 45	interferon-induced protein 44-like [Crassostrea gigas]
Cg03129	4.01942	0.502676	1.55466	0.00238204	up	Molecular Function: nucleic acid binding (GO:0003676);; Molecular Function: DNA binding (GO:0003677);; Cellular Component: integral component of membrane (GO:0016021);;	K09228|5.5e-22|lak:106173271|K09228 KRAB domain-containing zinc finger protein | (RefSeq) zinc finger protein 235 isoform X1	uncharacterized protein LOC111114847 [Crassostrea virginica]
Crassostrea_gigas_newGene_7914	0	2.83507	-3.04752	1.19733e-10	down	Molecular Function: zinc ion binding (GO:0008270);;	K11997|3.2e-219|crg:105326056|K11997 tripartite motif-containing protein 2/3 | (RefSeq) tripartite motif-containing protein 55	tripartite motif-containing protein 3-like [Crassostrea gigas]
Cg08275	10.3607	0.243176	1.4523	0.00277121	up	--	K20186|3.4e-32|crg:105328377|K20186 biogenesis of lysosome-related organelles complex 1 subunit 3 | (RefSeq) biogenesis of lysosome-related organelles complex 1 subunit 3 isoform X1	uncharacterized protein LOC109618905 isoform X2 [Crassostrea gigas]
Cg23537	6.12069	2.2578	1.36536	6.36401e-17	up	--	K06058|0.0e+00|crg:105337511|K06058 deltex [EC:2.3.2.27] | (RefSeq) poly [ADP-ribose] polymerase 14-like	uncharacterized protein LOC105337511 isoform X1 [Crassostrea gigas]
Cg25683	0.125424	8.43131	-2.41386	6.74955e-07	down	--	--	uncharacterized protein LOC117691984 [Crassostrea gigas]
Cg04297	14.9448	0.747597	1.44265	0.00378852	up	--	--	proline-rich receptor-like protein kinase PERK1 [Crassostrea gigas]
Crassostrea_gigas_newGene_9486	2.13982	6.00406	-1.22925	0.00156882	down	Cellular Component: integral component of membrane (GO:0016021);;	--	--
Crassostrea_gigas_newGene_14938	2.77478	7.20699	-1.55266	5.83463e-09	down	--	--	uncharacterized protein YMR317W-like isoform X1 [Crassostrea gigas]
Cg04833	0.0258773	2.68313	-2.09098	2.31379e-05	down	Molecular Function: magnesium ion binding (GO:0000287);; Molecular Function: RNA binding (GO:0003723);; Molecular Function: phenylalanine-tRNA ligase activity (GO:0004826);; Molecular Function: ATP binding (GO:0005524);; Cellular Component: cytoplasm (GO:0005737);; Biological Process: phenylalanyl-tRNA aminoacylation (GO:0006432);;	--	cell wall protein DAN4-like [Crassostrea gigas]
Cg24423	1.51182	0.425987	1.34374	0.00226912	up	--	--	uncharacterized protein LOC105329010 isoform X2 [Crassostrea gigas]
Cg07598	0.86017	3.7749	-1.35206	0.00665395	down	Molecular Function: microtubule motor activity (GO:0003777);; Molecular Function: ATP binding (GO:0005524);; Biological Process: microtubule-based movement (GO:0007018);;	K10408|1.8e-50|crg:105320062|K10408 dynein heavy chain, axonemal | (RefSeq) dynein heavy chain domain-containing protein 1	PREDICTED: protein unc-13 homolog C-like [Branchiostoma belcheri]
Cg03692	1.77987	0.638773	1.30002	5.11574e-06	up	Cellular Component: integral component of membrane (GO:0016021);;	--	platelet endothelial aggregation receptor 1 isoform X4 [Crassostrea gigas]
Cg00004	0.0733198	0.578736	-1.88826	4.83399e-05	down	--	K01518|3.6e-09|aplc:110987942|K01518 bis(5'-nucleosidyl)-tetraphosphatase [EC:3.6.1.17] | (RefSeq) uncharacterized protein LOC110987942 isoform X1	uncharacterized protein LOC105322452 [Crassostrea gigas]
Cg23233	0.342251	4.51138	-2.72094	3.08565e-11	down	Molecular Function: transmembrane signaling receptor activity (GO:0004888);; Molecular Function: extracellular ligand-gated ion channel activity (GO:0005230);; Cellular Component: integral component of membrane (GO:0016021);;	K04808|1.2e-106|crg:109620758|K04808 nicotinic acetylcholine receptor alpha-6 | (RefSeq) neuronal acetylcholine receptor subunit alpha-6-like	neuronal acetylcholine receptor subunit alpha-3 [Crassostrea gigas]
Cg18337	2.22646	0.406216	1.9058	1.33631e-06	up	Cellular Component: integral component of membrane (GO:0016021);; Molecular Function: transmembrane transporter activity (GO:0022857);; Biological Process: transmembrane transport (GO:0055085);;	K08202|4.2e-133|myi:110458191|K08202 MFS transporter, OCT family, solute carrier family 22 (organic cation transporter), member 4/5 | (RefSeq) solute carrier family 22 member 4-like	solute carrier family 22 member 4-like [Crassostrea gigas]
Crassostrea_gigas_newGene_7853	2.37074	22.7171	-2.38107	1.57232e-08	down	Molecular Function: calcium ion binding (GO:0005509);; Molecular Function: calcium-dependent phospholipid binding (GO:0005544);; Biological Process: negative regulation of coagulation (GO:0050819);;	K17095|9.1e-29|crg:105335793|K17095 annexin A7/11 | (RefSeq) annexin A7	annexin A7 [Crassostrea gigas]
Cg30365	2.88299	7.39207	-1.34335	1.58913e-16	down	Molecular Function: zinc ion binding (GO:0008270);; Molecular Function: kinase activity (GO:0016301);;	K11997|4.1e-261|crg:109619606|K11997 tripartite motif-containing protein 2/3 | (RefSeq) uncharacterized protein LOC109619606	uncharacterized protein LOC105327789 [Crassostrea gigas]
Cg24599	5.1266	11.0254	-1.09448	1.41292e-10	down	Molecular Function: O-acyltransferase activity (GO:0008374);; Biological Process: cellular lipid metabolic process (GO:0044255);;	K00629|0.0e+00|crg:105327308|K00629 glycerol-3-phosphate O-acyltransferase 1/2 [EC:2.3.1.15] | (RefSeq) glycerol-3-phosphate acyltransferase 1, mitochondrial isoform X2	glycerol-3-phosphate acyltransferase 1, mitochondrial [Crassostrea gigas]
Cg15155	0.0497878	3.12397	-3.05476	4.57989e-11	down	Molecular Function: metalloendopeptidase activity (GO:0004222);;	--	mucin-2-like [Crassostrea gigas]
Cg30560	3.38186	0.708176	1.80657	1.40307e-06	up	--	--	uncharacterized protein LOC117685504 [Crassostrea gigas]
Cg30447	4.80324	2.27643	1.00384	4.53818e-08	up	Biological Process: cell adhesion (GO:0007155);; Biological Process: integrin-mediated signaling pathway (GO:0007229);; Cellular Component: integrin complex (GO:0008305);;	K06584|2.8e-226|crg:105348912|K06584 integrin alpha 8 | (RefSeq) integrin alpha-8	integrin alpha-4 [Crassostrea gigas]
Cg03126	10.663	2.47949	1.51843	0.000726542	up	Molecular Function: ion channel activity (GO:0005216);; Cellular Component: integral component of membrane (GO:0016021);;	K04977|5.2e-210|crg:105330656|K04977 transient receptor potential cation channel subfamily M member 2 [EC:3.6.1.13] | (RefSeq) transient receptor potential cation channel subfamily M member 2-like	transient receptor potential cation channel subfamily M member-like 2 [Crassostrea gigas]
Cg26805	3.7273	0.831831	1.53961	0.000655605	up	--	--	uncharacterized protein LOC105345671 isoform X2 [Crassostrea gigas]
Cg27972	1.4893	0.611083	1.07535	0.00181254	up	Biological Process: RNA methylation (GO:0001510);; Molecular Function: molecular_function (GO:0003674);; Molecular Function: RNA binding (GO:0003723);; Molecular Function: catalytic activity (GO:0003824);; Biological Process: nucleobase-containing compound metabolic process (GO:0006139);; Biological Process: RNA processing (GO:0006396);; Biological Process: tRNA metabolic process (GO:0006399);; B…	--	THUMP domain-containing protein 2 [Crassostrea gigas]
Cg04436	8.2217	3.55675	1.04399	0.00127439	up	Cellular Component: integral component of membrane (GO:0016021);;	--	uncharacterized protein LOC105341631 isoform X4 [Crassostrea gigas]
Crassostrea_gigas_newGene_7912	0.0126493	3.25152	-2.43296	5.73408e-07	down	Molecular Function: zinc ion binding (GO:0008270);;	K11997|1.3e-231|crg:105326056|K11997 tripartite motif-containing protein 2/3 | (RefSeq) tripartite motif-containing protein 55	tripartite motif-containing protein 3-like [Crassostrea gigas]
Cg14245	13.4574	39.9999	-1.2636	0.00240249	down	Molecular Function: secondary active sulfate transmembrane transporter activity (GO:0008271);; Cellular Component: integral component of membrane (GO:0016021);;	K14453|5.0e-130|obi:106873475|K14453 solute carrier family 26, other | (RefSeq) sulfate transporter-like	solute carrier family 26 member 6 isoform X1 [Crassostrea gigas]
Crassostrea_gigas_newGene_3552	13.7453	1.45034	2.38784	1.55216e-08	up	Molecular Function: zinc ion binding (GO:0008270);;	K11997|4.9e-220|crg:105323897|K11997 tripartite motif-containing protein 2/3 | (RefSeq) uncharacterized protein LOC105323897	uncharacterized protein LOC105341279 isoform X1 [Crassostrea gigas]
Crassostrea_gigas_newGene_7849	1.53648	7.12343	-2.14893	5.61602e-26	down	Molecular Function: zinc ion binding (GO:0008270);;	--	uncharacterized protein LOC117693126 [Crassostrea gigas]
Cg12707	24.2048	50.5481	-1.07548	1.51047e-26	down	--	--	uncharacterized protein LOC105331687 [Crassostrea gigas]
Cg15447	0.116472	0.793312	-1.4972	0.00326467	down	Molecular Function: monooxygenase activity (GO:0004497);; Molecular Function: iron ion binding (GO:0005506);; Cellular Component: integral component of membrane (GO:0016021);; Molecular Function: oxidoreductase activity, acting on paired donors, with incorporation or reduction of molecular oxygen (GO:0016705);; Molecular Function: heme binding (GO:0020037);;	K17854|2.8e-251|crg:105332463|K17854 cytochrome P450 family 2 subfamily K | (RefSeq) cytochrome P450 2F2	LOW QUALITY PROTEIN: cytochrome P450 2B19 [Crassostrea gigas]
Crassostrea_gigas_newGene_16154	0.0113493	1.15668	-2.11572	1.82028e-05	down	--	--	uncharacterized protein LOC117686363 [Crassostrea gigas]
Cg15729	4.0522	14.805	-1.446	0.000647659	down	--	K23284|6.6e-99|crg:105343639|K23284 C1q-related factor | (RefSeq) complement C1q tumor necrosis factor-related protein 2	complement C1q tumor necrosis factor-related protein 7 [Crassostrea gigas]
Cg06401	1.07074	6.59937	-1.9658	2.48337e-06	down	Biological Process: lipid transport (GO:0006869);; Biological Process: aging (GO:0007568);; Molecular Function: lipid binding (GO:0008289);;	K03098|1.8e-105|crg:105331368|K03098 apolipoprotein D and lipocalin family protein | (RefSeq) apolipoprotein D	apolipoprotein D [Crassostrea gigas]
Cg22089	1.36966	3.59725	-1.36353	4.92428e-14	down	Cellular Component: integral component of membrane (GO:0016021);; Molecular Function: hydrolase activity (GO:0016787);;	K04977|0.0e+00|myi:110454821|K04977 transient receptor potential cation channel subfamily M member 2 [EC:3.6.1.13] | (RefSeq) transient receptor potential cation channel subfamily M member 7-like isoform X1	transient receptor potential cation channel subfamily M member-like 2 [Crassostrea gigas]
Cg00366	8.59379	0.412477	2.24694	4.35596e-06	up	Cellular Component: ubiquitin ligase complex (GO:0000151);; Molecular Function: molecular_function (GO:0003674);; Molecular Function: catalytic activity (GO:0003824);; Molecular Function: ubiquitin-protein transferase activity (GO:0004842);; Molecular Function: binding (GO:0005488);; Molecular Function: protein binding (GO:0005515);; Cellular Component: cellular_component (GO:0005575);; Cellular …	K06776|4.7e-83|crg:105346217|K06776 receptor-type tyrosine-protein phosphatase kappa [EC:3.1.3.48] | (RefSeq) receptor-type tyrosine-protein phosphatase epsilon	multiple epidermal growth factor-like domains protein 10 isoform X4 [Crassostrea gigas]
Crassostrea_gigas_newGene_14944	2.05572	5.08509	-1.2036	0.00224792	down	Molecular Function: ion channel activity (GO:0005216);; Cellular Component: integral component of membrane (GO:0016021);;	K04977|3.4e-75|crg:105330656|K04977 transient receptor potential cation channel subfamily M member 2 [EC:3.6.1.13] | (RefSeq) transient receptor potential cation channel subfamily M member 2-like	transient receptor potential cation channel subfamily M member 2-like [Crassostrea gigas]
Crassostrea_gigas_newGene_5151	6.44241	0.294755	3.73799	1.03943e-39	up	Molecular Function: protein tyrosine phosphatase activity (GO:0004725);;	K06776|2.0e-56|crg:105345976|K06776 receptor-type tyrosine-protein phosphatase kappa [EC:3.1.3.48] | (RefSeq) receptor-type tyrosine-protein phosphatase F-like	uncharacterized protein LOC117688693 isoform X1 [Crassostrea gigas]
Cg14048	3.01495	9.64347	-1.51768	6.91635e-07	down	Molecular Function: catalytic activity (GO:0003824);;	K23617|8.1e-45|obi:106871436|K23617 medium-chain acyl-CoA ligase, mitochondrial [EC:6.2.1.2] | (RefSeq) acyl-CoA synthetase family member 2, mitochondrial-like	medium-chain acyl-CoA ligase ACSF2, mitochondrial [Crassostrea gigas]
Cg13417	9.44193	4.00015	1.14368	2.60171e-07	up	Biological Process: multicellular organism development (GO:0007275);; Cellular Component: integral component of membrane (GO:0016021);; Molecular Function: Wnt-activated receptor activity (GO:0042813);;	K02432|4.1e-165|crg:105324307|K02432 frizzled 1/7 | (RefSeq) frizzled-7-A	frizzled-7-A [Crassostrea gigas]
Cg28363	1.47102	0.322695	1.73406	8.29901e-06	up	--	K23284|6.1e-14|myi:110453860|K23284 C1q-related factor | (RefSeq) complement C1q-like protein 2	uncharacterized protein LOC105327878 isoform X1 [Crassostrea gigas]
Cg20202	49.9152	102.922	-1.01899	1.89645e-06	down	Molecular Function: inorganic phosphate transmembrane transporter activity (GO:0005315);; Biological Process: phosphate ion transport (GO:0006817);; Cellular Component: integral component of membrane (GO:0016021);;	K14640|1.1e-304|crg:105318769|K14640 solute carrier family 20 (sodium-dependent phosphate transporter) | (RefSeq) sodium-dependent phosphate transporter 1 isoform X1	sodium-dependent phosphate transporter 1 isoform X2 [Crassostrea gigas]
Cg16096	0.935132	0.325214	1.36476	9.45552e-07	up	Molecular Function: oxidoreductase activity (GO:0016491);; Molecular Function: phosphopantetheine binding (GO:0031177);;	K12743|3.8e-58|fcd:110861984|K12743 N-(5-amino-5-carboxypentanoyl)-L-cysteinyl-D-valine synthase [EC:6.3.2.26] | (RefSeq) N-(5-amino-5-carboxypentanoyl)-L-cysteinyl-D- valine synthase-like	linear gramicidin synthase subunit D-like [Crassostrea gigas]
Cg09239	6.63812	2.74828	1.22897	1.00129e-33	up	Biological Process: interstrand cross-link repair (GO:0036297);; Cellular Component: Fanconi anaemia nuclear complex (GO:0043240);;	K10894|0.0e+00|crg:105347836|K10894 fanconi anemia group G protein | (RefSeq) uncharacterized protein LOC105347836 isoform X2	uncharacterized protein LOC105347836 isoform X1 [Crassostrea gigas]
Crassostrea_gigas_newGene_1241	0.22894	17.9619	-2.446	4.67576e-07	down	--	--	uncharacterized protein LOC105321412 isoform X3 [Crassostrea gigas]
Crassostrea_gigas_newGene_2290	0.646744	2.64656	-1.47075	0.00109609	down	--	--	uncharacterized protein LOC117692358 [Crassostrea gigas]
Cg20121	2.43612	0.984918	1.05663	0.00659577	up	Cellular Component: integral component of membrane (GO:0016021);;	K02881|6.8e-59|phu:Phum_PHUM087140|K02881 large subunit ribosomal protein L18 | (RefSeq) hypothetical protein	proton channel OtopLc isoform X1 [Crassostrea gigas]
Cg25147	2.44277	6.43273	-1.1795	0.00221607	down	--	K19867|6.2e-11|crg:105320251|K19867 LIM domain-binding protein 3 | (RefSeq) PDZ and LIM domain protein 7	uncharacterized protein LOC105334969 isoform X1 [Crassostrea gigas]
Crassostrea_gigas_newGene_13103	3.32624	0.184535	1.40947	0.00487022	up	Molecular Function: metal ion binding (GO:0046872);;	--	--
Cg24184	2.35254	13.1653	-1.9543	1.25957e-06	down	--	K10104|1.4e-127|crg:105322529|K10104 ficolin | (RefSeq) microfibril-associated glycoprotein 4	uncharacterized protein LOC111132602 [Crassostrea virginica]
Cg15960	2.982	1.31907	1.11551	2.28408e-13	up	Cellular Component: integral component of membrane (GO:0016021);; Molecular Function: RNA transmembrane transporter activity (GO:0051033);;	K20526|1.1e-10|egz:104124580|K20526 transgelin | (RefSeq) TAGLN; transgelin	SID1 transmembrane family member 1-like [Crassostrea gigas]
Cg23623	2.0933	0.00585462	5.57501	5.77296e-51	up	Molecular Function: molecular_function (GO:0003674);; Molecular Function: transporter activity (GO:0005215);; Molecular Function: organic acid transmembrane transporter activity (GO:0005342);; Cellular Component: cellular_component (GO:0005575);; Cellular Component: cell (GO:0005623);; Cellular Component: plasma membrane (GO:0005886);; Cellular Component: integral component of plasma membrane (GO…	K08181|2.3e-259|crg:105344145|K08181 MFS transporter, MCT family, solute carrier family 16 (monocarboxylic acid transporters), member 4 | (RefSeq) monocarboxylate transporter 5	monocarboxylate transporter 5 [Crassostrea gigas]
Cg18436	0.416963	1.4192	-1.53761	5.02411e-06	down	Molecular Function: catalytic activity (GO:0003824);;	K15789|3.3e-173|crg:105331396|K15789 threonine 3-dehydrogenase [EC:1.1.1.103] | (RefSeq) LOW QUALITY PROTEIN: L-threonine 3-dehydrogenase, mitochondrial-like	uncharacterized protein LOC105319123 isoform X1 [Crassostrea gigas]
Cg08751	1.28264	2.67221	-1.03618	2.30111e-07	down	Molecular Function: ATP binding (GO:0005524);; Cellular Component: integral component of membrane (GO:0016021);; Molecular Function: ATPase activity (GO:0016887);;	K21396|3.2e-286|crg:105335473|K21396 ATP-binding cassette, subfamily G (WHITE), eye pigment precursor transporter | (RefSeq) protein white	protein white [Crassostrea gigas]
Cg11343	0.18603	1.06978	-1.64458	0.000488843	down	Molecular Function: nuclease activity (GO:0004518);;	K15029|5.0e-47|pdam:113670687|K15029 translation initiation factor 3 subunit L | (RefSeq) protein asteroid homolog 1-like	protein asteroid homolog 1-like [Crassostrea gigas]
Cg04258	0.645472	1.79894	-1.30048	2.58961e-05	down	Molecular Function: cytokine activity (GO:0005125);; Cellular Component: extracellular region (GO:0005576);;	--	uncharacterized protein LOC105335987 [Crassostrea gigas]
Cg07367	0.321062	6.10027	-3.74335	2.01858e-38	down	Cellular Component: integral component of membrane (GO:0016021);;	--	SAFB-like transcription modulator [Crassostrea gigas]
Crassostrea_gigas_newGene_6136	4.60736	0.320739	1.98587	6.04166e-05	up	Molecular Function: zinc ion binding (GO:0008270);;	K19930|9.1e-23|lhu:105679516|K19930 SRC kinase signaling inhibitor 1 | (RefSeq) LOW QUALITY PROTEIN: uncharacterized protein LOC105679516	uncharacterized protein LOC117687417 [Crassostrea gigas]
Crassostrea_gigas_newGene_9905	8.10579	2.73688	1.54056	0.000105714	up	--	--	uncharacterized protein LOC105323876 isoform X1 [Crassostrea gigas]
Cg07552	1.16419	0.168285	2.06584	7.89751e-07	up	--	K08057|6.7e-51|crg:105322293|K08057 calreticulin | (RefSeq) calreticulin	uncharacterized protein LOC105341023 [Crassostrea gigas]
Crassostrea_gigas_newGene_11568	0.962778	5.66983	-1.77021	0.000104952	down	Molecular Function: molecular_function (GO:0003674);; Molecular Function: binding (GO:0005488);; Cellular Component: cellular_component (GO:0005575);; Molecular Function: chitin binding (GO:0008061);; Molecular Function: drug binding (GO:0008144);; Cellular Component: membrane (GO:0016020);; Molecular Function: carbohydrate derivative binding (GO:0097367);;	K10104|2.4e-51|lak:106157226|K10104 ficolin | (RefSeq) techylectin-5B-like	microfibril-associated glycoprotein 4-like [Crassostrea gigas]
Cg21944	4.21552	1.88161	1.03332	0.000344029	up	Cellular Component: Golgi membrane (GO:0000139);; Biological Process: regulation of cell growth (GO:0001558);; Molecular Function: molecular_function (GO:0003674);; Cellular Component: cellular_component (GO:0005575);; Cellular Component: intracellular (GO:0005622);; Cellular Component: cell (GO:0005623);; Cellular Component: cytoplasm (GO:0005737);; Cellular Component: Golgi apparatus (GO:000579…	K22455|7.5e-12|myd:102768673|K22455 estrogen receptor-binding fragment-associated gene 9 protein | (RefSeq) EBAG9; estrogen receptor binding site associated, antigen, 9	receptor-binding cancer antigen expressed on SiSo cells isoform X1 [Crassostrea gigas]
Cg14026	0.161385	6.84812	-1.49669	0.00297229	down	Cellular Component: integral component of membrane (GO:0016021);;	--	uncharacterized protein LOC105319534 [Crassostrea gigas]
Cg16194	0.177291	0.630802	-1.41746	0.000819539	down	Molecular Function: calcium channel activity (GO:0005262);; Cellular Component: integral component of membrane (GO:0016021);;	K04966|4.0e-279|pcan:112559947|K04966 transient receptor potential cation channel subfamily C member 3 | (RefSeq) LOW QUALITY PROTEIN: short transient receptor potential channel 3-like	short transient receptor potential channel 3 [Crassostrea gigas]
Cg03242	1.72926	6.13807	-1.39578	0.00143741	down	--	--	uncharacterized protein LOC105320878 [Crassostrea gigas]
Crassostrea_gigas_newGene_11809	1.51366	4.53381	-1.20078	0.00562235	down	Molecular Function: G-protein coupled peptide receptor activity (GO:0008528);; Cellular Component: integral component of membrane (GO:0016021);;	K05053|1.5e-224|crg:109619604|K05053 neuromedin U receptor 2 | (RefSeq) sex peptide receptor-like	sex peptide receptor [Crassostrea gigas]
Cg04768	1.26946	4.48612	-1.73644	3.75879e-15	down	--	K16726|2.6e-06|crg:105330604|K16726 ankyrin repeat domain-containing protein 17 | (RefSeq) uncharacterized protein LOC105330604	uncharacterized protein LOC105329942 isoform X1 [Crassostrea gigas]
Crassostrea_gigas_newGene_11168	5.6925	0.881687	2.29883	3.88881e-13	up	Molecular Function: zinc ion binding (GO:0008270);;	K11997|1.2e-113|crg:105326056|K11997 tripartite motif-containing protein 2/3 | (RefSeq) tripartite motif-containing protein 55	uncharacterized protein LOC105320626 [Crassostrea gigas]
Cg04769	3.45736	15.4298	-2.00804	1.28738e-15	down	--	K16726|2.5e-06|crg:105330604|K16726 ankyrin repeat domain-containing protein 17 | (RefSeq) uncharacterized protein LOC105330604	uncharacterized protein LOC105327802 isoform X1 [Crassostrea gigas]
Cg26567	0.916352	2.71782	-1.16682	0.00881541	down	--	--	prostate-associated microseminoprotein-like [Crassostrea gigas]
Cg16053	1.39193	0.524937	1.12009	0.00597464	up	--	K23222|2.1e-36|nve:116603331|K23222 nuclease HARBI1 [EC:3.1.-.-] | (RefSeq) putative nuclease HARBI1 isoform X1	protein ALP1-like [Crassostrea gigas]
Cg04014	1.13791	0.099783	2.46573	5.19269e-09	up	Cellular Component: ESCRT I complex (GO:0000813);; Molecular Function: hydrolase activity, hydrolyzing O-glycosyl compounds (GO:0004553);; Biological Process: carbohydrate metabolic process (GO:0005975);;	K13050|3.5e-35|pcan:112554562|K13050 proprotein convertase subtilisin/kexin type 9 [EC:3.4.21.-] | (RefSeq) uncharacterized protein LOC112554562	endo-1,4-beta-xylanase 2-like isoform X1 [Crassostrea gigas]
Crassostrea_gigas_newGene_8029	6.02324	15.8957	-1.2561	0.00277238	down	Molecular Function: calcium ion binding (GO:0005509);; Molecular Function: calcium-dependent phospholipid binding (GO:0005544);; Biological Process: negative regulation of coagulation (GO:0050819);;	K17095|1.1e-70|crg:105335793|K17095 annexin A7/11 | (RefSeq) annexin A7	annexin A7 [Crassostrea gigas]
Cg00802	0.0556458	0.506104	-1.5274	0.00291845	down	Molecular Function: hydrolase activity, hydrolyzing O-glycosyl compounds (GO:0004553);; Molecular Function: beta-N-acetylhexosaminidase activity (GO:0004563);; Biological Process: carbohydrate metabolic process (GO:0005975);; Molecular Function: polysaccharide binding (GO:0030247);;	K12373|0.0e+00|crg:105336206|K12373 hexosaminidase [EC:3.2.1.52] | (RefSeq) uncharacterized protein LOC105336206	uncharacterized protein LOC105336206 isoform X1 [Crassostrea gigas]
Cg10736	2.03943	4.80906	-1.16679	1.1437e-05	down	Molecular Function: protein kinase activity (GO:0004672);; Molecular Function: ATP binding (GO:0005524);;	K05410|9.6e-147|crg:105347598|K05410 TANK-binding kinase 1 [EC:2.7.11.10] | (RefSeq) inhibitor of nuclear factor kappa-B kinase subunit epsilon isoform X1	inhibitor of nuclear factor kappa-B kinase subunit epsilon isoform X2 [Crassostrea gigas]
Cg06291	104.994	23.1008	1.89546	1.14544e-09	up	Molecular Function: carbohydrate binding (GO:0030246);;	K19511|2.3e-11|spu:589591|K19511 peroxidase [EC:1.11.1.7] | (RefSeq) LOW QUALITY PROTEIN: peroxidasin homolog	L-rhamnose-binding lectin CSL3 isoform X2 [Crassostrea gigas]
Cg24668	0.0959613	0.417372	-1.68226	1.42204e-05	down	Molecular Function: transmembrane signaling receptor activity (GO:0004888);; Molecular Function: extracellular ligand-gated ion channel activity (GO:0005230);; Cellular Component: integral component of membrane (GO:0016021);;	K04808|9.0e-86|crg:109620758|K04808 nicotinic acetylcholine receptor alpha-6 | (RefSeq) neuronal acetylcholine receptor subunit alpha-6-like	neuronal acetylcholine receptor subunit alpha-6-like [Crassostrea gigas]
Crassostrea_gigas_newGene_14879	7.22077	0.503884	2.66524	4.34338e-09	up	Molecular Function: calcium ion binding (GO:0005509);;	K23284|4.2e-06|crg:105320703|K23284 C1q-related factor | (RefSeq) complement C1q-like protein 3	cerebellin-3-like isoform X1 [Crassostrea gigas]
Cg11977	5.28513	1.2898	1.61699	3.19036e-05	up	Molecular Function: secondary active sulfate transmembrane transporter activity (GO:0008271);; Cellular Component: integral component of membrane (GO:0016021);;	K14703|0.0e+00|crg:105337646|K14703 solute carrier family 26, member 5 | (RefSeq) prestin	prestin [Crassostrea gigas]
Cg29602	1.89934	0.0527525	2.08574	2.32143e-05	up	Cellular Component: integral component of membrane (GO:0016021);;	K21396|4.8e-23|adf:107351108|K21396 ATP-binding cassette, subfamily G (WHITE), eye pigment precursor transporter | (RefSeq) protein white-like	ABC transporter G family member 22 [Crassostrea gigas]
Cg26989	1.12727	5.90659	-2.19524	2.18629e-17	down	--	--	uncharacterized protein LOC105325914 isoform X6 [Crassostrea gigas]
Cg16350	7.54509	3.5472	1.01829	1.06685e-08	up	Molecular Function: transmembrane signaling receptor activity (GO:0004888);; Molecular Function: extracellular ligand-gated ion channel activity (GO:0005230);; Cellular Component: integral component of membrane (GO:0016021);;	K05312|2.4e-59|crg:105333547|K05312 nicotinic acetylcholine receptor, invertebrate | (RefSeq) acetylcholine receptor subunit alpha-like	acetylcholine receptor subunit beta-type unc-29-like [Crassostrea gigas]
Cg15325	618.259	210.922	1.45836	4.9965e-13	up	Cellular Component: collagen trimer (GO:0005581);;	--	collagen alpha-1(I) chain [Crassostrea gigas]
Cg09485	0.920278	6.17495	-2.03024	1.77945e-06	down	Molecular Function: methionine-tRNA ligase activity (GO:0004825);; Molecular Function: ATP binding (GO:0005524);; Biological Process: methionyl-tRNA aminoacylation (GO:0006431);;	K23284|1.2e-63|crg:105320703|K23284 C1q-related factor | (RefSeq) complement C1q-like protein 3	uncharacterized protein LOC117691221 [Crassostrea gigas]
Cg03573	16.183	1.69345	2.9192	1.69408e-28	up	--	--	uncharacterized protein LOC105346863 [Crassostrea gigas]
Cg03813	3.23258	0.234175	2.68171	1.25907e-10	up	--	K06760|8.6e-13|crg:105326176|K06760 contactin 2 | (RefSeq) uncharacterized protein LOC105326176	uncharacterized protein LOC105319773 isoform X1 [Crassostrea gigas]
Cg27610	1.88432	4.01216	-1.06971	4.19716e-09	down	Molecular Function: potassium channel activity (GO:0005267);; Cellular Component: integral component of membrane (GO:0016021);;	K04912|2.3e-145|crg:105330268|K04912 potassium channel subfamily K member 1 | (RefSeq) potassium channel subfamily K member 1 isoform X1	potassium channel subfamily K member 1 isoform X2 [Crassostrea gigas]
Cg10101	0.0227135	1.40239	-3.63137	9.18355e-18	down	--	K10104|5.2e-57|crg:105328745|K10104 ficolin | (RefSeq) ficolin-2	fibroleukin [Crassostrea gigas]
Cg25675	0.941355	0.246937	1.28978	0.00689506	up	Molecular Function: zinc ion binding (GO:0008270);;	K12035|7.8e-203|crg:105342970|K12035 tripartite motif-containing protein 71 [EC:2.3.2.27] | (RefSeq) uncharacterized protein LOC105342970 isoform X1	E3 ubiquitin-protein ligase TRIM71-like [Crassostrea gigas]
Crassostrea_gigas_newGene_7240	1.88674	5.60332	-1.35832	0.000111155	down	Molecular Function: zinc ion binding (GO:0008270);; Cellular Component: integral component of membrane (GO:0016021);;	K11997|5.1e-134|crg:105332634|K11997 tripartite motif-containing protein 2/3 | (RefSeq) E3 ubiquitin-protein ligase TRIM71	uncharacterized protein LOC105327377 isoform X1 [Crassostrea gigas]
Cg28558	1.91834	6.06405	-1.41724	9.40883e-05	down	Cellular Component: integral component of membrane (GO:0016021);; Molecular Function: transmembrane transporter activity (GO:0022857);;	K08202|1.6e-303|crg:105340354|K08202 MFS transporter, OCT family, solute carrier family 22 (organic cation transporter), member 4/5 | (RefSeq) organic cation transporter protein isoform X1	organic cation transporter protein-like [Crassostrea gigas]
Cg28381	1.2673	2.61241	-1.0476	4.00994e-12	down	Molecular Function: transmembrane signaling receptor activity (GO:0004888);; Molecular Function: extracellular ligand-gated ion channel activity (GO:0005230);; Cellular Component: integral component of membrane (GO:0016021);;	K04812|4.6e-104|myi:110457762|K04812 nicotinic acetylcholine receptor beta-1 | (RefSeq) acetylcholine receptor subunit beta-like	acetylcholine receptor subunit beta [Crassostrea gigas]
Cg11864	0	5.07069	-3.82304	1.81266e-17	down	--	--	uncharacterized protein LOC105340440 [Crassostrea gigas]
Cg09274	1.25046	2.61118	-1.03768	3.77565e-08	down	Molecular Function: oxidoreductase activity, acting on CH-OH group of donors (GO:0016614);; Molecular Function: flavin adenine dinucleotide binding (GO:0050660);;	K00108|2.1e-112|obo:105280505|K00108 choline dehydrogenase [EC:1.1.99.1] | (RefSeq) glucose dehydrogenase [FAD, quinone]	glucose dehydrogenase [FAD, quinone]-like [Crassostrea gigas]
Cg05230	17.7431	5.93695	1.27936	0.000793941	up	--	K01183|4.0e-37|lak:106175122|K01183 chitinase [EC:3.2.1.14] | (RefSeq) probable endochitinase	uncharacterized protein LOC109618985 isoform X1 [Crassostrea gigas]
Crassostrea_gigas_newGene_9425	34.5536	72.9007	-1.0101	0.000798988	down	Molecular Function: motor activity (GO:0003774);; Molecular Function: actin binding (GO:0003779);; Molecular Function: chitin synthase activity (GO:0004100);; Molecular Function: ATP binding (GO:0005524);; Cellular Component: integral component of membrane (GO:0016021);; Cellular Component: myosin complex (GO:0016459);;	K00698|0.0e+00|crg:105317562|K00698 chitin synthase [EC:2.4.1.16] | (RefSeq) uncharacterized protein LOC105317562 isoform X1	uncharacterized protein LOC105317562 isoform X3 [Crassostrea gigas]
Cg19929	5.22698	1.38884	1.65488	2.5936e-07	up	Molecular Function: ATP binding (GO:0005524);; Cellular Component: integral component of membrane (GO:0016021);; Molecular Function: ATPase activity (GO:0016887);; Molecular Function: ATPase activity, coupled to transmembrane movement of substances (GO:0042626);;	K05681|0.0e+00|crg:105334117|K05681 ATP-binding cassette, subfamily G (WHITE), member 2 | (RefSeq) ATP-binding cassette sub-family G member 2 isoform X2	broad substrate specificity ATP-binding cassette transporter ABCG2 isoform X4 [Crassostrea gigas]
Crassostrea_gigas_newGene_12646	0.843656	0.0944238	1.75633	0.000389983	up	Cellular Component: small-subunit processome (GO:0032040);;	--	uncharacterized protein LOC105327491 [Crassostrea gigas]
Cg05526	6.23822	0.128122	2.50764	2.35077e-07	up	Molecular Function: RNA binding (GO:0003723);; Molecular Function: NAD+ ADP-ribosyltransferase activity (GO:0003950);;	K15261|1.0e-19|mcc:715591|K15261 poly [ADP-ribose] polymerase 10/14/15 [EC:2.4.2.30] | (RefSeq) PARP14; protein mono-ADP-ribosyltransferase PARP14	uncharacterized protein LOC109618487 [Crassostrea gigas]
Cg29114	2.01964	0.15546	2.51002	1.56051e-08	up	--	--	uncharacterized protein LOC105339048 isoform X3 [Crassostrea gigas]
Cg02563	8.80119	0	7.01255	1.31123e-73	up	Molecular Function: nucleotide binding (GO:0000166);; Biological Process: immune effector process (GO:0002252);; Biological Process: immune system process (GO:0002376);; Biological Process: regulation of immune system process (GO:0002682);; Molecular Function: molecular_function (GO:0003674);; Molecular Function: nucleic acid binding (GO:0003676);; Molecular Function: RNA binding (GO:0003723);; M…	K22544|3.6e-249|crg:105343592|K22544 deoxynucleoside triphosphate triphosphohydrolase SAMHD1 [EC:3.1.5.-] | (RefSeq) deoxynucleoside triphosphate triphosphohydrolase SAMHD1	deoxynucleoside triphosphate triphosphohydrolase SAMHD1 isoform X2 [Crassostrea gigas]
Cg25563	1.69616	0.6688	1.07847	0.00743991	up	Cellular Component: integral component of membrane (GO:0016021);; Molecular Function: semaphorin receptor activity (GO:0017154);;	K06820|4.2e-137|oaa:100078207|K06820 plexin A | (RefSeq) PLXNA2; plexin-A2 isoform X1	plexin-A2 [Crassostrea gigas]
Cg14505	0.243438	1.78036	-1.88333	4.9255e-05	down	Molecular Function: protein binding (GO:0005515);;	K10443|0.0e+00|crg:105330626|K10443 kelch-like protein 2/3 | (RefSeq) kelch-like protein 3	kelch-like protein 3 [Crassostrea gigas]
Cg17012	1.87847	0.803356	1.09504	8.72522e-05	up	Biological Process: protein polyubiquitination (GO:0000209);; Molecular Function: protease binding (GO:0002020);; Biological Process: positive regulation of antimicrobial peptide production (GO:0002225);; Biological Process: regulation of immune system process (GO:0002682);; Biological Process: positive regulation of immune system process (GO:0002684);; Biological Process: regulation of immune ef…	K16060|3.6e-08|mdl:103576215|K16060 baculoviral IAP repeat-containing protein 2/3 | (RefSeq) baculoviral IAP repeat-containing protein 7-B isoform X1	uncharacterized protein LOC117684293 isoform X3 [Crassostrea gigas]
Cg07129	8.61608	0.867433	2.98618	8.76102e-33	up	--	K00477|2.8e-115|lak:106177775|K00477 phytanoyl-CoA hydroxylase [EC:1.14.11.18] | (RefSeq) uncharacterized protein LOC106177775	uncharacterized protein LOC105320171 [Crassostrea gigas]
Crassostrea_gigas_newGene_8926	1.7796	0.620027	1.13379	0.0009266	up	Molecular Function: thiol-dependent ubiquitin-specific protease activity (GO:0004843);; Biological Process: monoubiquitinated histone H2A deubiquitination (GO:0035522);;	--	--
Cg10463	0.754876	3.04875	-1.35738	0.00514425	down	Molecular Function: metallopeptidase activity (GO:0008237);;	K21440|2.2e-38|crg:109621148|K21440 ankyrin repeat domain-containing protein 50 | (RefSeq) ankyrin repeat domain-containing protein 50-like	uncharacterized protein LOC109620440 isoform X1 [Crassostrea gigas]
Cg02847	1.95469	0.448574	1.80315	5.58939e-08	up	Molecular Function: protein tyrosine phosphatase activity (GO:0004725);; Cellular Component: integral component of membrane (GO:0016021);;	--	multiple epidermal growth factor-like domains protein 10 isoform X2 [Crassostrea gigas]
Cg08105	3.54203	0.623022	2.24431	3.11125e-16	up	Cellular Component: integral component of membrane (GO:0016021);; Molecular Function: transferase activity (GO:0016740);;	K00665|2.2e-97|clec:106667275|K00665 fatty acid synthase, animal type [EC:2.3.1.85] | (RefSeq) fatty acid synthase-like	uncharacterized protein LOC117680414 [Crassostrea gigas]
Cg21139	6.89966	71.4123	-2.09447	9.11594e-06	down	Cellular Component: integral component of membrane (GO:0016021);; Biological Process: transmembrane transport (GO:0055085);;	K14353|8.0e-87|crg:105337680|K14353 solute carrier organic anion transporter family, member 3A | (RefSeq) solute carrier organic anion transporter family member 5A1-like	solute carrier organic anion transporter family member 5A1-like [Crassostrea gigas]
Cg26789	0.155352	1.45939	-1.80489	0.000245791	down	Molecular Function: oxidoreductase activity (GO:0016491);;	K00306|1.0e-76|sko:100373335|K00306 sarcosine oxidase / L-pipecolate oxidase [EC:1.5.3.1 1.5.3.7] | (RefSeq) uncharacterized LOC100373335	N-methyl-L-tryptophan oxidase [Crassostrea gigas]
Crassostrea_gigas_newGene_14399	6.83465	1.23265	2.21874	1.89885e-15	up	Molecular Function: protein binding (GO:0005515);; Molecular Function: methyltransferase activity (GO:0008168);; Biological Process: methylation (GO:0032259);;	K08852|1.3e-09|aplc:110986593|K08852 serine/threonine-protein kinase/endoribonuclease IRE1 [EC:2.7.11.1 3.1.26.-] | (RefSeq) uncharacterized protein LOC110986593 isoform X1	N-lysine methyltransferase KMT5A-like [Crassostrea gigas]
Cg15083	9.96122	4.00683	1.07202	0.00541459	up	--	--	uncharacterized protein LOC105330666 isoform X1 [Crassostrea gigas]
Crassostrea_gigas_newGene_10683	6.04737	2.8461	1.0004	1.29928e-06	up	Cellular Component: cellular_component (GO:0005575);; Cellular Component: intracellular (GO:0005622);; Cellular Component: cell (GO:0005623);; Cellular Component: cytoplasm (GO:0005737);; Cellular Component: mitochondrion (GO:0005739);; Cellular Component: mitochondrial envelope (GO:0005740);; Cellular Component: mitochondrial intermembrane space (GO:0005758);; Biological Process: biological_proc…	--	Cx9C motif-containing protein 4 [Mizuhopecten yessoensis]
Cg20311	1.87006	5.0365	-1.29974	1.44301e-05	down	Molecular Function: glutathione transferase activity (GO:0004364);; Cellular Component: cytoplasm (GO:0005737);;	K00799|5.1e-137|crg:105318598|K00799 glutathione S-transferase [EC:2.5.1.18] | (RefSeq) glutathione S-transferase omega-1-like	glutathione S-transferase omega-1-like isoform X1 [Crassostrea gigas]
Cg25610	3.05535	6.89459	-1.06906	0.000537951	down	Molecular Function: DNA binding (GO:0003677);; Molecular Function: transposase activity (GO:0004803);; Biological Process: transposition, DNA-mediated (GO:0006313);;	K23209|1.0e-52|pcan:112573126|K23209 DNA transposase THAP9 [EC:2.7.7.-] | (RefSeq) uncharacterized protein LOC112573126	uncharacterized protein LOC117686787 [Crassostrea gigas]
Cg07393	1.5142	3.89498	-1.27278	4.35503e-06	down	Biological Process: activation of innate immune response (GO:0002218);; Biological Process: signal transduction (GO:0007165);; Biological Process: positive regulation of type I interferon production (GO:0032481);;	K12654|7.4e-51|myi:110441212|K12654 transmembrane protein 173 | (RefSeq) uncharacterized protein LOC110441212	uncharacterized protein LOC105329774 [Crassostrea gigas]
Cg30681	0.447204	4.53096	-2.28642	2.61869e-07	down	--	--	uncharacterized protein LOC109617529 [Crassostrea gigas]
Cg21195	6.46754	1.99738	1.31427	0.0013755	up	--	--	uncharacterized protein LOC105338932 [Crassostrea gigas]
Cg11462	1.8327	7.37742	-1.49392	0.000681282	down	Cellular Component: integral component of membrane (GO:0016021);;	--	uncharacterized protein LOC117682688 [Crassostrea gigas]
Crassostrea_gigas_newGene_12196	8.05177	17.8477	-1.14152	5.36406e-12	down	Molecular Function: NAD+ binding (GO:0070403);;	K11412|1.1e-257|crg:105326889|K11412 NAD+-dependent protein deacetylase sirtuin 2 [EC:2.3.1.286] | (RefSeq) NAD-dependent protein deacetylase sirtuin-2	NAD-dependent protein deacetylase sirtuin-2 [Crassostrea gigas]
Cg29260	3.95221	0.959139	1.6438	1.93505e-05	up	Cellular Component: integral component of membrane (GO:0016021);;	--	transmembrane protein 106B isoform X1 [Crassostrea gigas]
Crassostrea_gigas_newGene_13739	0.751839	2.40242	-1.46172	1.80902e-05	down	Molecular Function: nucleic acid binding (GO:0003676);; Biological Process: DNA integration (GO:0015074);;	K13356|4.0e-81|nvi:100117878|K13356 alcohol-forming fatty acyl-CoA reductase [EC:1.2.1.84] | (RefSeq) putative fatty acyl-CoA reductase CG5065 isoform X1	uncharacterized protein LOC117686492 [Crassostrea gigas]
Cg01386	0.262462	1.16754	-1.86471	3.88476e-09	down	Molecular Function: metalloendopeptidase activity (GO:0004222);; Molecular Function: zinc ion binding (GO:0008270);; Cellular Component: membrane (GO:0016020);;	K23441|4.2e-113|crg:105343507|K23441 hepatocyte growth factor-like protein | (RefSeq) plasminogen	uncharacterized protein LOC105334358 [Crassostrea gigas]
Cg11838	3.14171	0.130395	2.41378	6.19586e-07	up	--	K22754|4.4e-12|spis:111338202|K22754 E3 ubiquitin-protein ligase RNF213 [EC:2.3.2.27] | (RefSeq) E3 ubiquitin-protein ligase RNF213-like	uncharacterized protein LOC117682964 isoform X1 [Crassostrea gigas]
Cg09085	1.12009	2.33138	-1.02773	2.70491e-06	down	Biological Process: protein polyubiquitination (GO:0000209);; Molecular Function: protease binding (GO:0002020);; Biological Process: positive regulation of antimicrobial peptide production (GO:0002225);; Biological Process: regulation of immune system process (GO:0002682);; Biological Process: positive regulation of immune system process (GO:0002684);; Biological Process: regulation of immune ef…	K16060|7.7e-155|crg:105328063|K16060 baculoviral IAP repeat-containing protein 2/3 | (RefSeq) baculoviral IAP repeat-containing protein 7-A	baculoviral IAP repeat-containing protein 7-B [Crassostrea gigas]
Crassostrea_gigas_newGene_6774	1.74917	4.8666	-1.30401	9.53026e-05	down	--	K20098|0.0e+00|crg:105346383|K20098 DNA excision repair protein ERCC-6-like 2 [EC:3.6.4.-] | (RefSeq) DNA excision repair protein ERCC-6-like 2	DNA excision repair protein ERCC-6-like 2 isoform X1 [Crassostrea gigas]
Cg05667	1.38128	3.55356	-1.28747	2.35429e-07	down	Cellular Component: integral component of membrane (GO:0016021);;	K15015|6.3e-46|api:100161526|K15015 solute carrier family 32 (vesicular inhibitory amino acid transporter) | (RefSeq) vesicular inhibitory amino acid transporter	vesicular inhibitory amino acid transporter-like [Crassostrea virginica]
Cg01826	0.529215	0.00167888	4.11192	2.69261e-20	up	--	--	unnamed protein product [Mytilus coruscus]
Crassostrea_gigas_newGene_410	0.876781	3.64239	-1.78631	4.54471e-08	down	Molecular Function: scavenger receptor activity (GO:0005044);; Cellular Component: integral component of membrane (GO:0016021);;	--	multiple epidermal growth factor-like domains protein 10 [Crassostrea gigas]
Crassostrea_gigas_newGene_15222	22.3454	3.97553	2.37055	4.60305e-18	up	--	K12035|2.8e-85|crg:105344902|K12035 tripartite motif-containing protein 71 [EC:2.3.2.27] | (RefSeq) uncharacterized protein LOC105344902	uncharacterized protein LOC109620627 isoform X1 [Crassostrea gigas]
Cg17953	4.75554	1.61805	1.25753	0.00122233	up	Molecular Function: RNA binding (GO:0003723);;	K11089|7.8e-100|nle:100597203|K11089 60 kDa SS-A/Ro ribonucleoprotein | (RefSeq) RO60; 60 kDa SS-A/Ro ribonucleoprotein isoform X1	60 kDa SS-A/Ro ribonucleoprotein-like [Crassostrea gigas]
Crassostrea_gigas_newGene_10965	1.13791	0.169622	2.14733	1.2332e-08	up	--	K11997|1.8e-104|crg:105326056|K11997 tripartite motif-containing protein 2/3 | (RefSeq) tripartite motif-containing protein 55	uncharacterized protein LOC105348282 [Crassostrea gigas]
Cg16055	3.86956	0	6.39156	4.47911e-60	up	Molecular Function: zinc ion binding (GO:0008270);;	K19410|9.8e-15|dpa:109543998|K19410 inner nuclear membrane protein Man1 | (RefSeq) uncharacterized protein LOC109543998 isoform X1	uncharacterized protein LOC105329751 isoform X1 [Crassostrea gigas]
Crassostrea_gigas_newGene_6181	3.09699	0.0260073	2.39608	7.53721e-07	up	Molecular Function: zinc ion binding (GO:0008270);;	K12021|1.9e-08|crg:105344696|K12021 tripartite motif-containing protein 45 | (RefSeq) tripartite motif-containing protein 45-like	tripartite motif-containing protein 45-like [Crassostrea gigas]
Cg05178	4.50689	1.65026	1.35574	1.73747e-11	up	Molecular Function: mannosyl-oligosaccharide glucosidase activity (GO:0004573);; Biological Process: oligosaccharide metabolic process (GO:0009311);;	K01228|4.9e-07|mde:101894492|K01228 mannosyl-oligosaccharide glucosidase [EC:3.2.1.106] | (RefSeq) mannosyl-oligosaccharide glucosidase	uncharacterized protein YMR196W isoform X1 [Crassostrea gigas]
Cg04591	2.67045	8.38232	-1.20864	0.00838347	down	Molecular Function: peptidyl-prolyl cis-trans isomerase activity (GO:0003755);;	K17767|1.1e-187|crg:105333257|K17767 AH receptor-interacting protein | (RefSeq) AH receptor-interacting protein	AH receptor-interacting protein isoform X2 [Crassostrea gigas]
Cg29186	1.07483	3.56691	-1.49845	8.7685e-06	down	Cellular Component: integral component of membrane (GO:0016021);; Molecular Function: metal ion binding (GO:0046872);;	--	uncharacterized protein LOC105343384 isoform X1 [Crassostrea gigas]
Cg09150	0.856787	0.0195191	1.98408	5.39911e-05	up	Molecular Function: protein binding (GO:0005515);; Molecular Function: GTP binding (GO:0005525);;	K12800|2.4e-29|mze:106675363|K12800 NACHT, LRR and PYD domains-containing protein 3 | (RefSeq) NACHT, LRR and PYD domains-containing protein 12	uncharacterized protein LOC105339033 [Crassostrea gigas]
Cg15616	4.91233	1.98478	1.1303	0.000618163	up	Molecular Function: transmembrane signaling receptor activity (GO:0004888);; Molecular Function: extracellular ligand-gated ion channel activity (GO:0005230);; Cellular Component: integral component of membrane (GO:0016021);;	K05312|4.9e-68|myi:110455090|K05312 nicotinic acetylcholine receptor, invertebrate | (RefSeq) acetylcholine receptor subunit alpha-like 2	neuronal acetylcholine receptor subunit alpha-3 [Crassostrea gigas]
Crassostrea_gigas_newGene_6670	3.71769	12.5442	-1.6724	7.50186e-14	down	Biological Process: cilium assembly (GO:0060271);; Biological Process: establishment of epithelial cell polarity (GO:0090162);; Cellular Component: ciliary transition fiber (GO:0097539);;	K16471|1.1e-107|crg:105343799|K16471 Fas-binding factor 1 | (RefSeq) fas-binding factor 1 homolog isoform X2	LOW QUALITY PROTEIN: fas-binding factor 1 homolog [Crassostrea gigas]
Crassostrea_gigas_newGene_7002	0.606575	1.85407	-1.37597	0.000144407	down	Cellular Component: integral component of membrane (GO:0016021);;	K12026|2.5e-240|crg:105334788|K12026 tripartite motif-containing protein 56 [EC:2.3.2.27] | (RefSeq) probable E3 ubiquitin-protein ligase MID2	E3 ubiquitin-protein ligase TRIM56-like [Crassostrea gigas]
Cg07893	0.309592	1.09998	-1.58571	1.45718e-06	down	--	--	uncharacterized protein LOC105333776 [Crassostrea gigas]
Cg07800	0.003266	0.346502	-3.21376	2.05028e-12	down	Molecular Function: nucleic acid binding (GO:0003676);; Molecular Function: aspartic-type endopeptidase activity (GO:0004190);; Biological Process: DNA integration (GO:0015074);;	K06065|6.1e-175|xma:102225078|K06065 nuclear receptor co-repressor 2 | (RefSeq) uncharacterized protein LOC102225078	uncharacterized protein LOC105343682 [Crassostrea gigas]
Cg10929	0.342706	2.22487	-1.3885	0.00722619	down	Molecular Function: zinc ion binding (GO:0008270);; Biological Process: methionine biosynthetic process (GO:0009086);; Biological Process: methylation (GO:0032259);; Molecular Function: betaine-homocysteine S-methyltransferase activity (GO:0047150);;	K00544|1.4e-140|crg:105339575|K00544 betaine-homocysteine S-methyltransferase [EC:2.1.1.5] | (RefSeq) betaine--homocysteine S-methyltransferase 1	S-methylmethionine--homocysteine S-methyltransferase BHMT2 [Crassostrea gigas]
Cg02852	0.731923	8.81905	-1.79188	0.000347299	down	Molecular Function: scavenger receptor activity (GO:0005044);; Cellular Component: integral component of membrane (GO:0016021);;	--	multiple epidermal growth factor-like domains protein 10 [Crassostrea gigas]
Cg19613	2.39724	1.02361	1.02345	0.00318612	up	Molecular Function: GTPase activity (GO:0003924);; Molecular Function: GTP binding (GO:0005525);; Biological Process: signal transduction (GO:0007165);; Cellular Component: membrane (GO:0016020);;	K07836|5.1e-123|crg:105325587|K07836 Ras-related protein Rap-1B | (RefSeq) ras-related protein Rap-1b	ras-related protein Rap-1b [Crassostrea gigas]
Crassostrea_gigas_newGene_3051	3.0091	9.01028	-1.49175	3.77836e-09	down	Molecular Function: zinc ion binding (GO:0008270);; Cellular Component: WASH complex (GO:0071203);;	K12035|2.6e-134|crg:105325102|K12035 tripartite motif-containing protein 71 [EC:2.3.2.27] | (RefSeq) uncharacterized protein LOC105325102	uncharacterized protein LOC117682518 isoform X2 [Crassostrea gigas]
Crassostrea_gigas_newGene_15975	5.63652	0.0498045	4.34823	5.88319e-25	up	--	--	uncharacterized protein LOC117680777 [Crassostrea gigas]
Crassostrea_gigas_newGene_3855	4.8856	1.91142	1.30694	1.53203e-07	up	--	K11997|6.0e-169|crg:105323897|K11997 tripartite motif-containing protein 2/3 | (RefSeq) uncharacterized protein LOC105323897	uncharacterized protein LOC109617698 [Crassostrea gigas]
Crassostrea_gigas_newGene_13100	10.3806	0.366383	2.49356	2.41896e-07	up	Molecular Function: metal ion binding (GO:0046872);;	--	uncharacterized protein LOC105320504 [Crassostrea gigas]
Crassostrea_gigas_newGene_7082	0.680318	1.58093	-1.05504	0.00330549	down	--	--	uncharacterized protein LOC105337388 isoform X2 [Crassostrea gigas]
Cg10782	3.53357	1.22801	1.31728	2.80995e-05	up	Cellular Component: integral component of membrane (GO:0016021);;	--	transmembrane protein 187 [Crassostrea gigas]
Cg01667	3.04693	7.77385	-1.29247	1.00752e-08	down	Molecular Function: protein tyrosine phosphatase activity (GO:0004725);;	K13297|4.5e-212|crg:105334126|K13297 receptor-type tyrosine-protein phosphatase T [EC:3.1.3.48] | (RefSeq) receptor-type tyrosine-protein phosphatase epsilon-like	receptor-type tyrosine-protein phosphatase epsilon-like [Crassostrea gigas]
Cg22537	2.75599	1.05294	1.27726	3.72518e-09	up	Cellular Component: mitochondrion (GO:0005739);; Biological Process: mitochondrial respiratory chain complex II assembly (GO:0034553);;	--	succinate dehydrogenase assembly factor 3, mitochondrial [Crassostrea gigas]
Cg06368	0.603249	1.40528	-1.0935	0.000549425	down	Cellular Component: integral component of membrane (GO:0016021);; Molecular Function: transmembrane transporter activity (GO:0022857);;	K13868|2.2e-269|crg:105322846|K13868 solute carrier family 7 (L-type amino acid transporter), member 9/15 | (RefSeq) b(0,+)-type amino acid transporter 1	b(0,+)-type amino acid transporter 1 [Crassostrea gigas]
Cg19453	64.5947	16.6284	1.64914	1.92871e-06	up	Molecular Function: glutathione peroxidase activity (GO:0004602);; Biological Process: response to oxidative stress (GO:0006979);;	K00432|4.3e-131|crg:105329785|K00432 glutathione peroxidase [EC:1.11.1.9] | (RefSeq) epididymal secretory glutathione peroxidase-like	selenium-dependent glutathione peroxidase, partial [Crassostrea gigas]
Crassostrea_gigas_newGene_9659	0.805633	1.73789	-1.09717	1.44077e-05	down	Cellular Component: integral component of membrane (GO:0016021);; Molecular Function: transferase activity, transferring acyl groups (GO:0016746);;	K17305|2.8e-30|crg:105347033|K17305 beta-2-glycoprotein 1 | (RefSeq) sushi, von Willebrand factor type A, EGF and pentraxin domain-containing protein 1	uncharacterized protein LOC105333579 isoform X1 [Crassostrea gigas]
Cg29221	7.98972	3.19415	1.21583	7.6109e-08	up	--	--	uncharacterized protein LOC105320291 isoform X1 [Crassostrea gigas]
Cg01787	3.81478	0.753811	1.96623	6.2253e-09	up	Molecular Function: scavenger receptor activity (GO:0005044);;	K06776|7.5e-49|crg:105346217|K06776 receptor-type tyrosine-protein phosphatase kappa [EC:3.1.3.48] | (RefSeq) receptor-type tyrosine-protein phosphatase epsilon	multiple epidermal growth factor-like domains protein 10 isoform X1 [Crassostrea gigas]
Crassostrea_gigas_newGene_10729	4.08371	1.45718	1.22007	0.0010391	up	Biological Process: reproduction (GO:0000003);; Biological Process: MAPK cascade (GO:0000165);; Biological Process: syncytium formation by plasma membrane fusion (GO:0000768);; Biological Process: cell morphogenesis (GO:0000902);; Biological Process: cell morphogenesis involved in differentiation (GO:0000904);; Biological Process: eye development (GO:0001654);; Biological Process: urogenital syst…	K00699|2.0e-23|prap:110999367|K00699 glucuronosyltransferase [EC:2.4.1.17] | (RefSeq) UDP-glucuronosyltransferase 1-9-like	uncharacterized protein LOC110043872 [Orbicella faveolata]
Cg06578	5.62016	2.20882	1.10459	0.00323924	up	Molecular Function: protein binding (GO:0005515);;	--	serine protease inhibitor dipetalogastin [Crassostrea gigas]
Cg03207	0.479327	6.32564	-1.72955	0.000621112	down	--	K05693|1.8e-39|crg:105331003|K05693 receptor-type tyrosine-protein phosphatase mu [EC:3.1.3.48] | (RefSeq) receptor-type tyrosine-protein phosphatase epsilon	multiple epidermal growth factor-like domains protein 10 [Crassostrea gigas]
Cg30686	24.9301	9.00325	1.31077	5.50904e-06	up	Biological Process: signal transduction (GO:0007165);; Molecular Function: kinase activity (GO:0016301);; Molecular Function: binding, bridging (GO:0060090);;	K16551|1.8e-88|myi:110452281|K16551 A-kinase anchor protein 9 | (RefSeq) A-kinase anchor protein 9-like isoform X1	A-kinase anchor protein 9 isoform X10 [Crassostrea gigas]
Cg14504	0.275647	0.678338	-1.07126	0.00702382	down	Molecular Function: voltage-gated potassium channel activity (GO:0005249);; Cellular Component: voltage-gated potassium channel complex (GO:0008076);;	K04887|3.7e-230|crg:105320925|K04887 potassium voltage-gated channel Shaw-related subfamily C member 1 | (RefSeq) potassium voltage-gated channel protein Shab	potassium voltage-gated channel protein egl-36 [Crassostrea gigas]
Cg02171	0.0305412	1.07915	-2.07718	2.6717e-05	down	--	K06776|8.9e-54|crg:105328169|K06776 receptor-type tyrosine-protein phosphatase kappa [EC:3.1.3.48] | (RefSeq) receptor-type tyrosine-protein phosphatase epsilon	neurogenic locus protein delta [Crassostrea gigas]
Cg03040	0	30.1187	-9.12084	4.38738e-167	down	Molecular Function: ion channel activity (GO:0005216);; Cellular Component: integral component of membrane (GO:0016021);;	K04977|2.0e-201|crg:105330656|K04977 transient receptor potential cation channel subfamily M member 2 [EC:3.6.1.13] | (RefSeq) transient receptor potential cation channel subfamily M member 2-like	transient receptor potential cation channel subfamily M member-like 2 isoform X2 [Crassostrea gigas]
Cg06089	2.40164	6.82569	-1.3026	0.000305387	down	--	--	uncharacterized protein MAL13P1.336-like [Crassostrea gigas]
Cg28412	387.924	165.463	1.18397	4.0186e-33	up	Molecular Function: calcium ion binding (GO:0005509);; Biological Process: calcium-mediated signaling (GO:0019722);;	K02183|2.3e-80|aplc:110979490|K02183 calmodulin | (RefSeq) calmodulin-like protein 12	calmodulin-like protein 1 [Asterias rubens]
Cg23637	1.46732	3.57323	-1.23426	6.61122e-08	down	Molecular Function: DNA binding (GO:0003677);; Molecular Function: DNA-directed DNA polymerase activity (GO:0003887);; Cellular Component: nucleus (GO:0005634);; Molecular Function: metal ion binding (GO:0046872);;	K03513|4.8e-302|crg:105326976|K03513 DNA polymerase mu [EC:2.7.7.7] | (RefSeq) DNA-directed DNA/RNA polymerase mu	DNA-directed DNA/RNA polymerase mu [Crassostrea gigas]
Cg04295	217.322	58.5616	1.60555	3.17102e-06	up	Cellular Component: collagen trimer (GO:0005581);;	K06238|2.6e-72|myi:110451446|K06238 collagen type VI alpha | (RefSeq) collagen alpha-4(VI) chain-like	collagen alpha-1(XII) chain [Crassostrea gigas]
Cg15959	1.15077	0.237906	2.00936	7.58965e-14	up	Molecular Function: zinc ion binding (GO:0008270);;	K12026|0.0e+00|crg:105336110|K12026 tripartite motif-containing protein 56 [EC:2.3.2.27] | (RefSeq) tripartite motif-containing protein 45	tripartite motif-containing protein 45 [Crassostrea gigas]
Cg07499	14.656	5.85972	1.13834	0.000477017	up	--	--	uncharacterized protein LOC105318473 [Crassostrea gigas]
Cg05099	3.09538	0.0121385	3.14631	3.51371e-11	up	--	--	uncharacterized protein LOC117688010 [Crassostrea gigas]
Cg04959	10.9509	3.03695	1.66247	6.85541e-10	up	Molecular Function: S-adenosylmethionine-dependent methyltransferase activity (GO:0008757);; Biological Process: methylation (GO:0032259);;	K00569|5.3e-124|crg:105343239|K00569 thiopurine S-methyltransferase [EC:2.1.1.67] | (RefSeq) probable thiopurine S-methyltransferase isoform X1	thiopurine S-methyltransferase [Crassostrea gigas]
Cg10147	8.72328	0.687961	3.35506	1.69945e-44	up	Molecular Function: catalytic activity (GO:0003824);;	K23617|1.9e-45|adf:107338061|K23617 medium-chain acyl-CoA ligase, mitochondrial [EC:6.2.1.2] | (RefSeq) acyl-CoA synthetase family member 2, mitochondrial-like	medium-chain acyl-CoA ligase ACSF2, mitochondrial [Crassostrea gigas]
Cg09686	4.05619	12.6981	-1.43119	2.42595e-05	down	--	K10059|6.8e-125|crg:105318716|K10059 C-type lectin domain family 4 member E | (RefSeq) C-type lectin mannose-binding isoform	C-type lectin mannose-binding isoform [Crassostrea gigas]
Cg20352	4.77897	1.7921	1.31995	1.43156e-10	up	Cellular Component: cellular_component (GO:0005575);; Cellular Component: cell (GO:0005623);; Biological Process: multicellular organism development (GO:0007275);; Biological Process: nervous system development (GO:0007399);; Biological Process: biological_process (GO:0008150);; Molecular Function: zinc ion binding (GO:0008270);; Biological Process: regulation of synaptic growth at neuromuscular …	K06780|4.9e-36|crg:105330908|K06780 cell adhesion molecule 3 | (RefSeq) uncharacterized protein LOC105330908	nectin-4-like isoform X1 [Crassostrea gigas]
Cg02302	1.24984	6.95558	-2.21238	4.06315e-14	down	Molecular Function: dopamine beta-monooxygenase activity (GO:0004500);; Molecular Function: copper ion binding (GO:0005507);;	K00503|0.0e+00|crg:105342404|K00503 dopamine beta-monooxygenase [EC:1.14.17.1] | (RefSeq) tyramine beta-hydroxylase	tyramine beta-hydroxylase [Crassostrea gigas]
Cg18145	6.02442	2.38704	1.21359	1.05999e-06	up	Biological Process: DNA repair (GO:0006281);; Cellular Component: host cell nucleus (GO:0042025);;	K06662|2.5e-250|crg:105320658|K06662 cell cycle checkpoint protein | (RefSeq) cell cycle checkpoint protein RAD17-like	cell cycle checkpoint protein RAD17-like isoform X3 [Crassostrea gigas]
Cg22501	0.0566507	3.50963	-4.704	6.19088e-44	down	Molecular Function: calcium ion binding (GO:0005509);;	K17341|3.1e-43|myi:110449963|K17341 hemicentin | (RefSeq) hemicentin-1-like	hemicentin-1 isoform X1 [Crassostrea gigas]
Cg07570	231.163	0.0497901	1.88158	8.20261e-05	up	--	--	putative uncharacterized protein DDB_G0286901 [Crassostrea gigas]
Crassostrea_gigas_newGene_14101	2.35758	10.4463	-1.83332	9.84154e-06	down	Cellular Component: integral component of membrane (GO:0016021);;	--	protein draper-like isoform X1 [Crassostrea gigas]
Cg08317	1.1766	4.878	-1.47347	0.00134683	down	Cellular Component: integral component of membrane (GO:0016021);;	--	uncharacterized protein LOC117692058 isoform X1 [Crassostrea gigas]
Cg11849	0.836872	0	5.26881	1.11946e-38	up	--	K12655|1.5e-07|dqu:106747799|K12655 OTU domain-containing protein 5 [EC:3.4.19.12] | (RefSeq) OTU domain-containing protein 5-B isoform X1	uncharacterized protein LOC109618217 isoform X1 [Crassostrea gigas]
Crassostrea_gigas_newGene_5431	0.0274693	0.444511	-1.85723	0.000205085	down	--	K12646|2.3e-14|sko:102805200|K12646 ATP-dependent RNA helicase DDX58 [EC:3.6.4.13] | (RefSeq) probable ATP-dependent RNA helicase DDX58-like	uncharacterized protein LOC117322521 isoform X1 [Pecten maximus]
Cg02885	0.444939	1.80817	-1.32637	0.00612909	down	--	--	uncharacterized protein LOC105319042 [Crassostrea gigas]
Cg04420	3.64881	7.53364	-1.0129	6.03175e-06	down	Cellular Component: cellular_component (GO:0005575);; Cellular Component: cell (GO:0005623);; Cellular Component: cilium (GO:0005929);; Cellular Component: cell projection (GO:0042995);; Cellular Component: organelle (GO:0043226);; Cellular Component: organelle part (GO:0044422);; Cellular Component: ciliary part (GO:0044441);; Cellular Component: cell projection part (GO:0044463);; Cellular Comp…	--	coiled-coil domain-containing protein 149-B isoform X3 [Crassostrea gigas]
Crassostrea_gigas_newGene_14123	0.340062	3.48961	-2.05412	1.26911e-05	down	Molecular Function: zinc ion binding (GO:0008270);;	K11997|1.3e-30|crg:105324145|K11997 tripartite motif-containing protein 2/3 | (RefSeq) uncharacterized protein LOC105324145	uncharacterized protein LOC117683562 [Crassostrea gigas]
Crassostrea_gigas_newGene_14313	0.167222	2.53248	-2.91554	5.42908e-14	down	Molecular Function: nucleic acid binding (GO:0003676);;	K02357|2.3e-10|myi:110442892|K02357 elongation factor Ts | (RefSeq) uncharacterized protein LOC110442892 isoform X1	DNA polymerase III PolC-type-like [Crassostrea gigas]
Cg05049	4.07718	17.6343	-1.81088	1.83783e-07	down	--	--	uncharacterized protein LOC105343152 isoform X1 [Crassostrea gigas]
Crassostrea_gigas_newGene_1736	0.493693	2.91456	-1.69978	9.09377e-05	down	--	--	multiple epidermal growth factor-like domains protein 10 isoform X1 [Crassostrea gigas]
Cg09139	2.17716	0.424148	1.42634	0.00431824	up	Cellular Component: integral component of membrane (GO:0016021);;	--	multiple epidermal growth factor-like domains protein 10 [Crassostrea gigas]
Cg05524	2.92729	6.93617	-1.23298	1.12892e-15	down	Molecular Function: RNA binding (GO:0003723);; Molecular Function: NAD+ ADP-ribosyltransferase activity (GO:0003950);;	K15260|4.8e-18|ccar:109062491|K15260 poly [ADP-ribose] polymerase 9 [EC:2.4.2.30] | (RefSeq) poly [ADP-ribose] polymerase 9-like	uncharacterized protein LOC109618487 [Crassostrea gigas]
Crassostrea_gigas_newGene_6364	2.2956	6.20093	-1.21626	0.00256203	down	--	K23284|1.1e-58|crg:105336626|K23284 C1q-related factor | (RefSeq) complement C1q-like protein 4 isoform X1	complement C1q-like protein 4 [Crassostrea gigas]
Crassostrea_gigas_newGene_510	46.4734	95.6006	-1.34589	0.00179113	down	--	K23440|4.6e-25|pdam:113668108|K23440 serine protease 56 [EC:3.4.21.-] | (RefSeq) phenoloxidase-activating factor 1-like	pancreatic secretory granule membrane major glycoprotein GP2-like [Crassostrea virginica]
Cg08330	0.144907	13.7417	-4.52663	5.3393e-30	down	Cellular Component: integral component of membrane (GO:0016021);;	--	uncharacterized protein LOC105329733 isoform X3 [Crassostrea gigas]
Cg03016	2.07701	6.03766	-1.27607	0.000999507	down	--	--	uncharacterized protein LOC105340645 isoform X1 [Crassostrea gigas]
Cg22719	4.23632	1.73831	1.2153	4.38179e-14	up	Molecular Function: phosphotransferase activity, alcohol group as acceptor (GO:0016773);; Molecular Function: hydrolase activity, acting on glycosyl bonds (GO:0016798);;	K16330|0.0e+00|crg:105318930|K16330 pseudouridylate synthase / pseudouridine kinase [EC:4.2.1.70 2.7.1.83] | (RefSeq) pseudouridine-metabolizing bifunctional protein C1861.05	pseudouridine-metabolizing bifunctional protein C1861.05 [Crassostrea gigas]
Cg03188	1.71383	0.463269	1.66162	1.41882e-08	up	Molecular Function: calcium ion binding (GO:0005509);; Biological Process: cell-matrix adhesion (GO:0007160);; Cellular Component: integral component of membrane (GO:0016021);;	K17307|6.1e-155|crg:105347696|K17307 fibulin 1/2 | (RefSeq) mucin-like protein	mucin-like protein isoform X1 [Crassostrea gigas]
Cg16241	3.70086	0.771517	2.04875	4.97102e-17	up	Molecular Function: secondary active sulfate transmembrane transporter activity (GO:0008271);; Biological Process: sulfate transport (GO:0008272);; Molecular Function: sulfate transmembrane transporter activity (GO:0015116);; Cellular Component: integral component of membrane (GO:0016021);;	K14453|7.1e-102|obi:106873475|K14453 solute carrier family 26, other | (RefSeq) sulfate transporter-like	sulfate transporter [Crassostrea gigas]
Cg24403	4.46801	1.98255	1.02551	0.00094268	up	Molecular Function: molecular_function (GO:0003674);; Molecular Function: catalytic activity (GO:0003824);; Biological Process: biological_process (GO:0008150);; Biological Process: metabolic process (GO:0008152);; Molecular Function: oxidoreductase activity (GO:0016491);; Biological Process: oxidation-reduction process (GO:0055114);;	K11153|3.1e-48|lgi:LOTGIDRAFT_189035|K11153 retinol dehydrogenase 12 [EC:1.1.1.300] | (RefSeq) hypothetical protein	retinol dehydrogenase 11 [Crassostrea gigas]
Cg21174	0.541987	1.39219	-1.28716	9.24411e-08	down	Molecular Function: G-protein coupled receptor activity (GO:0004930);; Cellular Component: integral component of membrane (GO:0016021);;	K04134|2.2e-71|crg:105342885|K04134 muscarinic acetylcholine receptor | (RefSeq) melanocortin receptor 4	melanocortin receptor 3 [Crassostrea gigas]
Cg18322	0.248851	5.13786	-1.55479	0.00226203	down	Cellular Component: collagen trimer (GO:0005581);;	--	short-chain collagen C4 [Crassostrea gigas]
Cg26493	2.37019	5.98902	-1.22594	2.05655e-05	down	Molecular Function: CoA-transferase activity (GO:0008410);;	K01796|8.3e-219|crg:105335665|K01796 alpha-methylacyl-CoA racemase [EC:5.1.99.4] | (RefSeq) alpha-methylacyl-CoA racemase isoform X1	alpha-methylacyl-CoA racemase isoform X3 [Crassostrea gigas]
Cg18885	0.204219	1.318	-2.08682	1.26178e-07	down	Biological Process: carbohydrate transport (GO:0008643);; Molecular Function: symporter activity (GO:0015293);; Cellular Component: integral component of membrane (GO:0016021);;	--	transmembrane protein 180 [Crassostrea gigas]
Cg11617	0.178473	1.09239	-1.45019	0.00437036	down	Cellular Component: integral component of membrane (GO:0016021);;	--	protein shisa-5 [Crassostrea gigas]
Cg09072	20.6491	0.33847	4.97419	9.63223e-54	up	--	K23284|4.8e-188|crg:105341871|K23284 C1q-related factor | (RefSeq) uncharacterized protein LOC105341871	uncharacterized protein LOC105341871 [Crassostrea gigas]
Cg21763	15.4939	35.1279	-1.16705	1.338e-10	down	Cellular Component: integral component of membrane (GO:0016021);; Molecular Function: metal ion transmembrane transporter activity (GO:0046873);;	K14710|2.5e-76|sanh:107693302|K14710 solute carrier family 39 (zinc transporter), member 4 | (RefSeq) slc39a4; zinc transporter ZIP4	zinc transporter ZIP10 [Crassostrea gigas]
Cg13137	0.179869	0.63209	-1.32701	0.00284508	down	Cellular Component: extracellular region (GO:0005576);; Molecular Function: peptidase inhibitor activity (GO:0030414);;	--	uncharacterized protein LOC105332559 [Crassostrea gigas]
Cg09278	5.59307	2.30511	1.1858	1.19813e-08	up	Molecular Function: calcium ion binding (GO:0005509);; Cellular Component: integral component of membrane (GO:0016021);;	--	uncharacterized protein LOC109621096 [Crassostrea gigas]
Cg21019	1.39171	10.6426	-2.74367	7.40554e-34	down	Molecular Function: catalytic activity (GO:0003824);; Molecular Function: ATP transmembrane transporter activity (GO:0005347);; Molecular Function: calcium ion binding (GO:0005509);; Biological Process: biosynthetic process (GO:0009058);; Cellular Component: integral component of membrane (GO:0016021);; Molecular Function: pyridoxal phosphate binding (GO:0030170);;	K00812|1.7e-29|spis:111341214|K00812 aspartate aminotransferase [EC:2.6.1.1] | (RefSeq) bifunctional aspartate aminotransferase and glutamate/aspartate-prephenate aminotransferase-like	aspartate aminotransferase-like isoform X1 [Crassostrea gigas]
Cg18458	1.36969	4.92368	-1.33628	0.00397598	down	Biological Process: cell fate determination (GO:0001709);; Biological Process: regionalization (GO:0003002);; Molecular Function: molecular_function (GO:0003674);; Molecular Function: receptor binding (GO:0005102);; Molecular Function: Notch binding (GO:0005112);; Molecular Function: binding (GO:0005488);; Molecular Function: calcium ion binding (GO:0005509);; Molecular Function: protein binding …	K04011|1.5e-24|fpg:101918890|K04011 complement component (3b/4b) receptor 1 | (RefSeq) CR1; complement C3b/C4b receptor 1 (Knops blood group)	uncharacterized protein LOC105324805 [Crassostrea gigas]
Cg08897	0.521306	1.26203	-1.15636	0.000198842	down	--	K08654|0.0e+00|crg:105325677|K08654 proprotein convertase subtilisin/kexin type 5 [EC:3.4.21.-] | (RefSeq) proprotein convertase subtilisin/kexin type 5-like	proprotein convertase subtilisin/kexin type 5-like [Crassostrea gigas]
Cg04289	1.60682	44.4652	-4.5409	7.00916e-108	down	Molecular Function: phosphatase activity (GO:0016791);;	K01077|3.4e-303|crg:105318059|K01077 alkaline phosphatase [EC:3.1.3.1] | (RefSeq) alkaline phosphatase, tissue-nonspecific isozyme	alkaline phosphatase, tissue-nonspecific isozyme [Crassostrea gigas]
Cg25556	6.04933	116.5	-3.48217	1.14257e-22	down	--	--	short-chain collagen C4-like [Crassostrea gigas]
Cg27614	2.76465	6.21359	-1.00192	0.00750941	down	--	K10104|1.1e-154|crg:105338711|K10104 ficolin | (RefSeq) ficolin-2-like	ficolin-2-like isoform X2 [Crassostrea gigas]
Cg15085	9.04067	0.669007	3.53587	4.90034e-80	up	Cellular Component: integral component of membrane (GO:0016021);; Molecular Function: transmembrane transporter activity (GO:0022857);;	K14611|0.0e+00|crg:105317952|K14611 solute carrier family 23 (nucleobase transporter), member 1 | (RefSeq) solute carrier family 23 member 1	solute carrier family 23 member 1 [Crassostrea gigas]
Cg08003	8.176	2.31155	1.36532	0.0016439	up	Molecular Function: calcium ion binding (GO:0005509);; Biological Process: integrin-mediated signaling pathway (GO:0007229);;	K10405|1.3e-13|crg:105324632|K10405 kinesin family member C1 | (RefSeq) protein claret segregational-like	uncharacterized protein LOC109619378 [Crassostrea gigas]
Crassostrea_gigas_newGene_16323	1.01809	4.34072	-1.97347	7.78952e-19	down	Molecular Function: methyltransferase activity (GO:0008168);;	K14568|3.6e-124|crg:105322332|K14568 rRNA small subunit pseudouridine methyltransferase Nep1 [EC:2.1.1.260] | (RefSeq) ribosomal RNA small subunit methyltransferase NEP1	ribosomal RNA small subunit methyltransferase NEP1 [Crassostrea gigas]
Cg02840	0.443513	3.06754	-2.22107	6.53276e-09	down	Molecular Function: lysozyme activity (GO:0003796);; Biological Process: metabolic process (GO:0008152);;	--	LOW QUALITY PROTEIN: lysozyme [Crassostrea gigas]
Cg23609	91.5755	25.7542	1.67037	1.58849e-11	up	Molecular Function: carbohydrate binding (GO:0030246);;	K06721|1.9e-08|myi:110465240|K06721 C-type lectin domain family 10 member A | (RefSeq) perlucin-like	uncharacterized protein LOC105322501 isoform X2 [Crassostrea gigas]
Cg24395	0.0380605	1.97288	-2.05518	3.3486e-05	down	Molecular Function: metal ion binding (GO:0046872);;	K15255|7.9e-81|myi:110459287|K15255 ATP-dependent DNA helicase PIF1 [EC:3.6.4.12] | (RefSeq) uncharacterized protein LOC110459287	LOW QUALITY PROTEIN: uncharacterized protein LOC111132635 [Crassostrea virginica]
Crassostrea_gigas_newGene_15992	1.15113	5.00237	-1.87849	2.74546e-11	down	Molecular Function: zinc ion binding (GO:0008270);;	--	uncharacterized protein LOC117686117 [Crassostrea gigas]
Cg05505	2.15106	5.29055	-1.0807	0.00681559	down	--	--	uncharacterized protein LOC105336126 [Crassostrea gigas]
Cg20023	1.35725	3.61681	-1.27702	2.0182e-05	down	Molecular Function: phosphatidylinositol binding (GO:0035091);;	K17919|2.8e-06|isc:IscW_ISCW021259|K17919 sorting nexin-4 | (RefSeq) sorting nexin, putative	HCLS1-binding protein 3 [Crassostrea gigas]
Cg16752	2.47387	5.15124	-1.02246	1.41508e-05	down	Molecular Function: phospholipid transporter activity (GO:0005548);;	--	uncharacterized protein LOC105324676 isoform X1 [Crassostrea gigas]
Cg20096	5.77568	0.83757	1.5251	0.00281116	up	--	K08136|4.1e-67|myi:110463604|K08136 sparc/osteonectin, cwcv and kazal-like domains proteoglycan (testican) | (RefSeq) saxiphilin-like	nidogen-2 [Crassostrea gigas]
Crassostrea_gigas_newGene_6370	3.66033	22.1527	-1.88928	1.34745e-05	down	Biological Process: regulation of protein phosphorylation (GO:0001932);; Biological Process: negative regulation of protein phosphorylation (GO:0001933);; Molecular Function: molecular_function (GO:0003674);; Molecular Function: binding (GO:0005488);; Molecular Function: protein binding (GO:0005515);; Cellular Component: cellular_component (GO:0005575);; Cellular Component: extracellular region (…	K23284|3.7e-95|crg:105336630|K23284 C1q-related factor | (RefSeq) complement C1q-like protein 4	complement C1q-like protein 4 isoform X2 [Crassostrea gigas]
Crassostrea_gigas_newGene_1915	17.0179	0	6.13183	3.90918e-52	up	--	--	uncharacterized protein LOC109617426 isoform X1 [Crassostrea gigas]
Cg20624	0.695741	7.24865	-2.7783	3.22894e-15	down	--	--	uncharacterized protein LOC105322640 isoform X2 [Crassostrea gigas]
Crassostrea_gigas_newGene_2472	1.74108	0.636169	1.07845	0.0074142	up	--	--	uncharacterized protein LOC117685910 [Crassostrea gigas]
Cg28517	0.044195	1.71294	-1.66243	0.000976197	down	--	K05606|1.6e-30|crg:105324487|K05606 methylmalonyl-CoA/ethylmalonyl-CoA epimerase [EC:5.1.99.1] | (RefSeq) methylmalonyl-CoA epimerase, mitochondrial-like	methylmalonyl-CoA epimerase, mitochondrial [Crassostrea gigas]
Crassostrea_gigas_newGene_9753	29.4513	12.0005	1.1493	1.02669e-15	up	Molecular Function: nucleic acid binding (GO:0003676);; Molecular Function: helicase activity (GO:0004386);; Molecular Function: ATP binding (GO:0005524);;	K12646|9.3e-85|crg:105341798|K12646 ATP-dependent RNA helicase DDX58 [EC:3.6.4.13] | (RefSeq) probable ATP-dependent RNA helicase DDX58 isoform X1	antiviral innate immune response receptor RIG-I isoform X2 [Crassostrea gigas]
Cg14376	2.48629	5.20467	-1.03694	1.55125e-06	down	Cellular Component: integral component of membrane (GO:0016021);; Molecular Function: transmembrane transporter activity (GO:0022857);;	K14389|7.4e-290|crg:105324853|K14389 solute carrier family 5 (sodium/glucose cotransporter), member 9 | (RefSeq) sodium/glucose cotransporter 4 isoform X2	sodium/glucose cotransporter 4 [Crassostrea gigas]
Cg23700	24.9402	0	7.67117	6.91441e-103	up	Molecular Function: oxidoreductase activity (GO:0016491);;	K00019|3.9e-10|myi:110458387|K00019 3-hydroxybutyrate dehydrogenase [EC:1.1.1.30] | (RefSeq) uncharacterized protein LOC110458387	D-beta-hydroxybutyrate dehydrogenase [Crassostrea gigas]
Cg09046	1.2932	0.0113246	4.60476	5.20957e-31	up	Cellular Component: integral component of membrane (GO:0016021);; Molecular Function: transmembrane transporter activity (GO:0022857);;	K08190|4.4e-280|crg:105347670|K08190 MFS transporter, MCT family, solute carrier family 16 (monocarboxylic acid transporters), member 14 | (RefSeq) monocarboxylate transporter 9	monocarboxylate transporter 9 isoform X1 [Crassostrea gigas]
Cg05978	3.39189	0.760128	1.59877	0.000232246	up	--	--	ADP-ribosylarginine hydrolase Tri1 [Crassostrea gigas]
Cg05105	0.819152	2.00019	-1.08845	0.00370629	down	--	--	uncharacterized protein LOC105328369 isoform X2 [Crassostrea gigas]
Cg05192	8.45833	17.6259	-1.04598	9.8605e-09	down	Cellular Component: integral component of membrane (GO:0016021);;	K11323|1.5e-220|crg:105324815|K11323 histone arginine demethylase JMJD6 [EC:1.14.11.-] | (RefSeq) uncharacterized protein LOC105324815	uncharacterized protein LOC105324815 [Crassostrea gigas]
Cg10545	88.5356	0.322665	1.27617	0.0060269	up	Cellular Component: cytoplasm (GO:0005737);; Molecular Function: 2-alkenal reductase [NAD(P)] activity (GO:0032440);; Molecular Function: 15-oxoprostaglandin 13-oxidase activity (GO:0047522);;	K13948|1.3e-192|crg:105333322|K13948 prostaglandin reductase 1 [EC:1.3.1.74 1.3.1.48] | (RefSeq) prostaglandin reductase 1	prostaglandin reductase 1 [Crassostrea gigas]
Cg14869	8.1746	0.756463	2.99878	8.16035e-25	up	--	--	uncharacterized protein LOC105346991 isoform X1 [Crassostrea gigas]
Cg09170	1.50483	0.255097	1.53388	0.00208868	up	--	K23284|8.7e-191|crg:105343049|K23284 C1q-related factor | (RefSeq) paramyosin	paramyosin-like isoform X2 [Crassostrea gigas]
Cg27086	10.9489	0.552508	3.1815	6.82816e-15	up	Molecular Function: calcium ion binding (GO:0005509);; Molecular Function: calcium-dependent phospholipid binding (GO:0005544);;	--	uncharacterized protein LOC105324030 isoform X2 [Crassostrea gigas]
Crassostrea_gigas_newGene_10220	0.961876	12.2745	-1.92688	9.35632e-05	down	Cellular Component: collagen trimer (GO:0005581);;	K23284|1.1e-102|crg:105342905|K23284 C1q-related factor | (RefSeq) complement C1q-like protein 3	complement C1q-like protein 3 [Crassostrea gigas]
Cg03135	0.00072	9.29704	-7.62705	2.84024e-104	down	Molecular Function: ion channel activity (GO:0005216);; Cellular Component: integral component of membrane (GO:0016021);;	K04977|1.7e-229|crg:105330656|K04977 transient receptor potential cation channel subfamily M member 2 [EC:3.6.1.13] | (RefSeq) transient receptor potential cation channel subfamily M member 2-like	transient receptor potential cation channel subfamily M member-like 2 [Crassostrea gigas]
Crassostrea_gigas_newGene_5366	2.1663	5.67086	-1.22267	0.000416144	down	--	K12646|8.2e-26|sko:102805200|K12646 ATP-dependent RNA helicase DDX58 [EC:3.6.4.13] | (RefSeq) probable ATP-dependent RNA helicase DDX58-like	uncharacterized protein LOC117691134 isoform X1 [Crassostrea gigas]
Cg07799	4.02458	12.4972	-1.29387	0.00187944	down	Molecular Function: peroxidase activity (GO:0004601);; Biological Process: response to oxidative stress (GO:0006979);; Molecular Function: heme binding (GO:0020037);;	K12567|1.7e-32|myi:110458512|K12567 titin [EC:2.7.11.1] | (RefSeq) titin-like	myomesin-3-like [Crassostrea gigas]
Cg04466	14.6137	30.5943	-1.07863	1.14208e-20	down	Molecular Function: oxidoreductase activity (GO:0016491);;	K00079|1.3e-103|crg:105317039|K00079 carbonyl reductase 1 [EC:1.1.1.184 1.1.1.189 1.1.1.197] | (RefSeq) carbonyl reductase [NADPH] 1	carbonyl reductase [NADPH] 1-like isoform X1 [Crassostrea gigas]
Cg21977	0.27631	2.6469	-1.36337	0.00867777	down	--	--	putative uncharacterized protein DDB_G0286901 isoform X2 [Crassostrea gigas]
Cg29520	4.83172	0.0386826	4.37671	1.07741e-25	up	--	--	uncharacterized protein LOC111115261 [Crassostrea virginica]
Crassostrea_gigas_newGene_8040	0.0970207	2.0816	-3.09352	2.41823e-14	down	Molecular Function: phosphatidylinositol binding (GO:0035091);;	--	HCLS1-binding protein 3 [Crassostrea gigas]
Cg28004	11.8145	3.11829	1.81949	7.30315e-27	up	Cellular Component: cellular_component (GO:0005575);; Cellular Component: intracellular (GO:0005622);; Cellular Component: cell (GO:0005623);; Cellular Component: nucleus (GO:0005634);; Cellular Component: cytoplasm (GO:0005737);; Cellular Component: cytosol (GO:0005829);; Biological Process: biological_process (GO:0008150);; Biological Process: regulation of microtubule-based process (GO:0032886…	K06990|2.0e-172|crg:105336893|K06990 MEMO1 family protein | (RefSeq) protein MEMO1	protein MEMO1 [Crassostrea gigas]
Cg29617	1.29117	0.385356	1.50865	9.34614e-07	up	Molecular Function: iron ion binding (GO:0005506);; Cellular Component: integral component of membrane (GO:0016021);; Molecular Function: oxidoreductase activity, acting on paired donors, with incorporation or reduction of molecular oxygen (GO:0016705);; Molecular Function: L-ascorbic acid binding (GO:0031418);;	K00472|3.6e-105|pdam:113665427|K00472 prolyl 4-hydroxylase [EC:1.14.11.2] | (RefSeq) uncharacterized protein LOC113665427	prolyl 4-hydroxylase subunit alpha-1 [Crassostrea gigas]
Crassostrea_gigas_newGene_4072	2.14679	4.76141	-1.01081	0.00517119	down	Molecular Function: metal ion binding (GO:0046872);;	--	uncharacterized protein LOC117691969 [Crassostrea gigas]
Crassostrea_gigas_newGene_8625	0.354712	0.993504	-1.26416	0.000339958	down	Molecular Function: DNA binding (GO:0003677);; Cellular Component: nucleus (GO:0005634);;	--	uncharacterized protein LOC105344111 [Crassostrea gigas]
Cg09428	4.97938	1.80851	1.32304	2.53617e-07	up	Molecular Function: zinc ion binding (GO:0008270);; Biological Process: methionine biosynthetic process (GO:0009086);; Biological Process: methylation (GO:0032259);; Molecular Function: betaine-homocysteine S-methyltransferase activity (GO:0047150);;	K00544|2.7e-203|crg:105318319|K00544 betaine-homocysteine S-methyltransferase [EC:2.1.1.5] | (RefSeq) betaine--homocysteine S-methyltransferase 1 isoform X1	betaine--homocysteine S-methyltransferase 1 isoform X2 [Crassostrea gigas]
Cg04695	23.0923	7.83563	1.43445	2.10409e-10	up	Molecular Function: starch binding (GO:2001070);;	K22267|1.5e-14|myi:110463135|K22267 starch-binding domain-containing protein 1 | (RefSeq) uncharacterized protein LOC110463135	uncharacterized protein LOC105333128 isoform X1 [Crassostrea gigas]
Cg11560	1.84166	4.96487	-1.24016	0.000366387	down	--	--	uncharacterized protein LOC105348887 isoform X1 [Crassostrea gigas]
Crassostrea_gigas_newGene_16356	2.49279	5.47916	-1.13298	3.02523e-22	down	Biological Process: Notch signaling pathway (GO:0007219);; Biological Process: protein ubiquitination (GO:0016567);;	K06058|3.6e-35|crg:105346122|K06058 deltex [EC:2.3.2.27] | (RefSeq) uncharacterized protein LOC105346122	uncharacterized protein LOC105320519 [Crassostrea gigas]
Cg07017	16.0145	40.7013	-1.2446	1.56729e-05	down	Molecular Function: extracellular ligand-gated ion channel activity (GO:0005230);; Molecular Function: ATP binding (GO:0005524);; Cellular Component: integral component of membrane (GO:0016021);; Molecular Function: ligase activity (GO:0016874);; Molecular Function: metal ion binding (GO:0046872);;	K05186|1.9e-82|myi:110443131|K05186 gamma-aminobutyric acid receptor subunit gamma | (RefSeq) gamma-aminobutyric acid receptor subunit gamma-2-like isoform X1	uncharacterized protein LOC117692594 [Crassostrea gigas]
Crassostrea_gigas_newGene_2081	0.966489	3.69158	-1.47704	0.000512005	down	Molecular Function: oxidoreductase activity, acting on CH-OH group of donors (GO:0016614);; Molecular Function: flavin adenine dinucleotide binding (GO:0050660);;	K00115|6.9e-41|haw:110370921|K00115 glucose 1-dehydrogenase (FAD, quinone) [EC:1.1.5.9] | (RefSeq) glucose dehydrogenase [FAD, quinone]-like	alcohol dehydrogenase [acceptor]-like [Crassostrea gigas]
Crassostrea_gigas_newGene_11097	0.256142	1.43696	-1.41024	0.00545487	down	--	--	uncharacterized protein LOC117689140 [Crassostrea gigas]
Cg25585	0.101805	2.45615	-1.43293	0.00492402	down	--	--	uncharacterized protein LOC105322080 [Crassostrea gigas]
Cg04869	0.467432	1.45187	-1.21514	0.00696706	down	--	--	uncharacterized protein LOC117682706 [Crassostrea gigas]
Cg01213	0.314862	1.69457	-1.51825	0.00191696	down	Molecular Function: protein binding (GO:0005515);;	K10457|3.7e-294|crg:105323166|K10457 kelch-like protein 20 | (RefSeq) uncharacterized protein LOC105323166	kelch-like protein 26 [Crassostrea gigas]
Cg12021	1.02901	2.9482	-1.35644	2.3362e-05	down	Molecular Function: zinc ion binding (GO:0008270);;	K11997|2.3e-49|crg:105347509|K11997 tripartite motif-containing protein 2/3 | (RefSeq) tripartite motif-containing protein 45	uncharacterized protein LOC105321086 [Crassostrea gigas]
Cg08068	10.4614	0	6.54551	1.86749e-66	up	Molecular Function: transferase activity (GO:0016740);;	--	uncharacterized protein LOC117691492 isoform X1 [Crassostrea gigas]
Cg19722	0.022029	0.557	-1.94313	9.53757e-05	down	Molecular Function: DNA binding (GO:0003677);; Biological Process: DNA recombination (GO:0006310);; Biological Process: DNA integration (GO:0015074);;	--	uncharacterized protein LOC109617665 isoform X3 [Crassostrea gigas]
Cg27815	0.123441	0.460442	-1.64114	5.68596e-09	down	Molecular Function: NAD+ kinase activity (GO:0003951);;	K04715|3.4e-185|crg:105344779|K04715 ceramide kinase [EC:2.7.1.138] | (RefSeq) ceramide kinase	ceramide kinase-like [Crassostrea gigas]
Crassostrea_gigas_newGene_11819	0.681574	2.75576	-1.89369	9.07172e-09	down	Molecular Function: nucleic acid binding (GO:0003676);; Biological Process: DNA integration (GO:0015074);;	K10848|9.2e-77|pxy:105391721|K10848 DNA excision repair protein ERCC-4 [EC:3.1.-.-] | (RefSeq) uncharacterized LOC105391721	uncharacterized protein LOC117686492 [Crassostrea gigas]
Cg14341	3.3638	7.74366	-1.08739	0.000603848	down	--	K10609|4.8e-21|amex:111188264|K10609 cullin 4 | (RefSeq) LOW QUALITY PROTEIN: cullin-4A-like	heat shock 70 kDa protein 12A isoform X2 [Crassostrea gigas]
Cg03808	43.9622	11.4079	1.88734	3.6696e-55	up	Molecular Function: structural molecule activity (GO:0005198);; Biological Process: intracellular protein transport (GO:0006886);; Biological Process: vesicle-mediated transport (GO:0016192);; Cellular Component: membrane coat (GO:0030117);;	K01672|4.8e-172|crg:105347585|K01672 carbonic anhydrase [EC:4.2.1.1] | (RefSeq) carbonic anhydrase 1-like	carbonic anhydrase 1-like [Crassostrea gigas]
Cg10878	5.58054	0.133075	4.00544	3.66273e-27	up	Cellular Component: integral component of membrane (GO:0016021);;	K23284|2.6e-88|crg:105340576|K23284 C1q-related factor | (RefSeq) complement C1q tumor necrosis factor-related protein 4-like	complement C1q tumor necrosis factor-related protein 4-like [Crassostrea gigas]
Crassostrea_gigas_newGene_7419	0	4.24545	-1.40665	0.00450665	down	Molecular Function: scavenger receptor activity (GO:0005044);;	--	uncharacterized protein LOC109618518 isoform X2 [Crassostrea gigas]
Crassostrea_gigas_newGene_3553	0.0617645	1.7849	-1.68559	0.000832427	down	Molecular Function: zinc ion binding (GO:0008270);;	K11997|1.4e-230|crg:105323897|K11997 tripartite motif-containing protein 2/3 | (RefSeq) uncharacterized protein LOC105323897	uncharacterized protein LOC105328106 isoform X1 [Crassostrea gigas]
Cg10876	0	3.88663	-4.83298	7.6022e-33	down	Cellular Component: Set1C/COMPASS complex (GO:0048188);; Cellular Component: MLL1 complex (GO:0071339);;	K14966|3.3e-87|myi:110443354|K14966 host cell factor | (RefSeq) host cell factor 1-like isoform X1	host cell factor 1-like [Crassostrea gigas]
Cg29951	1.64264	5.78209	-1.63728	4.82613e-08	down	Molecular Function: hydrolase activity (GO:0016787);;	K01050|1.4e-190|crg:105343879|K01050 cholinesterase [EC:3.1.1.8] | (RefSeq) carboxylesterase 1C	carboxylesterase 1C-like [Crassostrea gigas]
Cg03869	1.21726	2.96203	-1.09641	0.00352429	down	Molecular Function: NAD+ ADP-ribosyltransferase activity (GO:0003950);; Molecular Function: ligase activity (GO:0016874);;	K10268|5.4e-46|spu:100891447|K10268 F-box and leucine-rich repeat protein 2/20 | (RefSeq) F-box protein SKP2A	uncharacterized protein LOC105332044 isoform X1 [Crassostrea gigas]
Cg10772	0.0183833	7.24029	-4.19529	1.87062e-22	down	--	K23284|2.5e-41|crg:105347609|K23284 C1q-related factor | (RefSeq) cerebellin-3	complement C1q tumor necrosis factor-related protein 3-like [Crassostrea gigas]
Cg17166	1.15465	2.96808	-1.28789	1.30468e-07	down	Molecular Function: voltage-gated potassium channel activity (GO:0005249);; Cellular Component: integral component of membrane (GO:0016021);;	--	unnamed protein product [Mytilus coruscus]
Cg16343	0.00934233	10.9176	-6.38296	1.33268e-70	down	Cellular Component: integral component of membrane (GO:0016021);;	K17353|3.7e-57|crg:105322031|K17353 tetraspanin-18 | (RefSeq) tetraspanin-1	uncharacterized protein LOC117681685 [Crassostrea gigas]
Cg30131	5.69955	2.37513	1.14025	1.57125e-05	up	Biological Process: signal transduction (GO:0007165);;	--	uncharacterized protein LOC105317104 isoform X2 [Crassostrea gigas]
Cg11459	0.504377	0.0470841	1.58168	0.00198901	up	--	K19410|1.0e-30|dpa:109543998|K19410 inner nuclear membrane protein Man1 | (RefSeq) uncharacterized protein LOC109543998 isoform X1	uncharacterized protein LOC117688269 [Crassostrea gigas]
Cg25334	0.340035	0.785548	-1.03342	0.00573281	down	Molecular Function: scavenger receptor activity (GO:0005044);; Cellular Component: integral component of membrane (GO:0016021);;	K16353|2.0e-239|crg:105326349|K16353 protein sidekick | (RefSeq) protein sidekick-2	deleted in malignant brain tumors 1 protein isoform X2 [Crassostrea gigas]
Cg00277	5.83266	2.54698	1.03506	0.00124391	up	Cellular Component: Golgi apparatus (GO:0005794);; Biological Process: protein glycosylation (GO:0006486);; Cellular Component: integral component of membrane (GO:0016021);; Molecular Function: transferase activity, transferring glycosyl groups (GO:0016757);;	K07819|1.9e-195|crg:105326726|K07819 beta-1,3-galactosyltransferase 1 [EC:2.4.1.86] | (RefSeq) beta-1,3-galactosyltransferase 1	beta-1,3-galactosyltransferase 1 isoform X3 [Crassostrea gigas]
Cg30120	4.3492	18.9315	-1.86917	4.09366e-09	down	Molecular Function: carbohydrate binding (GO:0030246);;	K10074|4.3e-52|crg:105326444|K10074 C-type lectin domain family 7 member A | (RefSeq) C-type lectin domain family 7 member A-like	perlucin-like protein isoform X1 [Crassostrea gigas]
Cg09537	62.5218	25.6042	1.22465	6.45617e-16	up	Biological Process: reproduction (GO:0000003);; Biological Process: protein polyubiquitination (GO:0000209);; Biological Process: ameboidal-type cell migration (GO:0001667);; Biological Process: morphogenesis of an epithelium (GO:0002009);; Molecular Function: protease binding (GO:0002020);; Biological Process: epithelial cell development (GO:0002064);; Biological Process: columnar/cuboidal epith…	K16061|2.4e-70|crg:105340852|K16061 baculoviral IAP repeat-containing protein 7/8 | (RefSeq) baculoviral IAP repeat-containing protein 3-like	baculoviral IAP repeat-containing protein 7-A [Crassostrea gigas]
Crassostrea_gigas_newGene_15913	8.58782	0.685647	1.40774	0.00563799	up	Molecular Function: metal ion binding (GO:0046872);;	--	--
Cg16585	4.00392	9.4142	-1.16886	1.06514e-06	down	Cellular Component: integral component of membrane (GO:0016021);;	K17341|2.1e-13|mze:101486197|K17341 hemicentin | (RefSeq) hemicentin-1	uncharacterized protein LOC105346857 [Crassostrea gigas]
Cg07792	0	2.19907	-2.56664	1.10562e-07	down	--	--	uncharacterized protein LOC117691004 [Crassostrea gigas]
Cg14827	1.66889	17.5152	-2.58809	1.0841e-10	down	--	--	uncharacterized protein LOC105346300 [Crassostrea gigas]
Cg18715	0	0.881593	-4.90228	1.95136e-34	down	Molecular Function: scavenger receptor activity (GO:0005044);;	--	uncharacterized protein LOC109618518 isoform X1 [Crassostrea gigas]
Cg00977	0.838448	3.26746	-1.55216	0.000127698	down	Cellular Component: integral component of membrane (GO:0016021);;	K13297|1.4e-58|crg:105322070|K13297 receptor-type tyrosine-protein phosphatase T [EC:3.1.3.48] | (RefSeq) uncharacterized protein LOC105322070	multiple epidermal growth factor-like domains protein 6 isoform X1 [Crassostrea gigas]
Crassostrea_gigas_newGene_16196	4.10032	0.984701	1.70444	1.26648e-06	up	--	K01183|2.1e-33|lak:106175122|K01183 chitinase [EC:3.2.1.14] | (RefSeq) probable endochitinase	uncharacterized protein LOC105345993 [Crassostrea gigas]
Cg00654	0.309331	3.09569	-2.93516	2.58069e-23	down	Molecular Function: protein tyrosine phosphatase activity (GO:0004725);; Biological Process: protein dephosphorylation (GO:0006470);; Cellular Component: integral component of membrane (GO:0016021);;	K13297|7.1e-278|crg:105344922|K13297 receptor-type tyrosine-protein phosphatase T [EC:3.1.3.48] | (RefSeq) receptor-type tyrosine-protein phosphatase T	receptor-type tyrosine-protein phosphatase epsilon [Crassostrea gigas]
Cg24186	0	6.70012	-3.58526	6.12163e-15	down	Molecular Function: molecular_function (GO:0003674);; Molecular Function: binding (GO:0005488);; Cellular Component: cellular_component (GO:0005575);; Molecular Function: chitin binding (GO:0008061);; Molecular Function: drug binding (GO:0008144);; Cellular Component: membrane (GO:0016020);; Molecular Function: carbohydrate derivative binding (GO:0097367);;	K10104|1.6e-142|crg:105322529|K10104 ficolin | (RefSeq) microfibril-associated glycoprotein 4	microfibril-associated glycoprotein 4-like [Crassostrea gigas]
Cg14233	0.23414	0.982055	-1.7253	8.55984e-07	down	Cellular Component: Golgi membrane (GO:0000139);; Biological Process: protein glycosylation (GO:0006486);; Cellular Component: integral component of membrane (GO:0016021);; Molecular Function: transferase activity, transferring glycosyl groups (GO:0016757);;	K07819|1.6e-97|myi:110449518|K07819 beta-1,3-galactosyltransferase 1 [EC:2.4.1.86] | (RefSeq) beta-1,3-galactosyltransferase 2-like	beta-1,3-galactosyltransferase 1 isoform X3 [Crassostrea gigas]
Cg06192	0.181399	0.0522248	1.24565	0.00797173	up	Cellular Component: collagen trimer (GO:0005581);;	K06238|2.3e-291|crg:105329078|K06238 collagen type VI alpha | (RefSeq) uncharacterized protein LOC105329078 isoform X1	uncharacterized protein LOC105320876 isoform X1 [Crassostrea gigas]
Cg07327	2.64229	8.12511	-1.27124	0.00322558	down	Cellular Component: integral component of membrane (GO:0016021);; Molecular Function: transmembrane transporter activity (GO:0022857);;	K08202|6.6e-273|crg:105331458|K08202 MFS transporter, OCT family, solute carrier family 22 (organic cation transporter), member 4/5 | (RefSeq) organic cation transporter protein-like	uncharacterized protein LOC105331458 isoform X3 [Crassostrea gigas]
Cg06579	2.97277	10.5208	-1.45885	0.000374099	down	Molecular Function: carbonate dehydratase activity (GO:0004089);; Molecular Function: zinc ion binding (GO:0008270);;	K01672|5.2e-190|crg:105333592|K01672 carbonic anhydrase [EC:4.2.1.1] | (RefSeq) carbonic anhydrase 2	carbonic anhydrase 2 [Crassostrea gigas]
Cg25282	6.50482	2.47912	1.19731	0.000332352	up	Biological Process: mRNA export from nucleus (GO:0006406);; Cellular Component: integral component of membrane (GO:0016021);;	K12880|5.5e-116|crg:105336393|K12880 THO complex subunit 3 | (RefSeq) LOW QUALITY PROTEIN: THO complex subunit 3-like	THO complex subunit 3 isoform X1 [Crassostrea gigas]
Crassostrea_gigas_newGene_5365	4.89588	0.537666	2.81554	7.28304e-21	up	--	--	uncharacterized protein LOC105335809 isoform X2 [Crassostrea gigas]
Cg09323	5.62504	0	4.45722	8.555e-23	up	--	--	uncharacterized protein LOC105339751 isoform X1 [Crassostrea gigas]
Crassostrea_gigas_newGene_1934	0.0022525	1.05853	-1.4401	0.00372478	down	--	--	uncharacterized protein LOC105318751 [Crassostrea gigas]
Crassostrea_gigas_newGene_4832	0.0508177	4.76012	-3.2447	9.57428e-13	down	--	--	uncharacterized protein LOC105341986 isoform X2 [Crassostrea gigas]
Crassostrea_gigas_newGene_11526	1.99148	0.910257	1.05999	0.00552952	up	--	K17834|1.5e-08|pret:103472993|K17834 cyclic GMP-AMP synthase [EC:2.7.7.86] | (RefSeq) cyclic GMP-AMP synthase-like	uncharacterized protein LOC117680604 [Crassostrea gigas]
Cg18731	53.4067	13.7873	1.72891	2.8061e-09	up	Cellular Component: integral component of membrane (GO:0016021);;	--	uncharacterized protein LOC117684748 [Crassostrea gigas]
Cg11844	2.5348	0.0732836	3.56396	7.90838e-18	up	--	K22754|1.3e-09|spis:111338202|K22754 E3 ubiquitin-protein ligase RNF213 [EC:2.3.2.27] | (RefSeq) E3 ubiquitin-protein ligase RNF213-like	uncharacterized protein LOC105318975 isoform X2 [Crassostrea gigas]
Cg00966	1.29186	7.89883	-2.42369	5.84289e-22	down	Molecular Function: protein tyrosine phosphatase activity (GO:0004725);; Biological Process: protein dephosphorylation (GO:0006470);; Cellular Component: integral component of membrane (GO:0016021);;	K13297|7.1e-278|crg:105344922|K13297 receptor-type tyrosine-protein phosphatase T [EC:3.1.3.48] | (RefSeq) receptor-type tyrosine-protein phosphatase T	receptor-type tyrosine-protein phosphatase epsilon [Crassostrea gigas]
Cg27829	7.02718	2.25435	1.56944	4.59855e-27	up	Biological Process: biosynthetic process (GO:0009058);; Molecular Function: transferase activity (GO:0016740);; Molecular Function: pyridoxal phosphate binding (GO:0030170);;	K00654|9.2e-227|crg:105318204|K00654 serine palmitoyltransferase [EC:2.3.1.50] | (RefSeq) serine palmitoyltransferase 2 isoform X1	serine palmitoyltransferase 2 [Crassostrea gigas]
Crassostrea_gigas_newGene_16263	1.34823	7.18366	-1.86531	5.75529e-06	down	Molecular Function: zinc ion binding (GO:0008270);;	K12035|7.4e-232|crg:105317084|K12035 tripartite motif-containing protein 71 [EC:2.3.2.27] | (RefSeq) uncharacterized protein LOC105317084	uncharacterized protein LOC109617885 [Crassostrea gigas]
Cg02886	0.233537	0.514824	-1.0288	0.00143425	down	--	K16726|6.8e-152|crg:105330604|K16726 ankyrin repeat domain-containing protein 17 | (RefSeq) uncharacterized protein LOC105330604	uncharacterized protein LOC105335148 isoform X1 [Crassostrea gigas]
Cg01889	0.0647995	2.00178	-1.96602	7.82969e-05	down	Molecular Function: protein tyrosine phosphatase activity (GO:0004725);;	K06776|6.5e-212|crg:105345976|K06776 receptor-type tyrosine-protein phosphatase kappa [EC:3.1.3.48] | (RefSeq) receptor-type tyrosine-protein phosphatase F-like	uncharacterized protein LOC117686791 [Crassostrea gigas]
Cg20369	2.53037	6.77621	-1.21061	0.00097379	down	Molecular Function: protein serine/threonine kinase activity (GO:0004674);; Molecular Function: ATP binding (GO:0005524);;	K12567|1.0e-19|mgp:100546807|K12567 titin [EC:2.7.11.1] | (RefSeq) TTN; LOW QUALITY PROTEIN: titin	peroxidasin homolog isoform X1 [Crassostrea gigas]
Crassostrea_gigas_newGene_7043	5.41016	2.14747	1.12236	0.00136429	up	Molecular Function: zinc ion binding (GO:0008270);;	K12035|5.9e-160|crg:105325102|K12035 tripartite motif-containing protein 71 [EC:2.3.2.27] | (RefSeq) uncharacterized protein LOC105325102	E3 ubiquitin-protein ligase TRIM71-like isoform X2 [Crassostrea gigas]
Cg19565	0.543172	4.54213	-2.65927	3.97431e-17	down	Molecular Function: kinase activity (GO:0016301);;	K05088|2.3e-11|bbub:102397057|K05088 proto-oncogene tyrosine-protein kinase ROS [EC:2.7.10.1] | (RefSeq) ROS1; proto-oncogene tyrosine-protein kinase ROS isoform X1	uncharacterized protein LOC105324997 isoform X1 [Crassostrea gigas]
Crassostrea_gigas_newGene_11706	405.102	0.112986	1.86329	9.51111e-05	up	--	--	AT-rich interactive domain-containing protein 1B [Crassostrea gigas]
Cg09618	2.3797	10.2718	-2.0147	1.90045e-21	down	Molecular Function: aminopeptidase activity (GO:0004177);; Molecular Function: metallopeptidase activity (GO:0008237);; Molecular Function: zinc ion binding (GO:0008270);;	K11140|0.0e+00|crg:105330954|K11140 aminopeptidase N [EC:3.4.11.2] | (RefSeq) aminopeptidase N	aminopeptidase N [Crassostrea gigas]
Cg26341	4.50369	1.63841	1.24215	0.00030253	up	Molecular Function: molecular_function (GO:0003674);; Molecular Function: receptor binding (GO:0005102);; Molecular Function: binding (GO:0005488);; Molecular Function: protein binding (GO:0005515);; Cellular Component: cellular_component (GO:0005575);; Cellular Component: intracellular (GO:0005622);; Cellular Component: cell (GO:0005623);; Cellular Component: nucleus (GO:0005634);; Cellular Comp…	K17592|0.0e+00|nve:5519666|K17592 sacsin | (RefSeq) sacsin	sacsin-like isoform X1 [Crassostrea gigas]
Cg29209	1.69765	0.548707	1.4378	1.41804e-06	up	Molecular Function: nucleic acid binding (GO:0003676);; Molecular Function: helicase activity (GO:0004386);; Molecular Function: ATP binding (GO:0005524);;	K03654|1.2e-108|lak:106172806|K03654 ATP-dependent DNA helicase RecQ [EC:3.6.4.12] | (RefSeq) uncharacterized protein LOC106172806	ATP-dependent DNA helicase Q-like 3 [Crassostrea gigas]
Crassostrea_gigas_newGene_5093	0.0339378	3.37623	-3.56163	5.89354e-16	down	Cellular Component: integral component of membrane (GO:0016021);;	K16680|3.9e-32|crg:105338026|K16680 echinoid | (RefSeq) hemicentin-2 isoform X1	hemicentin-1 isoform X3 [Crassostrea gigas]
Crassostrea_gigas_newGene_15624	9.29306	2.13472	1.75986	1.76912e-08	up	Molecular Function: arylformamidase activity (GO:0004061);; Biological Process: tryptophan catabolic process to kynurenine (GO:0019441);;	--	isatin hydrolase [Crassostrea gigas]
Cg24653	5.98707	17.586	-1.21037	0.00571074	down	Molecular Function: monooxygenase activity (GO:0004497);; Molecular Function: iron ion binding (GO:0005506);; Cellular Component: integral component of membrane (GO:0016021);; Molecular Function: oxidoreductase activity, acting on paired donors, with incorporation or reduction of molecular oxygen (GO:0016705);; Molecular Function: lyase activity (GO:0016829);; Molecular Function: heme binding (GO…	K00512|3.3e-269|crg:105346187|K00512 steroid 17alpha-monooxygenase / 17alpha-hydroxyprogesterone deacetylase [EC:1.14.14.19 1.14.14.32] | (RefSeq) steroid 17-alpha-hydroxylase/17,20 lyase	steroid 17-alpha-hydroxylase/17,20 lyase isoform X1 [Crassostrea gigas]
Cg09230	0.376827	1.81921	-2.14609	2.36132e-21	down	Biological Process: apoptotic process (GO:0006915);;	K02599|8.1e-65|spis:111337481|K02599 Notch 1 | (RefSeq) uncharacterized protein LOC111337481 isoform X1	uncharacterized protein LOC105336706 isoform X3 [Crassostrea gigas]
Cg02680	6.60055	29.6995	-1.64286	0.000113271	down	--	--	uncharacterized protein LOC117688208 [Crassostrea gigas]
Cg06267	0.243271	2.6749	-2.30337	2.92387e-07	down	--	--	uncharacterized protein LOC109617529 [Crassostrea gigas]
Cg16555	3.14267	0.740336	1.33835	0.00669156	up	--	K12183|6.5e-17|pmur:107290713|K12183 ESCRT-I complex subunit TSG101 | (RefSeq) TSG101; tumor susceptibility gene 101 protein isoform X1	uncharacterized protein LOC117692458 [Crassostrea gigas]
Crassostrea_gigas_newGene_3259	30.7806	113.402	-1.69535	1.3853e-08	down	Molecular Function: molecular_function (GO:0003674);; Molecular Function: structural molecule activity (GO:0005198);; Molecular Function: extracellular matrix structural constituent (GO:0005201);; Cellular Component: cellular_component (GO:0005575);; Cellular Component: extracellular region (GO:0005576);; Molecular Function: extracellular matrix constituent conferring elasticity (GO:0030023);; Mo…	K23284|5.4e-85|crg:105339168|K23284 C1q-related factor | (RefSeq) heavy metal-binding protein HIP-like isoform X2	heavy metal-binding protein HIP-like [Crassostrea gigas]
Cg28735	98.3743	45.6028	1.04694	2.01484e-09	up	Cellular Component: cytoplasm (GO:0005737);; Molecular Function: metallopeptidase activity (GO:0008237);; Molecular Function: dipeptidyl-peptidase activity (GO:0008239);; Molecular Function: metal ion binding (GO:0046872);;	K01277|0.0e+00|crg:105348163|K01277 dipeptidyl-peptidase III [EC:3.4.14.4] | (RefSeq) dipeptidyl peptidase 3 isoform X1	dipeptidyl peptidase 3 isoform X1 [Crassostrea gigas]
Crassostrea_gigas_newGene_11465	8.06857	0.256584	2.51894	1.81844e-07	up	--	K16726|1.2e-37|crg:105330604|K16726 ankyrin repeat domain-containing protein 17 | (RefSeq) uncharacterized protein LOC105330604	uncharacterized protein LOC117688434 [Crassostrea gigas]
Cg05999	62.872	2.2735	4.5364	2.10812e-127	up	Biological Process: glutathione catabolic process (GO:0006751);; Cellular Component: integral component of membrane (GO:0016021);; Molecular Function: glutathione hydrolase activity (GO:0036374);;	K18592|0.0e+00|crg:105346832|K18592 gamma-glutamyltranspeptidase / glutathione hydrolase / leukotriene-C4 hydrolase [EC:2.3.2.2 3.4.19.13 3.4.19.14] | (RefSeq) gamma-glutamyltranspeptidase 1 isoform X1	glutathione hydrolase 1 proenzyme-like isoform X3 [Crassostrea gigas]
Crassostrea_gigas_newGene_8762	8.34504	1.34468	1.80489	7.8502e-05	up	Cellular Component: integral component of membrane (GO:0016021);;	K18405|8.9e-09|crg:105342062|K18405 tudor domain-containing protein 1/4/6/7 | (RefSeq) uncharacterized protein LOC105342062 isoform X1	--
Crassostrea_gigas_newGene_13141	4.63966	1.23157	1.72586	2.83732e-11	up	--	K09258|5.7e-09|sanh:107657696|K09258 B-cell CLL/lymphoma protein 3 | (RefSeq) B-cell lymphoma 3 protein homolog isoform X1	serine/threonine-protein phosphatase 6 regulatory ankyrin repeat subunit A [Crassostrea gigas]
Cg14520	7.36677	1.17755	2.37623	1.12112e-19	up	Biological Process: cellular amino acid metabolic process (GO:0006520);; Molecular Function: carboxy-lyase activity (GO:0016831);; Molecular Function: pyridoxal phosphate binding (GO:0030170);;	K01593|2.7e-283|crg:105320937|K01593 aromatic-L-amino-acid/L-tryptophan decarboxylase [EC:4.1.1.28 4.1.1.105] | (RefSeq) aromatic-L-amino-acid decarboxylase	aromatic-L-amino-acid decarboxylase [Crassostrea gigas]
Cg08104	3.61608	0.0806107	4.39719	3.97139e-36	up	Cellular Component: integral component of membrane (GO:0016021);;	K12385|1.1e-57|epa:110236360|K12385 Niemann-Pick C1 protein | (RefSeq) patched domain-containing protein 3	patched domain-containing protein 3-like isoform X1 [Crassostrea gigas]
Cg08244	14.9917	3.90656	1.60463	1.06347e-05	up	--	--	uncharacterized protein LOC105343660 [Crassostrea gigas]
Cg15976	0.597928	1.67125	-1.39773	1.07553e-08	down	Molecular Function: extracellular ligand-gated ion channel activity (GO:0005230);; Biological Process: ion transport (GO:0006811);; Cellular Component: integral component of membrane (GO:0016021);;	K05194|8.6e-69|myi:110449554|K05194 glycine receptor alpha-2 | (RefSeq) glycine receptor subunit alpha-2-like	heat shock 70 kDa protein 12A isoform X1 [Crassostrea gigas]
Cg07170	0.633305	0.283444	1.0221	0.000251031	up	Biological Process: protein homooligomerization (GO:0051260);;	K10104|1.9e-142|crg:105318732|K10104 ficolin | (RefSeq) ficolin-2	uncharacterized protein LOC117689924 [Crassostrea gigas]
Crassostrea_gigas_newGene_6991	4.95601	0.588902	2.72554	3.00607e-33	up	Molecular Function: zinc ion binding (GO:0008270);;	K12026|2.2e-29|myi:110450306|K12026 tripartite motif-containing protein 56 [EC:2.3.2.27] | (RefSeq) E3 ubiquitin-protein ligase TRIM56-like	uncharacterized protein LOC105321375 [Crassostrea gigas]
Crassostrea_gigas_newGene_14049	0.281935	1.33344	-1.37079	0.00621714	down	Molecular Function: transcription factor activity, sequence-specific DNA binding (GO:0003700);; Cellular Component: nucleus (GO:0005634);; Molecular Function: zinc ion binding (GO:0008270);; Cellular Component: host cell nucleus (GO:0042025);; Molecular Function: sequence-specific DNA binding (GO:0043565);;	K21754|3.2e-07|crg:105323828|K21754 BTB/POZ domain-containing protein KCTD1/15 | (RefSeq) uncharacterized protein LOC105323828	glutamine-rich protein 1-like [Crassostrea gigas]
Cg13517	1.64123	0.457105	1.56759	1.77617e-06	up	Molecular Function: nucleic acid binding (GO:0003676);; Molecular Function: zinc ion binding (GO:0008270);; Biological Process: DNA integration (GO:0015074);;	K00432|6.0e-143|spu:105437350|K00432 glutathione peroxidase [EC:1.11.1.9] | (RefSeq) glutathione peroxidase 7-like	uncharacterized protein K02A2.6-like [Crassostrea gigas]
Cg30118	4.41124	0.0881173	3.76617	1.32407e-18	up	Molecular Function: carbohydrate binding (GO:0030246);;	K10074|2.0e-89|crg:105326444|K10074 C-type lectin domain family 7 member A | (RefSeq) C-type lectin domain family 7 member A-like	C-type lectin domain family 7 member A-like [Crassostrea gigas]
Cg17027	1.13613	14.3276	-2.10099	1.2463e-05	down	Biological Process: glutathione catabolic process (GO:0006751);; Molecular Function: transferase activity (GO:0016740);; Molecular Function: glutathione hydrolase activity (GO:0036374);;	K00681|2.3e-225|myi:110446456|K00681 gamma-glutamyltranspeptidase / glutathione hydrolase [EC:2.3.2.2 3.4.19.13] | (RefSeq) uncharacterized protein LOC110446456 isoform X1	glutathione hydrolase-like YwrD proenzyme [Crassostrea gigas]
Crassostrea_gigas_newGene_2752	3.4562	0.180493	3.45367	3.48048e-24	up	Molecular Function: nucleic acid binding (GO:0003676);;	K09488|6.4e-14|lgi:LOTGIDRAFT_237567|K09488 TNF receptor-associated protein 1 | (RefSeq) hypothetical protein	uncharacterized protein LOC109618220 [Crassostrea gigas]
Cg04486	3.08148	0.429747	2.47201	1.12558e-16	up	Molecular Function: DNA binding (GO:0003677);; Cellular Component: integral component of membrane (GO:0016021);;	K23206|2.2e-130|crg:105330345|K23206 THAP domain-containing protein 5/8 | (RefSeq) THAP domain-containing protein 5	uncharacterized protein LOC105348993 isoform X1 [Crassostrea gigas]
Crassostrea_gigas_newGene_6735	2.61212	7.5218	-1.45156	2.702e-11	down	--	--	glyoxalase domain-containing protein 5 isoform X2 [Crassostrea gigas]
Cg20300	2.64039	1.14657	1.05585	0.000680187	up	Cellular Component: integral component of membrane (GO:0016021);;	K01316|7.7e-20|nve:5511246|K01316 enterokinase [EC:3.4.21.9] | (RefSeq) MAM and LDL-receptor class A domain-containing protein 1	uncharacterized protein LOC105320585 [Crassostrea gigas]
Cg29879	3.8835	0.977896	1.35345	0.00492067	up	Cellular Component: integral component of membrane (GO:0016021);;	--	uncharacterized protein LOC109619489 [Crassostrea gigas]
Cg13048	5.22499	1.53838	1.67774	7.4611e-24	up	Molecular Function: transmembrane signaling receptor activity (GO:0004888);; Molecular Function: extracellular ligand-gated ion channel activity (GO:0005230);; Cellular Component: integral component of membrane (GO:0016021);;	K05312|1.6e-84|crg:105333547|K05312 nicotinic acetylcholine receptor, invertebrate | (RefSeq) acetylcholine receptor subunit alpha-like	acetylcholine receptor subunit alpha [Crassostrea gigas]
Cg10535	0.140576	1.37249	-1.68161	0.000814554	down	--	--	uncharacterized protein LOC117691581 [Crassostrea gigas]
Cg21416	42.9823	19.1169	1.09362	2.00376e-09	up	Molecular Function: transmembrane signaling receptor activity (GO:0004888);; Molecular Function: calcium ion binding (GO:0005509);; Biological Process: cell-matrix adhesion (GO:0007160);; Cellular Component: integral component of membrane (GO:0016021);;	K22017|5.9e-298|crg:105348997|K22017 mucin-4 | (RefSeq) mucin-4-like	uncharacterized protein LOC111125444 [Crassostrea virginica]
Cg01921	0.167879	0.945115	-1.69409	0.000231616	down	Molecular Function: protein tyrosine phosphatase activity (GO:0004725);;	K13297|0.0e+00|crg:105344922|K13297 receptor-type tyrosine-protein phosphatase T [EC:3.1.3.48] | (RefSeq) receptor-type tyrosine-protein phosphatase T	receptor-type tyrosine-protein phosphatase mu-like isoform X2 [Crassostrea gigas]
Cg09135	0.828598	0.214755	1.54474	6.41662e-05	up	Cellular Component: integral component of membrane (GO:0016021);;	--	uncharacterized protein LOC117692162 isoform X1 [Crassostrea gigas]
Cg09691	2.00205	5.43015	-1.30778	7.23376e-06	down	Biological Process: toll-like receptor signaling pathway (GO:0002224);; Molecular Function: transmembrane signaling receptor activity (GO:0004888);; Biological Process: immune response (GO:0006955);; Cellular Component: integral component of membrane (GO:0016021);;	K10059|2.6e-84|crg:105318716|K10059 C-type lectin domain family 4 member E | (RefSeq) C-type lectin mannose-binding isoform	toll-like receptor 4 isoform X1 [Crassostrea gigas]
Crassostrea_gigas_newGene_3714	0.087998	1.0821	-2.40549	2.79801e-08	down	Molecular Function: nucleic acid binding (GO:0003676);; Molecular Function: zinc ion binding (GO:0008270);; Biological Process: DNA integration (GO:0015074);;	K23593|6.9e-38|cpic:101941368|K23593 alpha-2-macroglobulin-like protein | (RefSeq) uncharacterized LOC101941368	uncharacterized protein LOC117687375 [Crassostrea gigas]
Crassostrea_gigas_newGene_10507	0.0292483	3.06696	-1.32271	0.00781188	down	--	--	uncharacterized protein LOC105331260 isoform X2 [Crassostrea gigas]
Cg14657	6.72235	1.80001	1.73254	4.98666e-12	up	Biological Process: toll-like receptor signaling pathway (GO:0002224);; Molecular Function: transmembrane signaling receptor activity (GO:0004888);; Molecular Function: protein binding (GO:0005515);; Biological Process: immune response (GO:0006955);; Biological Process: signal transduction (GO:0007165);; Cellular Component: integral component of membrane (GO:0016021);;	K05398|2.1e-116|myi:110446164|K05398 toll-like receptor 1 | (RefSeq) toll-like receptor 1	toll-like receptor 4 isoform X1 [Crassostrea gigas]
Cg21254	56.1176	414.496	-2.07215	2.17594e-06	down	Molecular Function: structural constituent of ribosome (GO:0003735);; Cellular Component: ribosome (GO:0005840);; Biological Process: translational elongation (GO:0006414);;	K02942|5.3e-33|crg:105329912|K02942 large subunit ribosomal protein LP1 | (RefSeq) 60S acidic ribosomal protein P1	60S acidic ribosomal protein P1 [Crassostrea gigas]
Cg05680	1.39677	3.59067	-1.20148	0.000246775	down	Biological Process: cell adhesion (GO:0007155);; Cellular Component: integral component of membrane (GO:0016021);; Biological Process: tissue regeneration (GO:0042246);;	--	uncharacterized protein LOC105325179 [Crassostrea gigas]
Cg22878	0.147783	1.10576	-2.37681	1.13735e-11	down	Molecular Function: peroxidase activity (GO:0004601);; Biological Process: response to oxidative stress (GO:0006979);; Molecular Function: heme binding (GO:0020037);;	K19511|0.0e+00|crg:105341168|K19511 peroxidase [EC:1.11.1.7] | (RefSeq) peroxidase-like protein	peroxidase-like protein [Crassostrea gigas]
Crassostrea_gigas_newGene_15002	0.339507	1.08969	-1.33794	0.00143322	down	Molecular Function: scavenger receptor activity (GO:0005044);;	K06776|2.5e-43|crg:105346217|K06776 receptor-type tyrosine-protein phosphatase kappa [EC:3.1.3.48] | (RefSeq) receptor-type tyrosine-protein phosphatase epsilon	neurogenic locus notch homolog protein 1 [Crassostrea gigas]
Crassostrea_gigas_newGene_5497	0	3.68871	-6.23093	2.44096e-62	down	--	K11997|1.9e-221|crg:109619606|K11997 tripartite motif-containing protein 2/3 | (RefSeq) uncharacterized protein LOC109619606	uncharacterized protein LOC117687369 [Crassostrea gigas]
Cg26803	7.96047	0.50143	3.46196	1.02991e-30	up	--	--	uncharacterized protein LOC105345671 isoform X4 [Crassostrea gigas]
Cg12014	13.5193	29.4463	-1.09181	7.40793e-08	down	Cellular Component: integral component of membrane (GO:0016021);;	--	uncharacterized protein LOC105321918 isoform X1 [Crassostrea gigas]
Cg00167	6.74577	1.04071	2.07446	2.7019e-07	up	--	--	multiple epidermal growth factor-like domains protein 10 isoform X4 [Crassostrea gigas]
Cg17774	0.754126	0	6.18251	7.3085e-61	up	Molecular Function: channel activity (GO:0015267);; Cellular Component: integral component of membrane (GO:0016021);;	K09869|5.8e-136|crg:105334792|K09869 aquaporin-8 | (RefSeq) aquaporin-8-like	aquaporin-8-like [Crassostrea gigas]
Cg18877	4.04924	0	4.86862	2.19671e-29	up	Molecular Function: hydrolase activity, hydrolyzing O-glycosyl compounds (GO:0004553);; Cellular Component: extracellular region (GO:0005576);; Biological Process: carbohydrate metabolic process (GO:0005975);; Molecular Function: chitin binding (GO:0008061);;	K01183|1.2e-48|crg:105331572|K01183 chitinase [EC:3.2.1.14] | (RefSeq) acidic mammalian chitinase isoform X1	probable endochitinase [Crassostrea gigas]
Crassostrea_gigas_newGene_1446	0.008898	1.23854	-3.55972	1.78129e-15	down	Biological Process: DNA integration (GO:0015074);; Cellular Component: integral component of membrane (GO:0016021);;	K06461|3.7e-12|sfm:114909219|K06461 integrin alpha M | (RefSeq) integrin alpha-M-like	unnamed protein product [Mytilus coruscus]
Cg06667	162.837	446.156	-1.43084	3.98969e-17	down	Molecular Function: catalytic activity (GO:0003824);; Biological Process: transsulfuration (GO:0019346);; Molecular Function: pyridoxal phosphate binding (GO:0030170);;	--	uncharacterized protein LOC105344974 [Crassostrea gigas]
Cg26483	3.21908	0.601827	1.47535	0.00305653	up	Molecular Function: hydrolase activity (GO:0016787);;	K06999|1.6e-132|crg:105328053|K06999 phospholipase/carboxylesterase | (RefSeq) lysophospholipase-like protein 1	lysophospholipase-like protein 1 [Crassostrea gigas]
Cg10148	2.25499	0.607946	1.77049	6.11697e-22	up	Molecular Function: catalytic activity (GO:0003824);;	K23617|6.6e-52|adf:107338061|K23617 medium-chain acyl-CoA ligase, mitochondrial [EC:6.2.1.2] | (RefSeq) acyl-CoA synthetase family member 2, mitochondrial-like	medium-chain acyl-CoA ligase ACSF2, mitochondrial [Crassostrea gigas]
Cg29965	18.2984	8.55904	1.02708	2.23577e-08	up	--	K22203|6.5e-24|aga:AgaP_AGAP003095|K22203 dopachrome tautomerase [EC:5.3.3.12] | (RefSeq) AGAP003095-PA	MRJP-domain containing protein [Crassostrea gigas]
Crassostrea_gigas_newGene_6374	0.743127	3.06353	-1.6551	6.59394e-07	down	Molecular Function: zinc ion binding (GO:0008270);;	K12035|2.8e-137|crg:105342970|K12035 tripartite motif-containing protein 71 [EC:2.3.2.27] | (RefSeq) uncharacterized protein LOC105342970 isoform X1	tripartite motif-containing protein 45-like [Crassostrea gigas]
Cg26562	11.2365	2.14814	1.3852	0.00667577	up	--	--	beta-microseminoprotein [Crassostrea gigas]
Cg06329	0.889649	0.187269	1.592	0.000451302	up	Molecular Function: iron ion binding (GO:0005506);; Molecular Function: oxidoreductase activity, acting on paired donors, with incorporation or reduction of molecular oxygen (GO:0016705);; Molecular Function: heme binding (GO:0020037);;	K07418|3.5e-108|myi:110454048|K07418 cytochrome P450 family 2 subfamily J [EC:1.14.14.1 1.14.14.73 1.14.14.74 1.14.14.75] | (RefSeq) cytochrome P450 2J2-like	cytochrome P450 2B19 [Crassostrea gigas]
Crassostrea_gigas_newGene_2781	11.3804	4.1447	1.56254	1.95898e-29	up	Molecular Function: zinc ion binding (GO:0008270);;	K11997|3.1e-246|crg:105326056|K11997 tripartite motif-containing protein 2/3 | (RefSeq) tripartite motif-containing protein 55	E3 ubiquitin-protein ligase TRIM71-like [Crassostrea gigas]
Cg27342	17.3423	6.34366	1.27449	2.10038e-05	up	Molecular Function: O-methyltransferase activity (GO:0008171);; Biological Process: methylation (GO:0032259);;	K00545|1.5e-07|oaa:100092373|K00545 catechol O-methyltransferase [EC:2.1.1.6] | (RefSeq) catechol O-methyltransferase A	probable caffeoyl-CoA O-methyltransferase 1 [Crassostrea gigas]
Crassostrea_gigas_newGene_682	0	15.3578	-3.95534	2.73335e-18	down	--	--	uncharacterized protein LOC105321263 isoform X2 [Crassostrea gigas]
Cg04308	5.92583	13.6085	-1.15668	8.93065e-07	down	Cellular Component: integral component of membrane (GO:0016021);; Molecular Function: transmembrane transporter activity (GO:0022857);;	K14445|3.9e-272|crg:105327125|K14445 solute carrier family 13 (sodium-dependent dicarboxylate transporter), member 2/3/5 | (RefSeq) solute carrier family 13 member 5 isoform X1	solute carrier family 13 member 5 isoform X1 [Crassostrea gigas]
Cg20892	1.52314	3.89749	-1.13721	0.00270075	down	Molecular Function: sulfotransferase activity (GO:0008146);;	K22523|3.4e-175|crg:105324642|K22523 sulfotransferase 6B1 [EC:2.8.2.-] | (RefSeq) sulfotransferase family cytosolic 1B member 1	sulfotransferase family cytosolic 1B member 1 isoform X4 [Crassostrea gigas]
Crassostrea_gigas_newGene_12440	22.5429	2.37382	2.40414	7.13151e-09	up	--	K11997|1.2e-40|crg:109619606|K11997 tripartite motif-containing protein 2/3 | (RefSeq) uncharacterized protein LOC109619606	uncharacterized protein LOC105328450 [Crassostrea gigas]
Cg06599	2.32173	0.515636	1.41326	0.00380928	up	--	--	uncharacterized protein LOC109619320 [Crassostrea gigas]
Cg15728	28.1343	2.76881	2.28085	4.10763e-07	up	--	K23284|3.1e-74|crg:105343639|K23284 C1q-related factor | (RefSeq) complement C1q tumor necrosis factor-related protein 2	multimerin-2-like [Crassostrea gigas]
Cg29398	4.67563	1.78319	1.12473	0.00390171	up	Molecular Function: zinc ion binding (GO:0008270);; Molecular Function: N-acetylmuramoyl-L-alanine amidase activity (GO:0008745);; Biological Process: peptidoglycan catabolic process (GO:0009253);; Molecular Function: peptidoglycan binding (GO:0042834);; Biological Process: innate immune response (GO:0045087);;	K01446|1.2e-44|ame:412484|K01446 peptidoglycan recognition protein | (RefSeq) Pgrp-s2; peptidoglycan-recognition protein S2 precursor	peptidoglycan recognition protein isoform X1 [Crassostrea gigas]
Crassostrea_gigas_newGene_9820	0.579776	5.05992	-2.50987	1.36028e-11	down	Biological Process: system process (GO:0003008);; Molecular Function: molecular_function (GO:0003674);; Molecular Function: receptor binding (GO:0005102);; Molecular Function: binding (GO:0005488);; Molecular Function: protein binding (GO:0005515);; Cellular Component: cellular_component (GO:0005575);; Cellular Component: extracellular region (GO:0005576);; Cellular Component: intracellular (GO:0…	K23284|2.4e-24|crg:105317520|K23284 C1q-related factor | (RefSeq) complement C1q-like protein 4	complement C1q tumor necrosis factor-related protein 6 [Crassostrea gigas]
Cg21940	1.27186	6.38461	-2.10053	3.49665e-13	down	Molecular Function: carboxypeptidase activity (GO:0004180);; Molecular Function: metallopeptidase activity (GO:0008237);; Molecular Function: peptidyl-dipeptidase activity (GO:0008241);; Cellular Component: membrane (GO:0016020);; Molecular Function: metal ion binding (GO:0046872);;	K01283|1.2e-257|myi:110457180|K01283 peptidyl-dipeptidase A [EC:3.4.15.1] | (RefSeq) angiotensin-converting enzyme-like isoform X1	angiotensin-converting enzyme-like isoform X2 [Crassostrea gigas]
Cg13308	2.44862	0.235926	2.53667	5.48915e-10	up	Biological Process: platelet degranulation (GO:0002576);; Molecular Function: molecular_function (GO:0003674);; Molecular Function: catalytic activity (GO:0003824);; Molecular Function: transporter activity (GO:0005215);; Molecular Function: ATP binding (GO:0005524);; Cellular Component: cellular_component (GO:0005575);; Cellular Component: intracellular (GO:0005622);; Cellular Component: cell (G…	K05673|0.0e+00|crg:105337545|K05673 ATP-binding cassette, subfamily C (CFTR/MRP), member 4 | (RefSeq) multidrug resistance-associated protein 4-like isoform X2	multidrug resistance-associated protein 4-like [Crassostrea gigas]
Cg30259	15.3744	53.062	-1.67415	5.34292e-11	down	Cellular Component: membrane (GO:0016020);; Cellular Component: integral component of membrane (GO:0016021);;	K01316|4.5e-23|adf:107340983|K01316 enterokinase [EC:3.4.21.9] | (RefSeq) MAM and LDL-receptor class A domain-containing protein 1-like	MAM and LDL-receptor class A domain-containing protein 2-like [Crassostrea virginica]
Cg25394	0.321794	2.79037	-1.36401	0.00875682	down	Molecular Function: methyltransferase activity (GO:0008168);; Biological Process: methylation (GO:0032259);;	K11433|2.6e-31|cfo:105258654|K11433 [histone H3]-lysine36 N-dimethyltransferase SETMAR [EC:2.1.1.357] | (RefSeq) histone-lysine N-methyltransferase SETMAR-like	uncharacterized protein LOC105324448 [Crassostrea gigas]
Crassostrea_gigas_newGene_15684	4.57236	2.02531	1.09189	2.26918e-07	up	Molecular Function: protein binding (GO:0005515);; Biological Process: biological_process (GO:0008150);; Biological Process: regulation of circadian rhythm (GO:0042752);; Biological Process: regulation of biological process (GO:0050789);; Biological Process: biological regulation (GO:0065007);;	--	uncharacterized protein LOC105321582 [Crassostrea gigas]
Crassostrea_gigas_newGene_270	5.44222	0	4.85364	3.24051e-27	up	--	--	uncharacterized protein LOC114973917 [Acropora millepora]
Cg17402	1.80507	17.5873	-2.72745	6.22414e-15	down	Cellular Component: integral component of membrane (GO:0016021);; Molecular Function: carbohydrate binding (GO:0030246);;	K23284|3.0e-39|crg:105338226|K23284 C1q-related factor | (RefSeq) uncharacterized protein LOC105338226	uncharacterized protein LOC105341677 [Crassostrea gigas]
Cg11055	29.4713	2.80062	2.39221	4.26106e-08	up	Cellular Component: integral component of membrane (GO:0016021);;	--	cysteine and tyrosine-rich protein 1-like isoform X2 [Crassostrea gigas]
Cg25495	14.2792	71.3275	-1.73521	5.79845e-05	down	Cellular Component: collagen trimer (GO:0005581);;	--	uncharacterized protein LOC117690337 isoform X1 [Crassostrea gigas]
Cg15187	6.20642	1.2996	2.1821	1.00521e-78	up	Molecular Function: endonuclease activity (GO:0004519);; Biological Process: DNA repair (GO:0006281);;	K03349|4.4e-94|crg:105339470|K03349 anaphase-promoting complex subunit 2 | (RefSeq) anaphase-promoting complex subunit 2	uncharacterized protein LOC105338750 isoform X4 [Crassostrea gigas]
Cg20735	0.714304	1.81759	-1.1247	0.00416876	down	Cellular Component: proton-transporting V-type ATPase, V1 domain (GO:0033180);; Biological Process: regulation of apoptotic process (GO:0042981);; Molecular Function: proton-transporting ATPase activity, rotational mechanism (GO:0046961);;	--	uncharacterized protein LOC105323171 isoform X5 [Crassostrea gigas]
Cg25463	0.336556	1.15871	-1.64606	4.03626e-10	down	--	K15261|1.6e-22|sgh:107552063|K15261 poly [ADP-ribose] polymerase 10/14/15 [EC:2.4.2.30] | (RefSeq) poly [ADP-ribose] polymerase 14-like isoform X1	uncharacterized protein LOC105333697 isoform X2 [Crassostrea gigas]
Cg00961	0.604454	1.60716	-1.19236	0.00156882	down	Molecular Function: protein tyrosine phosphatase activity (GO:0004725);; Cellular Component: integral component of membrane (GO:0016021);;	K13297|8.2e-173|crg:105322070|K13297 receptor-type tyrosine-protein phosphatase T [EC:3.1.3.48] | (RefSeq) uncharacterized protein LOC105322070	receptor-type tyrosine-protein phosphatase epsilon [Crassostrea gigas]
Crassostrea_gigas_newGene_15539	0.295841	4.56086	-2.52798	2.01752e-08	down	Molecular Function: DNA binding (GO:0003677);; Biological Process: DNA recombination (GO:0006310);; Biological Process: DNA integration (GO:0015074);;	--	uncharacterized protein LOC105342884 isoform X1 [Crassostrea gigas]
Cg13152	0	2.36289	-4.34741	3.11466e-25	down	Cellular Component: integral component of membrane (GO:0016021);;	--	uncharacterized protein LOC109619227 isoform X2 [Crassostrea gigas]
Cg12758	0.231165	1.0467	-1.80932	5.84258e-07	down	--	K10609|2.8e-11|amex:111188264|K10609 cullin 4 | (RefSeq) LOW QUALITY PROTEIN: cullin-4A-like	heat shock 70 kDa protein 12A [Crassostrea gigas]
Crassostrea_gigas_newGene_14926	1.13098	0.0756766	1.39279	0.00580344	up	Molecular Function: DNA binding (GO:0003677);;	K06563|1.5e-19|crg:105345403|K06563 C-type lectin domain family 4 member M | (RefSeq) lectin BRA-3	uncharacterized protein LOC105317717 [Crassostrea gigas]
Cg27992	6.34014	17.1364	-1.31759	6.03699e-06	down	Biological Process: reproduction (GO:0000003);; Biological Process: urogenital system development (GO:0001655);; Biological Process: morphogenesis of a branching structure (GO:0001763);; Molecular Function: fibronectin binding (GO:0001968);; Biological Process: morphogenesis of an epithelium (GO:0002009);; Biological Process: developmental process involved in reproduction (GO:0003006);; Biologica…	K10104|3.2e-130|crg:105329191|K10104 ficolin | (RefSeq) ryncolin-4 isoform X2	fibroleukin isoform X1 [Crassostrea gigas]
Cg06272	0.494377	1.19494	-1.1568	0.000117153	down	Cellular Component: integral component of membrane (GO:0016021);;	--	uncharacterized protein LOC105320602 isoform X1 [Crassostrea gigas]
Cg07183	7.86298	20.1302	-1.31688	2.06196e-10	down	--	K17981|9.0e-52|fch:102055515|K17981 mitochondrial fission process protein 1 | (RefSeq) SEC14L2; SEC14-like protein 2 isoform X1	retinal-binding protein isoform X1 [Crassostrea gigas]
Cg03898	5.47843	2.27221	1.14514	1.34814e-05	up	Biological Process: signal transduction (GO:0007165);;	--	uncharacterized protein LOC105337446 [Crassostrea gigas]
Crassostrea_gigas_newGene_13139	1.76308	3.50291	-1.16012	7.03766e-08	down	Molecular Function: protein serine/threonine kinase activity (GO:0004674);; Molecular Function: ATP binding (GO:0005524);;	K04456|5.0e-144|crg:105336892|K04456 RAC serine/threonine-protein kinase [EC:2.7.11.1] | (RefSeq) RAC-gamma serine/threonine-protein kinase-like	serine/threonine-protein kinase akt-2 [Crassostrea gigas]
Cg11858	4.1461	1.31993	1.32249	0.000909137	up	--	--	uncharacterized protein LOC105333609 isoform X1 [Crassostrea gigas]
Cg02561	37.2803	0	9.1694	6.36381e-178	up	Molecular Function: nucleotide binding (GO:0000166);; Biological Process: immune effector process (GO:0002252);; Biological Process: immune system process (GO:0002376);; Biological Process: regulation of immune system process (GO:0002682);; Molecular Function: molecular_function (GO:0003674);; Molecular Function: nucleic acid binding (GO:0003676);; Molecular Function: RNA binding (GO:0003723);; M…	K22544|6.4e-195|crg:105343592|K22544 deoxynucleoside triphosphate triphosphohydrolase SAMHD1 [EC:3.1.5.-] | (RefSeq) deoxynucleoside triphosphate triphosphohydrolase SAMHD1	deoxynucleoside triphosphate triphosphohydrolase SAMHD1 isoform X2 [Crassostrea gigas]
Crassostrea_gigas_newGene_4305	1.62832	0.126802	1.64588	0.00113866	up	--	K04984|3.5e-08|smm:Smp_125690|K04984 transient receptor potential cation channel subfamily A member 1 | (RefSeq) transient receptor potential cation channel subfamily A member, putative	uncharacterized protein LOC117682389 [Crassostrea gigas]
Crassostrea_gigas_newGene_3608	4.94244	1.68719	1.53357	5.37288e-06	up	Molecular Function: zinc ion binding (GO:0008270);;	K11997|5.5e-232|crg:105323897|K11997 tripartite motif-containing protein 2/3 | (RefSeq) uncharacterized protein LOC105323897	E3 ubiquitin-protein ligase TRIM9-like [Crassostrea gigas]
Cg03443	6.60995	2.07885	1.27306	0.00298246	up	Biological Process: cell adhesion (GO:0007155);; Molecular Function: actin filament binding (GO:0051015);;	K06271|2.4e-104|crg:105339940|K06271 talin | (RefSeq) talin-2-like	talin-1-like isoform X6 [Crassostrea virginica]
Cg07488	0.277691	3.00585	-1.41795	0.00611928	down	Molecular Function: RNA binding (GO:0003723);; Molecular Function: ribonuclease T2 activity (GO:0033897);;	K01166|1.8e-148|crg:105343473|K01166 ribonuclease T2 [EC:4.6.1.19] | (RefSeq) ribonuclease Oy-like isoform X1	ribonuclease Oy-like isoform X1 [Crassostrea gigas]
Cg22519	1.18935	5.77303	-1.91441	1.13572e-07	down	Molecular Function: motor activity (GO:0003774);; Molecular Function: actin binding (GO:0003779);; Molecular Function: ATP binding (GO:0005524);; Cellular Component: myosin complex (GO:0016459);;	K00698|0.0e+00|crg:105317562|K00698 chitin synthase [EC:2.4.1.16] | (RefSeq) uncharacterized protein LOC105317562 isoform X1	uncharacterized protein LOC105317562 isoform X2 [Crassostrea gigas]
Cg00492	0.0296795	0.742094	-3.00651	6.38626e-13	down	--	K19930|8.5e-13|lhu:105679516|K19930 SRC kinase signaling inhibitor 1 | (RefSeq) LOW QUALITY PROTEIN: uncharacterized protein LOC105679516	uncharacterized protein LOC105340002 [Crassostrea gigas]
Cg07530	2.47464	10.2683	-1.71861	2.6332e-06	down	Cellular Component: integral component of membrane (GO:0016021);;	--	uncharacterized protein LOC105329147 [Crassostrea gigas]
Cg16976	3.36333	0.865995	1.2892	0.00802699	up	--	--	uncharacterized protein LOC105334186 [Crassostrea gigas]
Crassostrea_gigas_newGene_12913	2.86079	0.629073	1.5165	0.00107931	up	Molecular Function: zinc ion binding (GO:0008270);;	K12035|1.9e-31|crg:105349208|K12035 tripartite motif-containing protein 71 [EC:2.3.2.27] | (RefSeq) uncharacterized protein LOC105349208	uncharacterized protein LOC117689317 isoform X1 [Crassostrea gigas]
Cg05299	11.1196	5.24959	1.00788	8.02659e-08	up	Molecular Function: protein tyrosine phosphatase activity (GO:0004725);; Molecular Function: protein tyrosine/serine/threonine phosphatase activity (GO:0008138);;	K17614|4.5e-104|crg:105343714|K17614 dual specificity phosphatase 3 [EC:3.1.3.16 3.1.3.48] | (RefSeq) dual specificity protein phosphatase 3	dual specificity protein phosphatase 3 [Crassostrea gigas]
Cg29869	1.79344	12.1285	-2.19677	1.15562e-08	down	--	K23284|7.1e-47|crg:105328872|K23284 C1q-related factor | (RefSeq) collagen alpha-2(VIII) chain	complement C1q tumor necrosis factor-related protein 2-like [Crassostrea virginica]
Crassostrea_gigas_newGene_2195	0.0602873	6.87655	-5.06134	3.46111e-46	down	--	K00753|3.8e-50|crg:109619337|K00753 glycoprotein 3-alpha-L-fucosyltransferase [EC:2.4.1.214] | (RefSeq) alpha-(1,3)-fucosyltransferase fut-5-like	alpha-(1,3)-fucosyltransferase fut-5-like [Crassostrea gigas]
Crassostrea_gigas_newGene_14750	1.71607	0.168398	1.96823	3.50753e-05	up	Molecular Function: calcium ion binding (GO:0005509);;	--	--
Cg11921	4.92458	1.78522	1.12725	0.00976929	up	Molecular Function: iron ion binding (GO:0005506);; Molecular Function: oxidoreductase activity (GO:0016491);; Molecular Function: 2 iron, 2 sulfur cluster binding (GO:0051537);; Molecular Function: FAD binding (GO:0071949);;	K00106|0.0e+00|crg:105320492|K00106 xanthine dehydrogenase/oxidase [EC:1.17.1.4 1.17.3.2] | (RefSeq) xanthine dehydrogenase/oxidase	xanthine dehydrogenase/oxidase [Crassostrea gigas]
Cg00384	0.203742	29.3327	-1.84606	0.000202157	down	--	K22244|1.9e-49|crg:105344906|K22244 regenerating islet-derived protein 4 | (RefSeq) perlucin-like	perlucin [Crassostrea gigas]
Cg16445	6.46072	19.0979	-1.32211	0.000337292	down	--	--	uncharacterized protein LOC117681659 [Crassostrea gigas]
Cg06549	0.00221233	0.254064	-2.69696	1.6235e-08	down	Molecular Function: nucleic acid binding (GO:0003676);; Molecular Function: aspartic-type endopeptidase activity (GO:0004190);; Biological Process: DNA integration (GO:0015074);;	K06065|4.4e-161|xma:102225078|K06065 nuclear receptor co-repressor 2 | (RefSeq) uncharacterized protein LOC102225078	uncharacterized protein LOC105343682 [Crassostrea gigas]
Cg06153	6.35585	1.5339	1.63554	2.29475e-05	up	Cellular Component: integral component of plasma membrane (GO:0005887);; Molecular Function: symporter activity (GO:0015293);;	K05048|3.9e-85|crg:105332859|K05048 solute carrier family 6 (neurotransmitter transporter, amino acid/orphan) member 15/16/17/18/20 | (RefSeq) sodium- and chloride-dependent transporter XTRP3A	LOW QUALITY PROTEIN: sodium- and chloride-dependent transporter XTRP3-like [Crassostrea virginica]
Cg06557	4.54863	0.943163	1.93648	1.26006e-09	up	Cellular Component: integral component of membrane (GO:0016021);;	K14616|4.1e-08|gfr:102038104|K14616 cubilin | (RefSeq) CUBN; cubilin	uncharacterized protein LOC105325461 isoform X3 [Crassostrea gigas]
Cg10805	7.29907	0.529715	2.21935	3.93672e-06	up	--	--	mucin-5AC [Crassostrea gigas]
Cg08235	1.22313	6.20204	-2.00291	6.38549e-09	down	Cellular Component: integral component of membrane (GO:0016021);;	--	mucin-3A isoform X2 [Crassostrea gigas]
Cg24876	0.0815483	0.62385	-1.49089	0.00362938	down	Cellular Component: integral component of membrane (GO:0016021);;	K16681|4.6e-07|acep:105624629|K16681 protein crumbs | (RefSeq) LOW QUALITY PROTEIN: protein crumbs	uncharacterized protein LOC105345058 [Crassostrea gigas]
Cg27654	1.44963	0.417398	1.45078	9.05447e-05	up	Molecular Function: ubiquitin-protein transferase activity (GO:0004842);; Molecular Function: metal ion binding (GO:0046872);;	K10645|5.4e-13|dpx:DAPPUDRAFT_261080|K10645 E3 ubiquitin-protein ligase mind-bomb [EC:2.3.2.27] | (RefSeq) hypothetical protein	uncharacterized protein LOC105344997 [Crassostrea gigas]
Cg19574	3.78104	22.1486	-1.85604	2.40916e-05	down	Cellular Component: integral component of membrane (GO:0016021);;	--	uncharacterized protein LOC105348059 [Crassostrea gigas]
Cg13148	2.46723	7.89418	-1.54532	1.65363e-08	down	Molecular Function: hydrolase activity (GO:0016787);;	K01444|5.2e-213|crg:105348462|K01444 N4-(beta-N-acetylglucosaminyl)-L-asparaginase [EC:3.5.1.26] | (RefSeq) N(4)-(Beta-N-acetylglucosaminyl)-L-asparaginase	N(4)-(Beta-N-acetylglucosaminyl)-L-asparaginase [Crassostrea gigas]
Crassostrea_gigas_newGene_6121	12.4134	5.17987	1.0748	0.00381017	up	--	K17388|3.0e-15|crg:105336327|K17388 Rho-associated protein kinase 2 [EC:2.7.11.1] | (RefSeq) uncharacterized protein LOC105336327	uncharacterized protein LOC105336324 [Crassostrea gigas]
Cg15954	2.78359	1.27736	1.03691	8.99879e-07	up	--	--	uncharacterized protein LOC105332763 [Crassostrea gigas]
Cg00928	0.270632	1.15048	-1.41664	0.00281437	down	Molecular Function: G-protein coupled receptor activity (GO:0004930);; Biological Process: cell surface receptor signaling pathway (GO:0007166);; Cellular Component: integral component of membrane (GO:0016021);;	K13297|1.2e-23|crg:105344922|K13297 receptor-type tyrosine-protein phosphatase T [EC:3.1.3.48] | (RefSeq) receptor-type tyrosine-protein phosphatase T	uncharacterized protein LOC105326226 [Crassostrea gigas]
Crassostrea_gigas_newGene_12071	3.15521	12.5265	-1.73793	1.64057e-07	down	--	--	uncharacterized protein LOC105339439 isoform X1 [Crassostrea gigas]
Cg19115	1.06409	5.34351	-1.55947	0.000934068	down	Cellular Component: integral component of membrane (GO:0016021);;	--	uncharacterized protein LOC117683135 [Crassostrea gigas]
Cg01233	14.9031	5.49748	1.17734	0.00182586	up	Cellular Component: integral component of membrane (GO:0016021);;	K16060|1.4e-08|myi:110446781|K16060 baculoviral IAP repeat-containing protein 2/3 | (RefSeq) baculoviral IAP repeat-containing protein 2-like	E3 ubiquitin-protein ligase NEURL1B isoform X1 [Crassostrea gigas]
Cg16034	1.25511	3.93834	-1.55946	8.34447e-11	down	Molecular Function: transmembrane signaling receptor activity (GO:0004888);; Molecular Function: extracellular ligand-gated ion channel activity (GO:0005230);; Cellular Component: plasma membrane (GO:0005886);; Cellular Component: integral component of membrane (GO:0016021);;	K05194|4.6e-69|myi:110449554|K05194 glycine receptor alpha-2 | (RefSeq) glycine receptor subunit alpha-2-like	glycine receptor subunit alpha-3-like [Crassostrea gigas]
Crassostrea_gigas_newGene_13075	42.1534	119.271	-1.38321	1.25569e-06	down	Molecular Function: carbohydrate binding (GO:0030246);;	K20052|3.0e-14|nve:5508402|K20052 low-density lipoprotein receptor-related protein 8 | (RefSeq) low-density lipoprotein receptor 1	D-galactoside-specific lectin-like [Crassostrea gigas]
Cg21850	7.12103	2.92537	1.15222	7.00202e-05	up	Molecular Function: oxidoreductase activity (GO:0016491);; Molecular Function: metal ion binding (GO:0046872);;	K06759|0.0e+00|crg:105324927|K06759 contactin 1 | (RefSeq) contactin-like	contactin-like [Crassostrea gigas]
Cg21806	25.1453	10.1819	1.25512	9.63193e-31	up	Molecular Function: metal ion binding (GO:0046872);;	K09377|3.7e-77|lak:112041665|K09377 cysteine and glycine-rich protein | (RefSeq) cysteine and glycine-rich protein 1-like	muscle LIM protein Mlp84B isoform X2 [Crassostrea gigas]
Cg07338	3.56309	11.3899	-1.35013	0.000948044	down	Biological Process: reproduction (GO:0000003);; Biological Process: protein polyubiquitination (GO:0000209);; Biological Process: ameboidal-type cell migration (GO:0001667);; Biological Process: morphogenesis of an epithelium (GO:0002009);; Molecular Function: protease binding (GO:0002020);; Biological Process: epithelial cell development (GO:0002064);; Biological Process: columnar/cuboidal epith…	K16061|1.2e-43|lak:106168653|K16061 baculoviral IAP repeat-containing protein 7/8 | (RefSeq) baculoviral IAP repeat-containing protein 7-B-like	baculoviral IAP repeat-containing protein 7-like [Crassostrea gigas]
Cg16714	0	1.86321	-1.49288	0.00266147	down	Molecular Function: oxidoreductase activity (GO:0016491);; Molecular Function: metal ion binding (GO:0046872);;	--	uncharacterized protein LOC105348138 isoform X3 [Crassostrea gigas]
Cg20594	0.705574	2.45735	-1.27822	0.0068984	down	Cellular Component: integral component of membrane (GO:0016021);;	K22144|0.0e+00|crg:105339776|K22144 cell surface hyaluronidase [EC:3.2.1.35] | (RefSeq) cell migration-inducing and hyaluronan-binding protein	cell surface hyaluronidase [Crassostrea gigas]
Cg08573	0.367869	1.12699	-1.32124	0.000457497	down	Molecular Function: G-protein coupled receptor activity (GO:0004930);; Cellular Component: integral component of membrane (GO:0016021);;	--	beta-2 adrenergic receptor [Crassostrea gigas]
Crassostrea_gigas_newGene_2971	3.26379	0.874379	1.4446	0.00127681	up	Molecular Function: nucleic acid binding (GO:0003676);; Biological Process: DNA integration (GO:0015074);;	K06065|3.9e-125|xma:102225078|K06065 nuclear receptor co-repressor 2 | (RefSeq) uncharacterized protein LOC102225078	unnamed protein product [Mytilus coruscus]
Crassostrea_gigas_newGene_958	0.795294	2.02385	-1.27526	0.00934993	down	Cellular Component: integral component of membrane (GO:0016021);;	K16680|7.0e-09|crg:105338026|K16680 echinoid | (RefSeq) hemicentin-2 isoform X1	uncharacterized protein LOC105335170 isoform X1 [Crassostrea gigas]
Crassostrea_gigas_newGene_8287	4.74371	10.3277	-1.12661	6.2005e-18	down	Molecular Function: protein kinase activity (GO:0004672);; Molecular Function: ATP binding (GO:0005524);;	K08845|9.3e-17|xla:398892|K08845 A-Raf proto-oncogene serine/threonine-protein kinase [EC:2.7.11.1] | (RefSeq) araf.L, a-raf, araf, araf-a, araf-b, araf1, pks2, rafa1; A-Raf proto-oncogene, serine/threonine kinase L homeolog	serine/threonine-protein kinase dst1 [Crassostrea gigas]
Cg04140	2.89213	1.02145	1.30498	4.20482e-05	up	Molecular Function: kinase activity (GO:0016301);;	K00846|9.3e-166|crg:105331023|K00846 ketohexokinase [EC:2.7.1.3] | (RefSeq) ketohexokinase	ketohexokinase [Crassostrea gigas]
Crassostrea_gigas_newGene_11637	243.776	92.7712	1.28551	5.76494e-14	up	Molecular Function: carbonate dehydratase activity (GO:0004089);; Molecular Function: zinc ion binding (GO:0008270);;	K01672|1.9e-150|crg:105342593|K01672 carbonic anhydrase [EC:4.2.1.1] | (RefSeq) carbonic anhydrase 2 isoform X1	carbonic anhydrase 2 isoform X4 [Crassostrea gigas]
Cg12704	0.63204	2.42721	-1.33028	0.00531843	down	--	K10609|7.0e-14|amex:111188264|K10609 cullin 4 | (RefSeq) LOW QUALITY PROTEIN: cullin-4A-like	heat shock 70 kDa protein 12A [Crassostrea gigas]
Cg30015	1.92331	0.422233	1.79954	2.2124e-07	up	--	--	translation initiation factor IF-2-like isoform X4 [Crassostrea gigas]
Cg00805	0.148502	0.444333	-1.25636	0.00232808	down	Molecular Function: protein tyrosine phosphatase activity (GO:0004725);; Cellular Component: integral component of membrane (GO:0016021);;	K13297|1.1e-156|crg:105322070|K13297 receptor-type tyrosine-protein phosphatase T [EC:3.1.3.48] | (RefSeq) uncharacterized protein LOC105322070	receptor-type tyrosine-protein phosphatase alpha isoform X1 [Crassostrea gigas]
Cg07538	0.298201	16.1271	-1.65052	0.000999507	down	Molecular Function: creatine kinase activity (GO:0004111);; Molecular Function: ATP binding (GO:0005524);; Biological Process: phosphocreatine biosynthetic process (GO:0046314);;	K00934|0.0e+00|crg:105320161|K00934 arginine kinase [EC:2.7.3.3] | (RefSeq) taurocyamine kinase	LOW QUALITY PROTEIN: taurocyamine kinase-like [Crassostrea virginica]
Cg07283	0.093549	0.661093	-1.78054	0.000151357	down	--	K10104|3.0e-70|crg:105320234|K10104 ficolin | (RefSeq) fibrinogen beta chain-like	angiopoietin-4 [Crassostrea gigas]
Cg14084	8.95607	3.35466	1.17297	0.00152035	up	Biological Process: regulation of apoptotic process (GO:0042981);;	--	uncharacterized protein LOC105326615 isoform X1 [Crassostrea gigas]
Crassostrea_gigas_newGene_10695	4.36522	0.114684	2.69511	1.59047e-08	up	--	--	uncharacterized protein LOC105338750 isoform X3 [Crassostrea gigas]
Cg11711	11.0803	50.7626	-1.95388	2.68389e-10	down	--	K23284|1.5e-104|crg:105330564|K23284 C1q-related factor | (RefSeq) complement C1q tumor necrosis factor-related protein 3	complement C1q tumor necrosis factor-related protein 3 isoform X1 [Crassostrea gigas]
Cg28773	2.66182	5.89612	-1.04556	0.000947099	down	Molecular Function: ubiquitin-protein transferase activity (GO:0004842);; Molecular Function: metal ion binding (GO:0046872);;	K10645|1.2e-11|bacu:103004442|K10645 E3 ubiquitin-protein ligase mind-bomb [EC:2.3.2.27] | (RefSeq) MIB2; mindbomb E3 ubiquitin protein ligase 2	uncharacterized protein LOC105346154 [Crassostrea gigas]
Cg23256	0.0800567	1.9256	-2.12678	1.5111e-05	down	Cellular Component: integral component of membrane (GO:0016021);; Molecular Function: transmembrane transporter activity (GO:0022857);;	K14611|2.4e-133|sko:100374959|K14611 solute carrier family 23 (nucleobase transporter), member 1 | (RefSeq) solute carrier family 23 member 2-like	solute carrier family 23 member 2 [Crassostrea gigas]
Cg19223	44.2832	21.2743	1.0051	1.06889e-13	up	Molecular Function: lyase activity (GO:0016829);; Biological Process: transsulfuration (GO:0019346);; Molecular Function: pyridoxal phosphate binding (GO:0030170);;	K01758|6.6e-184|crg:105327873|K01758 cystathionine gamma-lyase [EC:4.4.1.1] | (RefSeq) cystathionine gamma-lyase isoform X1	cystathionine gamma-lyase [Crassostrea gigas]
Cg13815	0.0968423	1.72568	-3.15717	1.9914e-18	down	Molecular Function: G-protein coupled receptor activity (GO:0004930);; Cellular Component: integral component of membrane (GO:0016021);;	K04194|6.2e-57|myi:110450339|K04194 cholecystokinin A receptor | (RefSeq) gastrin/cholecystokinin type B receptor-like	LOW QUALITY PROTEIN: tyramine/octopamine receptor-like [Crassostrea virginica]
Cg04461	2.40528	0.917677	1.22187	2.69678e-05	up	Molecular Function: ATP transmembrane transporter activity (GO:0005347);; Molecular Function: methyltransferase activity (GO:0008168);; Cellular Component: integral component of membrane (GO:0016021);; Molecular Function: oxidoreductase activity (GO:0016491);;	K00272|1.8e-188|crg:105317035|K00272 D-aspartate oxidase [EC:1.4.3.1] | (RefSeq) D-aspartate oxidase-like	D-aspartate oxidase isoform X1 [Crassostrea gigas]
Crassostrea_gigas_newGene_1958	0.28561	1.96161	-2.24935	4.08935e-14	down	--	K08399|4.9e-29|gja:107114166|K08399 leucine-rich repeat-containing G protein-coupled receptor 6 | (RefSeq) LGR6; leucine rich repeat containing G protein-coupled receptor 6	uncharacterized protein LOC105333180 [Crassostrea gigas]
Cg00950	0.0365103	0.465222	-1.3426	0.00935771	down	--	--	uncharacterized protein LOC105322452 [Crassostrea gigas]
Cg12361	51.895	3.67703	1.33825	0.00785611	up	--	--	fucolectin [Crassostrea gigas]
Cg01616	2.25195	0.303099	1.76319	0.000300787	up	Cellular Component: integral component of membrane (GO:0016021);;	K10104|1.3e-161|crg:105327049|K10104 ficolin | (RefSeq) microfibril-associated glycoprotein 4	IgGFc-binding protein-like isoform X15 [Crassostrea gigas]
Cg29538	6.78147	108.086	-3.39633	8.16035e-25	down	Cellular Component: integral component of membrane (GO:0016021);;	--	uncharacterized protein LOC105348625 [Crassostrea gigas]
Crassostrea_gigas_newGene_15794	0.0024625	4.58935	-5.1816	2.93763e-36	down	--	--	uncharacterized protein LOC105346389 [Crassostrea gigas]
Cg00152	3.66105	8.48873	-1.19555	1.41203e-11	down	--	--	golgin subfamily A member 4 isoform X13 [Crassostrea gigas]
Crassostrea_gigas_newGene_2721	4.73062	1.28899	1.69007	1.8023e-10	up	Molecular Function: zinc ion binding (GO:0008270);;	K11997|8.4e-252|crg:105326056|K11997 tripartite motif-containing protein 2/3 | (RefSeq) tripartite motif-containing protein 55	tripartite motif-containing protein 72-like [Crassostrea gigas]
Cg12238	0.504431	1.45529	-1.28277	0.000810679	down	--	--	uncharacterized protein LOC105340817 isoform X2 [Crassostrea gigas]
Crassostrea_gigas_newGene_9437	1.02374	3.59553	-1.28893	0.00514118	down	--	--	ankyrin repeat domain-containing protein 29 isoform X2 [Crassostrea gigas]
Crassostrea_gigas_newGene_15254	0.231051	1.0663	-1.40849	0.00325043	down	Molecular Function: nucleic acid binding (GO:0003676);; Biological Process: DNA integration (GO:0015074);;	--	uncharacterized protein LOC105330486 [Crassostrea gigas]
Cg06124	0.260368	1.2969	-1.87918	4.44206e-07	down	Molecular Function: NAD+ ADP-ribosyltransferase activity (GO:0003950);;	K15259|9.5e-53|pcan:112558757|K15259 poly [ADP-ribose] polymerase 7/11/12/13 [EC:2.4.2.30] | (RefSeq) tankyrase-like isoform X1	protein mono-ADP-ribosyltransferase PARP15 [Crassostrea gigas]
Cg11714	4.14555	0.909038	1.43927	0.00311389	up	--	--	uncharacterized protein LOC105318900 [Crassostrea gigas]
Cg16022	0.123656	3.17514	-2.79107	6.39917e-10	down	Molecular Function: sulfotransferase activity (GO:0008146);; Cellular Component: integral component of membrane (GO:0016021);;	K09673|7.1e-134|crg:109619736|K09673 carbohydrate 4-sulfotransferase 9 [EC:2.8.2.-] | (RefSeq) uncharacterized protein LOC109619736	uncharacterized protein LOC109619736 [Crassostrea gigas]
Cg01121	0.748043	0.0347384	1.3437	0.00644964	up	Molecular Function: zinc ion binding (GO:0008270);; Molecular Function: hydrolase activity, acting on carbon-nitrogen (but not peptide) bonds, in cyclic amidines (GO:0016814);;	K18750|4.2e-30|crg:109620988|K18750 C->U-editing enzyme APOBEC3 [EC:3.5.4.-] | (RefSeq) uncharacterized protein LOC109620988	uncharacterized protein LOC117687165 [Crassostrea gigas]
Cg12607	65.5135	667.464	-3.34617	0	down	Molecular Function: galactosylceramide sulfotransferase activity (GO:0001733);; Cellular Component: Golgi apparatus (GO:0005794);; Biological Process: glycolipid biosynthetic process (GO:0009247);; Cellular Component: integral component of membrane (GO:0016021);;	--	proline rich transmembrane protein 1B [Crassostrea gigas]
Cg01034	3.54587	1.59826	1.05645	1.34054e-06	up	Molecular Function: RNA binding (GO:0003723);; Molecular Function: methyltransferase activity (GO:0008168);; Biological Process: methylation (GO:0032259);;	K21971|1.6e-261|crg:105337733|K21971 methyltransferase NSUN6 [EC:2.1.1.-] | (RefSeq) putative methyltransferase NSUN6	tRNA (cytosine(72)-C(5))-methyltransferase NSUN6 isoform X1 [Crassostrea gigas]
Crassostrea_gigas_newGene_516	2.35342	0.587396	1.65591	7.56365e-06	up	--	K02366|3.4e-66|amex:111197650|K02366 glucuronyl/N-acetylglucosaminyl transferase EXT1 [EC:2.4.1.224 2.4.1.225] | (RefSeq) uncharacterized protein LOC111197650 isoform X1	uncharacterized protein LOC105338989 isoform X2 [Crassostrea gigas]
Cg26900	1.25382	3.74619	-1.28586	0.00115212	down	Molecular Function: GTPase activity (GO:0003924);; Molecular Function: GTP binding (GO:0005525);;	K07874|5.7e-78|crg:105327489|K07874 Ras-related protein Rab-1A | (RefSeq) ras-related protein Rab-1A	ras-related protein Rab-1A-like [Crassostrea gigas]
Cg03048	23.4345	4.17194	1.80537	3.91105e-05	up	Molecular Function: ion channel activity (GO:0005216);; Cellular Component: integral component of membrane (GO:0016021);;	K04977|6.4e-210|crg:105330656|K04977 transient receptor potential cation channel subfamily M member 2 [EC:3.6.1.13] | (RefSeq) transient receptor potential cation channel subfamily M member 2-like	transient receptor potential cation channel subfamily M member-like 2 [Crassostrea gigas]
Crassostrea_gigas_newGene_7044	5.11534	1.39136	1.38296	0.00316882	up	Molecular Function: zinc ion binding (GO:0008270);;	K11997|2.8e-149|crg:105341406|K11997 tripartite motif-containing protein 2/3 | (RefSeq) E3 ubiquitin-protein ligase TRIM71	uncharacterized protein LOC105322250 [Crassostrea gigas]
Cg23618	0.619161	1.89264	-1.42918	5.23559e-06	down	--	--	uncharacterized protein LOC105332452 [Crassostrea gigas]
Cg08227	0.141506	1.07541	-1.76102	0.000268926	down	--	--	uncharacterized protein LOC105342612 isoform X1 [Crassostrea gigas]
Cg12379	6.41856	2.83907	1.04994	0.000133911	up	Cellular Component: Golgi membrane (GO:0000139);; Cellular Component: caveola (GO:0005901);; Cellular Component: integral component of membrane (GO:0016021);; Biological Process: caveola assembly (GO:0070836);;	K12959|1.5e-31|lak:106160813|K12959 caveolin 3 | (RefSeq) caveolin-3-like	caveolin-3 [Crassostrea gigas]
Cg22507	2.53379	8.14266	-1.62245	6.32803e-15	down	Molecular Function: motor activity (GO:0003774);; Molecular Function: actin binding (GO:0003779);; Molecular Function: chitin synthase activity (GO:0004100);; Molecular Function: ATP binding (GO:0005524);; Cellular Component: integral component of membrane (GO:0016021);; Cellular Component: myosin complex (GO:0016459);;	K00698|0.0e+00|crg:105317562|K00698 chitin synthase [EC:2.4.1.16] | (RefSeq) uncharacterized protein LOC105317562 isoform X1	uncharacterized protein LOC105317562 isoform X2 [Crassostrea gigas]
Cg11727	3.71102	17.446	-1.90775	2.30703e-08	down	--	K23284|9.6e-56|crg:105327022|K23284 C1q-related factor | (RefSeq) complement C1q tumor necrosis factor-related protein 3-like isoform X1	complement C1q-like protein 3 [Crassostrea gigas]
Cg07364	0.267822	9.78462	-3.11802	3.82506e-12	down	--	--	uncharacterized protein LOC105335290 [Crassostrea gigas]
Cg20012	0.00140717	1.62734	-3.86889	4.53339e-18	down	Biological Process: mitotic sister chromatid segregation (GO:0000070);; Molecular Function: DNA secondary structure binding (GO:0000217);; Cellular Component: nuclear chromosome (GO:0000228);; Biological Process: mitotic cell cycle (GO:0000278);; Biological Process: nuclear division (GO:0000280);; Cellular Component: condensed chromosome (GO:0000793);; Cellular Component: condensed nuclear chromo…	K24032|5.8e-48|sko:100368807|K24032 SH3 and PX domain-containing protein 2 | (RefSeq) uncharacterized LOC100368807	E3 SUMO-protein ligase KIAA1586-like isoform X1 [Crassostrea gigas]
Crassostrea_gigas_newGene_5369	1.99689	0.412573	1.43146	0.00378321	up	--	K06560|3.2e-10|xma:102227252|K06560 mannose receptor, C type | (RefSeq) macrophage mannose receptor 1-like	C-type mannose receptor 2-like [Crassostrea gigas]
Cg28284	3.4329	1.46999	1.13262	5.00726e-08	up	Cellular Component: integral component of membrane (GO:0016021);;	--	--
Cg21104	8.21243	2.96461	1.20904	0.00134683	up	Molecular Function: scavenger receptor activity (GO:0005044);; Cellular Component: integral component of membrane (GO:0016021);;	K13912|5.7e-244|vvp:112915301|K13912 deleted in malignant brain tumors 1 protein | (RefSeq) deleted in malignant brain tumors 1 protein-like	uncharacterized protein LOC105325278 [Crassostrea gigas]
Crassostrea_gigas_newGene_129	12.5497	1.90958	1.65001	0.000770546	up	Molecular Function: nucleic acid binding (GO:0003676);; Molecular Function: zinc ion binding (GO:0008270);;	--	uncharacterized protein LOC117692387 isoform X1 [Crassostrea gigas]
Cg12116	7.82415	0	6.61539	2.29486e-67	up	Molecular Function: magnesium ion binding (GO:0000287);; Molecular Function: dUTP diphosphatase activity (GO:0004170);; Biological Process: dUMP biosynthetic process (GO:0006226);; Biological Process: dUTP catabolic process (GO:0046081);;	K01520|1.0e-79|crg:105326119|K01520 dUTP pyrophosphatase [EC:3.6.1.23] | (RefSeq) deoxyuridine 5'-triphosphate nucleotidohydrolase	deoxyuridine 5'-triphosphate nucleotidohydrolase-like [Crassostrea gigas]
Cg07153	2.68682	0.860224	1.41043	8.4057e-06	up	Molecular Function: monooxygenase activity (GO:0004497);; Molecular Function: iron ion binding (GO:0005506);; Molecular Function: oxidoreductase activity, acting on paired donors, with incorporation or reduction of molecular oxygen (GO:0016705);; Molecular Function: heme binding (GO:0020037);;	K07408|2.0e-131|crg:105338164|K07408 cytochrome P450 family 1 subfamily A polypeptide 1 [EC:1.14.14.1] | (RefSeq) cytochrome P450 1A1	steroid 17-alpha-hydroxylase/17,20 lyase isoform X2 [Crassostrea gigas]
Cg09972	3.42202	0.0836478	3.37224	2.89827e-14	up	--	--	uncharacterized protein LOC117690720 [Crassostrea gigas]
Crassostrea_gigas_newGene_6745	3.29687	1.18322	1.41907	4.94862e-23	up	Molecular Function: ubiquitin-protein transferase activity (GO:0004842);; Molecular Function: zinc ion binding (GO:0008270);; Cellular Component: integral component of membrane (GO:0016021);;	K11975|8.6e-84|crg:105336300|K11975 E3 ubiquitin-protein ligase RNF144 [EC:2.3.2.31] | (RefSeq) probable E3 ubiquitin-protein ligase RNF144A	probable E3 ubiquitin-protein ligase RNF144A [Crassostrea gigas]
Crassostrea_gigas_newGene_13462	7.94673	0.64769	2.31807	5.03372e-07	up	Molecular Function: zinc ion binding (GO:0008270);;	K19410|1.0e-09|dpa:109543998|K19410 inner nuclear membrane protein Man1 | (RefSeq) uncharacterized protein LOC109543998 isoform X1	uncharacterized protein LOC105323530 isoform X1 [Crassostrea gigas]
Cg00990	19.1464	110.212	-2.30557	6.45255e-17	down	Molecular Function: serine-type endopeptidase inhibitor activity (GO:0004867);;	K23087|1.9e-83|crg:105334684|K23087 tissue factor pathway inhibitor 2 | (RefSeq) kunitz-type serine protease inhibitor textilinin-3	kunitz-type serine protease inhibitor 4 isoform X2 [Crassostrea gigas]
Crassostrea_gigas_newGene_13183	3.61367	26.3474	-2.28044	2.06992e-09	down	--	--	uncharacterized protein LOC117688898 [Crassostrea gigas]
Cg09692	0.101106	3.03567	-3.4024	1.85259e-16	down	Molecular Function: catalytic activity (GO:0003824);; Molecular Function: transmembrane signaling receptor activity (GO:0004888);; Molecular Function: extracellular ligand-gated ion channel activity (GO:0005230);; Cellular Component: plasma membrane (GO:0005886);; Cellular Component: integral component of membrane (GO:0016021);;	K20247|3.4e-125|crg:105323235|K20247 hercynylcysteine S-oxide lyase [EC:4.4.1.36] | (RefSeq) hercynylcysteine sulfoxide lyase	hercynylcysteine sulfoxide lyase-like [Crassostrea gigas]
Crassostrea_gigas_newGene_10217	2.15	0.627069	1.44691	0.000150872	up	--	K07665|3.4e-30|api:107884559|K07665 two-component system, OmpR family, copper resistance phosphate regulon response regulator CusR | (RefSeq) uncharacterized protein LOC107884559	uncharacterized protein LOC105340995 isoform X3 [Crassostrea gigas]
Cg03232	0.225326	443.376	-1.26856	0.00993867	down	Molecular Function: DNA binding (GO:0003677);;	K21870|4.3e-10|dvi:6627790|K21870 barrier-to-autointegration factor | (RefSeq) barrier-to-autointegration factor	baf [Drosophila busckii]
Cg00106	0	1.93666	-2.62853	5.00726e-08	down	--	K10104|7.0e-184|crg:105336429|K10104 ficolin | (RefSeq) ficolin-2	ficolin-2-like isoform X1 [Crassostrea gigas]
Cg15305	303.105	25.6484	1.86532	0.000190805	up	--	--	uncharacterized protein LOC105318572 [Crassostrea gigas]
Cg11922	0.738678	2.84323	-1.42268	0.00172827	down	Molecular Function: RNA binding (GO:0003723);; Molecular Function: hydrolase activity, hydrolyzing O-glycosyl compounds (GO:0004553);; Biological Process: carbohydrate metabolic process (GO:0005975);; Molecular Function: oxidoreductase activity (GO:0016491);; Molecular Function: metal ion binding (GO:0046872);; Molecular Function: FAD binding (GO:0071949);;	K00106|0.0e+00|crg:105320513|K00106 xanthine dehydrogenase/oxidase [EC:1.17.1.4 1.17.3.2] | (RefSeq) xanthine dehydrogenase/oxidase-like	xanthine dehydrogenase/oxidase-like [Crassostrea gigas]
Cg09884	2.15272	0.101846	2.32994	1.57421e-06	up	--	K02187|2.1e-43|crg:105349202|K02187 caspase 3 [EC:3.4.22.56] | (RefSeq) caspase-2-like	uncharacterized protein LOC105318237 isoform X2 [Crassostrea gigas]
Crassostrea_gigas_newGene_9224	3.91133	0.264401	2.71097	6.49165e-11	up	--	--	uncharacterized protein LOC105344958 [Crassostrea gigas]
Cg00289	10.0637	23.3224	-1.17367	1.75674e-07	down	Molecular Function: calcium ion binding (GO:0005509);;	K02183|3.5e-80|crg:105325248|K02183 calmodulin | (RefSeq) calmodulin-like protein 4	calmodulin-like protein 4 [Crassostrea gigas]
Crassostrea_gigas_newGene_9490	5.24772	11.2124	-1.03495	8.5809e-08	down	Molecular Function: monooxygenase activity (GO:0004497);; Molecular Function: iron ion binding (GO:0005506);; Molecular Function: oxidoreductase activity, acting on paired donors, with incorporation or reduction of molecular oxygen (GO:0016705);; Molecular Function: heme binding (GO:0020037);;	K17960|5.0e-81|lak:106155743|K17960 cytochrome P450 family 49 subfamily A | (RefSeq) cytochrome P450 10-like	cytochrome P450 27C1 [Crassostrea gigas]
Cg29335	29.8584	6.87824	1.33548	0.00735202	up	Molecular Function: calcium ion binding (GO:0005509);;	--	sarcoplasmic calcium-binding protein-like [Crassostrea gigas]
Cg21544	0.47564	1.67377	-1.61171	5.5795e-07	down	Molecular Function: calcium ion binding (GO:0005509);;	K06560|5.9e-22|crg:105324874|K06560 mannose receptor, C type | (RefSeq) macrophage mannose receptor 1 isoform X1	fibropellin-1-like isoform X3 [Crassostrea gigas]
Cg14816	1.28238	4.7012	-1.50445	0.000181477	down	--	K06910|6.0e-15|tsp:Tsp_03572|K06910 phosphatidylethanolamine-binding protein | (RefSeq) OV-16 antigen	phosphatidylethanolamine-binding protein 4 [Crassostrea gigas]
Cg19564	0.002627	5.70679	-1.76253	0.000377577	down	Molecular Function: protein kinase activity (GO:0004672);; Molecular Function: ATP binding (GO:0005524);;	K05088|9.9e-13|oas:101103481|K05088 proto-oncogene tyrosine-protein kinase ROS [EC:2.7.10.1] | (RefSeq) ROS1; LOW QUALITY PROTEIN: proto-oncogene tyrosine-protein kinase ROS	uncharacterized protein LOC105324997 isoform X1 [Crassostrea gigas]
Cg00713	3.35675	0.361424	2.38085	6.46572e-09	up	Molecular Function: calcium ion binding (GO:0005509);;	K05695|1.8e-12|nve:5520102|K05695 receptor-type tyrosine-protein phosphatase F [EC:3.1.3.48] | (RefSeq) receptor-type tyrosine-protein phosphatase mu isoform X1	EGF-like repeat and discoidin I-like domain-containing protein 3 [Crassostrea gigas]
Cg22732	116.127	5.39828	2.80229	8.8096e-10	up	Cellular Component: integral component of membrane (GO:0016021);;	--	proline-rich transmembrane protein 1-like [Crassostrea gigas]
Cg15137	2.29352	0.969631	1.14021	1.20135e-06	up	--	K10609|2.9e-21|amex:111188264|K10609 cullin 4 | (RefSeq) LOW QUALITY PROTEIN: cullin-4A-like	heat shock 70 kDa protein 12A [Crassostrea gigas]
Cg22515	0.204755	18.6504	-3.98508	1.19584e-20	down	Molecular Function: calcium ion binding (GO:0005509);;	K17341|2.6e-17|myi:110449963|K17341 hemicentin | (RefSeq) hemicentin-1-like	titin isoform X3 [Crassostrea gigas]
Cg03579	1.16947	0.438927	1.13622	0.00362905	up	Cellular Component: integral component of membrane (GO:0016021);;	K06760|5.1e-11|crg:105326176|K06760 contactin 2 | (RefSeq) uncharacterized protein LOC105326176	uncharacterized protein LOC105334440 [Crassostrea gigas]
Cg15086	2.01821	0.204843	2.66663	5.01446e-14	up	Cellular Component: integral component of membrane (GO:0016021);; Molecular Function: transmembrane transporter activity (GO:0022857);;	K14611|0.0e+00|crg:105317952|K14611 solute carrier family 23 (nucleobase transporter), member 1 | (RefSeq) solute carrier family 23 member 1	solute carrier family 23 member 1 [Crassostrea gigas]
Cg03793	1.91754	0.860516	1.01067	0.000662457	up	Molecular Function: guanylate cyclase activity (GO:0004383);; Molecular Function: protein kinase activity (GO:0004672);; Molecular Function: ATP binding (GO:0005524);; Cellular Component: integral component of membrane (GO:0016021);; Biological Process: intracellular signal transduction (GO:0035556);;	K22600|1.2e-165|sko:100367264|K22600 guanylate cyclase 2G [EC:4.6.1.2] | (RefSeq) atrial natriuretic peptide receptor 1-like	atrial natriuretic peptide receptor 1 [Crassostrea gigas]
Cg08714	5.71005	0	6.81186	6.90635e-82	up	Molecular Function: calcium ion binding (GO:0005509);; Biological Process: integrin-mediated signaling pathway (GO:0007229);;	K10405|1.8e-12|crg:105324041|K10405 kinesin family member C1 | (RefSeq) kinesin-like protein KIN-14M isoform X3	uncharacterized protein LOC117690779 isoform X2 [Crassostrea gigas]
Crassostrea_gigas_newGene_15645	3.33364	1.33569	1.35458	0.00229688	up	Cellular Component: integral component of membrane (GO:0016021);;	--	uncharacterized protein LOC105322456 [Crassostrea gigas]
Cg19202	5.04198	13.5616	-1.30816	5.16562e-06	down	--	--	uncharacterized protein C7orf50 homolog [Crassostrea gigas]
Cg05739	1.9808	7.54308	-1.65498	1.75785e-06	down	Molecular Function: structural molecule activity (GO:0005198);; Cellular Component: dystrophin-associated glycoprotein complex (GO:0016010);; Biological Process: synapse organization (GO:0050808);;	K02608|1.5e-134|crg:105327159|K02608 origin recognition complex subunit 6 | (RefSeq) origin recognition complex subunit 6-like	origin recognition complex subunit 6-like [Crassostrea gigas]
Crassostrea_gigas_newGene_12368	1.25956	0.0790281	2.22317	3.77575e-06	up	Molecular Function: G-protein coupled receptor activity (GO:0004930);; Cellular Component: integral component of membrane (GO:0016021);;	--	--
Cg28086	1.19026	0.309304	1.40737	0.00155102	up	--	--	achacin [Crassostrea gigas]
Cg23349	3.33634	0.429201	2.23215	1.98458e-08	up	Molecular Function: protein binding (GO:0005515);; Molecular Function: methyltransferase activity (GO:0008168);; Biological Process: methylation (GO:0032259);;	K08852|7.4e-26|aplc:110986593|K08852 serine/threonine-protein kinase/endoribonuclease IRE1 [EC:2.7.11.1 3.1.26.-] | (RefSeq) uncharacterized protein LOC110986593 isoform X1	N-lysine methyltransferase KMT5A-like isoform X3 [Crassostrea gigas]
Cg11822	0	6.05819	-5.1922	3.35719e-40	down	Molecular Function: GTP binding (GO:0005525);; Cellular Component: membrane (GO:0016020);;	--	interferon-induced protein 44-like isoform X1 [Crassostrea gigas]
Cg09824	0.0131662	1.40879	-4.12607	1.30718e-23	down	Molecular Function: hydrolase activity, acting on carbon-nitrogen (but not peptide) bonds (GO:0016810);;	--	protein LONG AFTER FAR-RED 3 [Crassostrea gigas]
Crassostrea_gigas_newGene_13172	3.96101	0.8274	1.57535	5.26396e-05	up	--	--	uncharacterized protein LOC105348848 isoform X1 [Crassostrea gigas]
Cg07349	0.0182408	1.61382	-3.81417	5.67094e-19	down	--	K06776|3.6e-78|crg:105346217|K06776 receptor-type tyrosine-protein phosphatase kappa [EC:3.1.3.48] | (RefSeq) receptor-type tyrosine-protein phosphatase epsilon	multiple epidermal growth factor-like domains protein 10 isoform X2 [Crassostrea gigas]
Cg16753	1.66259	4.11945	-1.15758	0.00107931	down	Molecular Function: phospholipid transporter activity (GO:0005548);;	--	uncharacterized protein LOC105324676 isoform X2 [Crassostrea gigas]
Crassostrea_gigas_newGene_14014	0.156445	1.30056	-2.39263	1.20885e-10	down	--	--	uncharacterized protein LOC117680990 [Crassostrea gigas]
Cg04606	0.780177	6.21342	-2.42089	5.5069e-11	down	Molecular Function: DNA binding (GO:0003677);; Cellular Component: nucleus (GO:0005634);; Biological Process: regulation of transcription, DNA-templated (GO:0006355);; Molecular Function: protein dimerization activity (GO:0046983);;	K06054|1.3e-166|crg:105339144|K06054 hairy and enhancer of split 1 | (RefSeq) enhancer of split m7 protein-like	transcription factor HES-2-like [Crassostrea gigas]
Crassostrea_gigas_newGene_1201	4.24567	0.171636	3.82412	3.69634e-30	up	Molecular Function: zinc ion binding (GO:0008270);;	K11997|9.8e-237|crg:109617221|K11997 tripartite motif-containing protein 2/3 | (RefSeq) uncharacterized protein LOC109617221	E3 ubiquitin-protein ligase TRIM71-like [Crassostrea gigas]
Cg08695	0.179334	6.1449	-2.19627	7.76281e-06	down	Molecular Function: ubiquitin-protein transferase activity (GO:0004842);; Molecular Function: ATPase activity (GO:0016887);;	K22754|0.0e+00|crg:105325920|K22754 E3 ubiquitin-protein ligase RNF213 [EC:2.3.2.27] | (RefSeq) E3 ubiquitin-protein ligase rnf213-alpha isoform X1	E3 ubiquitin-protein ligase RNF213 [Crassostrea gigas]
Cg16334	8.94247	0.148229	1.32165	0.00543596	up	Molecular Function: DNA binding (GO:0003677);; Molecular Function: carbohydrate binding (GO:0030246);;	K06238|0.0e+00|crg:105331269|K06238 collagen type VI alpha | (RefSeq) collagen alpha-6(VI) chain	collagen alpha-3(VI) chain isoform X1 [Crassostrea gigas]
Cg22141	3.65351	8.89733	-1.24919	4.46892e-10	down	Molecular Function: G-protein coupled receptor activity (GO:0004930);; Cellular Component: integral component of membrane (GO:0016021);;	K04194|7.8e-223|crg:105327784|K04194 cholecystokinin A receptor | (RefSeq) cholecystokinin receptor type A	cholecystokinin receptor type A [Crassostrea gigas]
Cg21879	3.27481	1.34049	1.05558	0.00631836	up	Cellular Component: integral component of membrane (GO:0016021);;	K06550|6.5e-179|crg:105322288|K06550 L1 cell adhesion molecule | (RefSeq) neural cell adhesion molecule L1-like isoform X1	contactin-1 isoform X2 [Crassostrea gigas]
Cg23707	0.406955	1.19196	-1.4389	3.8916e-08	down	Molecular Function: RNA binding (GO:0003723);;	K10874|1.6e-164|crg:105325923|K10874 RAD52 motif-containing protein 1 | (RefSeq) RAD52 motif-containing protein 1	uncharacterized protein LOC111100369 [Crassostrea virginica]
Cg30262	1.5522	3.78097	-1.13976	0.000851327	down	Molecular Function: zinc ion binding (GO:0008270);; Molecular Function: transferase activity (GO:0016740);;	K11997|1.1e-127|crg:105323897|K11997 tripartite motif-containing protein 2/3 | (RefSeq) uncharacterized protein LOC105323897	uncharacterized protein LOC105323897 isoform X1 [Crassostrea gigas]
Cg11850	2.30854	0.487033	1.93456	1.34068e-09	up	--	K22754|4.8e-14|spis:111338202|K22754 E3 ubiquitin-protein ligase RNF213 [EC:2.3.2.27] | (RefSeq) E3 ubiquitin-protein ligase RNF213-like	uncharacterized protein LOC105324268 [Crassostrea gigas]
Crassostrea_gigas_newGene_3974	2.32864	5.61671	-1.1707	6.07419e-05	down	--	--	uncharacterized protein LOC117691134 isoform X1 [Crassostrea gigas]
Cg08369	5.90173	0.236681	3.61861	2.21204e-22	up	Molecular Function: ubiquitin-protein transferase activity (GO:0004842);; Molecular Function: ATPase activity (GO:0016887);;	K22754|0.0e+00|crg:105324838|K22754 E3 ubiquitin-protein ligase RNF213 [EC:2.3.2.27] | (RefSeq) E3 ubiquitin-protein ligase rnf213-alpha isoform X1	E3 ubiquitin-protein ligase rnf213-alpha [Crassostrea gigas]
Cg25714	0.137469	6.80013	-2.66579	1.98319e-08	down	--	K16726|7.1e-08|crg:105326597|K16726 ankyrin repeat domain-containing protein 17 | (RefSeq) serine/threonine-protein phosphatase 6 regulatory ankyrin repeat subunit B	uncharacterized protein LOC117690491 [Crassostrea gigas]
Crassostrea_gigas_newGene_12882	0.350285	6.29323	-3.06104	4.64165e-15	down	--	K02432|4.1e-08|crg:105324307|K02432 frizzled 1/7 | (RefSeq) frizzled-7-A	frizzled-7-A [Crassostrea gigas]
Crassostrea_gigas_newGene_13732	0.710419	1.80477	-1.18779	0.00082693	down	Molecular Function: protein binding (GO:0005515);;	--	ankyrin repeat domain-containing protein 50-like [Crassostrea gigas]
Crassostrea_gigas_newGene_1178	5.48411	0.916906	2.0028	4.10072e-07	up	Molecular Function: zinc ion binding (GO:0008270);;	K11997|5.8e-261|crg:105332950|K11997 tripartite motif-containing protein 2/3 | (RefSeq) tripartite motif-containing protein 55-like isoform X2	uncharacterized protein LOC105339745 isoform X2 [Crassostrea gigas]
Cg13002	13.0025	0.0172765	3.84281	1.29824e-16	up	Biological Process: regionalization (GO:0003002);; Biological Process: transport (GO:0006810);; Biological Process: multicellular organism development (GO:0007275);; Biological Process: pattern specification process (GO:0007389);; Biological Process: biological_process (GO:0008150);; Biological Process: anatomical structure morphogenesis (GO:0009653);; Biological Process: multidimensional cell gr…	K21440|1.3e-26|crg:105337856|K21440 ankyrin repeat domain-containing protein 50 | (RefSeq) uncharacterized protein LOC105337856	uncharacterized protein LOC117682342 isoform X1 [Crassostrea gigas]
Crassostrea_gigas_newGene_7754	0.121193	0.718139	-1.53888	0.00215713	down	Molecular Function: GTP binding (GO:0005525);;	K09228|1.6e-17|mgp:104914585|K09228 KRAB domain-containing zinc finger protein | (RefSeq) uncharacterized protein LOC104914585	uncharacterized protein LOC105339767 isoform X1 [Crassostrea gigas]
Cg10920	1.29112	3.21936	-1.1899	9.17698e-05	down	Molecular Function: nucleic acid binding (GO:0003676);; Molecular Function: DNA binding (GO:0003677);; Molecular Function: transposase activity (GO:0004803);; Biological Process: transposition, DNA-mediated (GO:0006313);;	--	PREDICTED: uncharacterized protein LOC106819095 isoform X2 [Priapulus caudatus]
Cg08805	0.822406	2.86097	-1.34756	0.00240272	down	Molecular Function: protein tyrosine phosphatase activity (GO:0004725);; Cellular Component: integral component of membrane (GO:0016021);;	K05693|1.0e-76|myi:110459130|K05693 receptor-type tyrosine-protein phosphatase mu [EC:3.1.3.48] | (RefSeq) receptor-type tyrosine-protein phosphatase mu-like isoform X1	receptor-type tyrosine-protein phosphatase epsilon-like [Crassostrea gigas]
Cg18717	0.620857	2.23228	-1.26854	0.00795239	down	--	--	uncharacterized protein LOC117682706 [Crassostrea gigas]
Crassostrea_gigas_newGene_3052	0.50511	1.83743	-1.68947	7.10066e-10	down	Molecular Function: zinc ion binding (GO:0008270);;	K11997|0.0e+00|crg:105317711|K11997 tripartite motif-containing protein 2/3 | (RefSeq) uncharacterized protein LOC105317711	uncharacterized protein LOC105317711 [Crassostrea gigas]
Cg00376	0.156512	0.672408	-1.40232	0.00364086	down	Molecular Function: non-membrane spanning protein tyrosine kinase activity (GO:0004715);; Molecular Function: ATP binding (GO:0005524);;	K08889|2.9e-151|crg:105338239|K08889 tyrosine-protein kinase Fer [EC:2.7.10.2] | (RefSeq) tyrosine-protein kinase Fer	tyrosine-protein kinase Fer [Crassostrea gigas]
Cg22276	10.9482	49.0744	-1.47655	0.00180813	down	Molecular Function: sulfotransferase activity (GO:0008146);;	K01025|1.6e-49|crg:105343439|K01025 sulfotransferase [EC:2.8.2.-] | (RefSeq) sulfotransferase family cytosolic 1B member 1	sulfotransferase 1A1 [Crassostrea gigas]
Crassostrea_gigas_newGene_1804	5.97222	1.763	1.67823	1.41936e-25	up	Molecular Function: zinc ion binding (GO:0008270);;	K11997|8.0e-115|crg:105326056|K11997 tripartite motif-containing protein 2/3 | (RefSeq) tripartite motif-containing protein 55	uncharacterized protein LOC105322002 [Crassostrea gigas]
Cg27179	0.374438	2.23402	-1.61877	0.000712789	down	--	--	uncharacterized protein LOC111129551 [Crassostrea virginica]
Cg22369	0.755126	0.0723641	2.57231	1.05361e-10	up	Molecular Function: calcium ion binding (GO:0005509);; Cellular Component: integral component of membrane (GO:0016021);;	K06825|4.9e-116|pcan:112554507|K06825 fibrillin 1 | (RefSeq) uncharacterized protein LOC112554507 isoform X1	LOW QUALITY PROTEIN: uncharacterized protein LOC105338347 [Crassostrea gigas]
Cg26962	0.182015	0.557818	-1.48432	4.1563e-08	down	Molecular Function: ammonium transmembrane transporter activity (GO:0008519);; Cellular Component: integral component of membrane (GO:0016021);;	K03320|9.7e-303|crg:105322435|K03320 ammonium transporter, Amt family | (RefSeq) putative ammonium transporter 3	putative ammonium transporter 3 isoform X2 [Crassostrea gigas]
Cg07581	0.026213	0.45192	-2.20729	4.1766e-06	down	Molecular Function: methyltransferase activity (GO:0008168);; Biological Process: methylation (GO:0032259);;	K20796|5.7e-151|crg:105330008|K20796 [histone H3]-lysine4 N-trimethyltransferase PRDM7/9 [EC:2.1.1.354] | (RefSeq) zinc finger protein OZF-like	zinc finger protein 665 [Crassostrea gigas]
Cg00204	6.28706	22.7871	-1.69603	2.50696e-09	down	Molecular Function: protein tyrosine phosphatase activity (GO:0004725);;	K13297|1.5e-183|crg:105334126|K13297 receptor-type tyrosine-protein phosphatase T [EC:3.1.3.48] | (RefSeq) receptor-type tyrosine-protein phosphatase epsilon-like	uncharacterized protein LOC105334720 isoform X8 [Crassostrea gigas]
Cg09256	1.64642	5.71097	-1.33386	0.00307362	down	--	--	uncharacterized protein LOC105348032 isoform X1 [Crassostrea gigas]
Crassostrea_gigas_newGene_11632	2.18705	6.00833	-1.39389	7.66896e-05	down	Molecular Function: oxidoreductase activity (GO:0016491);;	K00069|1.1e-115|crg:105336456|K00069 15-hydroxyprostaglandin dehydrogenase (NAD) [EC:1.1.1.141] | (RefSeq) 15-hydroxyprostaglandin dehydrogenase [NAD(+)] isoform X1	15-hydroxyprostaglandin dehydrogenase [NAD(+)]-like [Crassostrea gigas]
Cg22269	3.87401	1.29518	1.26585	0.00132291	up	Molecular Function: GTP binding (GO:0005525);; Molecular Function: metal ion binding (GO:0046872);;	K09228|2.9e-24|mgp:104914585|K09228 KRAB domain-containing zinc finger protein | (RefSeq) uncharacterized protein LOC104914585	GTPase IMAP family member 4-like [Crassostrea gigas]
Cg24046	10.0499	4.10753	1.2087	7.26972e-10	up	Molecular Function: thiol-dependent ubiquitin-specific protease activity (GO:0004843);;	K11835|1.1e-43|sko:100377510|K11835 ubiquitin carboxyl-terminal hydrolase 4/11 [EC:3.4.19.12] | (RefSeq) interaptin-like	uncharacterized protein LOC105324580 [Crassostrea gigas]
Cg27974	1.30193	0.0181112	2.83029	3.15726e-09	up	--	--	UPF0692 protein C19orf54 homolog [Crassostrea gigas]
Cg11729	24.2018	0	6.56243	7.86584e-64	up	--	K23284|2.6e-89|crg:105327022|K23284 C1q-related factor | (RefSeq) complement C1q tumor necrosis factor-related protein 3-like isoform X1	complement C1q tumor necrosis factor-related protein 3-like [Crassostrea gigas]
Crassostrea_gigas_newGene_873	1.81206	0.291653	2.04679	1.61082e-07	up	--	--	uncharacterized protein LOC117691338 [Crassostrea gigas]
Crassostrea_gigas_newGene_4941	0.117526	10.6054	-4.39154	1.06499e-27	down	--	K07665|1.8e-12|api:107884559|K07665 two-component system, OmpR family, copper resistance phosphate regulon response regulator CusR | (RefSeq) uncharacterized protein LOC107884559	uncharacterized protein LOC105346331 [Crassostrea gigas]
Crassostrea_gigas_newGene_16346	3.81033	0.282649	2.953	3.4953e-15	up	--	K09228|3.7e-07|pcan:112567522|K09228 KRAB domain-containing zinc finger protein | (RefSeq) zinc finger protein 37-like	uncharacterized protein LOC117688811 [Crassostrea gigas]
Cg18866	5.40777	1.11459	1.74684	1.41143e-05	up	--	--	uncharacterized protein LOC105339100 [Crassostrea gigas]
Cg14483	2.31427	0.984453	1.0575	0.00145121	up	Cellular Component: integral component of membrane (GO:0016021);;	K10609|2.6e-29|amex:111188264|K10609 cullin 4 | (RefSeq) LOW QUALITY PROTEIN: cullin-4A-like	heat shock 70 kDa protein 12A-like [Crassostrea virginica]
Cg30112	8.11344	55.1126	-2.52697	4.75376e-21	down	--	--	uncharacterized protein LOC117683789 isoform X1 [Crassostrea gigas]
Cg17821	3.60669	1.27668	1.25291	0.00030524	up	--	--	unnamed protein product [Mytilus coruscus]
Cg14040	2.91416	1.00704	1.36391	4.65684e-07	up	--	--	uncharacterized protein LOC105343417 [Crassostrea gigas]
Crassostrea_gigas_newGene_3640	6.52236	0.776842	2.1368	2.35095e-06	up	Molecular Function: zinc ion binding (GO:0008270);;	K11997|3.3e-91|crg:105323897|K11997 tripartite motif-containing protein 2/3 | (RefSeq) uncharacterized protein LOC105323897	uncharacterized protein LOC117682672 [Crassostrea gigas]
Crassostrea_gigas_newGene_11034	3.30887	0	6.15938	4.86107e-57	up	Molecular Function: zinc ion binding (GO:0008270);;	K12035|2.5e-227|crg:105317084|K12035 tripartite motif-containing protein 71 [EC:2.3.2.27] | (RefSeq) uncharacterized protein LOC105317084	uncharacterized protein LOC105341518 [Crassostrea gigas]
Cg17819	10.7574	0.901543	1.95723	7.64763e-05	up	Biological Process: carbohydrate metabolic process (GO:0005975);; Biological Process: protein glycosylation (GO:0006486);; Molecular Function: galactoside 2-alpha-L-fucosyltransferase activity (GO:0008107);; Cellular Component: Golgi cisterna membrane (GO:0032580);;	K00718|4.4e-195|crg:105332210|K00718 galactoside 2-L-fucosyltransferase 1/2 [EC:2.4.1.69] | (RefSeq) galactoside 2-alpha-L-fucosyltransferase 2	galactoside 2-alpha-L-fucosyltransferase 2 [Crassostrea gigas]
Cg12111	3.50916	1.34575	1.193	0.000251413	up	Molecular Function: magnesium ion binding (GO:0000287);; Molecular Function: dUTP diphosphatase activity (GO:0004170);; Molecular Function: GTP binding (GO:0005525);; Biological Process: dUMP biosynthetic process (GO:0006226);; Biological Process: dUTP catabolic process (GO:0046081);;	K09228|8.2e-18|mgp:104914585|K09228 KRAB domain-containing zinc finger protein | (RefSeq) uncharacterized protein LOC104914585	uncharacterized protein LOC105343525 isoform X1 [Crassostrea gigas]
Cg05895	3.50644	1.38588	1.1912	2.7184e-05	up	Molecular Function: hydrolase activity, acting on carbon-nitrogen (but not peptide) bonds (GO:0016810);; Molecular Function: deacetylase activity (GO:0019213);;	K01465|4.4e-43|pxy:105396922|K01465 dihydroorotase [EC:3.5.2.3] | (RefSeq) uncharacterized LOC105396922	deacetylase Oant_2987 isoform X1 [Crassostrea gigas]
Crassostrea_gigas_newGene_11560	3.10995	0.603288	1.54776	0.00131481	up	--	K16726|1.0e-216|crg:105330604|K16726 ankyrin repeat domain-containing protein 17 | (RefSeq) uncharacterized protein LOC105330604	uncharacterized protein LOC117685382 [Crassostrea gigas]
Cg08793	2.7985	0.174809	2.67807	5.95497e-10	up	--	--	uncharacterized protein LOC111137873 [Crassostrea virginica]
Crassostrea_gigas_newGene_13717	13.8455	1.9755	1.8975	3.81398e-05	up	Molecular Function: zinc ion binding (GO:0008270);;	--	uncharacterized protein LOC105326470 isoform X2 [Crassostrea gigas]
Cg17768	1.4846	0.36456	1.84252	1.06476e-15	up	Molecular Function: zinc ion binding (GO:0008270);;	K12026|9.7e-260|crg:105334785|K12026 tripartite motif-containing protein 56 [EC:2.3.2.27] | (RefSeq) E3 ubiquitin-protein ligase TRIM56-like	transcription intermediary factor 1-alpha-like [Crassostrea gigas]
Crassostrea_gigas_newGene_9660	1.32733	0.518692	1.11327	0.00203156	up	--	--	piggyBac transposable element-derived protein 2-like [Crassostrea gigas]
Cg25554	0.358234	0.993066	-1.16008	0.00629875	down	Cellular Component: integral component of membrane (GO:0016021);; Molecular Function: semaphorin receptor activity (GO:0017154);;	K06820|9.8e-139|oaa:100078207|K06820 plexin A | (RefSeq) PLXNA2; plexin-A2 isoform X1	plexin-A2 [Crassostrea gigas]
Crassostrea_gigas_newGene_16288	3.92841	10.0972	-1.37663	1.83626e-06	down	Cellular Component: membrane (GO:0016020);;	K01316|7.8e-09|pcw:110214906|K01316 enterokinase [EC:3.4.21.9] | (RefSeq) TMPRSS15; enteropeptidase isoform X1	MAM and LDL-receptor class A domain-containing protein 1 [Crassostrea gigas]
Cg16437	0.0141977	0.98223	-1.63806	0.00107703	down	--	--	uncharacterized protein LOC105330839 [Crassostrea gigas]
Cg06275	2.94702	6.87831	-1.17804	6.4357e-08	down	Molecular Function: diphosphomevalonate decarboxylase activity (GO:0004163);; Molecular Function: ATP binding (GO:0005524);; Cellular Component: cytosol (GO:0005829);; Biological Process: isopentenyl diphosphate biosynthetic process, mevalonate pathway (GO:0019287);;	K10609|2.3e-25|amex:111188264|K10609 cullin 4 | (RefSeq) LOW QUALITY PROTEIN: cullin-4A-like	heat shock 70 kDa protein 12A-like [Crassostrea gigas]
Cg10316	0.61193	5.51154	-3.13001	2.86807e-155	down	Cellular Component: extracellular space (GO:0005615);;	K13963|5.8e-74|els:105019468|K13963 serpin B | (RefSeq) leukocyte elastase inhibitor-like	serpin B3-like [Crassostrea gigas]
Cg02205	0.0318887	1.80447	-2.12051	1.75039e-05	down	--	--	uncharacterized protein LOC105339307 isoform X1 [Crassostrea gigas]
Cg03569	9.64141	0.564416	3.54309	4.52754e-32	up	--	--	E3 ubiquitin-protein ligase XIAP isoform X1 [Crassostrea gigas]
Cg18760	0.375967	0.998382	-1.31622	6.92391e-07	down	Molecular Function: G-protein coupled receptor activity (GO:0004930);; Cellular Component: integral component of membrane (GO:0016021);;	K04307|2.4e-208|crg:105341989|K04307 relaxin family peptide receptor 2 | (RefSeq) relaxin receptor 2 isoform X1	uncharacterized protein LOC105317187 [Crassostrea gigas]
Cg09971	8.22089	2.89001	1.28693	8.57786e-05	up	--	--	uncharacterized protein LOC117690721 [Crassostrea gigas]
Cg02488	1.78334	19.2015	-2.70984	6.57927e-13	down	Biological Process: regulation of cytokine production (GO:0001817);; Biological Process: negative regulation of cytokine production (GO:0001818);; Biological Process: positive regulation of cytokine production (GO:0001819);; Biological Process: regulation of protein phosphorylation (GO:0001932);; Biological Process: positive regulation of protein phosphorylation (GO:0001934);; Biological Process:…	K23284|5.1e-89|crg:105320984|K23284 C1q-related factor | (RefSeq) C1q-related factor	C1q-related factor-like [Crassostrea gigas]
Cg29599	3.48125	0.535913	2.0145	1.18578e-06	up	Cellular Component: integral component of membrane (GO:0016021);; Biological Process: inositol phosphate dephosphorylation (GO:0046855);;	K16358|2.7e-06|npr:108804995|K16358 leucine-rich repeat and fibronectin type-III domain-containing protein 5 | (RefSeq) leucine-rich repeat and fibronectin type III domain-containing protein 1-like protein	leucine-rich repeat and fibronectin type-III domain-containing protein 5-like [Crassostrea gigas]
Cg12973	3.8565	0.36169	1.82271	0.000268654	up	Molecular Function: GTP binding (GO:0005525);;	K21922|2.7e-17|spis:111324965|K21922 BTB/POZ domain-containing protein KCTD21 | (RefSeq) uncharacterized protein LOC111324965	interferon-induced protein 44-like [Crassostrea gigas]
Cg05499	1.51265	4.71877	-1.63423	6.23973e-46	down	Cellular Component: integral component of membrane (GO:0016021);;	--	uncharacterized protein LOC105322331 isoform X2 [Crassostrea gigas]
Cg25763	1.65926	0.424496	1.63017	1.51825e-06	up	--	--	uncharacterized protein LOC117681563 isoform X3 [Crassostrea gigas]
Cg14050	0.485586	1.68836	-1.51197	1.44191e-05	down	Molecular Function: catalytic activity (GO:0003824);;	K23617|6.8e-14|obi:106871436|K23617 medium-chain acyl-CoA ligase, mitochondrial [EC:6.2.1.2] | (RefSeq) acyl-CoA synthetase family member 2, mitochondrial-like	medium-chain acyl-CoA ligase ACSF2, mitochondrial [Crassostrea gigas]
Cg25270	7.18011	16.779	-1.16908	1.47204e-06	down	--	--	mucin-5AC [Crassostrea gigas]
Cg10210	3.34187	0.839151	1.61777	1.47573e-05	up	--	K04984|5.9e-11|acep:105619991|K04984 transient receptor potential cation channel subfamily A member 1 | (RefSeq) transient receptor potential channel pyrexia-like	ankyrin repeat domain-containing protein 50 isoform X1 [Crassostrea gigas]
Cg23641	5.79316	1.61091	1.48741	0.000115016	up	Molecular Function: zinc ion binding (GO:0008270);;	K12035|1.2e-36|crg:105347194|K12035 tripartite motif-containing protein 71 [EC:2.3.2.27] | (RefSeq) uncharacterized protein LOC105347194 isoform X2	uncharacterized protein LOC105326978 [Crassostrea gigas]
Cg08421	0.015059	49.2771	-1.30057	0.00831859	down	--	--	uncharacterized protein LOC105347095 [Crassostrea gigas]
Cg25237	0.240536	2.55209	-2.37876	3.06032e-08	down	Cellular Component: extracellular region (GO:0005576);; Molecular Function: chitin binding (GO:0008061);; Cellular Component: integral component of membrane (GO:0016021);;	--	uncharacterized protein LOC105322633 isoform X3 [Crassostrea gigas]
Cg10609	0.293595	2.58499	-2.39033	4.01764e-09	down	Molecular Function: hydrolase activity, acting on ester bonds (GO:0016788);;	K18032|2.3e-268|crg:105319189|K18032 receptor-type tyrosine-protein phosphatase A [EC:3.1.3.48] | (RefSeq) receptor-type tyrosine-protein phosphatase epsilon-like	uncharacterized protein LOC117689142 [Crassostrea gigas]
Cg29555	0.127358	1.9832	-1.72815	0.000635174	down	Molecular Function: calcium ion binding (GO:0005509);; Biological Process: lipid catabolic process (GO:0016042);; Molecular Function: hydrolase activity (GO:0016787);;	--	uncharacterized protein LOC105319593 [Crassostrea gigas]
Cg22266	2.53505	0.835536	1.47912	5.78946e-11	up	Molecular Function: nucleic acid binding (GO:0003676);; Biological Process: DNA integration (GO:0015074);;	K13356|3.2e-92|nvi:100117878|K13356 alcohol-forming fatty acyl-CoA reductase [EC:1.2.1.84] | (RefSeq) putative fatty acyl-CoA reductase CG5065 isoform X1	uncharacterized protein LOC109620969 [Crassostrea gigas]
Cg13515	6.39737	14.4734	-1.17156	2.08884e-12	down	Cellular Component: integral component of membrane (GO:0016021);;	--	uncharacterized protein LOC105336535 isoform X1 [Crassostrea gigas]
Cg05966	4.51973	0.115552	2.97625	1.60094e-10	up	--	--	uncharacterized protein LOC105345638 [Crassostrea gigas]
Cg00161	10.1305	1.07894	2.76212	4.95363e-18	up	--	--	uncharacterized protein LOC105335809 isoform X1 [Crassostrea gigas]
Crassostrea_gigas_newGene_4501	0.823768	2.46861	-1.19907	0.00433633	down	Molecular Function: protein binding (GO:0005515);;	K10457|0.0e+00|crg:105323166|K10457 kelch-like protein 20 | (RefSeq) uncharacterized protein LOC105323166	kelch-like protein 5 isoform X2 [Crassostrea gigas]
Cg23676	12.1026	28.5382	-1.21781	8.60752e-12	down	Cellular Component: integral component of membrane (GO:0016021);;	--	uncharacterized protein LOC105319864 [Crassostrea gigas]
Cg10371	5.56332	1.69801	1.57597	1.8876e-11	up	Molecular Function: zinc ion binding (GO:0008270);;	K11997|2.1e-79|crg:105326056|K11997 tripartite motif-containing protein 2/3 | (RefSeq) tripartite motif-containing protein 55	uncharacterized protein LOC109618182 [Crassostrea gigas]
Cg22752	1.91206	5.21353	-1.39511	9.6833e-11	down	Biological Process: reproduction (GO:0000003);; Biological Process: negative regulation of transcription from RNA polymerase II promoter (GO:0000122);; Cellular Component: nuclear chromosome (GO:0000228);; Cellular Component: chromatin (GO:0000785);; Cellular Component: nuclear chromatin (GO:0000790);; Molecular Function: transcription regulatory region sequence-specific DNA binding (GO:0000976);…
iological Process: positive regulation of programmed cell death (GO:0043068);; Biological Process: negative regulation of programmed cell death (GO:0043069);; Biological Process: positive regulation of catalytic activity (GO:0043085);; Biological Process: negative regulation of catalytic activity (GO:0043086);; Biological Process: receptor metabolic process (GO:0043112);; Molecular Function: ion …	#DIV/0!	#DIV/0!
gical Process: negative regulation of ATP biosynthetic process (GO:2001170);; Biological Process: regulation of unsaturated fatty acid biosynthetic process (GO:2001279);; Biological Process: positive regulation of unsaturated fatty acid biosynthetic process (GO:2001280);;	#DIV/0!	#DIV/0!
Cg03309	2.09335	0.362887	1.66985	0.000377545	up	Molecular Function: zinc ion binding (GO:0008270);;	K08285|4.2e-81|crg:109621067|K08285 midline 1 [EC:2.3.2.27] | (RefSeq) E3 ubiquitin-protein ligase Midline-1-like	E3 ubiquitin-protein ligase Midline-1-like [Crassostrea virginica]
Cg03111	0.924598	4.27838	-1.78209	3.55892e-06	down	--	--	uncharacterized protein KIAA1143 homolog [Crassostrea gigas]
Crassostrea_gigas_newGene_15053	27.0214	9.92894	1.3691	1.01421e-16	up	Cellular Component: integral component of membrane (GO:0016021);;	--	hypothetical protein EGW08_005379 [Elysia chlorotica]
Cg27521	0	1.66362	-2.81992	3.66128e-09	down	--	--	uncharacterized protein LOC117689516 [Crassostrea gigas]
Cg30448	1092.48	461.162	1.02248	0.00667428	up	Cellular Component: integral component of membrane (GO:0016021);;	--	protein PLANT CADMIUM RESISTANCE 3 isoform X1 [Crassostrea gigas]
Cg05325	0.150791	0.76479	-1.88481	6.9714e-07	down	--	K02157|3.6e-06|obo:105275558|K02157 axin 1 | (RefSeq) axin-2 isoform X1	regulator of G-protein signaling protein-like [Crassostrea gigas]
Cg09575	1.6989	0.724795	1.06672	0.000595458	up	Molecular Function: metal ion binding (GO:0046872);;	K11564|2.1e-209|crg:105349002|K11564 kinetochore protein Mis18 | (RefSeq) uncharacterized protein LOC105349002	uncharacterized protein LOC105349002 [Crassostrea gigas]
Cg08804	0.60184	2.74577	-1.69192	3.72405e-05	down	Cellular Component: integral component of membrane (GO:0016021);;	--	cell death abnormality protein 1-like isoform X1 [Crassostrea gigas]
Cg07772	2.3802	5.24485	-1.08662	1.00521e-05	down	Molecular Function: nucleotide binding (GO:0000166);; Biological Process: immune effector process (GO:0002252);; Biological Process: immune system process (GO:0002376);; Biological Process: regulation of immune system process (GO:0002682);; Molecular Function: molecular_function (GO:0003674);; Molecular Function: nucleic acid binding (GO:0003676);; Molecular Function: RNA binding (GO:0003723);; M…	K22544|3.9e-107|crg:105326774|K22544 deoxynucleoside triphosphate triphosphohydrolase SAMHD1 [EC:3.1.5.-] | (RefSeq) deoxynucleoside triphosphate triphosphohydrolase SAMHD1-like isoform X1	deoxynucleoside triphosphate triphosphohydrolase SAMHD1-like [Crassostrea gigas]
Cg29694	29.3232	13.2146	1.05763	1.63503e-06	up	Molecular Function: zinc ion binding (GO:0008270);;	K12021|1.2e-64|myi:110459514|K12021 tripartite motif-containing protein 45 | (RefSeq) tripartite motif-containing protein 45-like isoform X1	tripartite motif-containing protein 45 isoform X2 [Crassostrea gigas]
Cg21391	7.42349	2.97415	1.23052	1.14711e-10	up	--	--	uncharacterized protein LOC105333425 isoform X1 [Crassostrea gigas]
Cg09021	0.122559	0.713248	-1.94384	1.25261e-06	down	Molecular Function: DNA binding (GO:0003677);; Cellular Component: nucleus (GO:0005634);;	--	uncharacterized protein LOC105345296 [Crassostrea gigas]
Cg29099	0.502212	0.159009	1.38998	5.53356e-05	up	Cellular Component: nucleus (GO:0005634);; Biological Process: apoptotic process (GO:0006915);;	K23221|2.2e-16|crg:105337416|K23221 nuclear apoptosis-inducing factor 1 | (RefSeq) uncharacterized protein LOC105337416	uncharacterized protein LOC117682292 [Crassostrea gigas]
Crassostrea_gigas_newGene_1227	26.8712	12.5975	1.0189	4.4513e-06	up	Molecular Function: zinc ion binding (GO:0008270);;	K11997|5.0e-159|crg:109620061|K11997 tripartite motif-containing protein 2/3 | (RefSeq) tripartite motif-containing protein 55-like	uncharacterized protein LOC117691287 isoform X2 [Crassostrea gigas]
Cg11544	0.87231	3.75717	-1.86443	5.93953e-09	down	--	--	uncharacterized protein LOC105338072 isoform X1 [Crassostrea gigas]
Cg00362	0.714152	0.198737	1.27874	0.00668232	up	--	K13297|8.6e-46|crg:105322070|K13297 receptor-type tyrosine-protein phosphatase T [EC:3.1.3.48] | (RefSeq) uncharacterized protein LOC105322070	uncharacterized protein LOC105323786 isoform X1 [Crassostrea gigas]
Cg09553	0.0133457	15.8084	-5.47402	1.37646e-39	down	Molecular Function: protein binding (GO:0005515);;	K16667|3.5e-84|crg:105324842|K16667 receptor-type tyrosine-protein phosphatase gamma [EC:3.1.3.48] | (RefSeq) phosphatidylinositol phosphatase PTPRQ	phosphatidylinositol phosphatase PTPRQ-like isoform X2 [Crassostrea gigas]
Cg27871	0.08963	0.636409	-1.44271	0.0050517	down	Molecular Function: RNA binding (GO:0003723);; Molecular Function: endopeptidase inhibitor activity (GO:0004866);; Cellular Component: extracellular space (GO:0005615);;	K06530|0.0e+00|crg:105340378|K06530 CD109 antigen | (RefSeq) CD109 antigen-like isoform X1	CD109 antigen isoform X2 [Crassostrea gigas]
Cg29654	6.0992	14.0905	-1.19772	2.88289e-14	down	Molecular Function: ATP binding (GO:0005524);; Molecular Function: kinase activity (GO:0016301);; Biological Process: mRNA 3'-end processing (GO:0031124);;	K14399|7.4e-201|crg:105326854|K14399 polyribonucleotide 5'-hydroxyl-kinase [EC:2.7.1.78] | (RefSeq) polyribonucleotide 5'-hydroxyl-kinase Clp1	polyribonucleotide 5'-hydroxyl-kinase Clp1 [Crassostrea gigas]
Crassostrea_gigas_newGene_13144	1.08343	3.40754	-1.33788	0.000183369	down	Molecular Function: catalytic activity (GO:0003824);; Biological Process: carbohydrate metabolic process (GO:0005975);;	K22078|3.5e-174|crg:105324264|K22078 protein-glucosylgalactosylhydroxylysine glucosidase [EC:3.2.1.107] | (RefSeq) acid trehalase-like protein 1	protein-glucosylgalactosylhydroxylysine glucosidase isoform X1 [Crassostrea gigas]
Cg02899	0.860632	0.158812	1.52512	0.00180954	up	--	K05695|3.3e-47|crg:105332268|K05695 receptor-type tyrosine-protein phosphatase F [EC:3.1.3.48] | (RefSeq) receptor-type tyrosine-protein phosphatase epsilon-like	multiple epidermal growth factor-like domains protein 10 isoform X1 [Crassostrea gigas]
Cg13376	0.225497	9.11931	-2.91544	2.79534e-10	down	Cellular Component: integral component of membrane (GO:0016021);;	--	--
Cg09518	0.651686	0.155175	1.67281	6.93961e-06	up	Cellular Component: integral component of membrane (GO:0016021);; Biological Process: regulation of apoptotic process (GO:0042981);;	K04570|1.1e-06|mun:110550083|K04570 Bcl-2-like 1 (apoptosis regulator Bcl-X) | (RefSeq) Bcl2l1; bcl-2-like protein 1 isoform X1	uncharacterized protein LOC105336916 isoform X3 [Crassostrea gigas]
Cg10786	3.21104	0.472775	2.05498	8.04437e-07	up	Cellular Component: integral component of membrane (GO:0016021);;	K23284|9.8e-90|crg:105343493|K23284 C1q-related factor | (RefSeq) complement C1q tumor necrosis factor-related protein 2-like	heavy metal-binding protein HIP-like isoform X1 [Crassostrea gigas]
Cg08085	1.63197	23.1448	-1.74894	0.000530689	down	--	K21754|5.5e-26|crg:105323554|K21754 BTB/POZ domain-containing protein KCTD1/15 | (RefSeq) uncharacterized protein LOC105323554 isoform X1	uncharacterized protein LOC105318959 [Crassostrea gigas]
Cg03539	0.221421	1.061	-1.67969	5.89173e-05	down	Cellular Component: immunological synapse (GO:0001772);; Cellular Component: integral component of membrane (GO:0016021);; Cellular Component: tetraspanin-enriched microdomain (GO:0097197);;	--	uncharacterized protein LOC105337920 [Crassostrea gigas]
Cg05015	7.76825	0.0919931	4.36507	7.46759e-31	up	--	--	putative uncharacterized protein DDB_G0274435 [Crassostrea gigas]
Crassostrea_gigas_newGene_11003	2.14802	0.761794	1.12788	0.00724437	up	Molecular Function: zinc ion binding (GO:0008270);;	K11997|2.9e-88|crg:105326056|K11997 tripartite motif-containing protein 2/3 | (RefSeq) tripartite motif-containing protein 55	tripartite motif-containing protein 3-like [Crassostrea gigas]
Cg09363	2.602	1.1469	1.04919	0.000154569	up	Molecular Function: zinc ion binding (GO:0008270);;	K12035|2.1e-13|crg:105325369|K12035 tripartite motif-containing protein 71 [EC:2.3.2.27] | (RefSeq) uncharacterized protein LOC105325369	tripartite motif-containing protein 45-like [Crassostrea gigas]
Crassostrea_gigas_newGene_15223	3.6548	0.33255	1.43852	0.00503016	up	Molecular Function: actin binding (GO:0003779);;	K06271|1.8e-68|crg:105339940|K06271 talin | (RefSeq) talin-2-like	LOW QUALITY PROTEIN: talin-1-like [Crassostrea gigas]
Cg02794	0.00276317	0.644838	-1.81868	0.000262015	down	Molecular Function: zinc ion binding (GO:0008270);;	K19930|7.7e-29|lhu:105679516|K19930 SRC kinase signaling inhibitor 1 | (RefSeq) LOW QUALITY PROTEIN: uncharacterized protein LOC105679516	uncharacterized protein LOC105317925 [Crassostrea gigas]
Cg23376	2.5971	0.476886	2.04298	2.31914e-09	up	Molecular Function: zinc ion binding (GO:0008270);;	K11997|4.2e-37|crg:105339791|K11997 tripartite motif-containing protein 2/3 | (RefSeq) tripartite motif-containing protein 2	uncharacterized protein LOC105346241 [Crassostrea gigas]
Cg08891	4.42922	1.96997	1.03003	0.000373222	up	Cellular Component: integral component of membrane (GO:0016021);; Molecular Function: transmembrane transporter activity (GO:0022857);;	K08220|8.3e-283|crg:105333404|K08220 MFS transporter, FLVCR family, feline leukemia virus subgroup C receptor-related protein | (RefSeq) feline leukemia virus subgroup C receptor-related protein 2	feline leukemia virus subgroup C receptor-related protein 2 isoform X2 [Crassostrea gigas]
Cg29518	7.18015	0.0782682	2.48707	2.80805e-07	up	--	--	uncharacterized protein LOC105321788 [Crassostrea gigas]
Cg12957	4.37655	0.687927	1.5833	0.00154676	up	Molecular Function: GTP binding (GO:0005525);;	K19511|9.5e-09|pdam:113670892|K19511 peroxidase [EC:1.11.1.7] | (RefSeq) uncharacterized protein LOC113670892	interferon-induced protein 44-like [Crassostrea gigas]
Crassostrea_gigas_newGene_1176	1.63528	5.36477	-1.34593	0.00120332	down	Molecular Function: zinc ion binding (GO:0008270);;	K11997|2.1e-263|crg:105332950|K11997 tripartite motif-containing protein 2/3 | (RefSeq) tripartite motif-containing protein 55-like isoform X2	uncharacterized protein LOC105331158 [Crassostrea gigas]
Crassostrea_gigas_newGene_8112	0.352624	2.59665	-2.3177	8.93973e-10	down	Molecular Function: nucleic acid binding (GO:0003676);; Biological Process: DNA integration (GO:0015074);;	K13356|3.3e-104|nvi:100117878|K13356 alcohol-forming fatty acyl-CoA reductase [EC:1.2.1.84] | (RefSeq) putative fatty acyl-CoA reductase CG5065 isoform X1	uncharacterized protein LOC117681202 [Crassostrea gigas]
Cg01082	2.6532	0.606476	1.58551	0.0002241	up	--	K06776|3.2e-104|crg:105328169|K06776 receptor-type tyrosine-protein phosphatase kappa [EC:3.1.3.48] | (RefSeq) receptor-type tyrosine-protein phosphatase epsilon	multiple epidermal growth factor-like domains protein 10 isoform X5 [Crassostrea gigas]
Cg26648	30.4947	67.6212	-1.13423	6.88661e-11	down	--	--	selenoprotein W-like [Daphnia magna]
Cg08203	6.43719	1.53334	1.75075	2.12686e-07	up	Molecular Function: methyltransferase activity (GO:0008168);; Biological Process: methylation (GO:0032259);;	--	uncharacterized protein LOC105343684 isoform X4 [Crassostrea gigas]
Cg00349	3.35395	0.291257	1.4816	0.00377428	up	--	K06776|7.3e-81|crg:105346217|K06776 receptor-type tyrosine-protein phosphatase kappa [EC:3.1.3.48] | (RefSeq) receptor-type tyrosine-protein phosphatase epsilon	multiple epidermal growth factor-like domains protein 10 isoform X2 [Crassostrea gigas]
Crassostrea_gigas_newGene_250	2.8335	0.0989766	2.94624	3.82035e-11	up	--	K11997|1.5e-104|crg:105326056|K11997 tripartite motif-containing protein 2/3 | (RefSeq) tripartite motif-containing protein 55	uncharacterized protein LOC117683204 [Crassostrea gigas]
Crassostrea_gigas_newGene_10243	0.258619	2.06573	-2.58049	3.8295e-17	down	--	--	uncharacterized protein LOC105345043 isoform X1 [Crassostrea gigas]
Cg10900	0.953749	30.3385	-2.50747	1.59325e-07	down	Biological Process: regulation of protein phosphorylation (GO:0001932);; Biological Process: negative regulation of protein phosphorylation (GO:0001933);; Molecular Function: molecular_function (GO:0003674);; Molecular Function: binding (GO:0005488);; Molecular Function: protein binding (GO:0005515);; Cellular Component: cellular_component (GO:0005575);; Cellular Component: extracellular region (…	K23284|3.9e-63|crg:105347609|K23284 C1q-related factor | (RefSeq) cerebellin-3	complement C1q tumor necrosis factor-related protein 3-like [Crassostrea gigas]
Cg12198	0.290524	0.090507	1.2664	0.00327457	up	Molecular Function: nucleic acid binding (GO:0003676);; Molecular Function: transcription factor activity, sequence-specific DNA binding (GO:0003700);; Biological Process: regulation of transcription, DNA-templated (GO:0006355);; Molecular Function: zinc ion binding (GO:0008270);; Biological Process: DNA integration (GO:0015074);;	K23593|3.0e-119|cpic:101941368|K23593 alpha-2-macroglobulin-like protein | (RefSeq) uncharacterized LOC101941368	uncharacterized protein LOC111100741 [Crassostrea virginica]
Cg27810	0.351999	7.08364	-2.67743	3.67759e-09	down	Molecular Function: aminopeptidase activity (GO:0004177);; Molecular Function: metallopeptidase activity (GO:0008237);; Molecular Function: zinc ion binding (GO:0008270);;	K13723|9.1e-121|lgi:LOTGIDRAFT_218512|K13723 endoplasmic reticulum aminopeptidase 2 [EC:3.4.11.-] | (RefSeq) hypothetical protein	endoplasmic reticulum aminopeptidase 1 [Crassostrea gigas]
Cg17181	0.694532	2.95552	-1.66029	2.72597e-05	down	Molecular Function: G-protein coupled receptor activity (GO:0004930);; Cellular Component: integral component of membrane (GO:0016021);;	K04261|9.4e-95|crg:105320131|K04261 prostaglandin E receptor 4 | (RefSeq) prostaglandin E2 receptor EP4 subtype	prostaglandin E2 receptor EP4 subtype [Crassostrea gigas]
Cg16426	19.3228	0.0779953	2.36259	9.59597e-07	up	Molecular Function: calcium ion binding (GO:0005509);; Cellular Component: plasma membrane (GO:0005886);; Biological Process: homophilic cell adhesion via plasma membrane adhesion molecules (GO:0007156);; Cellular Component: integral component of membrane (GO:0016021);;	K17353|1.8e-26|crg:105322031|K17353 tetraspanin-18 | (RefSeq) tetraspanin-1	uncharacterized protein LOC105331091 [Crassostrea gigas]
Crassostrea_gigas_newGene_2881	0.0814057	1.25236	-2.38367	2.78797e-07	down	--	K12646|3.9e-25|sko:102805200|K12646 ATP-dependent RNA helicase DDX58 [EC:3.6.4.13] | (RefSeq) probable ATP-dependent RNA helicase DDX58-like	uncharacterized protein LOC111131279 isoform X1 [Crassostrea virginica]
Cg27964	38.6847	107.865	-1.44375	5.91019e-14	down	Cellular Component: integral component of membrane (GO:0016021);;	K17353|9.8e-145|crg:105324947|K17353 tetraspanin-18 | (RefSeq) CD151 antigen	CD151 antigen [Crassostrea gigas]
Cg14115	2.16811	4.81637	-1.02422	0.00284966	down	Cellular Component: integral component of membrane (GO:0016021);; Biological Process: transmembrane transport (GO:0055085);;	K24200|0.0e+00|crg:105333571|K24200 P protein | (RefSeq) P protein	P protein isoform X2 [Crassostrea gigas]
Crassostrea_gigas_newGene_9882	0.310188	5.14781	-3.42372	1.11691e-28	down	--	K11800|8.8e-06|pxy:105389333|K11800 DDB1- and CUL4-associated factor 5 | (RefSeq) uncharacterized LOC105389333	uncharacterized protein LOC117688898 [Crassostrea gigas]
Cg11647	0	9.14646	-7.20519	4.77521e-98	down	Cellular Component: extracellular region (GO:0005576);; Molecular Function: chitin binding (GO:0008061);;	--	uncharacterized protein LOC117682827 [Crassostrea gigas]
Cg04775	1.38083	0.60493	1.01616	0.00119738	up	Cellular Component: integral component of membrane (GO:0016021);;	--	uncharacterized protein LOC105327807 isoform X1 [Crassostrea gigas]
Cg12340	8.61246	23.9749	-1.27955	0.000397468	down	Molecular Function: DNA binding (GO:0003677);; Molecular Function: transcription factor activity, sequence-specific DNA binding (GO:0003700);; Biological Process: regulation of transcription from RNA polymerase II promoter (GO:0006357);;	K11831|3.9e-251|crg:105342385|K11831 nuclear respiratory factor 1 | (RefSeq) DNA-binding protein P3A2-like	DNA-binding protein P3A2 [Crassostrea gigas]
Cg19320	5.38825	0.432066	1.97578	6.3161e-05	up	--	--	uncharacterized protein LOC117680739 [Crassostrea gigas]
Crassostrea_gigas_newGene_497	3.29036	1.34736	1.06031	0.00475245	up	Molecular Function: zinc ion binding (GO:0008270);;	K11997|1.9e-200|crg:105326056|K11997 tripartite motif-containing protein 2/3 | (RefSeq) tripartite motif-containing protein 55	E3 ubiquitin-protein ligase TRIM71-like [Crassostrea gigas]
Crassostrea_gigas_newGene_15267	0.505119	4.10186	-2.28788	6.85934e-08	down	Molecular Function: nucleic acid binding (GO:0003676);; Molecular Function: transcription factor activity, sequence-specific DNA binding (GO:0003700);; Biological Process: regulation of transcription, DNA-templated (GO:0006355);; Molecular Function: zinc ion binding (GO:0008270);; Biological Process: DNA integration (GO:0015074);;	K23593|5.3e-165|cpic:101941368|K23593 alpha-2-macroglobulin-like protein | (RefSeq) uncharacterized LOC101941368	uncharacterized protein LOC117684040 isoform X1 [Crassostrea gigas]
Crassostrea_gigas_newGene_5152	0.63812	3.45544	-1.47853	0.00243115	down	--	K05693|4.1e-09|myi:110440618|K05693 receptor-type tyrosine-protein phosphatase mu [EC:3.1.3.48] | (RefSeq) receptor-type tyrosine-protein phosphatase mu-like isoform X1	uncharacterized protein LOC109620951 isoform X3 [Crassostrea gigas]
Crassostrea_gigas_newGene_6440	0.333884	2.56723	-1.87359	7.01394e-05	down	--	K01518|1.8e-17|aplc:110987942|K01518 bis(5'-nucleosidyl)-tetraphosphatase [EC:3.6.1.17] | (RefSeq) uncharacterized protein LOC110987942 isoform X1	uncharacterized protein LOC117680990 [Crassostrea gigas]
Cg12173	2.49766	7.82099	-1.52602	1.12161e-08	down	--	--	vicilin-like seed storage protein At2g18540 isoform X2 [Crassostrea gigas]
Cg27808	0.140625	1.15809	-1.85691	0.000105548	down	Molecular Function: aminopeptidase activity (GO:0004177);; Molecular Function: metallopeptidase activity (GO:0008237);; Molecular Function: zinc ion binding (GO:0008270);;	K13723|3.9e-116|lgi:LOTGIDRAFT_218512|K13723 endoplasmic reticulum aminopeptidase 2 [EC:3.4.11.-] | (RefSeq) hypothetical protein	endoplasmic reticulum aminopeptidase 1 [Crassostrea gigas]
Cg11354	1.50799	0.624157	1.12035	8.4202e-05	up	--	--	uncharacterized protein LOC105319230 [Crassostrea gigas]
Cg04933	1.43602	0.473833	1.34996	3.8513e-05	up	Biological Process: intra-Golgi vesicle-mediated transport (GO:0006891);; Cellular Component: integral component of Golgi membrane (GO:0030173);;	K11154|1.4e-21|ocu:100342748|K11154 retinol dehydrogenase 16 [EC:1.1.1.-] | (RefSeq) retinol dehydrogenase 16	C-factor-like [Crassostrea gigas]
Cg07342	1.70333	0.533596	1.33656	0.000805154	up	--	K06776|2.4e-79|crg:105346217|K06776 receptor-type tyrosine-protein phosphatase kappa [EC:3.1.3.48] | (RefSeq) receptor-type tyrosine-protein phosphatase epsilon	multiple epidermal growth factor-like domains protein 10 isoform X3 [Crassostrea gigas]
Cg29616	1.40854	8.82213	-2.53751	3.50125e-38	down	--	K05126|1.2e-11|sko:100369916|K05126 proto-oncogene tyrosine-protein kinase Ret [EC:2.7.10.1] | (RefSeq) fibroblast growth factor receptor 3-like	uncharacterized protein LOC105347505 [Crassostrea gigas]
Cg26469	0.170723	1.15809	-2.16627	1.50442e-09	down	Cellular Component: integral component of membrane (GO:0016021);;	K08507|3.0e-110|crg:105346958|K08507 unconventional SNARE in the endoplasmic reticulum protein 1 | (RefSeq) vesicle transport protein USE1	vesicle transport protein USE1 [Crassostrea gigas]
Crassostrea_gigas_newGene_5272	0.362709	1.65383	-1.58199	0.000435131	down	--	--	myosin-4-like isoform X1 [Crassostrea gigas]
Crassostrea_gigas_newGene_6767	4.3198	1.84335	1.16757	2.82805e-17	up	Molecular Function: G-protein coupled receptor activity (GO:0004930);; Cellular Component: integral component of membrane (GO:0016021);;	K04261|4.9e-200|crg:105320130|K04261 prostaglandin E receptor 4 | (RefSeq) prostaglandin E2 receptor EP4 subtype	prostaglandin E2 receptor EP4 subtype [Crassostrea gigas]
Cg10303	6.2443	2.05137	1.35591	6.15487e-05	up	--	--	universal stress protein PHOS34 [Crassostrea gigas]
Crassostrea_gigas_newGene_2532	0.442935	3.74006	-2.16771	2.78556e-07	down	Molecular Function: molecular_function (GO:0003674);; Molecular Function: binding (GO:0005488);; Cellular Component: cellular_component (GO:0005575);; Cellular Component: extracellular region (GO:0005576);; Cellular Component: cell (GO:0005623);; Cellular Component: plasma membrane (GO:0005886);; Biological Process: response to stress (GO:0006950);; Biological Process: defense response (GO:000695…	--	uncharacterized protein LOC105331205 [Crassostrea gigas]
Cg13070	1.68154	18.7853	-3.05011	2.58134e-23	down	Molecular Function: transmembrane signaling receptor activity (GO:0004888);; Molecular Function: extracellular ligand-gated ion channel activity (GO:0005230);; Cellular Component: integral component of membrane (GO:0016021);;	K05312|7.9e-84|crg:105333547|K05312 nicotinic acetylcholine receptor, invertebrate | (RefSeq) acetylcholine receptor subunit alpha-like	acetylcholine receptor subunit alpha [Crassostrea gigas]
Cg11751	0.760128	1.5917	-1.03383	1.02721e-06	down	Molecular Function: nucleic acid binding (GO:0003676);; Molecular Function: helicase activity (GO:0004386);; Molecular Function: ATP binding (GO:0005524);;	K13131|0.0e+00|crg:105331793|K13131 ATP-dependent RNA helicase DDX20 [EC:3.6.4.13] | (RefSeq) probable ATP-dependent RNA helicase DDX20	probable ATP-dependent RNA helicase DDX20 [Crassostrea gigas]
Cg08841	0.242083	0.738163	-1.21412	0.00688672	down	Molecular Function: RNA binding (GO:0003723);;	K12171|7.8e-33|adf:107349948|K12171 E3 ubiquitin-protein ligase SH3RF [EC:2.3.2.27] | (RefSeq) uncharacterized LOC107349948	polyadenylate-binding protein 4-like [Crassostrea gigas]
Crassostrea_gigas_newGene_16718	4.47832	0.529646	1.80499	0.000231463	up	--	K15137|9.7e-10|nve:116618233|K15137 mediator of RNA polymerase II transcription subunit 19 | (RefSeq) uncharacterized protein LOC116618233	unnamed protein product [Mytilus coruscus]
Cg07330	4.3069	13.5132	-1.54961	1.47448e-09	down	Cellular Component: integral component of membrane (GO:0016021);; Molecular Function: transmembrane transporter activity (GO:0022857);;	K08202|0.0e+00|crg:105331460|K08202 MFS transporter, OCT family, solute carrier family 22 (organic cation transporter), member 4/5 | (RefSeq) organic cation transporter protein isoform X1	organic cation transporter protein [Crassostrea gigas]
Cg21384	4.60056	1.93133	1.04134	0.00433144	up	--	--	uncharacterized protein LOC105333431 isoform X1 [Crassostrea gigas]
Crassostrea_gigas_newGene_3981	3.29936	0.047554	2.39503	8.42253e-07	up	--	--	uncharacterized protein LOC117682779 [Crassostrea gigas]
Cg12883	33.3149	77.6689	-1.18999	7.06916e-10	down	--	--	uncharacterized protein LOC105325989 [Crassostrea gigas]
Cg14400	0.426066	1.2813	-1.22533	0.00490409	down	Molecular Function: protein binding (GO:0005515);;	K10443|5.9e-108|crg:105330626|K10443 kelch-like protein 2/3 | (RefSeq) kelch-like protein 3	kelch-like protein 3 [Crassostrea gigas]
Cg09146	4.86733	0.0705522	5.29638	5.70562e-73	up	Molecular Function: protein binding (GO:0005515);; Molecular Function: GTP binding (GO:0005525);;	K12800|2.2e-31|mze:106675363|K12800 NACHT, LRR and PYD domains-containing protein 3 | (RefSeq) NACHT, LRR and PYD domains-containing protein 12	uncharacterized protein LOC105339033 [Crassostrea gigas]
Cg24189	0.818581	36.6298	-2.64264	3.00672e-08	down	--	K10104|8.3e-126|crg:105317068|K10104 ficolin | (RefSeq) ryncolin-1-like isoform X1	uncharacterized protein LOC111132602 [Crassostrea virginica]
Cg08575	0.939992	12.2884	-1.57267	0.00211511	down	Cellular Component: integral component of membrane (GO:0016021);; Molecular Function: oxidoreductase activity, acting on CH-OH group of donors (GO:0016614);; Molecular Function: flavin adenine dinucleotide binding (GO:0050660);;	K00108|4.1e-98|acep:105624518|K00108 choline dehydrogenase [EC:1.1.99.1] | (RefSeq) glucose dehydrogenase [FAD, quinone]	alcohol dehydrogenase [acceptor] [Crassostrea gigas]
Cg09422	0.158096	2.58242	-3.62102	1.3065e-40	down	Molecular Function: protein binding (GO:0005515);;	K21440|1.6e-27|crg:109617064|K21440 ankyrin repeat domain-containing protein 50 | (RefSeq) uncharacterized protein LOC109617064	uncharacterized protein LOC105339020 isoform X1 [Crassostrea gigas]
Cg18932	1.04075	2.96053	-1.3924	6.18385e-07	down	--	--	FAD-dependent oxidoreductase domain-containing protein 2 isoform X1 [Crassostrea gigas]
Cg18362	8.12389	2.96348	1.13959	0.00601906	up	Biological Process: gamete generation (GO:0007276);;	K23222|3.0e-94|crg:105342912|K23222 nuclease HARBI1 [EC:3.1.-.-] | (RefSeq) putative nuclease HARBI1	putative nuclease HARBI1 [Crassostrea gigas]
Cg21397	0.663519	2.41992	-1.68608	1.13473e-08	down	Cellular Component: integral component of membrane (GO:0016021);;	K14616|7.5e-16|pcan:112557991|K14616 cubilin | (RefSeq) LOW QUALITY PROTEIN: cubilin-like	cubilin-like isoform X21 [Crassostrea gigas]
Cg02672	6.83972	25.7835	-1.53459	0.000130736	down	--	--	uncharacterized protein LOC117688208 [Crassostrea gigas]
Cg19510	20.8015	5.93792	1.67794	4.53516e-15	up	Cellular Component: integral component of membrane (GO:0016021);;	--	uncharacterized protein LOC105333822 [Crassostrea gigas]
Cg17278	4.90981	1.17308	1.53552	0.000464586	up	--	K19867|1.6e-17|crg:105320251|K19867 LIM domain-binding protein 3 | (RefSeq) PDZ and LIM domain protein 7	uncharacterized protein LOC105335099 isoform X1 [Crassostrea gigas]
Cg29197	0.708654	22.0085	-3.29924	1.21184e-14	down	--	--	uncharacterized protein LOC105326470 isoform X4 [Crassostrea gigas]
Crassostrea_gigas_newGene_14896	0.284326	1.97381	-1.60249	0.00116214	down	Molecular Function: scavenger receptor activity (GO:0005044);;	K05693|3.3e-72|crg:105331003|K05693 receptor-type tyrosine-protein phosphatase mu [EC:3.1.3.48] | (RefSeq) receptor-type tyrosine-protein phosphatase epsilon	multiple epidermal growth factor-like domains protein 10 [Crassostrea gigas]
Cg15321	3.70905	1.64448	1.0483	4.62132e-05	up	Molecular Function: zinc ion binding (GO:0008270);;	K08285|3.1e-38|crg:109621067|K08285 midline 1 [EC:2.3.2.27] | (RefSeq) E3 ubiquitin-protein ligase Midline-1-like	tripartite motif-containing protein 45-like [Crassostrea gigas]
Crassostrea_gigas_newGene_3490	0.0107072	8.45582	-7.33289	2.08378e-132	down	Cellular Component: integral component of membrane (GO:0016021);;	K16726|1.5e-23|crg:105330604|K16726 ankyrin repeat domain-containing protein 17 | (RefSeq) uncharacterized protein LOC105330604	uncharacterized protein LOC105335985 [Crassostrea gigas]
Crassostrea_gigas_newGene_14422	2.68915	8.34265	-1.41956	0.000126878	down	Molecular Function: metal ion binding (GO:0046872);;	--	uncharacterized protein LOC105337399 isoform X2 [Crassostrea gigas]
Cg30086	0.0316783	1.99961	-3.73969	9.95244e-20	down	Molecular Function: transferase activity, transferring glycosyl groups (GO:0016757);;	K13748|3.6e-94|crg:105324375|K13748 alpha-1,3-mannosylglycoprotein beta-1,4-N-acetylglucosaminyltransferase C [EC:2.4.1.201 2.4.1.145] | (RefSeq) alpha-1,3-mannosyl-glycoprotein 4-beta-N-acetylglucosaminyltransferase C	alpha-1,3-mannosyl-glycoprotein 4-beta-N-acetylglucosaminyltransferase C-like isoform X2 [Crassostrea gigas]
Cg30067	9.02982	23.3044	-1.3481	5.31576e-14	down	Molecular Function: iron ion binding (GO:0005506);; Molecular Function: oxidoreductase activity, acting on paired donors, with incorporation or reduction of molecular oxygen (GO:0016705);; Molecular Function: heme binding (GO:0020037);;	K07435|3.2e-204|crg:105322909|K07435 cytochrome P450 family 20 subfamily A | (RefSeq) cytochrome P450 20A1	cytochrome P450 20A1 [Crassostrea gigas]
Cg08845	0.550457	3.51475	-1.99082	2.58426e-06	down	Molecular Function: nucleic acid binding (GO:0003676);;	K07665|6.8e-29|api:107884559|K07665 two-component system, OmpR family, copper resistance phosphate regulon response regulator CusR | (RefSeq) uncharacterized protein LOC107884559	uncharacterized protein LOC105319183 [Crassostrea gigas]
Cg01319	0.0127992	2.29413	-5.08544	2.60921e-44	down	Molecular Function: copper ion binding (GO:0005507);; Cellular Component: integral component of membrane (GO:0016021);; Molecular Function: oxidoreductase activity (GO:0016491);; Biological Process: oxidation-reduction process (GO:0055114);;	K00423|2.6e-24|dpx:DAPPUDRAFT_317026|K00423 L-ascorbate oxidase [EC:1.10.3.3] | (RefSeq) hypothetical protein	laccase-5 [Crassostrea gigas]
Cg10221	3.90975	1.39867	1.28416	2.74438e-05	up	--	K16460|2.6e-10|obi:106872934|K16460 centrosomal protein CEP128 | (RefSeq) tankyrase-like protein	ankyrin repeat domain-containing protein 50 isoform X1 [Crassostrea gigas]
Cg08059	3.95959	9.15126	-1.03225	0.00698543	down	--	--	uncharacterized protein LOC105317134 [Crassostrea gigas]
Crassostrea_gigas_newGene_6279	8.87974	0.509989	3.11307	1.27998e-15	up	Molecular Function: nucleic acid binding (GO:0003676);; Molecular Function: transcription factor activity, sequence-specific DNA binding (GO:0003700);; Molecular Function: zinc ion binding (GO:0008270);; Biological Process: DNA integration (GO:0015074);;	K10289|2.7e-23|cmy:102943828|K10289 F-box protein 1 (cyclin F) | (RefSeq) cyclin-F-like	uncharacterized protein LOC105323550 isoform X6 [Crassostrea gigas]
Cg02486	5.58561	33.1208	-2.09911	1.8677e-08	down	Molecular Function: molecular_function (GO:0003674);; Molecular Function: structural molecule activity (GO:0005198);; Molecular Function: extracellular matrix structural constituent (GO:0005201);; Cellular Component: cellular_component (GO:0005575);; Cellular Component: extracellular region (GO:0005576);; Molecular Function: extracellular matrix constituent conferring elasticity (GO:0030023);; Mo…	K23284|2.3e-89|crg:105320984|K23284 C1q-related factor | (RefSeq) C1q-related factor	collagen alpha-2(VIII) chain isoform X1 [Crassostrea gigas]
Cg07911	2.15361	5.01031	-1.20368	9.91987e-12	down	Biological Process: protein polyubiquitination (GO:0000209);; Molecular Function: protease binding (GO:0002020);; Biological Process: positive regulation of antimicrobial peptide production (GO:0002225);; Biological Process: regulation of immune system process (GO:0002682);; Biological Process: positive regulation of immune system process (GO:0002684);; Biological Process: regulation of immune ef…	K16060|0.0e+00|crg:105334814|K16060 baculoviral IAP repeat-containing protein 2/3 | (RefSeq) baculoviral IAP repeat-containing protein 3 isoform X1	baculoviral IAP repeat-containing protein 3 isoform X1 [Crassostrea gigas]
Crassostrea_gigas_newGene_5624	0.67223	2.47403	-1.80782	3.58229e-21	down	Molecular Function: zinc ion binding (GO:0008270);;	K11997|1.3e-223|crg:105332950|K11997 tripartite motif-containing protein 2/3 | (RefSeq) tripartite motif-containing protein 55-like isoform X2	uncharacterized protein LOC105320675 [Crassostrea gigas]
Crassostrea_gigas_newGene_2098	35.6785	0.00736688	1.80227	0.000158099	up	--	--	coadhesin-like [Crassostrea gigas]
Cg14687	8.88861	1.46773	2.29608	3.23923e-15	up	Cellular Component: integral component of membrane (GO:0016021);;	--	uncharacterized protein LOC105327640 isoform X1 [Crassostrea gigas]
Cg17783	10.3777	21.4203	-1.04004	1.13154e-09	down	Cellular Component: integral component of membrane (GO:0016021);;	K06532|0.0e+00|crg:105345788|K06532 prominin 1 | (RefSeq) prominin-1-A	prominin-1-A isoform X1 [Crassostrea gigas]
Crassostrea_gigas_newGene_12254	7.5553	0.221693	2.84789	9.50108e-10	up	Molecular Function: CoA-transferase activity (GO:0008410);;	K01796|2.1e-21|crg:105335665|K01796 alpha-methylacyl-CoA racemase [EC:5.1.99.4] | (RefSeq) alpha-methylacyl-CoA racemase isoform X1	alpha-methylacyl-CoA racemase isoform X3 [Crassostrea gigas]
Crassostrea_gigas_newGene_8781	1.98258	0.66155	1.18933	0.00664907	up	--	K00914|3.2e-19|tsp:Tsp_00889|K00914 phosphatidylinositol 3-kinase [EC:2.7.1.137] | (RefSeq) phosphatidylinositol 3-kinase catalytic subunit type 3	piggyBac transposable element-derived protein 3-like [Crassostrea gigas]
Crassostrea_gigas_newGene_14672	1.42511	0.076817	3.27998	1.6024e-18	up	Molecular Function: nucleic acid binding (GO:0003676);; Biological Process: DNA integration (GO:0015074);;	K06065|1.1e-264|xma:102225078|K06065 nuclear receptor co-repressor 2 | (RefSeq) uncharacterized protein LOC102225078	LOW QUALITY PROTEIN: uncharacterized protein LOC111101920 [Crassostrea virginica]
Cg00759	1.28587	0.158756	1.59573	0.00168651	up	Biological Process: regulation of apoptotic process (GO:0042981);;	--	unnamed protein product [Mytilus coruscus]
Cg17037	1.9668	0.645894	1.26782	0.00195407	up	Cellular Component: integral component of membrane (GO:0016021);; Molecular Function: transmembrane transporter activity (GO:0022857);;	K14387|0.0e+00|crg:105345095|K14387 solute carrier family 5 (high affinity choline transporter), member 7 | (RefSeq) high-affinity choline transporter 1 isoform X1	high-affinity choline transporter 1 [Crassostrea gigas]
Crassostrea_gigas_newGene_3593	6.51009	1.01825	2.25726	8.34447e-11	up	--	--	uncharacterized protein LOC117683637 isoform X3 [Crassostrea gigas]
Cg04341	0.238349	0.691401	-1.37583	7.69825e-06	down	Molecular Function: protein binding (GO:0005515);; Cellular Component: cellular_component (GO:0005575);; Cellular Component: cell (GO:0005623);; Cellular Component: plasma membrane (GO:0005886);; Cellular Component: integral component of plasma membrane (GO:0005887);; Cellular Component: membrane (GO:0016020);; Cellular Component: integral component of membrane (GO:0016021);; Cellular Component: …	K17256|2.9e-39|myi:110451692|K17256 insulin-like growth factor-binding protein complex acid labile subunit | (RefSeq) carboxypeptidase N subunit 2-like	leucine-rich repeat-containing protein let-4 [Crassostrea gigas]
Cg21877	6.63519	1.77055	1.73389	6.21463e-13	up	Cellular Component: integral component of membrane (GO:0016021);;	K06550|3.2e-144|crg:105322288|K06550 L1 cell adhesion molecule | (RefSeq) neural cell adhesion molecule L1-like isoform X1	neural cell adhesion molecule L1 isoform X1 [Crassostrea gigas]
Cg02441	3.75544	0.511347	2.10487	6.20497e-07	up	Molecular Function: carbohydrate binding (GO:0030246);;	K06563|1.6e-18|crg:105326306|K06563 C-type lectin domain family 4 member M | (RefSeq) lectin BRA-3	collectin-12 [Crassostrea gigas]
Crassostrea_gigas_newGene_11979	1.19013	0.274104	1.77176	9.94095e-06	up	Molecular Function: kynurenine 3-monooxygenase activity (GO:0004502);; Cellular Component: mitochondrion (GO:0005739);; Biological Process: tryptophan catabolic process (GO:0006569);; Cellular Component: integral component of membrane (GO:0016021);; Biological Process: quinolinate biosynthetic process (GO:0019805);; Biological Process: 'de novo' NAD biosynthetic process from tryptophan (GO:003435…	K00486|7.7e-228|crg:105326901|K00486 kynurenine 3-monooxygenase [EC:1.14.13.9] | (RefSeq) kynurenine 3-monooxygenase	kynurenine 3-monooxygenase [Crassostrea gigas]
Cg05641	10.9276	4.6488	1.04393	0.00230624	up	--	--	uncharacterized protein LOC105347831 [Crassostrea gigas]
Cg00736	1.35468	7.74199	-1.98616	3.9833e-07	down	--	--	uncharacterized protein LOC105346527 [Crassostrea gigas]
Cg29500	1.66305	7.2411	-1.89682	1.42547e-10	down	--	--	uncharacterized protein LOC117689440 isoform X1 [Crassostrea gigas]
Cg12364	0.00508667	14.6141	-5.11716	1.91923e-34	down	--	K16353|4.7e-07|nve:5513116|K16353 protein sidekick | (RefSeq) uncharacterized protein LOC5513116	fucolectin-7-like [Crassostrea gigas]
Cg26894	58.5602	7.95552	2.26794	5.435e-09	up	--	--	uncharacterized protein LOC105322832 [Crassostrea gigas]
Cg18729	32.2231	6.44073	2.12703	2.69672e-18	up	Cellular Component: integral component of membrane (GO:0016021);;	--	uncharacterized protein LOC117684747 [Crassostrea gigas]
Cg14870	41.563	0.849402	2.4212	6.48394e-07	up	--	--	uncharacterized protein LOC105346989 [Crassostrea gigas]
Cg23948	4.41768	9.43252	-1.08616	1.49328e-11	down	Cellular Component: integral component of membrane (GO:0016021);;	K20051|0.0e+00|crg:105335270|K20051 low-density lipoprotein receptor-related protein 4 | (RefSeq) low-density lipoprotein receptor-related protein 6	low-density lipoprotein receptor-related protein 6 [Crassostrea gigas]
Cg30082	2.16749	0.277741	1.78424	0.000247362	up	--	--	uncharacterized protein LOC105337780 [Crassostrea gigas]
Cg20315	2.63862	0.995723	1.19613	0.000215356	up	--	--	uncharacterized protein LOC105325210 [Crassostrea gigas]
Cg25378	0.0272062	4.14763	-1.88563	0.000147425	down	Molecular Function: microtubule binding (GO:0008017);;	--	stabilizer of axonemal microtubules 2 [Crassostrea gigas]
Cg11229	1.65453	4.93993	-1.36427	0.000114013	down	Molecular Function: hydrolase activity (GO:0016787);;	K01050|0.0e+00|crg:105324424|K01050 cholinesterase [EC:3.1.1.8] | (RefSeq) cAMP-regulated D2 protein	cAMP-regulated D2 protein [Crassostrea gigas]
Cg13520	4.23929	0.74309	1.56727	0.00126555	up	--	--	uncharacterized protein LOC105336537 isoform X3 [Crassostrea gigas]
Cg20625	0.210475	1.49887	-1.41141	0.00629429	down	Molecular Function: nucleic acid binding (GO:0003676);; Molecular Function: helicase activity (GO:0004386);; Molecular Function: ATP binding (GO:0005524);;	K03654|4.5e-20|aqu:100639172|K03654 ATP-dependent DNA helicase RecQ [EC:3.6.4.12] | (RefSeq) ATP-dependent DNA helicase Q-like SIM	ATP-dependent DNA helicase Q-like SIM [Crassostrea gigas]
Cg14434	1.90811	4.41343	-1.07428	0.000905428	down	Cellular Component: integral component of membrane (GO:0016021);;	--	transmembrane protein 26 [Crassostrea gigas]
Cg08476	1.12589	3.82821	-1.33096	0.00222584	down	--	K05204|1.9e-18|sanh:107676315|K05204 glutamate receptor, ionotropic kainate 4 | (RefSeq) uncharacterized protein LOC107676315	uncharacterized protein LOC105333816 isoform X1 [Crassostrea gigas]
Cg15932	0.788057	5.19546	-1.63724	0.000877293	down	--	K17388|1.2e-26|crg:105336327|K17388 Rho-associated protein kinase 2 [EC:2.7.11.1] | (RefSeq) uncharacterized protein LOC105336327	uncharacterized protein LOC105328040 isoform X1 [Crassostrea gigas]
Cg24104	0	0.490533	-4.26421	3.05841e-24	down	Cellular Component: integral component of membrane (GO:0016021);;	K03264|7.2e-112|crg:105348015|K03264 translation initiation factor 6 | (RefSeq) uncharacterized protein LOC105348015	uncharacterized protein LOC105319743 isoform X1 [Crassostrea gigas]
Crassostrea_gigas_newGene_13300	0.347215	1.2639	-1.49944	3.18849e-05	down	--	K12843|4.2e-10|crg:105338485|K12843 U4/U6 small nuclear ribonucleoprotein PRP3 | (RefSeq) uncharacterized protein LOC105338485	--
Cg07860	0	3.963	-2.8809	1.56601e-09	down	Molecular Function: ion channel activity (GO:0005216);; Cellular Component: integral component of membrane (GO:0016021);;	K04978|3.4e-116|myi:110467020|K04978 transient receptor potential cation channel subfamily M member 3 | (RefSeq) transient receptor potential cation channel subfamily M member 1-like	transient receptor potential cation channel subfamily M member-like 2 [Crassostrea gigas]
Crassostrea_gigas_newGene_536	0.444805	1.89445	-1.34512	0.00614221	down	--	K01166|3.0e-17|crg:105318465|K01166 ribonuclease T2 [EC:4.6.1.19] | (RefSeq) ribonuclease Oy-like	ribonuclease Oy-like [Crassostrea gigas]
Cg29871	2.32014	19.2661	-2.60839	1.37793e-15	down	--	K23284|7.3e-53|crg:105329127|K23284 C1q-related factor | (RefSeq) complement C1q tumor necrosis factor-related protein 3-like	complement C1q tumor necrosis factor-related protein 3-like [Crassostrea gigas]
Cg21508	0.534441	1.71506	-1.54715	1.31227e-08	down	Molecular Function: G-protein coupled receptor activity (GO:0004930);; Cellular Component: integral component of membrane (GO:0016021);;	K04211|2.4e-128|myi:110457352|K04211 neurotensin receptor 1 | (RefSeq) neurotensin receptor type 1-like	neurotensin receptor type 1-like isoform X2 [Crassostrea virginica]
Cg25271	6.20176	2.18817	1.22139	0.00117811	up	Molecular Function: molecular_function (GO:0003674);; Molecular Function: catalytic activity (GO:0003824);; Molecular Function: thiol-dependent ubiquitin-specific protease activity (GO:0004843);; Molecular Function: binding (GO:0005488);; Molecular Function: protein binding (GO:0005515);; Cellular Component: cellular_component (GO:0005575);; Cellular Component: intracellular (GO:0005622);; Cellul…	--	uncharacterized protein LOC105340054 [Crassostrea gigas]
Cg01615	1.25838	0.391338	1.2062	0.00882238	up	Cellular Component: integral component of membrane (GO:0016021);;	K10104|9.9e-211|crg:105327049|K10104 ficolin | (RefSeq) microfibril-associated glycoprotein 4	microfibril-associated glycoprotein 4-like isoform X20 [Crassostrea gigas]
Cg19052	0.0379047	1.60377	-2.95947	1.00887e-10	down	--	K07665|9.0e-26|api:107884559|K07665 two-component system, OmpR family, copper resistance phosphate regulon response regulator CusR | (RefSeq) uncharacterized protein LOC107884559	uncharacterized protein LOC105326988 [Crassostrea gigas]
Cg29181	15.7191	204.876	-2.09892	1.37985e-05	down	Molecular Function: lipid binding (GO:0008289);;	--	uncharacterized protein LOC105334533 isoform X2 [Crassostrea gigas]
Cg20178	1.93277	8.35618	-1.96472	7.40673e-15	down	Biological Process: purine ribonucleoside monophosphate biosynthetic process (GO:0009168);; Molecular Function: deaminase activity (GO:0019239);;	K01488|2.0e-204|crg:105336152|K01488 adenosine deaminase [EC:3.5.4.4] | (RefSeq) adenosine deaminase	adenosine deaminase [Crassostrea gigas]
Crassostrea_gigas_newGene_11659	0.710251	0.286826	1.0776	0.00336631	up	Molecular Function: G-protein coupled receptor activity (GO:0004930);; Cellular Component: integral component of membrane (GO:0016021);;	K04282|1.6e-102|myi:110443642|K04282 thyrotropin-releasing hormone receptor | (RefSeq) FMRFamide receptor-like	FMRFamide receptor [Crassostrea gigas]
Cg08332	0.178919	1.99332	-2.60687	2.75278e-11	down	Cellular Component: integral component of membrane (GO:0016021);;	--	uncharacterized protein LOC105331749 [Crassostrea gigas]
Crassostrea_gigas_newGene_2134	1.48316	0.125915	2.10497	1.71523e-05	up	Molecular Function: zinc ion binding (GO:0008270);;	K19410|2.0e-30|dpa:109543998|K19410 inner nuclear membrane protein Man1 | (RefSeq) uncharacterized protein LOC109543998 isoform X1	uncharacterized protein LOC117688269 [Crassostrea gigas]
Cg12013	5.53198	18.3176	-1.47693	3.16833e-05	down	Cellular Component: integral component of membrane (GO:0016021);;	--	uncharacterized protein LOC105321917 isoform X2 [Crassostrea gigas]
Cg15965	0.373117	2.24978	-1.36578	0.00812611	down	Molecular Function: sulfotransferase activity (GO:0008146);; Cellular Component: integral component of membrane (GO:0016021);;	K09673|1.6e-138|crg:109619736|K09673 carbohydrate 4-sulfotransferase 9 [EC:2.8.2.-] | (RefSeq) uncharacterized protein LOC109619736	uncharacterized protein LOC109619736 [Crassostrea gigas]
Cg06729	11.8789	0.154056	1.718	0.000390736	up	Cellular Component: cellular_component (GO:0005575);; Cellular Component: intracellular (GO:0005622);; Cellular Component: cell (GO:0005623);; Cellular Component: microtubule organizing center (GO:0005815);; Cellular Component: cytoskeleton (GO:0005856);; Cellular Component: cilium (GO:0005929);; Biological Process: chemotaxis (GO:0006935);; Biological Process: organelle organization (GO:0006996)…	K16550|5.9e-47|crg:105317681|K16550 protein fantom | (RefSeq) protein fantom isoform X1	protein fantom isoform X4 [Crassostrea gigas]
Cg02415	0.391693	0.162948	1.07016	0.00135394	up	Molecular Function: nucleic acid binding (GO:0003676);; Biological Process: DNA integration (GO:0015074);;	K13356|6.6e-86|nvi:100117878|K13356 alcohol-forming fatty acyl-CoA reductase [EC:1.2.1.84] | (RefSeq) putative fatty acyl-CoA reductase CG5065 isoform X1	uncharacterized protein LOC117688649 [Crassostrea gigas]
Crassostrea_gigas_newGene_10287	1.15976	2.34301	-1.16961	1.48345e-06	down	--	K03264|3.6e-10|crg:105348015|K03264 translation initiation factor 6 | (RefSeq) uncharacterized protein LOC105348015	uncharacterized protein LOC117680450 isoform X2 [Crassostrea gigas]
Cg03508	0.55596	2.16573	-1.33232	0.00515101	down	Cellular Component: integral component of membrane (GO:0016021);;	--	uncharacterized protein LOC117692997 [Crassostrea gigas]
Cg10318	1.71592	4.97354	-1.26128	0.00130458	down	Cellular Component: extracellular space (GO:0005615);;	K13963|5.9e-20|oro:101363351|K13963 serpin B | (RefSeq) SERPINB6; serpin B6 isoform X1	serpin B6-like [Crassostrea gigas]
Cg08161	0.0656213	0.605723	-2.16954	1.16419e-06	down	Molecular Function: zinc ion binding (GO:0008270);;	K12035|1.5e-06|crg:105329800|K12035 tripartite motif-containing protein 71 [EC:2.3.2.27] | (RefSeq) uncharacterized protein LOC105329800 isoform X1	uncharacterized protein LOC111100742 [Crassostrea virginica]
Cg00103	0.0313577	1.90087	-2.66045	2.2851e-08	down	--	K10104|1.2e-183|crg:105336429|K10104 ficolin | (RefSeq) ficolin-2	ficolin-2-like isoform X1 [Crassostrea gigas]
Cg24159	4.72747	1.65122	1.41087	5.55952e-12	up	Biological Process: microtubule cytoskeleton organization (GO:0000226);; Biological Process: organelle organization (GO:0006996);; Biological Process: nucleus organization (GO:0006997);; Biological Process: cytoskeleton organization (GO:0007010);; Biological Process: microtubule-based process (GO:0007017);; Biological Process: multicellular organism development (GO:0007275);; Biological Process: …	--	WD repeat-containing protein 73 [Crassostrea gigas]
Cg07414	4.34399	1.39613	1.43741	1.14728e-06	up	--	--	protein PELPK1-like [Crassostrea gigas]
Cg27193	1.3802	0.164219	2.03856	8.32523e-06	up	Molecular Function: DNA binding (GO:0003677);; Molecular Function: protein dimerization activity (GO:0046983);;	K22762|1.4e-47|hmg:101234994|K22762 desumoylating isopeptidase 1 [EC:3.4.-.-] | (RefSeq) zinc finger BED domain-containing protein 4-like	zinc finger BED domain-containing protein 1-like [Crassostrea gigas]
Cg05946	1.6761	0.579351	1.36997	6.2567e-07	up	Cellular Component: cellular_component (GO:0005575);; Cellular Component: intracellular (GO:0005622);; Cellular Component: cell (GO:0005623);; Cellular Component: nucleus (GO:0005634);; Cellular Component: nucleoplasm (GO:0005654);; Cellular Component: cytoplasm (GO:0005737);; Cellular Component: cytosol (GO:0005829);; Biological Process: DNA packaging (GO:0006323);; Biological Process: chromatin…	K11504|3.6e-203|crg:105337750|K11504 centromere protein L | (RefSeq) centromere protein L	centromere protein L [Crassostrea gigas]
Cg03607	0.269475	1.52676	-2.17402	4.64869e-12	down	Molecular Function: scavenger receptor activity (GO:0005044);; Cellular Component: membrane (GO:0016020);;	--	uncharacterized protein LOC105328294 [Crassostrea gigas]
Cg09761	2.71529	10.5539	-1.66279	3.43887e-06	down	--	K10104|7.8e-64|crg:105322529|K10104 ficolin | (RefSeq) microfibril-associated glycoprotein 4	ryncolin-1 isoform X2 [Crassostrea gigas]
Cg22355	44.018	6.52386	2.43486	1.82073e-17	up	--	--	uncharacterized protein LOC105329895 isoform X1 [Crassostrea gigas]
Cg24188	1.02192	6.60392	-2.37998	5.62066e-15	down	--	K10104|7.7e-151|crg:105322529|K10104 ficolin | (RefSeq) microfibril-associated glycoprotein 4	tenascin-R-like [Crassostrea virginica]
Cg11415	1.89775	7.32804	-1.75587	5.30833e-09	down	Molecular Function: serine-type endopeptidase inhibitor activity (GO:0004867);; Biological Process: hyaluronan metabolic process (GO:0030212);;	K19014|5.0e-126|shr:100925940|K19014 inter-alpha-trypsin inhibitor heavy chain H1 | (RefSeq) inter-alpha-trypsin inhibitor heavy chain H1	inter-alpha-trypsin inhibitor heavy chain H3 [Crassostrea gigas]
Cg23788	0.93482	2.31662	-1.13365	0.00161065	down	Molecular Function: scavenger receptor activity (GO:0005044);; Cellular Component: membrane (GO:0016020);;	K19899|1.8e-29|malb:109957957|K19899 pancreatic secretory granule membrane major glycoprotein GP2 | (RefSeq) uromodulin-like	spindle assembly checkpoint component MAD1 [Crassostrea gigas]
Cg25071	23.7678	7.54412	1.5971	5.07988e-44	up	Cellular Component: extracellular space (GO:0005615);;	K13963|7.1e-77|els:105019468|K13963 serpin B | (RefSeq) leukocyte elastase inhibitor-like	leukocyte elastase inhibitor-like [Crassostrea gigas]
Cg15308	3.59779	21.5673	-2.21483	7.21278e-11	down	--	--	uncharacterized protein LOC105337979 isoform X2 [Crassostrea gigas]
Cg10076	8.38835	3.60408	1.01319	0.00677675	up	Cellular Component: integral component of membrane (GO:0016021);;	--	uncharacterized protein LOC105321749 isoform X19 [Crassostrea gigas]
Cg11795	0	3.47804	-4.82949	5.28579e-33	down	Biological Process: immune effector process (GO:0002252);; Biological Process: immune system process (GO:0002376);; Molecular Function: GTP binding (GO:0005525);; Biological Process: response to stress (GO:0006950);; Biological Process: defense response (GO:0006952);; Biological Process: immune response (GO:0006955);; Biological Process: biological_process (GO:0008150);; Biological Process: respo…	--	interferon-induced protein 44-like isoform X1 [Crassostrea gigas]
Cg15516	4.98435	10.4101	-1.06219	6.01018e-13	down	--	--	uncharacterized protein LOC105344256 isoform X2 [Crassostrea gigas]
Cg10553	1.83445	0	6.06563	1.17329e-53	up	--	K20839|1.7e-15|hmg:101237435|K20839 ribosomal protein S6 kinase-like | (RefSeq) uncharacterized LOC101237435	uncharacterized protein LOC111135280 [Crassostrea virginica]
Cg14600	49.1436	519.971	-3.20824	1.213e-46	down	Molecular Function: structural constituent of ribosome (GO:0003735);; Cellular Component: ribosome (GO:0005840);; Biological Process: translation (GO:0006412);;	K02966|1.5e-80|crg:105335239|K02966 small subunit ribosomal protein S19e | (RefSeq) 40S ribosomal protein S19 isoform X2	40S ribosomal protein S19 isoform X1 [Crassostrea gigas]
Cg02777	3.27806	1.33588	1.19253	2.69781e-08	up	Molecular Function: calcium ion binding (GO:0005509);;	--	sarcoplasmic calcium-binding proteins II, V, VI, and VII [Crassostrea gigas]
Cg29961	4.9494	2.17741	1.02543	0.00129912	up	Molecular Function: G-protein coupled receptor activity (GO:0004930);; Biological Process: cell surface receptor signaling pathway (GO:0007166);; Cellular Component: integral component of membrane (GO:0016021);;	--	Prolyl-tRNA editing protein ProX [Mizuhopecten yessoensis]
Cg30290	5.09057	13.285	-1.36098	1.11019e-14	down	--	K13196|4.1e-79|crg:105330612|K13196 zinc finger protein ubi-d4 | (RefSeq) uncharacterized protein LOC105330612	uncharacterized protein LOC105337409 [Crassostrea gigas]
Cg10290	27.9778	93.3103	-1.5773	6.73716e-08	down	Biological Process: cell morphogenesis (GO:0000902);; Biological Process: cell morphogenesis involved in differentiation (GO:0000904);; Biological Process: regulation of cell growth (GO:0001558);; Biological Process: system process (GO:0003008);; Molecular Function: molecular_function (GO:0003674);; Molecular Function: receptor binding (GO:0005102);; Molecular Function: integrin binding (GO:00051…	K05467|2.5e-179|crg:105345860|K05467 angiopoietin 4 | (RefSeq) ryncolin-1	ryncolin-1 [Crassostrea gigas]
Cg28868	3.46972	1.05505	1.51281	2.82572e-07	up	Molecular Function: GTPase activator activity (GO:0005096);; Biological Process: regulation of small GTPase mediated signal transduction (GO:0051056);;	--	ral GTPase-activating protein subunit beta isoform X2 [Crassostrea gigas]
Cg00588	2.95638	0.621741	1.56074	0.000681816	up	--	K21754|2.6e-08|crg:105323828|K21754 BTB/POZ domain-containing protein KCTD1/15 | (RefSeq) uncharacterized protein LOC105323828	zinc finger MYM-type protein 3 [Crassostrea gigas]
Cg21875	0.670367	5.3564	-1.75563	0.000345606	down	Cellular Component: integral component of membrane (GO:0016021);;	K06550|1.4e-198|crg:105322288|K06550 L1 cell adhesion molecule | (RefSeq) neural cell adhesion molecule L1-like isoform X1	neurofascin isoform X1 [Crassostrea gigas]
Cg14174	0.0874095	0.675595	-1.47781	0.00397961	down	--	--	uncharacterized protein LOC105331105 isoform X2 [Crassostrea gigas]
Crassostrea_gigas_newGene_2737	7.2387	3.44139	1.00064	2.34275e-07	up	Molecular Function: protein binding (GO:0005515);; Molecular Function: zinc ion binding (GO:0008270);;	K11997|2.2e-188|crg:105326056|K11997 tripartite motif-containing protein 2/3 | (RefSeq) tripartite motif-containing protein 55	tripartite motif-containing protein 55 [Crassostrea gigas]
Cg06294	0.0878105	1.46373	-2.35561	4.49077e-07	down	Cellular Component: extracellular space (GO:0005615);; Molecular Function: lipid binding (GO:0008289);;	K05399|1.2e-183|crg:105344848|K05399 lipopolysaccharide-binding protein | (RefSeq) lipopolysaccharide-binding protein-like	lipopolysaccharide-binding protein-like precursor [Crassostrea gigas]
Cg17113	8.84489	2.05058	1.69806	7.50289e-06	up	Cellular Component: Golgi membrane (GO:0000139);; Biological Process: protein glycosylation (GO:0006486);; Cellular Component: integral component of membrane (GO:0016021);; Molecular Function: transferase activity, transferring glycosyl groups (GO:0016757);;	K03877|3.1e-215|crg:105317388|K03877 beta-1,3-galactosyltransferase 5 [EC:2.4.1.-] | (RefSeq) beta-1,3-galactosyltransferase 5-like isoform X1	beta-1,3-galactosyltransferase 5 [Crassostrea gigas]
Crassostrea_gigas_newGene_14667	0	5.03608	-1.44487	0.00355923	down	--	--	uncharacterized protein LOC117685930 [Crassostrea gigas]
Cg29851	29.7912	5.85643	1.80871	8.60826e-06	up	Cellular Component: integral component of membrane (GO:0016021);;	--	interferon alpha-inducible protein 27-like protein 2B [Crassostrea gigas]
Cg25499	1.02034	16.7752	-1.60325	0.00166759	down	Cellular Component: collagen trimer (GO:0005581);;	--	short-chain collagen C4-like [Crassostrea gigas]
Cg03310	0.720379	0.114896	1.42579	0.00567703	up	Molecular Function: zinc ion binding (GO:0008270);;	K08285|1.5e-244|crg:109621067|K08285 midline 1 [EC:2.3.2.27] | (RefSeq) E3 ubiquitin-protein ligase Midline-1-like	E3 ubiquitin-protein ligase Midline-1-like [Crassostrea virginica]
Cg14523	3.13071	0.200137	3.61238	7.33106e-51	up	Molecular Function: DNA binding (GO:0003677);; Cellular Component: nucleus (GO:0005634);;	K11138|1.5e-78|kmr:108238844|K11138 telomere-associated protein RIF1 | (RefSeq) rif1; telomere-associated protein RIF1 isoform X1	unnamed protein product [Mytilus coruscus]
Cg07473	0.608003	2.48551	-1.75865	1.62801e-08	down	--	--	uncharacterized protein LOC105320262 isoform X1 [Crassostrea gigas]
Crassostrea_gigas_newGene_4658	4.58271	1.50897	1.29894	4.4915e-07	up	--	--	uncharacterized protein LOC105321389 isoform X2 [Crassostrea gigas]
Cg25488	12.5843	56.8061	-1.64541	0.000116437	down	Cellular Component: collagen trimer (GO:0005581);;	--	short-chain collagen C4-like [Crassostrea gigas]
Cg25517	6.28573	14.2165	-1.12045	6.31099e-06	down	Molecular Function: chitin synthase activity (GO:0004100);; Cellular Component: integral component of membrane (GO:0016021);;	K00698|0.0e+00|crg:105341371|K00698 chitin synthase [EC:2.4.1.16] | (RefSeq) uncharacterized protein LOC105341371	chitin synthase chs-2 isoform X1 [Crassostrea gigas]
Crassostrea_gigas_newGene_5106	6.68614	0	5.82842	4.85218e-43	up	Molecular Function: protein binding (GO:0005515);;	K16726|2.9e-24|crg:105330604|K16726 ankyrin repeat domain-containing protein 17 | (RefSeq) uncharacterized protein LOC105330604	uncharacterized protein LOC117688541 [Crassostrea gigas]
Crassostrea_gigas_newGene_13525	0.33735	1.87049	-2.10839	5.94302e-10	down	--	--	uncharacterized protein LOC117680990 [Crassostrea gigas]
Cg00038	6.46284	2.95092	1.07096	3.36937e-11	up	--	K11997|0.0e+00|crg:109619606|K11997 tripartite motif-containing protein 2/3 | (RefSeq) uncharacterized protein LOC109619606	uncharacterized protein LOC109620628 [Crassostrea gigas]
Crassostrea_gigas_newGene_3294	5.48348	0.844501	2.11042	7.89928e-08	up	Molecular Function: zinc ion binding (GO:0008270);;	K12035|3.7e-279|crg:105342349|K12035 tripartite motif-containing protein 71 [EC:2.3.2.27] | (RefSeq) tripartite motif-containing protein 5	E3 ubiquitin-protein ligase TRIM71-like isoform X2 [Crassostrea gigas]
Cg15369	0.88352	0.161855	2.06876	4.43208e-11	up	--	K03283|6.1e-09|hst:105180952|K03283 heat shock 70kDa protein 1/2/6/8 | (RefSeq) heat shock 70 kDa protein cognate 4	heat shock 70 kDa protein 12B [Crassostrea gigas]
Crassostrea_gigas_newGene_2890	5.16534	1.35761	1.41673	0.00129491	up	--	--	uncharacterized protein LOC117691098 [Crassostrea gigas]
Cg25520	17.0592	7.11966	1.05502	0.00283293	up	--	--	uncharacterized protein LOC105329320 isoform X1 [Crassostrea gigas]
Cg30645	3.4627	1.32673	1.23978	1.18213e-05	up	--	K23222|6.8e-57|crg:105319607|K23222 nuclease HARBI1 [EC:3.1.-.-] | (RefSeq) putative nuclease HARBI1	putative nuclease HARBI1 [Crassostrea gigas]
Cg05856	7.97478	1.98883	1.82375	1.30239e-13	up	Molecular Function: protein binding (GO:0005515);; Molecular Function: methyltransferase activity (GO:0008168);; Biological Process: methylation (GO:0032259);;	K08852|1.0e-24|aplc:110986593|K08852 serine/threonine-protein kinase/endoribonuclease IRE1 [EC:2.7.11.1 3.1.26.-] | (RefSeq) uncharacterized protein LOC110986593 isoform X1	N-lysine methyltransferase KMT5A-like isoform X5 [Crassostrea gigas]
Crassostrea_gigas_newGene_724	0	4.3548	-4.37259	3.6482e-26	down	Molecular Function: transferase activity (GO:0016740);;	--	uncharacterized protein LOC117691004 [Crassostrea gigas]
Crassostrea_gigas_newGene_530	3.18698	0.335967	2.10522	5.95812e-06	up	Molecular Function: serine-type endopeptidase activity (GO:0004252);; Cellular Component: extracellular region (GO:0005576);;	--	uncharacterized protein LOC117691607 [Crassostrea gigas]
Crassostrea_gigas_newGene_15303	0.493021	1.72042	-1.41088	7.22898e-05	down	--	--	uncharacterized protein LOC109619317 [Crassostrea gigas]
Cg23375	0.607999	2.81766	-1.40392	0.00439648	down	Molecular Function: zinc ion binding (GO:0008270);;	K11997|2.2e-38|crg:105339791|K11997 tripartite motif-containing protein 2/3 | (RefSeq) tripartite motif-containing protein 2	uncharacterized protein LOC105346241 [Crassostrea gigas]
Cg30602	12.5557	2.91904	1.61878	9.14361e-05	up	Molecular Function: damaged DNA binding (GO:0003684);; Molecular Function: DNA-(apurinic or apyrimidinic site) lyase activity (GO:0003906);; Molecular Function: endonuclease activity (GO:0004519);; Biological Process: base-excision repair (GO:0006284);; Biological Process: nucleotide-excision repair (GO:0006289);; Molecular Function: zinc ion binding (GO:0008270);; Molecular Function: hydrolase a…	K10569|1.2e-290|crg:105329222|K10569 endonuclease VIII-like 3 | (RefSeq) endonuclease 8-like 3	endonuclease 8-like 3 isoform X2 [Crassostrea gigas]
Cg29278	0	18.2927	-3.3045	1.67113e-12	down	Molecular Function: lipid binding (GO:0008289);;	--	uncharacterized protein LOC105334533 isoform X4 [Crassostrea gigas]
Cg17770	0.0774068	1.74014	-2.77541	7.39211e-10	down	Cellular Component: integral component of membrane (GO:0016021);;	K17341|1.1e-45|hro:HELRODRAFT_89118|K17341 hemicentin | (RefSeq) hypothetical protein	uncharacterized protein LOC105334789 [Crassostrea gigas]
Cg08439	46.7874	21.6455	1.02598	1.93113e-06	up	Molecular Function: N-acetyltransferase activity (GO:0008080);;	--	uncharacterized protein LOC105322828 [Crassostrea gigas]
Crassostrea_gigas_newGene_14311	0.588099	4.0873	-2.18609	1.22869e-08	down	Molecular Function: nucleic acid binding (GO:0003676);;	--	uncharacterized protein LOC105344695 [Crassostrea gigas]
Crassostrea_gigas_newGene_9550	3.26702	0.695754	1.72109	1.54299e-05	up	Molecular Function: zinc ion binding (GO:0008270);;	K12021|5.0e-16|crg:105344696|K12021 tripartite motif-containing protein 45 | (RefSeq) tripartite motif-containing protein 45-like	uncharacterized protein LOC105334310 [Crassostrea gigas]
Crassostrea_gigas_newGene_10502	2.96489	9.31656	-1.4983	4.60437e-07	down	Cellular Component: integral component of membrane (GO:0016021);;	--	uncharacterized protein LOC105325065 [Crassostrea gigas]
Cg22517	0.56195	2.353	-1.57458	0.000216318	down	Molecular Function: nucleic acid binding (GO:0003676);; Biological Process: DNA integration (GO:0015074);;	K13356|1.6e-93|nvi:100117878|K13356 alcohol-forming fatty acyl-CoA reductase [EC:1.2.1.84] | (RefSeq) putative fatty acyl-CoA reductase CG5065 isoform X1	uncharacterized protein LOC117692001 [Crassostrea gigas]
Cg28159	0.611028	2.29982	-1.75871	1.26341e-10	down	Molecular Function: calcium ion binding (GO:0005509);;	K06238|1.5e-27|myi:110457477|K06238 collagen type VI alpha | (RefSeq) uncharacterized protein LOC110457477	uncharacterized protein LOC105340702 [Crassostrea gigas]
Cg04430	9.26689	19.2826	-1.07363	1.81683e-29	down	Molecular Function: transcription factor activity, sequence-specific DNA binding (GO:0003700);;	K09446|4.1e-284|crg:105317636|K09446 interferon regulatory factor 5 | (RefSeq) interferon regulatory factor 8 isoform X1	interferon regulatory factor 8 isoform X1 [Crassostrea gigas]
Cg23617	2.30962	5.47331	-1.15628	3.45701e-05	down	--	--	uncharacterized protein LOC105332452 [Crassostrea gigas]
Cg25489	9.15541	49.4062	-1.70062	0.00019128	down	--	--	short-chain collagen C4-like [Crassostrea gigas]
Cg24187	2.28062	51.2793	-2.08159	2.46006e-05	down	--	K10104|8.9e-100|crg:105322529|K10104 ficolin | (RefSeq) microfibril-associated glycoprotein 4	microfibril-associated glycoprotein 4-like [Crassostrea gigas]
Cg27771	2.17585	0.980964	1.02936	9.94152e-05	up	Molecular Function: catalytic activity (GO:0003824);; Molecular Function: molybdenum ion binding (GO:0030151);; Molecular Function: pyridoxal phosphate binding (GO:0030170);;	K15631|1.6e-25|nfu:107375543|K15631 molybdenum cofactor sulfurtransferase [EC:2.8.1.9] | (RefSeq) mocos; molybdenum cofactor sulfurase isoform X1	mitochondrial amidoxime-reducing component 1 [Crassostrea gigas]
Cg27927	8.85404	41.5752	-1.434	0.00350567	down	--	K17545|6.8e-126|crg:105343229|K17545 serine/threonine-protein kinase ULK4 [EC:2.7.11.1] | (RefSeq) serine/threonine-protein kinase ULK4-like	uncharacterized protein LOC105345065 [Crassostrea gigas]
Cg01062	0.21594	0.85302	-1.60101	4.05671e-05	down	Molecular Function: G-protein coupled receptor activity (GO:0004930);; Biological Process: cell surface receptor signaling pathway (GO:0007166);; Cellular Component: integral component of membrane (GO:0016021);;	K06776|1.1e-66|crg:105346217|K06776 receptor-type tyrosine-protein phosphatase kappa [EC:3.1.3.48] | (RefSeq) receptor-type tyrosine-protein phosphatase epsilon	adhesion G protein-coupled receptor E3-like [Crassostrea gigas]
Cg26959	17.3378	8.06074	1.03007	7.23686e-08	up	--	--	uncharacterized protein LOC105320885 isoform X1 [Crassostrea gigas]
Cg18338	2.91944	1.26361	1.03975	0.00178313	up	Molecular Function: calcium ion binding (GO:0005509);; Cellular Component: integral component of membrane (GO:0016021);;	K04988|0.0e+00|myi:110446654|K04988 polycystin 1L2 | (RefSeq) uncharacterized protein LOC110446654	polycystin-1 isoform X2 [Crassostrea gigas]
Cg29549	0.30416	7.49795	-3.80288	2.50563e-29	down	Molecular Function: calcium ion binding (GO:0005509);; Biological Process: lipid catabolic process (GO:0016042);; Molecular Function: hydrolase activity (GO:0016787);;	--	uncharacterized protein LOC105319593 [Crassostrea gigas]
Cg15525	0.106571	1.74174	-2.47058	5.27987e-08	down	Cellular Component: extracellular region (GO:0005576);; Biological Process: lipid transport (GO:0006869);; Molecular Function: lipid binding (GO:0008289);; Cellular Component: integral component of membrane (GO:0016021);; Biological Process: lipoprotein metabolic process (GO:0042157);;	K14480|4.6e-65|crg:105328675|K14480 apolipoprotein L | (RefSeq) uncharacterized protein LOC105328675	apolipoprotein L3-like [Crassostrea gigas]
Cg15239	2.60411	0.871064	1.24984	0.00190802	up	--	K06238|5.2e-60|crg:105331269|K06238 collagen type VI alpha | (RefSeq) collagen alpha-6(VI) chain	uncharacterized protein LOC105321242 [Crassostrea gigas]
Crassostrea_gigas_newGene_2992	3.28529	4.88926	-1.10708	2.14024e-05	down	Molecular Function: zinc ion binding (GO:0008270);;	K12035|1.2e-215|crg:105325102|K12035 tripartite motif-containing protein 71 [EC:2.3.2.27] | (RefSeq) uncharacterized protein LOC105325102	uncharacterized protein LOC105328406 isoform X1 [Crassostrea gigas]
Cg02912	0.52511	5.90637	-1.59283	0.0018282	down	Molecular Function: protein tyrosine phosphatase activity (GO:0004725);;	K05693|2.0e-305|crg:105331003|K05693 receptor-type tyrosine-protein phosphatase mu [EC:3.1.3.48] | (RefSeq) receptor-type tyrosine-protein phosphatase epsilon	receptor-type tyrosine-protein phosphatase alpha isoform X1 [Crassostrea gigas]
Cg23922	1.76986	5.03387	-1.4403	1.7596e-10	down	Cellular Component: integral component of membrane (GO:0016021);;	--	uncharacterized protein LOC105337250 isoform X1 [Crassostrea gigas]
Cg23010	0.396262	1.54719	-1.51653	0.000318131	down	Molecular Function: transcription cofactor activity (GO:0003712);; Biological Process: regulation of transcription from RNA polymerase II promoter (GO:0006357);; Molecular Function: metallopeptidase activity (GO:0008237);; Cellular Component: mediator complex (GO:0016592);;	K08632|2.2e-69|myi:110440275|K08632 a disintegrin and metalloproteinase with thrombospondin motifs 18 [EC:3.4.24.-] | (RefSeq) uncharacterized protein LOC110440275	A disintegrin and metalloproteinase with thrombospondin motifs 7 [Crassostrea gigas]
Cg22605	1.93382	5.02531	-1.36199	1.018e-18	down	Molecular Function: metal ion binding (GO:0046872);;	--	calponin homology domain-containing protein DDB_G0272472 [Crassostrea gigas]
Cg05880	0.795953	0.337213	1.01418	0.00744494	up	Molecular Function: nucleic acid binding (GO:0003676);; Molecular Function: zinc ion binding (GO:0008270);; Biological Process: DNA integration (GO:0015074);;	K00432|2.6e-95|spu:105437350|K00432 glutathione peroxidase [EC:1.11.1.9] | (RefSeq) glutathione peroxidase 7-like	uncharacterized protein K02A2.6-like [Crassostrea gigas]
Cg30039	8.25179	0.0420869	5.06997	1.86157e-42	up	Molecular Function: NAD+ ADP-ribosyltransferase activity (GO:0003950);; Biological Process: double-strand break repair (GO:0006302);; Biological Process: protein ADP-ribosylation (GO:0006471);;	K10798|3.8e-65|crg:105344144|K10798 poly [ADP-ribose] polymerase 2/3/4 [EC:2.4.2.30] | (RefSeq) poly [ADP-ribose] polymerase 3-like	protein mono-ADP-ribosyltransferase PARP3 [Crassostrea gigas]
Cg08532	11.3163	0.270693	2.44995	4.67654e-07	up	Cellular Component: integral component of membrane (GO:0016021);; Molecular Function: oxidoreductase activity, acting on CH-OH group of donors (GO:0016614);; Molecular Function: flavin adenine dinucleotide binding (GO:0050660);;	K23284|1.8e-91|crg:105324341|K23284 C1q-related factor | (RefSeq) collagen alpha-1(X) chain-like	complement C1q-like protein 4 [Crassostrea gigas]
Cg02860	0.494188	1.44445	-1.26186	0.0015634	down	Molecular Function: scavenger receptor activity (GO:0005044);; Biological Process: heterophilic cell-cell adhesion via plasma membrane cell adhesion molecules (GO:0007157);; Cellular Component: integral component of membrane (GO:0016021);;	K05695|3.8e-44|crg:105332268|K05695 receptor-type tyrosine-protein phosphatase F [EC:3.1.3.48] | (RefSeq) receptor-type tyrosine-protein phosphatase epsilon-like	multiple epidermal growth factor-like domains protein 10 isoform X1 [Crassostrea gigas]
Cg12783	16.4141	50.6799	-1.30698	0.00184655	down	--	--	uncharacterized protein LOC105341151 [Crassostrea gigas]
Cg29334	17.3209	5.59203	1.36511	0.000105225	up	Molecular Function: calcium ion binding (GO:0005509);;	--	sarcoplasmic calcium-binding protein isoform X1 [Crassostrea gigas]
Crassostrea_gigas_newGene_2483	1.18318	3.82424	-1.16824	0.00872438	down	Molecular Function: nucleic acid binding (GO:0003676);;	K07665|4.9e-27|api:107884559|K07665 two-component system, OmpR family, copper resistance phosphate regulon response regulator CusR | (RefSeq) uncharacterized protein LOC107884559	uncharacterized protein LOC105325029 [Crassostrea gigas]
Cg11504	8.96595	3.43208	1.25552	2.60171e-07	up	--	K10609|2.9e-24|amex:111188264|K10609 cullin 4 | (RefSeq) LOW QUALITY PROTEIN: cullin-4A-like	heat shock 70 kDa protein 12A [Crassostrea gigas]
Cg08705	16.5466	424.142	-2.45243	2.83537e-07	down	--	K23284|2.6e-72|crg:105348133|K23284 C1q-related factor | (RefSeq) complement C1q tumor necrosis factor-related protein 3	complement C1q tumor necrosis factor-related protein 3-like isoform X1 [Crassostrea gigas]
Cg15324	5.58288	2.61764	1.02564	3.44107e-09	up	Molecular Function: oxidoreductase activity, acting on the CH-OH group of donors, NAD or NADP as acceptor (GO:0016616);; Molecular Function: NAD binding (GO:0051287);;	K00049|2.7e-200|crg:105338913|K00049 glyoxylate/hydroxypyruvate reductase [EC:1.1.1.79 1.1.1.81] | (RefSeq) glyoxylate reductase/hydroxypyruvate reductase	glyoxylate reductase/hydroxypyruvate reductase [Crassostrea gigas]
Cg00205	0.852091	0.175924	1.68574	7.72925e-05	up	Molecular Function: kinase activity (GO:0016301);;	K06776|1.2e-67|crg:105346217|K06776 receptor-type tyrosine-protein phosphatase kappa [EC:3.1.3.48] | (RefSeq) receptor-type tyrosine-protein phosphatase epsilon	multiple epidermal growth factor-like domains protein 10 [Crassostrea gigas]
Crassostrea_gigas_newGene_2997	1.3211	7.57564	-1.88391	6.67141e-06	down	Molecular Function: zinc ion binding (GO:0008270);;	--	uncharacterized protein LOC117686117 [Crassostrea gigas]
Cg00959	0.922583	2.10258	-1.1095	8.47995e-05	down	Molecular Function: protein tyrosine phosphatase activity (GO:0004725);; Cellular Component: integral component of membrane (GO:0016021);;	K13297|2.2e-177|crg:105322070|K13297 receptor-type tyrosine-protein phosphatase T [EC:3.1.3.48] | (RefSeq) uncharacterized protein LOC105322070	receptor-type tyrosine-protein phosphatase alpha isoform X2 [Crassostrea gigas]
Crassostrea_gigas_newGene_9826	2.52837	7.24308	-1.21193	0.00177156	down	--	--	uncharacterized protein LOC105319869 [Crassostrea gigas]
Cg16058	2.5531	1.14456	1.02258	0.000487299	up	Molecular Function: protein tyrosine phosphatase activity (GO:0004725);; Molecular Function: protein tyrosine/serine/threonine phosphatase activity (GO:0008138);;	K14165|1.5e-92|crg:109617083|K14165 atypical dual specificity phosphatase [EC:3.1.3.16 3.1.3.48] | (RefSeq) dual specificity protein phosphatase 19-like	dual specificity protein phosphatase 19 isoform X1 [Crassostrea gigas]
Crassostrea_gigas_newGene_6990	2.57113	0	5.12969	1.29535e-37	up	--	--	uncharacterized protein LOC105321375 [Crassostrea gigas]
Cg04220	7.2499	15.3092	-1.05231	1.16143e-06	down	Cellular Component: integral component of membrane (GO:0016021);;	--	uncharacterized protein LOC105338374 [Crassostrea gigas]
Cg29866	0.480624	4.94588	-1.90904	8.38333e-05	down	--	K23284|8.6e-54|crg:105329127|K23284 C1q-related factor | (RefSeq) complement C1q tumor necrosis factor-related protein 3-like	complement C1q tumor necrosis factor-related protein 3-like [Crassostrea gigas]
Crassostrea_gigas_newGene_15113	0.351955	1.08225	-1.32354	0.000666588	down	Molecular Function: DNA binding (GO:0003677);; Biological Process: DNA recombination (GO:0006310);; Biological Process: DNA integration (GO:0015074);;	K21754|1.3e-194|crg:105323670|K21754 BTB/POZ domain-containing protein KCTD1/15 | (RefSeq) uncharacterized protein LOC105323670 isoform X1	uncharacterized protein LOC105323670 isoform X1 [Crassostrea gigas]
Cg10226	5.05855	2.38172	1.02321	2.81614e-10	up	Cellular Component: nucleus (GO:0005634);; Cellular Component: chromosome (GO:0005694);; Molecular Function: zinc ion binding (GO:0008270);; Molecular Function: histone-lysine N-methyltransferase activity (GO:0018024);;	K11433|1.1e-162|crg:105328549|K11433 [histone H3]-lysine36 N-dimethyltransferase SETMAR [EC:2.1.1.357] | (RefSeq) probable histone-lysine N-methyltransferase set-23	probable histone-lysine N-methyltransferase set-23 [Crassostrea gigas]
Crassostrea_gigas_newGene_66	2.13374	0.839766	1.19169	2.93782e-05	up	Molecular Function: nucleic acid binding (GO:0003676);; Molecular Function: zinc ion binding (GO:0008270);; Biological Process: DNA integration (GO:0015074);;	K16506|5.3e-136|adf:107335753|K16506 protocadherin Fat 1/2/3 | (RefSeq) protocadherin-like protein	uncharacterized protein K02A2.6-like [Crassostrea gigas]
Crassostrea_gigas_newGene_16454	0.390872	1.33919	-1.31072	0.0034279	down	Cellular Component: integral component of membrane (GO:0016021);;	K13297|1.2e-24|crg:105323578|K13297 receptor-type tyrosine-protein phosphatase T [EC:3.1.3.48] | (RefSeq) receptor-type tyrosine-protein phosphatase kappa-like	uncharacterized protein LOC117685671 isoform X1 [Crassostrea gigas]
[truncated: 475 more rows]
