# Supplementary material for: Integrated Application of Transcriptomics and Metabolomics Reveals the Energy Allocation-Mediated Mechanisms of Growth-Defense Trade-Offs in Crassostrea gigas and Crassostrea angulata
Source: Frontiers journal article supplement (doi:10.3389/fmars.2021.744626), 2021-10-07
Supplement: Table_2.xlsx [file Table_2.xlsx]

## Sheet: Sheet1
Table S6. Identification of significantly different metabolites (SDMs) for Crassostrea gigas (Gi) and C. angulata (An). The fold change value is obtained by dividing the average value of the Gi group by the average value of the An group.
name	Gi_Mean	An_Mean	log2FC	P-value	VIP
Xanthurenic acid	0.00742837	0.0113712	-0.614265	0.00445331	1.36823
Decanoic acid	7.9778e-07	5.33857e-06	-2.74239	0.00639136	1.25425
2-Chloro-L-phenylalanine	0.0106376	0.0131336	-0.3041	0.00232623	1.33606
Inosine	0.000271356	0.000120741	1.16827	0.000882692	1.49351
Adenosine 5'-monophosphate disodium salt	0.00589841	0.00934097	-0.663248	0.00429961	1.33818
Lauroyl-L-carnitine	0.000116649	0.000170592	-0.548378	0.00881684	1.281
Palmitoyl-DL-carnitine chloride	0.00248953	0.00402993	-0.694883	0.00329144	1.41842
Nateglinide	0.000854825	0.000542202	0.656799	0.00131468	1.42152
Succinic acid	9.16563e-06	1.38531e-05	-0.595902	0.00642814	1.3246
Dioctyl Phthalate	1.10618e-05	1.92106e-05	-0.796319	0.00278321	1.35106
Guanosine 5'-monophosphate disodium salt hydrate	0.00036649	0.000616014	-0.749189	0.000938563	1.49179
Lumichrome	4.56083e-06	5.69781e-06	-0.321111	0.0348818	1.02401
all cis-(6,9,12)-Linolenic acid	0.000421652	0.000604584	-0.519891	0.0420306	1.08293
L-Aspartyl-L-phenylalanine	6.79818e-06	1.20436e-05	-0.825046	0.0122634	1.2399
Docosadienoate (22:2n6)	0.000117193	0.000178922	-0.610439	0.0152676	1.19693
(3beta,22E,24R)-Ergosta-4,6,8(14),22-tetraen-3-ol	0.000207307	0.000300335	-0.5348	0.01229	1.22978
Ginsenoyne J	4.61785e-05	5.98951e-05	-0.375215	0.00166201	1.38938
Capsidiol	0.000249601	0.000304187	-0.285336	0.00143517	1.37861
Tetradec-2-enal	6.55854e-05	9.06052e-05	-0.46622	0.00394062	1.28018
4-Hydroxynonenal	2.42333e-06	1.01486e-06	1.25571	0.00296623	1.45691
(-)-Valeranone	3.77532e-05	4.92688e-05	-0.384076	2.91893e-05	1.66837
Tanacetol A	7.75322e-05	0.00013342	-0.783108	0.0252458	1.08173
3a,21-Dihydroxy-5b-pregnane-11,20-dione	6.20991e-05	0.000192164	-1.62969	0.00159404	1.42077
3,4,5,6-Tetrahydrohippuric acid	0.000175295	0.000226253	-0.368153	0.0424551	1.04631
2,7,10-Bisabolatriene	1.56998e-06	3.41373e-06	-1.12061	0.00399484	1.39186
2,6-Di-tert-butylbenzoquinone	1.03127e-05	1.24306e-05	-0.269482	0.00213017	1.33323
(E)-Casimiroedine	1.21838e-05	2.179e-05	-0.838707	0.0400995	1.01087
Docosahexaenoyl Ethanolamide	1.63843e-05	2.1861e-05	-0.416046	0.0259306	1.15274
5-Carboxy-2'-deoxyuridine	1.72082e-06	4.28776e-06	-1.31712	0.0127942	1.20981
Cycloartocarpin	6.35414e-05	4.19393e-05	0.599395	0.0246509	1.08475
Misoprostol	2.94787e-05	4.51512e-05	-0.615092	0.00546287	1.36432
Methyl stearate	4.03389e-05	5.33625e-05	-0.403652	0.00153378	1.40232
Lysyl-Glutamate	4.07064e-05	2.52946e-05	0.686424	0.00044845	1.46086
4-Hydroxystyrene	1.39645e-06	2.36171e-06	-0.758072	0.00502242	1.31613
Cyclododecanone	3.82564e-06	6.03186e-06	-0.656901	0.0205363	1.05427
(Z)-3-Oxo-2-(2-pentenyl)-1-cyclopenteneacetic acid	7.77746e-06	6.32039e-06	0.299286	0.0407909	1.04587
1,1-Dimethoxy-trans-2-hexene	1.34681e-05	6.10503e-06	1.14148	0.00591587	1.33921
(E)-10,11-Dihydro-alpha-atlantone	7.57933e-06	9.35467e-06	-0.303616	0.00352273	1.24469
3-Methylbutyl 3-oxobutanoate	2.04274e-05	3.59037e-05	-0.813627	0.00159254	1.43124
Caffeoyl tyrosine	1.78284e-05	1.11541e-05	0.676603	0.0216358	1.10271
N-Acetylmuramoyl-Ala	0.000155796	7.56776e-05	1.04172	0.0205515	1.26726
Glaudine	8.97185e-06	2.51568e-06	1.83446	4.36932e-05	1.73078
Morphiceptin	1.42175e-05	2.79949e-05	-0.977498	0.00310111	1.3555
Pyridine N-oxide glucuronide	5.1927e-06	1.26887e-06	2.03294	0.00491101	1.4171
(6alpha,22E)-6-Hydroxy-4,7,22-ergostatrien-3-one	0.000164393	0.000249631	-0.602647	0.0141391	1.20206
3-Methylglutaconic acid	1.66344e-05	2.39053e-05	-0.523156	0.000316568	1.56744
Isopersin	0.000569268	0.000870577	-0.612863	0.00684769	1.28503
Naematolone	4.6558e-05	7.41287e-05	-0.671002	0.0234738	1.09287
(3a,5b)-24-oxo-24-[(2-sulfoethyl)amino]cholan-3-yl-b-D-Glucopyranosiduronic acid	2.37991e-05	3.85417e-05	-0.695509	0.0320416	1.04447
(1beta,4E,8beta,10alpha)-1,10-Epoxy-4,11(13)-germacradien-12,8-olide	4.29223e-06	5.97166e-06	-0.476403	0.0280909	1.09219
4'-Hydroxy-R-phenprocoumon	2.51243e-05	4.49818e-05	-0.840256	0.00454345	1.31761
N-Desmethylvenlafaxine	5.39802e-06	1.17471e-05	-1.12181	0.000216907	1.74093
6-Hydroxymelatonin glucuronide	1.17894e-05	3.96069e-06	1.57367	0.00714444	1.38505
(3b,20R,22R)-3,20,27-Trihydroxy-1-oxowitha-5,24-dienolide 3-glucoside	1.35594e-05	2.01566e-05	-0.571962	0.00790723	1.2712
2,8-Dihydroxyquinoline-beta-D-glucuronide	2.00972e-06	4.66933e-06	-1.21622	0.000253281	1.60662
Arabinopyranobiose	9.30785e-07	2.47471e-06	-1.41074	0.00962101	1.28975
Cinncassiol C1 19-glucoside	1.74488e-05	4.6549e-05	-1.41562	0.00198345	1.54081
1-Arachidonoylglycerophosphoinositol	3.42933e-05	5.55843e-05	-0.696751	0.000929678	1.35951
3-Hydroxyhexadecadienoylcarnitine	7.80397e-06	1.40345e-05	-0.846696	0.00026442	1.56324
Prostaglandin E1	6.93034e-05	0.000100491	-0.536063	0.0292698	1.12792
Perillyl aldehyde	5.58675e-06	7.93841e-06	-0.506842	0.0280098	1.0555
2-Methyl-1-phenyl-2-propanyl acetate	1.92367e-05	3.08273e-05	-0.680341	0.00585292	1.29996
Pentoxifylline	2.61194e-06	6.76873e-06	-1.37376	0.012433	1.2
8-Methoxykynurenate	7.12085e-06	1.10789e-05	-0.637692	0.0116323	1.21263
Glabrin D	2.2969e-06	6.62237e-06	-1.52766	0.000608568	1.62838
L-prolyl-L-proline	4.2031e-05	5.81148e-05	-0.467452	0.0018379	1.45415
Pimelylcarnitine	8.69278e-06	1.368e-05	-0.654181	0.00263486	1.38261
Hydroxyhexamide	1.22913e-05	1.58204e-05	-0.364144	0.0135215	1.1287
Arginyl-Cysteine	8.71878e-06	1.72789e-05	-0.986815	0.00190558	1.44953
N-Deisopropyl-fluvastatin	9.9044e-06	1.71706e-05	-0.793796	0.000194466	1.56222
Kamahine C	7.10628e-06	5.35713e-06	0.407634	0.0420273	1.01054
2(R)-hydroxydocosanoic acid	7.07824e-05	0.000141291	-0.997212	0.0137495	1.2163
Threoninyl-Tryptophan	6.78936e-06	1.10322e-05	-0.700374	0.00583952	1.36761
Gamma-Tocotrienol	0.00030375	0.000442528	-0.542884	0.014851	1.2049
Setariol	0.00029306	0.000424786	-0.53554	0.0338415	1.11046
Dihydrowyerol	4.395e-05	1.59124e-05	1.46572	3.09134e-06	1.84476
cis-3-Hexenyl pyruvate	5.52563e-06	8.68064e-06	-0.651661	0.014652	1.18966
Alpha-Linolenic acid	0.000170467	0.00029245	-0.778697	0.00479075	1.37436
Sinapoylputrescine	3.03373e-06	5.87304e-06	-0.953014	0.0294542	1.10688
Isokobusone	5.48122e-06	8.33071e-06	-0.603942	0.001029	1.50355
Crispane	2.49684e-05	3.12875e-05	-0.325485	0.0317351	1.04605
Mozambioside	1.03639e-05	1.65105e-05	-0.671823	0.0141847	1.22903
Rubraflavone A	9.77394e-06	1.71329e-05	-0.809755	0.000485537	1.48279
Gamma-Aminobutyric acid	1.16331e-05	6.43519e-06	0.854176	0.00488463	1.37818
Cinitapride	9.63616e-05	0.000130021	-0.432214	0.0262414	1.03788
Androstenedione	4.76976e-06	7.50325e-06	-0.653599	0.0100855	1.26082
(3beta,5alpha,9alpha,22E,24R)-5,9-Epidioxy-3-hydroxyergosta-7,22-dien-6-one	0.000170765	0.000222088	-0.379118	0.0251704	1.11322
Ivacaftor	5.16082e-06	2.08969e-05	-2.01762	4.58096e-05	1.63267
Cotinine methonium ion	1.49966e-05	3.28111e-05	-1.12955	0.00801023	1.36466
Anatabine	8.13016e-08	3.23551e-07	-1.99264	0.00827947	1.33852
Isolinderenolide	1.96969e-05	3.10606e-05	-0.657121	0.00964191	1.31562
Flavoxate	0.000104718	5.73617e-05	0.868351	0.0297027	1.04772
24-Oxo-1alpha,23,25-trihydroxyvitamin D3	0.00302493	0.00486282	-0.684892	0.00633023	1.35336
2-Phenyl-1,3-dioxolane-4-methanol	4.41459e-06	8.58555e-06	-0.959631	0.044635	1.07411
3 alpha,7 alpha,26-Trihydroxy-5beta-cholestane	2.05232e-05	2.81062e-05	-0.453637	0.0423452	1.08115
1-(11Z-docosenoyl)-glycero-3-phosphate	1.32223e-05	1.90148e-05	-0.524152	0.0102698	1.20327
Kamolonol	8.00386e-05	0.00016459	-1.04011	0.015422	1.17285
Trifluridine	7.93744e-07	8.77882e-08	3.17657	0.0255399	1.18879
9-Acetoxyfukinanolide	1.30034e-05	1.72561e-05	-0.408215	0.041469	1.09003
Corchorifatty acid F	9.8769e-06	1.68886e-05	-0.77392	0.0164208	1.14295
Arginyl-Proline	1.09806e-06	1.8098e-06	-0.720879	0.00138655	1.36903
Tridecanoic acid	0.000146469	0.000234495	-0.678959	0.000286496	1.56484
PE(14:1(9Z)/22:4(7Z,10Z,13Z,16Z))	8.57324e-05	0.000130174	-0.602526	0.00289762	1.46631
Agavoside A	3.44739e-05	5.76426e-05	-0.741629	0.00347024	1.49179
Sphinganine	0.000571326	0.000825285	-0.530578	0.00409418	1.32937
PC(18:2(9Z,12Z)/18:3(6Z,9Z,12Z))	0.000464475	0.000661983	-0.511192	0.000107549	1.60194
(R)-3-Hydroxy-Octadecanoic acid	0.00372796	0.00529496	-0.506232	0.0231355	1.05862
Hydroxyphenylacetylglycine	6.84596e-06	1.50744e-05	-1.13878	0.00265585	1.38897
Alitame	2.33095e-05	4.78906e-05	-1.03883	0.0432734	1.06784
24-Oxo-1alpha,25-dihydroxyvitamin D3	0.000159759	0.00023344	-0.54715	0.00581277	1.29142
4-Hydroxyretinoic acid	7.18526e-05	0.000109372	-0.606128	0.0109913	1.14841
12-hydroxyicosanoic acid	0.000829948	0.00121739	-0.552703	0.0150941	1.12366
1-Hydroxy-1-phenyl-3-octadecanone	5.0367e-05	7.13386e-05	-0.502206	0.000202117	1.54961
10,20-Dihydroxyeicosanoic acid	0.00094907	0.00135864	-0.517574	0.0231158	1.05949
N-Acetyl-glucosamine 1-phosphate	3.8622e-06	6.53217e-06	-0.758139	0.000144255	1.68807
Cholesta-4,6-dien-3-one	0.000117168	0.000183548	-0.647584	0.0145843	1.21202
Ethyl N-methylanthranilate	0.000588247	0.000747772	-0.346176	0.00154253	1.44211
(Z)-10-Hydroxy-8-decene-4,6-diynoic acid	2.11578e-05	3.31123e-05	-0.646179	0.0367428	1.03854
15(S)-HETE	6.97163e-05	0.000131213	-0.912343	0.0118316	1.2639
Ethyl 4-pentenoate	2.56256e-06	3.723e-06	-0.538877	0.0173142	1.22397
5-(2-Methylpropyl)tetrahydro-2-oxo-3-furancarboxylic acid	2.00784e-06	2.90066e-06	-0.530735	0.0278168	1.13054
Isoleucyl-Methionine	3.76663e-06	8.29165e-06	-1.13839	0.011621	1.23706
(S)-Spinacine	3.08993e-05	4.32439e-05	-0.484923	0.0270299	1.22493
Pandamarilactone 32	0.000151103	0.000232532	-0.621898	0.00025598	1.56107
Citranaxanthin	0.000167973	0.00022807	-0.441246	0.0269586	1.08445
Synephrine acetonide	0.000162783	0.00022275	-0.452476	0.00278855	1.43538
Xanthotoxol glucoside	2.40395e-05	4.15224e-05	-0.78848	0.00719363	1.21076
13-Hydroxy-9-methoxy-10-oxo-11-octadecenoic acid	8.76847e-06	1.39987e-05	-0.674898	0.0345491	1.03453
Phenethylamine glucuronide	1.84957e-06	4.5956e-06	-1.31306	0.00238162	1.39637
Prednicarbate	0.00136769	0.000491531	1.47639	9.66026e-05	1.65599
1-(2,4,6-Trimethoxyphenyl)-1,3-butanedione	1.84973e-05	2.93936e-05	-0.668185	0.0252889	1.19604
Erythroskyrin	6.74557e-05	2.5036e-05	1.42994	0.00125163	1.43477
9-peroxy-5Z,7E,11Z,14Z-eicosatetraenoate	0.00013293	0.000188691	-0.505354	0.0150061	1.22311
Isofucosterol 3-O-[6-O-Octadecanoyl-b-D-glucopyranoside]	1.88337e-05	3.66838e-05	-0.961825	0.00251185	1.38919
Ercalcitriol	0.000119077	0.000178437	-0.583525	0.0152957	1.20236
Tafluprost	5.43165e-05	6.9166e-05	-0.348671	0.0396697	1.00439
5-Methylthioribose 1-phosphate	7.01888e-06	1.00885e-05	-0.523401	0.00501799	1.258
Thaumatin b, recombinant	1.61124e-05	2.00499e-05	-0.315422	0.0098388	1.19582
13'-Hydroxy-gamma-tocotrienol	0.000649551	0.000884925	-0.446113	0.0255601	1.1385
Gemfibrozil	2.07764e-05	7.72914e-06	1.42656	0.000885223	1.49273
4-Trimethylammoniobutanoic acid	0.000841878	0.0016004	-0.926748	0.0015175	1.54149
Pubesenolide	0.000803287	0.00120613	-0.586393	0.0212644	1.13802
Phthalic acid	6.81685e-06	8.39153e-06	-0.299828	0.0246858	1.08692
Tetrahydrofurfuryl cinnamate	3.76546e-06	5.46819e-06	-0.538237	0.00693584	1.30386
Jasmonic acid	1.67275e-07	1.84582e-06	-3.46397	0.000562688	1.54859
2-Heptyl-4,5-dimethylthiazole	9.76349e-06	1.41911e-05	-0.539514	0.00452879	1.33131
Procurcumadiol	7.10221e-06	1.23251e-05	-0.795256	0.000497452	1.53382
LysoPC(22:5(7Z,10Z,13Z,16Z,19Z))	0.000272085	0.00047155	-0.793352	0.00495191	1.38902
Petasitenine	2.26992e-06	5.08085e-06	-1.16243	0.0214983	1.19296
(2beta,3alpha,9alpha,24R)-Ergosta-7,22-diene-2,3,9-triol	0.000312304	0.000470606	-0.591569	0.0174477	1.20861
3-O-cis-Coumaroylmaslinic acid	0.000217828	0.000368726	-0.759359	0.000773255	1.50355
14,15-DiHETE	1.64959e-05	1.06271e-05	0.634356	0.0140604	1.14972
Gibberellin A110	0.000110081	0.000160958	-0.548123	0.0233036	1.09076
Pseudoecgonine	5.06217e-06	7.62724e-06	-0.591405	0.00573383	1.33508
Dihydrodeoxy-8-epiaustdiol	6.17224e-06	7.95532e-06	-0.366126	0.0424697	1.06289
PC(16:1(9Z)/22:1(13Z))	3.08679e-05	4.98744e-05	-0.692191	0.00369617	1.3635
(S)-Reticuline	7.34548e-05	3.09733e-05	1.24583	0.0052585	1.35609
7a,12a-Dihydroxy-5a-cholestan-3-one	4.77538e-05	6.80441e-05	-0.510856	0.0182637	1.19615
Moschamindole	4.19291e-06	6.08478e-06	-0.537253	0.0273758	1.16291
Diisopentyl thiomalate	7.52962e-06	1.08924e-05	-0.532669	0.0281047	1.16381
1-tetradecanoyl-sn-glycero-3-phosphate	1.47163e-05	2.27665e-05	-0.629497	0.0136352	1.22479
erythro-6,8-Heneicosanediol	6.026e-05	9.5974e-05	-0.671442	0.0076849	1.25846
3'-N-Acetyl-4'-O-(9-octadecenoyl)fusarochromanone	8.30553e-05	9.60981e-05	-0.210437	0.039155	1.07995
Histidinyl-Gamma-glutamate	5.02237e-05	9.747e-05	-0.956589	0.000597165	1.55201
Cinncassiol C3	6.24573e-05	8.32454e-05	-0.414502	0.0229211	1.05762
Ptelatoside B	7.68688e-05	4.09508e-05	0.908508	0.0108581	1.21494
Dextrorphan O-glucuronide	6.05629e-06	1.95013e-05	-1.68706	0.000149328	1.7165
NNAL-N-glucuronide	1.94789e-06	3.51252e-06	-0.850595	0.0208433	1.16575
4-carboxy-5-cholesta-8,24-dien-3-ol	1.05746e-06	3.48641e-06	-1.72113	0.0011571	1.50626
Miliacin	3.60064e-06	5.7265e-06	-0.669401	0.0438462	1.07544
2-(3-Carboxy-3-aminopropyl)-L-histidine	7.32222e-06	3.75546e-06	0.963291	0.00444685	1.35684
repaglinide aromatic amine	1.324e-06	2.95795e-06	-1.15969	0.022051	1.18488
Dide-O-methyl-4-O-alpha-D-glucopyranosylsimmondsin	0.000107234	0.000155316	-0.534449	0.00237888	1.38057
(S)-3-Mercaptohexyl acetate	4.29846e-05	2.98019e-05	0.528416	0.0107012	1.17763
Coprocholic acid	8.29286e-05	0.000102907	-0.311399	0.0301933	1.12096
Myo-inositol 1-phosphate	2.61959e-06	3.66573e-06	-0.484762	0.0102508	1.30465
Nicotinate D-ribonucleoside	8.55493e-06	5.13459e-06	0.736507	0.0160948	1.22395
5-amino-1-(5-phosphonato-D-ribosyl)imidazol-3-ium	4.9867e-06	1.01739e-05	-1.02872	0.00355828	1.43847
Octyl gallate	4.4124e-06	1.1736e-05	-1.4113	0.0209956	1.03977
Glutamyl-Asparagine	1.0127e-06	2.68123e-06	-1.40468	0.000476128	1.57436
8,11,14-Eicosatrienoic acid	1.54766e-05	2.11003e-05	-0.447175	0.0345191	1.06962
Saponin D	6.63996e-06	1.60462e-05	-1.27299	0.000847523	1.65614
N2-(gamma-Glutamyl)-4-carboxyphenylhydrazine	4.38645e-05	1.97164e-05	1.15366	0.000532966	1.53505
N-isopropylterephthalamic acid	1.16809e-05	1.72742e-05	-0.564468	0.000408071	1.57856
Cucurbitacin B	0.000177154	0.000232858	-0.394446	0.0299818	1.22626
Cytokinin B	1.28705e-05	6.43939e-06	0.999078	0.000145294	1.53375
Leukotriene C5	0.00174326	0.000919189	0.923352	0.00748837	1.30949
Natamycin	1.80897e-06	4.48904e-06	-1.31124	0.000829232	1.54475
LysoPC(24:1(15Z))	3.67073e-06	7.2384e-06	-0.979603	0.0244637	1.14591
Thymidine	1.67514e-05	9.81271e-06	0.771559	0.0237272	1.21033
(3S,7E,9R)-4,7-Megastigmadiene-3,9-diol 9-[apiosyl-(1->6)-glucoside]	0.000165602	6.75667e-05	1.29334	0.00025242	1.64063
4-Hydroxybenzyl isothiocyanate rhamnoside	1.28698e-05	3.18738e-05	-1.30838	0.0126196	1.24868
2,4-Dihydroxy-6,7-dimethoxy-2H-1,4-benzoxazin-3(4H)-one	2.33082e-06	4.04187e-06	-0.794184	0.0010901	1.54761
N2-Succinyl-L-glutamic acid 5-semialdehyde	0.000306465	0.000548734	-0.840387	0.0251092	1.09388
L-Cysteine	3.12401e-05	1.34703e-05	1.21362	0.00064667	1.46356
Vomifoliol 9-[glucosyl-(1->4)-xylosyl-(1->6)-glucoside]	5.56039e-06	3.02551e-05	-2.44392	0.000317263	1.69905
Bilirubin	8.90811e-07	6.03788e-06	-2.76085	0.00143298	1.58204
Junosmarin	0.000649852	0.000118893	2.45045	0.0022832	1.52015
Anandamide	2.44175e-05	3.58977e-05	-0.555977	0.00996511	1.2861
2-Hydroxyadipic acid	5.42504e-05	6.77539e-05	-0.32067	0.000419516	1.50364
Prehumulinic acid	1.28447e-05	1.7916e-05	-0.480081	0.0129985	1.22905
Eicosapentaenoyl Ethanolamide	0.000150306	0.00021472	-0.514558	0.0244165	1.17042
Allivicin	3.52137e-06	1.13233e-05	-1.68508	0.00405933	1.35188
xi-5-Hydroxydodecanoic acid	3.45836e-05	4.40367e-05	-0.348619	0.0147676	1.0193
LysoPE(0:0/18:1(11Z))	0.000572525	0.000423105	0.436323	0.0120612	1.20487
Arenaine	1.27934e-05	1.71407e-05	-0.422021	0.0283972	1.08758
LysoPC(18:1(9Z))	3.62545e-06	6.06205e-06	-0.741644	0.0322395	1.11161
Cis-zeatin-9-N-glucoside	2.95325e-05	4.25279e-05	-0.526107	0.0247678	1.21243
Phenylmethylglycidic ester	3.02755e-05	3.93259e-05	-0.377329	0.0428202	1.14616
5,6-Dihydro-4-methoxy-6-[2-(4-methoxyphenyl)ethyl]-2H-pyran-2-one	0.000178544	6.31914e-05	1.49848	0.00411145	1.45197
MG(15:0/0:0/0:0)	5.5034e-05	8.17336e-05	-0.570606	0.0231395	1.05201
N-Acetyl-S-(N-methylcarbamoyl)cysteine	3.38937e-06	4.99043e-07	2.76378	0.0270085	1.09946
Kanzonol F	0.000242391	0.000173368	0.483496	0.0138559	1.13523
Crithmumdiol	5.89892e-06	9.14565e-06	-0.632634	0.00566595	1.42097
Cafamarine	2.64571e-06	0	#DIV/0!	0.00145829	1.4971
Ganglioside GA2 (d18:1/20:0)	5.27203e-06	1.14956e-05	-1.12466	0.00130135	1.46844
3b,18b-3-Methoxy-11-oxo-12-oleanen-30-oic acid	7.3919e-07	1.73455e-06	-1.23054	0.0175114	1.15739
Cysteinyl-Histidine	3.45827e-05	4.50378e-05	-0.381084	0.000995885	1.43067
4a-Hydroxytetrahydrobiopterin	2.11001e-05	1.59123e-05	0.407108	0.0163982	1.01514
Gemifloxacin	0.000169341	8.09819e-05	1.06426	0.0151655	1.16487
Droperidol	3.89445e-06	5.70048e-06	-0.549664	0.031585	1.07179
IDP	4.40196e-06	1.16616e-05	-1.40555	0.00108387	1.5469
Vaporole	2.00728e-05	2.44688e-05	-0.285703	0.0140926	1.10876
Goyaglycoside a	9.44393e-05	0.000126561	-0.422377	0.00306137	1.37652
Calamin	5.98397e-05	1.88355e-05	1.66765	0.000251067	1.57589
Clausarinol	0.00599262	0.00760991	-0.344694	0.0120266	1.22704
Jasmolone	1.70569e-05	3.19163e-05	-0.903935	0.0158062	1.16769
7a-Hydroxytestosterone	5.40759e-06	7.3834e-06	-0.449299	0.00666526	1.29432
(5alpha,6beta,14alpha,20R,22R)-5,6,14,20,27-Pentahydroxy-1-oxowith-24-enolide	0.000176497	0.000299367	-0.762267	0.0118712	1.38358
Vignatic acid B	5.73024e-05	9.68014e-05	-0.756431	0.00400038	1.53934
3',4'-Dihydrodiol	3.23668e-06	6.64542e-06	-1.03784	0.0106344	1.28225
Testosterone	2.52099e-05	3.60466e-05	-0.515872	0.0252698	1.14963
Frangulanine	0.000652846	0.000809843	-0.310901	0.0323508	1.16964
Asperagenin	0.000494307	0.000731323	-0.565103	0.00699659	1.34009
Isomultiflorenyl acetate	7.11912e-06	1.20641e-05	-0.760948	0.0028888	1.26112
Glucosylceramide (d18:1/12:0)	9.69964e-05	0.000153904	-0.666028	0.00117246	1.5324
Peonidin 3-(6''-malonyl-glucoside)	1.31239e-07	1.08592e-05	-6.37058	0.0166973	1.19132
Ribavirin	3.17019e-07	1.48861e-06	-2.23132	0.000925742	1.60159
Pubescenol	3.16659e-05	4.30238e-05	-0.442204	0.0303251	1.10825
Quinquenoside III	1.45543e-05	3.03506e-05	-1.06028	0.00967548	1.29186
2,4-Diamino-6,7-dimethoxyquinazoline	1.27951e-05	2.00818e-05	-0.650293	0.00185591	1.44496
Methylgingerol	8.20416e-05	0.000119409	-0.54148	0.0120528	1.22418
Flavin Mononucleotide	1.111e-05	1.68073e-05	-0.597228	0.00498569	1.25131
Xanthosine	2.50627e-06	5.53095e-06	-1.14199	0.000196878	1.64513
Actinidic acid	0.000321962	0.000572274	-0.829818	0.00619069	1.32675
(2R,6x)-7-Methyl-3-methylene-1,2,6,7-octanetetrol 2-glucoside	5.71834e-05	8.07351e-05	-0.4976	0.0212355	1.11016
6-Methoxy-2(3H)-benzoxazolone	9.68209e-07	1.84036e-06	-0.926597	0.00111182	1.55995
Doxycycline	2.00328e-05	7.06806e-06	1.50298	0.0474553	1.03971
Physagulin E	4.12346e-06	8.5849e-06	-1.05795	0.000692113	1.52559
Homophytanic acid	7.45391e-06	1.22468e-05	-0.716334	0.00132959	1.47239
5-Ethyl-3-hydroxy-4-methyl-2(5H)-furanone	1.55267e-05	2.17461e-05	-0.486012	0.0217398	1.20228
N-desmethylalmotriptan	1.53336e-05	2.22858e-05	-0.539427	0.0101001	1.1924
Calcitroic acid	0.000150611	0.000393336	-1.38493	0.000541467	1.50902
Enoxacin	3.80828e-05	3.3035e-05	0.205144	0.0214116	1.02398
(2b,3b)-Dihydroxy-30-nor-12,20(29)-oleanadiene-28-glucopyranosyloxy-23-oic acid 3-glucuronide	6.50609e-07	3.49291e-06	-2.42457	0.0425589	1.07846
Lubiprostone	1.08059e-05	4.12708e-06	1.38862	0.00859697	1.26989
N,N'-diacetylchitobiose	5.2102e-06	2.12036e-07	4.61896	0.0224179	1.10932
Dicyclomine	2.84853e-05	3.53011e-05	-0.309494	0.0014056	1.40419
3-Epipapyriferic acid	0.000327574	0.000603818	-0.882295	0.00185128	1.39896
13-Demethylspirolide C	6.37669e-05	8.38001e-05	-0.394145	0.00434399	1.28593
Cinncassiol D2 glucoside	6.62036e-05	2.95613e-05	1.1632	0.00514558	1.31828
2-O-alpha-D-Galactopyranosyl-1-deoxynojirimycin	5.98388e-06	1.61949e-06	1.88554	0.0203134	1.15133
Glycyl-Glutamate	6.9009e-06	8.86754e-06	-0.361749	0.0137672	1.17106
Glucosylsphingosine	0.000381244	0.000602613	-0.660516	0.00912821	1.29553
4-Hydroxymethylpyrazole	1.11904e-06	0	#DIV/0!	0.0156048	1.20513
Pindolol	5.41696e-06	9.72118e-06	-0.843648	0.00234605	1.47926
(R)-2-Hydroxy-7,8-dimethoxy-2H-1,4-benzoxazin-3(4H)-one 2-glucoside	3.64119e-06	6.64234e-06	-0.867281	0.0037259	1.39282
Antibiotic X 14889C	1.10955e-06	4.86111e-06	-2.13131	0.00170733	1.48448
28-Homobrassinolide	0.00137649	0.00180515	-0.391132	0.0170295	1.18099
18-Dehydroursolic acid 3-arabinoside	2.14895e-06	5.62246e-06	-1.38757	0.000584043	1.5929
25-Acetyl-6,7-didehydrofevicordin F 3-glucoside	2.47162e-05	3.74106e-05	-0.597989	0.000449889	1.41599
N-(2,4-Eicosadienoyl)piperidine	7.88292e-06	1.21864e-05	-0.628472	0.0384605	1.05569
(3beta,5alpha,9alpha,22E,24R)-3,5,9-Trihydroxy-23-methylergosta-7,22-dien-6-one	3.51346e-05	4.89743e-05	-0.479132	0.00898796	1.22393
LysoPE(0:0/22:5(4Z,7Z,10Z,13Z,16Z))	5.21744e-06	1.15825e-05	-1.15054	0.0112916	1.21863
28-Glucosyloleanolic acid 3-arabinoside	1.13777e-05	6.81193e-07	4.06201	0.0015946	1.48105
Homoarecoline	8.8304e-05	0.000119424	-0.435544	0.0019977	1.51444
(R)-Roemerine	7.64179e-06	1.17319e-05	-0.618449	0.0246339	1.05157
Benazepril	9.97466e-06	2.37183e-05	-1.24966	0.000644292	1.68846
Shyobunyl acetate	0.000101608	0.000145408	-0.517097	0.0453545	1.03559
Everolimus	6.3296e-05	0.000104875	-0.728487	0.00404995	1.37941
Buprenorphine glucuronide	0.00012374	5.67818e-05	1.12381	0.0101838	1.28673
Cefprozil	2.34027e-07	2.72712e-06	-3.54263	0.00782123	1.29951
Lisinopril	6.14342e-06	1.08033e-05	-0.814355	0.0239052	1.16707
Margaroylglycine	1.01739e-05	1.62411e-05	-0.674776	0.00105716	1.49682
7a,12a-Dihydroxy-cholestene-3-one	0.00015565	0.000218808	-0.491361	0.0100531	1.22038
Saxagliptin	6.19521e-05	9.13536e-05	-0.56031	0.0380195	1.07323
Hovenidulcigenin B	0.000193609	0.000262505	-0.439197	0.0355064	1.22293
(1(10)E,4E,6a,8b)-8-Angeloyloxy-14-oxo-1(10),4,11(13)-germacratrien-12,6-olide	9.04136e-05	0.000167662	-0.89094	0.000653383	1.53057
Gossyvertin	1.63135e-07	3.11766e-06	-4.25632	0.0126383	1.2227
7,9-Dimethyluric acid	4.71572e-06	7.88468e-06	-0.741574	0.00104355	1.38058
4-O-beta-D-Glucopyranuronosyl-L-fucose	2.03199e-06	2.1122e-05	-3.37778	0.000934411	1.61432
beta-D-Glucosyloxydestruxin B	1.67681e-07	4.86795e-06	-4.85953	0.00601684	1.43367
22-Deoxoisocucurbitacin D	0.000152334	0.00024191	-0.667228	0.0150767	1.21938
Ganoderenic acid C	0.000628349	0.00131923	-1.07006	0.00271039	1.45248
Erythritol	1.26801e-06	1.91847e-06	-0.597387	0.0355563	1.03086
Ophthalmic acid	3.17752e-06	6.08948e-06	-0.938417	0.00181079	1.44925
PC-M6	3.04336e-05	5.12662e-05	-0.752342	0.014126	1.20455
Lotaustralin	0.000104036	3.65416e-05	1.50947	0.00130368	1.46888
DG(14:1(9Z)/22:6(4Z,7Z,10Z,13Z,16Z,19Z)/0:0)	0.000136664	0.00021331	-0.642321	0.00963726	1.245
4-cholesten-7,12,24-triol-3-one	5.88852e-05	9.3015e-05	-0.659558	0.0102433	1.2452
2-Hydroxyestrone	9.46727e-06	1.30307e-05	-0.460895	0.00140952	1.41936
Androstanedione	7.26326e-06	1.14457e-05	-0.656116	0.0104642	1.22792
Imidazole-4-acetaldehyde	1.75433e-06	1.52206e-07	3.52682	0.00350063	1.50051
(12S,15S)-15-O-Demethyl-10,29-dideoxy-11,12-dihydro-striatin C	1.30024e-05	2.22906e-05	-0.777658	0.000174336	1.60608
10-alpha-methoxy-9,10-dihydrolysergol	3.41763e-07	2.09546e-06	-2.6162	0.00679507	1.22615
trans-Caffeic acid [apiosyl-(1->6)-glucosyl] ester	1.89325e-06	6.438e-06	-1.76575	0.0224791	1.19837
(R)-Pronuciferine	1.09859e-05	2.07649e-05	-0.918501	0.000315041	1.62784
Cascarillone	3.1011e-06	4.15525e-06	-0.422155	0.00808194	1.19095
(17alpha,23S)-17,23-Epoxy-29-hydroxy-27-norlanosta-1,8-diene-3,15,24-trione	6.99232e-05	9.38728e-05	-0.424937	0.00585203	1.30838
Isonuatigenin 3-[rhamnosyl-(1->2)-glucoside]	1.86398e-06	2.02335e-05	-3.44029	0.0163403	1.17847
Hydralazine acetone hydrazone	3.7624e-07	1.14054e-06	-1.59999	0.00128133	1.53874
2-Amino-3,4-dimethylimidazo[4,5-f]quinoline	4.87986e-06	9.26851e-06	-0.925497	0.000107191	1.66302
Aminofurantoin	1.04721e-05	1.5907e-05	-0.603113	0.00542234	1.32708
Glutamyl-Tyrosine	2.39525e-06	6.80494e-06	-1.5064	0.000109054	1.69344
Janthitrem E	1.17343e-05	3.26321e-05	-1.47557	0.00304594	1.5452
Tragopogonsaponin A	4.71614e-05	6.40846e-05	-0.442372	0.0153001	1.18057
Propyl propane thiosulfonate	3.95887e-05	7.77869e-05	-0.97444	7.88156e-06	1.78427
Vitamin D2 3-glucuronide	0.00126587	0.000971062	0.382492	0.0347495	1.04451
Hispolone	6.6651e-06	9.08881e-06	-0.447466	0.000699709	1.49855
Ganoderic acid S	2.17093e-07	1.87667e-06	-3.11179	0.0163619	1.26715
Pregnanetriolone	1.38643e-05	2.64367e-05	-0.931166	0.0022221	1.4396
2-(2-Methylbutanoyl)-9-(3-methyl-2E-pentenoyl)-2b,9a-dihydroxy-4Z,10(14)-oplopadien-3-one	8.2366e-05	0.000130234	-0.660984	0.0151096	1.20168
2,9-Dimethyl-2,9-diazatricyclo[10.2.2.25,8]octadeca-5,7,12,14,15,17-hexaene-3,10-diol, 9CI	4.39072e-06	7.00668e-06	-0.674274	2.15195e-05	1.67659
Sorbitan oleate	0.00011427	0.000162865	-0.511226	0.020435	1.15445
Zanamivir	1.30516e-06	3.18143e-06	-1.28544	0.00371712	1.35975
Lucyoside R	2.21027e-05	3.88919e-05	-0.81525	0.0136078	1.16527
3-Hydroxysintaxanthin	3.87353e-05	5.71592e-05	-0.561337	0.000654065	1.65481
Leukotriene D5	4.52259e-05	2.24734e-05	1.00893	0.00343224	1.37795
8-Hydroxy-5,6-octadienoic acid	5.0052e-06	1.07836e-05	-1.10734	0.000337766	1.62261
Threoninyl-Glutamine	4.68048e-05	2.21011e-05	1.08254	0.000138806	1.55466
L-gamma-Glutamyl-S-allylthio-L-cysteine	9.45444e-06	1.46525e-05	-0.632081	0.00668125	1.23696
Momordenol	6.52548e-05	9.75801e-05	-0.580502	0.00574046	1.30686
Karpoxanthin	6.77322e-05	0.000116998	-0.788566	0.00986239	1.23483
L-Arginine	1.44337e-05	1.88836e-05	-0.387694	0.00941693	1.3026
(E)-Raphanusanin	4.44526e-06	8.76926e-06	-0.980186	0.0102374	1.1954
(2E)-Decenoyl-ACP	0.000268763	0.000363325	-0.434928	0.0109315	1.16316
Niaziminin A	2.77391e-06	4.98043e-06	-0.844346	0.00993551	1.29524
1-(beta-D-Glucopyranosyloxy)-3-octanone	6.31091e-06	3.37835e-06	0.901527	0.018347	1.10695
Hydroxydestruxin B	3.48148e-05	5.38934e-05	-0.630408	0.00349762	1.52233
7-Aminoclonazepam	1.36037e-05	2.37951e-05	-0.806666	0.0255364	1.11592
Polysorbate 20	4.73165e-06	7.05235e-06	-0.575761	0.00123727	1.42208
Ligustilide	2.3466e-05	4.54288e-05	-0.953032	0.000592014	1.61473
Macrophorin B	2.71728e-05	7.0525e-05	-1.37597	0.00385384	1.37297
Falcarindiol	2.31731e-07	9.75779e-07	-2.07411	0.0142795	1.24696
(3b,5a,22E,24S)-Stigmasta-7,22,25-trien-3-ol 3-glucoside	0.000293076	0.000431485	-0.558037	0.0048273	1.29597
10-Hydroxy-8-nor-2-fenchanone glucoside	4.11027e-05	4.9659e-05	-0.27282	0.000632876	1.52511
Tolcapone	0.000104203	0.000188446	-0.854752	0.0239922	1.10129
2-Butyl-5-[2-(4-hydroxy-3-methoxyphenyl)ethyl]furan	7.15892e-06	9.76566e-06	-0.447976	0.0067025	1.25452
(R)-Juziphine	9.09915e-05	0.000193984	-1.09213	0.00279789	1.40601
Histidinal	2.1734e-06	3.27866e-06	-0.593154	0.00186839	1.45791
Koenimbine	4.16807e-06	6.07929e-06	-0.544523	0.000425654	1.57104
6-Keto-prostaglandin F1a	0.000248636	0.000400068	-0.686207	0.00282664	1.3835
Cholesterol	3.66745e-05	5.13261e-05	-0.484917	0.0401933	1.03831
DG(20:0/18:3(9Z,12Z,15Z)/0:0)	0.000179326	0.000252341	-0.492795	0.0222336	1.1174
Corchorosol A	1.56265e-05	2.59887e-05	-0.733893	0.00621641	1.37947
S-(9-hydroxy-PGA1)-glutathione	1.38198e-05	2.24855e-05	-0.702255	0.00050747	1.56437
(S)-4',5,7-Trihydroxy-3'-prenylflavanone	1.25451e-05	1.89186e-05	-0.592686	0.0137585	1.14957
2,3-Epoxymenaquinone	1.61306e-05	4.73636e-06	1.76794	0.0324129	1.10461
gamma-L-Glutamyl-L-pipecolic acid	1.29968e-05	6.25443e-06	1.05521	0.00111211	1.51017
Citrusinol	5.62541e-05	0.00014082	-1.32382	0.0142812	1.12454
5-(2-carboxylatoethyl)-4-oxo-4,5-dihydro-1H-imidazol-5-ide	8.31835e-07	2.04759e-06	-1.29956	0.00250837	1.49378
Atorvastatin	1.39261e-05	2.34344e-05	-0.750836	0.00325936	1.38559
Sirolimus	0.000158884	0.000222368	-0.484973	0.006492	1.30728
(E)-2-Tridecene-4,6,8-triyn-1-ol	0.00012722	0.000205565	-0.692274	0.000571	1.67091
Valproic acid glucuronide	0.000245405	4.7083e-05	2.38189	0.00555176	1.41499
PE(18:4(6Z,9Z,12Z,15Z)/24:1(15Z))	0.0150857	0.00845743	0.834893	4.04275e-07	1.8197
5-(10,13-Nonadecadienyl)-1,3-benzenediol	5.98452e-06	9.21973e-06	-0.623489	0.00083846	1.5001
Spirolide B	0.000277186	0.000391631	-0.498643	0.0341405	1.02222
7(14)-Bisabolene-2,3,10,11-tetrol	5.45529e-07	2.83503e-06	-2.37764	0.00413907	1.33834
Furanogermenone	4.47087e-05	1.97153e-05	1.18124	0.00572153	1.37162
Xanthotoxol arabinoside	2.10697e-06	3.87035e-06	-0.877291	0.00456929	1.4101
(S)-Pinocembrin	1.1024e-05	6.67662e-06	0.723459	0.0245401	1.05415
(-)-trans-3,4-Dihydro-4,8-dihydroxy-3-methyl-1H-2-benzopyran-1-one	1.54835e-05	2.43412e-05	-0.652672	0.0220018	1.12611
Corchorusoside E	4.47604e-06	1.44712e-05	-1.69289	0.00257664	1.52788
Nornicotine	1.17327e-05	2.87954e-05	-1.2953	0.00216371	1.52315
Lacto-N-triaose	0.000915259	0.00158465	-0.791911	0.00320062	1.38196
Melleolide B	5.00364e-05	6.54102e-05	-0.386536	0.0189124	1.16364
MG(0:0/14:0/0:0)	1.3077e-06	4.57704e-06	-1.80738	0.000327108	1.66849
alpha-Santalene	1.22719e-05	1.86142e-05	-0.601042	0.0238337	1.1831
Ceramide (d18:1/20:0)	4.8475e-06	9.10077e-06	-0.90875	0.00411301	1.28433
Majoroside F1	5.09767e-05	8.75299e-05	-0.779938	0.000955034	1.58018
CerP(d18:0/16:0)	6.65556e-06	1.49156e-05	-1.16419	0.0071885	1.21241
Lippioside I	2.21986e-06	3.67859e-06	-0.728687	0.00608044	1.17379
O-6-deoxy-a-L-galactopyranosyl-(1->2)-O-b-D-galactopyranosyl-(1->3)-2-(acetylamino)-2-deoxy-D-Galactose	2.04373e-07	3.79514e-06	-4.21488	0.00233202	1.44744
Hydroxyhomodestruxin B	3.95133e-06	7.55931e-06	-0.935916	0.00175553	1.43264
Physagulin D	4.26917e-05	7.22927e-05	-0.759896	0.0122879	1.17733
Acrylamide	1.52959e-05	2.0713e-05	-0.437389	0.0086546	1.23643
5-HETE	0.00139098	0.00183024	-0.395937	0.0314671	1.11298
Trigoneoside VIII	6.78079e-05	0.000100782	-0.571707	0.0143746	1.12884
Mangostanol	4.42833e-05	2.40286e-05	0.882011	0.0100201	1.30305
L-a-glutamyl-L-Lysine	1.8215e-05	1.29614e-05	0.490901	0.0215027	1.01561
Cinnarizine	7.45658e-06	1.59774e-05	-1.09944	0.00541439	1.42757
PE(DiMe(13,5)/MonoMe(11,3))	0.000909784	0.00132868	-0.546395	0.00226036	1.40833
12-Methyl-13-tridecanolide	1.14204e-05	1.53645e-05	-0.427993	0.00563339	1.34358
Trifluoperazine	3.68068e-05	2.50748e-05	0.553737	0.0478694	1.01441
Oxypurinol	1.75543e-05	1.27352e-05	0.463001	0.0116161	1.20636
DG(22:2(13Z,16Z)/22:6(4Z,7Z,10Z,13Z,16Z,19Z)/0:0)	3.2799e-06	1.8304e-06	0.841495	0.0126142	1.06821
2alpha-Hydroxypyracrenic acid	1.73281e-05	2.63585e-05	-0.605154	0.0041958	1.26353
Corchorifatty acid A	6.59536e-06	7.89072e-06	-0.258706	0.0397286	1.02118
Oxidized glutathione	3.7949e-05	0.000168365	-2.14946	7.67293e-05	1.70511
Oxypinnatanine	5.73633e-08	1.58227e-06	-4.78573	0.031411	1.0637
Vitamin K1 2,3-epoxide	1.13678e-05	2.14738e-05	-0.917628	0.011788	1.27308
Cis,trans-muconate	1.8062e-06	1.17157e-06	0.624515	0.0115784	1.26672
20-Deoxynarasin	0.0251056	0.0143329	0.80868	6.65793e-05	1.71501
Anhydrocinnzeylanine	3.29846e-05	5.52561e-05	-0.744342	0.000975439	1.53346
Gamma-terpinene	2.62393e-06	1.54306e-06	0.765938	0.00941117	1.2323
Hexadecanedioic acid mono-L-carnitine ester	2.07995e-05	2.90786e-05	-0.483407	0.00119681	1.46663
1-Hydroxyepiacorone	1.87268e-06	3.54042e-06	-0.918819	0.00221022	1.43226
6-Deoxocastasterone	6.60084e-05	9.43526e-05	-0.515413	0.0001987	1.72035
4-(2-amino-3-hydroxyphenyl)-4-oxobutanoic acid O-glucoside	1.36596e-05	4.57027e-06	1.57957	0.0253815	1.1997
Monocrotaline	3.44988e-05	6.83188e-05	-0.985735	0.0165987	1.1189
(9R,10S,12Z)-9,10-Dihydroxy-8-oxo-12-octadecenoic acid	1.56396e-06	3.93868e-06	-1.33251	0.0225479	1.20445
Testosterone enanthate	5.75438e-05	0.000109019	-0.921847	0.00312894	1.40576
Pipericine	0.0001278	0.000173864	-0.444075	0.0189732	1.16448
25-Hydroxyvitamin D3-26,23-lactone	0.00251436	0.00341026	-0.439694	0.033846	1.02061
Lucidenic acid A	0.000551062	0.00075455	-0.453401	0.0219569	1.06932
1b-Hydroxycholic acid	0.000181949	0.000124196	0.550915	0.00153998	1.42904
E,e-Carotene-3,3'-dione	4.53557e-06	7.42712e-06	-0.711519	0.00382256	1.37995
PE(14:0/14:0)	7.52168e-05	0.000129256	-0.781108	0.0192997	1.1499
Nabilone	1.40327e-05	2.59341e-05	-0.88606	0.00317665	1.50747
MG(0:0/20:1(11Z)/0:0)	0.000804165	0.00122805	-0.610804	0.00322713	1.41467
Polypodoside B	5.7803e-06	1.80726e-05	-1.64459	0.0293722	1.13999
Prostaglandin D1	5.38349e-05	0.000100173	-0.895885	0.00071002	1.55173
4-Mercaptobutyl glucosinolate	5.08781e-06	1.31606e-05	-1.3711	0.000829282	1.52203
7-Hydroxy-6-(methoxyacetyl)-2,2-dimethyl-2H-1-benzopyran	0.000183123	0.000106975	0.775538	0.00406568	1.26404
Lipoamide	5.92853e-06	1.09902e-05	-0.890468	0.000340507	1.53877
Oleanolic acid 3-[rhamnosyl-(1->4)-glucosyl-(1->6)-glucoside]	0.000117125	0.000181131	-0.628979	0.00281971	1.43938
Nicotinic acid mononucleotide	1.70317e-05	2.16838e-05	-0.348395	0.0157047	1.23653
Glutamyl-Proline	3.92104e-06	6.4662e-06	-0.721682	0.000501842	1.60612
Taraxacolide 1-O-b-D-glucopyranoside	1.79219e-05	2.37453e-05	-0.405917	0.0362601	1.1018
2-Carboxy-4-dodecanolide	4.16727e-06	6.31285e-06	-0.599187	0.00138221	1.47616
Neoacrimarine H	8.11996e-06	1.51989e-05	-0.904423	0.00712248	1.26403
(S)-4-Hydroxymandelonitrile	0.000145787	0.000269983	-0.889007	0.00181134	1.51203
Indomethacin acyl glucuronide	4.54992e-08	8.85098e-06	-7.60385	0.0230418	1.13415
Murrayanol	6.4646e-07	2.12818e-06	-1.71899	0.0242929	1.0557
2-[2-(4-Hydroxy-3-methoxyphenyl)ethyl]-5-octylfuran	2.05319e-05	3.41932e-05	-0.735842	0.0163712	1.18884
Cholest-5-ene	0.000430288	0.000587733	-0.44986	0.0474771	1.05091
LysoPE(20:1(11Z)/0:0)	0.000461903	0.000376796	0.293808	0.0194182	1.18125
Pulmatin	2.69545e-06	1.53861e-05	-2.51302	0.00416035	1.32576
Ganglioside GM3 (d18:1/16:0)	4.74224e-05	7.10275e-05	-0.582809	0.00976995	1.05682
desmethyladinazolam	3.58291e-06	6.53707e-06	-0.867512	0.0275119	1.14301
PE(18:3(9Z,12Z,15Z)/P-18:0)	6.44155e-05	0.000103824	-0.688659	0.00681592	1.21815
beta-Doradecin	5.39542e-05	0.000102676	-0.928292	0.0178639	1.12238
PC(18:0/20:4(8Z,11Z,14Z,17Z))	0.00890806	0.00310914	1.5186	2.61365e-05	1.67956
Mesterolone	5.52488e-05	6.79762e-05	-0.299085	0.0169112	1.13902
25-O-Desacetyl rifabutin	2.27354e-07	1.69448e-06	-2.89783	0.00052967	1.49586
Biotin sulfone	1.19054e-05	1.6497e-05	-0.470587	0.0237642	1.15703
pregn-5-ene-3,20-dione	9.34069e-06	1.1834e-05	-0.341335	0.0372166	1.06219
Kuwanol C	6.99578e-05	9.68368e-05	-0.46907	0.0115909	1.26029
Metixene	1.80083e-07	1.84488e-06	-3.35679	0.00389802	1.46534
Yuccaol C	5.71051e-06	1.68489e-05	-1.56096	0.000440203	1.68185
LysoPE(0:0/22:6(4Z,7Z,10Z,13Z,16Z,19Z))	0.00313352	0.00456736	-0.543577	0.0301266	1.14737
L-Pyridosine	3.15738e-05	3.79082e-05	-0.263785	0.0406736	1.07054
Pyro-L-glutaminyl-L-glutamine	5.08711e-05	2.56079e-05	0.990258	0.00370884	1.30492
Guanine	0.000324018	0.000199406	0.70036	0.00186873	1.42168
Amlodipine	5.88935e-05	3.3812e-05	0.800575	0.0290229	1.13034
5-Formiminotetrahydrofolic acid	5.6321e-07	4.40603e-06	-2.96773	0.00262435	1.49414
Solanocardinol	0.000162815	0.00028817	-0.823686	0.00609976	1.33436
Granisetron	1.56892e-06	4.80235e-06	-1.61396	0.000135212	1.67048
3D,7D,11D-Phytanic acid	0.000160869	0.000214155	-0.412771	0.018036	1.14385
Nystatin	1.85477e-05	3.69613e-05	-0.994775	0.001722	1.54653
4-Hydroxy-6-tricosanone	4.39373e-06	5.89115e-07	2.89883	0.043896	1.0016
Licoagrochalcone B	2.37592e-05	3.10566e-05	-0.386418	0.0154004	1.09813
Vanillic acid-4-O-glucuronide	0.000279564	0.00102667	-1.87673	5.419e-05	1.75344
MG(0:0/20:4(8Z,11Z,14Z,17Z)/0:0)	0.00109513	0.00157975	-0.528595	0.0231536	1.05775
Fusidic Acid	5.11104e-05	8.00875e-05	-0.647961	0.00116117	1.58637
Cyclotricuspidoside C	0.000155854	0.000249839	-0.680809	0.00185579	1.43547
3-Oxohexadecanoic acid	1.53246e-05	2.42936e-05	-0.664723	0.00278381	1.36702
Octyl 2-furoate	1.39215e-05	2.12055e-05	-0.607125	0.0322085	1.0588
15-Hydroperoxyeicosa-8Z,11Z,13E-trienoate	2.98833e-05	6.12039e-05	-1.03428	0.0351817	1.03083
2beta,9xi-Dihydroxy-8-oxo-1(10),4,11(13)-germacratrien-12,6alpha-olide	8.16083e-06	5.70094e-06	0.517516	0.00769917	1.25614
Arachidyl alcohol	1.78453e-05	3.27051e-05	-0.873977	2.00728e-05	1.70089
31-O-Demethyltacrolimus	0.000259853	0.000341978	-0.396211	0.00719587	1.37609
3-hydroxy-2-isobutyrate	2.63498e-06	7.61134e-06	-1.53036	0.00179231	1.49308
PE(14:1(9Z)/24:1(15Z))	0.0263325	0.0185411	0.506115	0.0126508	1.18095
Glutaminyl-Proline	8.98912e-07	1.64059e-07	2.45397	0.0192208	1.16488
Ganglioside GA2 (d18:1/22:0)	1.06563e-05	2.50578e-05	-1.23356	0.00312973	1.51806
Cysteinyl-Proline	6.16359e-05	0.000103639	-0.749719	0.00202859	1.45056
Methyl 3,4-dicaffeoylquinate	8.19497e-06	1.54967e-05	-0.919152	0.0455044	1.04269
Momilactone B	1.23733e-05	8.34674e-06	0.56795	0.0102233	1.19871
13-hydroxyoctadecanoic acid	1.64262e-06	5.78094e-06	-1.8153	0.000333822	1.59128
(3beta,5alpha,6beta,7alpha,22E,24R)-Ergosta-8,22-diene-3,5,6,7-tetrol	8.5228e-05	0.000130427	-0.613841	0.00919996	1.27856
Pseudomonine	5.18637e-05	6.50801e-05	-0.32749	0.0214447	1.08302
Captopril	1.67125e-05	1.25621e-05	0.411857	0.0173561	1.12475
dUMP	2.0855e-06	3.34199e-06	-0.680313	0.0107553	1.25651
3-Carboxy-2,3,4,9-tetrahydro-1H-pyrido[3,4-b]indole-1-propanoic acid	7.13962e-05	9.84777e-05	-0.46395	0.0178047	1.14438
Ziziphin	0.000376663	0.000680214	-0.852715	0.000523379	1.54424
5'-Deoxy-5-fluorocytidine	5.47677e-06	9.33777e-06	-0.769753	0.0441904	1.00295
Nor-psi-tropine	2.10171e-05	3.11831e-05	-0.569196	0.000893059	1.49952
Maduramicin	1.17499e-05	2.22856e-05	-0.92347	0.0100304	1.18879
Monoisobutyl phthalic acid	0.000223532	0.000311665	-0.479514	0.00305471	1.32575
PE(20:2(11Z,14Z)/20:3(5Z,8Z,11Z))	0.000232046	0.00048049	-1.05009	0.00015664	1.67843
O-Desmethylcarvedilol	5.40797e-07	3.73344e-06	-2.78734	0.00178559	1.47329
N6-Galacturonyl-L-lysine	3.66611e-06	1.50573e-06	1.28379	0.0330091	1.22679
Avenalumin II	0.000866235	0.000989912	-0.192541	0.0021846	1.29922
Faropenem	4.24821e-06	7.31414e-06	-0.783833	0.00647564	1.33807
Asparagoside A	5.02252e-06	1.12556e-05	-1.16416	0.0430385	1.07631
3-alpha-Androstanediol glucuronide	0.000194186	0.000142048	0.451062	0.00412768	1.23737
3-(5,6,6-Trimethylbicyclo[2.2.1]hept-1-yl)cyclohexanol	7.28602e-06	1.01995e-05	-0.485294	0.0357036	1.03152
(23S)-23,25-dihdroxy-24-oxovitamine D3 23-(beta-glucuronide)	0.000402523	0.000546428	-0.44096	0.0135872	1.1796
L-Phosphoarginine	3.39697e-06	9.0814e-06	-1.41867	0.000302209	1.62271
Wharangin	2.50679e-06	9.17149e-06	-1.87132	9.19818e-05	1.74269
Ganoderiol G	0.00111518	0.00159485	-0.516145	0.00363712	1.40397
N(6)-(Octanoyl)lysine	5.89814e-06	1.10737e-05	-0.908807	0.0434856	1.03593
Alnustone	1.03606e-05	1.72008e-05	-0.731373	0.0127833	1.13539
Centellasaponin B	1.96355e-06	4.97829e-06	-1.34218	0.013263	1.17646
Methyl nomilinate 17-glucoside	1.5031e-08	6.6036e-06	-8.77917	0.0490802	1.08398
8-Acetoxy-4-acoren-3-one	3.08967e-05	4.76403e-05	-0.624729	0.00906536	1.27864
Multinoside A	7.41078e-07	2.10469e-06	-1.50591	0.00649672	1.27131
Mepenzolate	2.86793e-06	5.43134e-06	-0.921301	0.0187942	1.24148
Permetin A	7.47994e-06	1.42962e-05	-0.93453	0.00193686	1.41458
5,6-epoxy,18R-HEPE	3.16305e-05	7.03229e-05	-1.15268	0.0365528	1.00842
Glycerophosphocholine	7.80655e-05	9.12674e-05	-0.225415	0.0274292	1.13805
2,4,12-Octadecatrienoic acid isobutylamide	1.03085e-05	1.41077e-05	-0.452655	0.00174551	1.37248
Goshonoside F2	1.71564e-05	2.6734e-05	-0.639929	0.0143743	1.22859
Momordicoside L	5.54799e-05	9.33126e-05	-0.750106	0.00659408	1.23737
7a,12a-Dihydroxy-3-oxo-4-cholenoic acid	0.00273408	0.00409535	-0.582934	0.023732	1.07398
AS 1-1	0.000114004	0.000250146	-1.13369	0.000628415	1.53606
Selegiline	4.53447e-06	9.06948e-06	-1.00008	0.00612707	1.25976
PE(20:4(8Z,11Z,14Z,17Z)/22:2(13Z,16Z))	0.00028003	0.000429909	-0.61845	0.0027895	1.42413
trans-Hexadec-2-enoyl carnitine	0.000198002	0.000150018	0.400381	0.0135018	1.18982
Oxaprozin	6.02072e-05	8.18737e-05	-0.443463	0.000828717	1.56238
Leukotriene C4	2.65255e-06	1.62047e-05	-2.61095	0.00036503	1.71083
2-[4-(3-Hydroxypropyl)-2-methoxyphenoxy]-1,3-propanediol 1-glucoside	8.9601e-05	5.57028e-05	0.685764	0.0191856	1.17594
3-hydroxyropivacaine	3.36404e-05	5.72221e-05	-0.76638	0.00489925	1.35092
N-(1-Deoxy-1-fructosyl)leucine	1.29077e-05	2.49584e-05	-0.951292	0.0010456	1.51857
LysoPE(0:0/14:0)	5.9586e-06	7.93078e-06	-0.41249	0.00309212	1.31219
Spironolactone	5.40092e-06	9.5178e-06	-0.817422	0.0195256	1.26323
Santene	7.54332e-06	9.73705e-06	-0.368285	0.00399261	1.29434
Prolyl-Arginine	2.20495e-05	3.62465e-05	-0.717096	4.07427e-05	1.77604
Cabergoline	0.00212171	0.00340609	-0.682894	0.010028	1.32209
7'-O-Methylmarmin	3.04481e-05	5.62532e-05	-0.885586	0.0236394	1.16153
p-Menthan-1-ol	1.9684e-05	2.52843e-05	-0.36122	0.00878854	1.13723
Adrenorphin	2.56987e-06	4.31923e-06	-0.749077	0.0437433	1.07191
Betavulgaroside IV	5.88547e-07	2.15623e-06	-1.87328	0.0299782	1.08633
Lucidenic acid E2	0.000499656	0.000202448	1.30338	0.0159327	1.17876
Butyl (S)-3-hydroxybutyrate glucoside	4.83994e-05	2.70312e-05	0.840365	0.0287505	1.05703
Amphotericin B	0.000120571	0.000197947	-0.715227	0.00231674	1.46368
9,12-Hexadecadienoylcarnitine	1.6479e-05	2.91205e-05	-0.821409	0.0142292	1.17656
Benzoquinoneacetic acid	0.0002388	0.000294903	-0.304437	0.00466568	1.22845
Enokipodin D	1.12195e-05	1.39735e-05	-0.316681	0.0403692	1.01096
Dodecanoic acid	0.000207762	0.000317384	-0.611294	0.00432934	1.2974
Apo-10'-violaxanthal	5.04157e-05	6.68868e-05	-0.407849	0.0150265	1.26814
Riboflavine 2',3',4',5'-tetrabutanoate	2.45683e-05	3.77635e-05	-0.620192	0.0254225	1.04751
Cinnamoside	1.75795e-06	2.92288e-06	-0.733496	0.0236695	1.09829
Guavin B	0.000127358	0.000224691	-0.819054	5.73135e-05	1.71629
PG(18:0/20:3(8Z,11Z,14Z))	0.00755925	0.00934808	-0.306427	0.0144467	1.16414
25-Hydroxyvitamin D2-25-glucuronide	1.96144e-05	3.20153e-05	-0.706844	0.00410262	1.33742
Atalantoflavone	0.00117318	0.00149369	-0.348452	0.00239155	1.34584
(Z,Z)-2-Methyl-5-(8,11,14-pentadecatrienyl)-1,3-benzenediol	2.79134e-05	3.77417e-05	-0.435202	0.009922	1.26741
Ginsenoside Mc	0.000717151	0.00116321	-0.697768	0.000505714	1.57268
5-[(4-Hydroxypheny)ethenyl]-2-(3-methyl-1-butenyl)-1,3-benzenediol	0.000101816	0.000133763	-0.393708	0.00535787	1.38993
N-Acetylneuraminic acid	6.00094e-06	1.47011e-05	-1.29266	2.63987e-05	1.77251
3-Hydroxynevirapine	8.08115e-06	1.46466e-05	-0.857938	0.0406012	1.1041
Olitorin	6.92561e-07	6.93893e-06	-3.3247	0.00636648	1.34773
N-Stearoyl tyrosine	2.58577e-05	3.20438e-05	-0.309451	0.0396026	1.00053
MG(0:0/22:2(13Z,16Z)/0:0)	0.000556047	0.000995367	-0.840021	3.1494e-05	1.751
3'-Azido-3'-deoxy-5'- O-beta-D-glucopyranuronosylthymidine	2.42899e-06	5.76686e-06	-1.24743	0.00176418	1.41034
Stevioside	4.27292e-06	2.78946e-05	-2.70669	2.4758e-05	1.79973
Hydroxy-alpha-sanshool	7.43612e-06	1.33757e-05	-0.84699	0.0163634	1.18756
6Z,9Z-octadecadienoyl-CoA	1.15508e-05	3.78211e-05	-1.7112	0.00163129	1.37785
Prostaglandin J2	0.00092664	0.00177326	-0.936325	0.000351803	1.54656
2-(3-Hydroxyphenyl)ethanol 1'-glucoside	3.49417e-05	4.69951e-05	-0.42756	0.00252738	1.32609
S-(2-Methylpropionyl)-dihydrolipoamide-E	8.77879e-06	1.22816e-05	-0.484409	0.045635	1.02035
Betavulgaroside I	7.53754e-05	4.66958e-05	0.6908	0.00194337	1.52376
PE(20:0/22:4(7Z,10Z,13Z,16Z))	0.0696832	0.0395042	0.818805	1.42038e-05	1.79603
PE(15:0/18:2(9Z,12Z))	0.00115358	0.00144326	-0.323215	0.034251	1.04496
Tyramine glucuronide	1.66224e-06	4.80707e-06	-1.53203	0.00174208	1.5841
(R)-3',7-Dihydroxy-2',4'-dimethoxyisoflavan	6.15851e-06	2.92202e-06	1.07562	0.0241305	1.15432
Rosiglitazone	8.68138e-06	2.31727e-05	-1.41643	4.93465e-07	1.85255
Muscomin	7.57603e-06	1.53027e-05	-1.01428	0.000509433	1.62096
PE(15:0/22:2(13Z,16Z))	0.0957698	0.0608825	0.653544	0.00423675	1.44462
Atenolol	9.62721e-06	1.38977e-05	-0.529661	0.0291374	1.03022
Methyl 2-(10-heptadecenyl)-6-hydroxybenzoate	2.05552e-05	2.82753e-05	-0.460041	0.00943485	1.21698
LysoPC(22:2(13Z,16Z))	3.71077e-05	5.36456e-05	-0.531742	0.00214668	1.52843
(S)-10,16-Dihydroxyhexadecanoic acid	4.393e-05	6.33422e-05	-0.527961	0.0286408	1.01143
Adrenochrome o-semiquinone	0.000202162	0.000147128	0.458446	0.0338471	1.10633
Diospyrin	5.59372e-05	0.000217847	-1.96143	4.84106e-05	1.74676
Cyclotricuspidogenin C	0.000405907	0.000485951	-0.259662	0.0220388	1.17405
Dihomo-gamma-linolenyl coenzyme A	7.75537e-06	3.01802e-05	-1.96033	0.00350963	1.30648
5-(12-Nonadecenyl)-1,3-benzenediol	3.2993e-05	5.09324e-05	-0.626422	0.0020703	1.43106
Ganoderic acid Mg	3.53003e-05	5.28881e-05	-0.583262	0.0251044	1.11726
alpha-hydroxysalmeterol	4.64846e-06	6.8489e-06	-0.559118	0.00748614	1.26777
Dihydrozeatin-7-N-dihydrozeatin	2.45955e-06	6.90017e-06	-1.48824	0.0070629	1.32629
6,11-Dihydroxy-3-methyl-3-(4-methyl-3-pentenyl)-3H,7H-pyrano[2,3-c]xanthen-7-one	5.7418e-06	8.32623e-06	-0.536161	0.00265413	1.31054
(3beta,8x,9x,15x,24x)-8,9-Epoxyergosta-5,22-diene-3,15-diol	7.04405e-06	1.09575e-05	-0.637441	0.00637344	1.25975
PS(18:0/18:0)	0.000692894	0.000896081	-0.370994	0.0110891	1.16518
MG(P-18:0e/0:0/0:0)	7.29621e-06	1.21541e-05	-0.736223	0.0221568	1.09361
2,5-Dihydro-4,5-dimethyl-2-(2-methylpropyl)thiazole	1.205e-05	5.41951e-06	1.1528	0.0192734	1.14576
5-(3',4',5'-Trihydroxyphenyl)-gamma-valerolactone-O-methyl-O-sulphate	1.09606e-05	1.94067e-05	-0.824237	0.010711	1.30267
Zucchini factor B	0.000259481	0.000343169	-0.403287	0.0334152	1.10961
(S)-Abscisic acid	7.06002e-06	3.79327e-06	0.896232	0.0022881	1.241
Amoxapine	6.80835e-06	1.04954e-05	-0.624376	0.0292451	1.05701
Pithecelloside	1.38361e-05	3.30973e-05	-1.25828	0.000393452	1.59775
Piritramide	0.000241055	0.000392509	-0.703367	0.00618952	1.37172
Temsirolimus	1.38406e-06	5.4097e-06	-1.96664	0.0262062	1.22556
Mocimycin	4.38359e-06	1.38381e-05	-1.65846	0.0307303	1.08527
3b-Hydroxy-6b-methoxy-7(11)-eremophilen-12,8a-olide	1.9645e-05	2.8544e-05	-0.539022	0.0260971	1.29469
Keratan	1.17135e-06	0	#DIV/0!	0.00446322	1.34682
N1-(5-Phospho-a-D-ribosyl)-5,6-dimethylbenzimidazole	1.2274e-05	6.18033e-05	-2.33208	0.000160409	1.69224
DHAP(18:0e)	0.000188561	0.000227993	-0.273959	0.00497042	1.24394
Armillaripin	1.30916e-05	2.31369e-05	-0.821553	0.0258088	1.04611
1-(13Z,16Z-docosadienoyl)-glycero-3-phosphate	0.000363698	0.000452221	-0.314286	0.0495706	1.08352
Neocasomorphin	1.68448e-05	8.46709e-06	0.992367	0.0307577	1.03422
(3''-Apiosyl-6''-malonyl)astragalin	2.60688e-06	5.1547e-06	-0.983561	0.0152037	1.18253
Chinenoside I	1.48211e-05	3.12757e-05	-1.07739	0.00106235	1.49348
3,11,12-Trihydroxy-1(10)-spirovetiven-2-one	2.24319e-05	4.13562e-05	-0.882551	0.000668092	1.48211
LysoPC(O-18:0)	2.44598e-05	8.64488e-06	1.5005	0.0135976	1.20888
Ganoderic acid Y	1.77535e-06	3.99156e-06	-1.16885	0.0195239	1.18351
(Z)-5-[(5-Methyl-2-thienyl)methylene]-2(5H)-furanone	8.92618e-06	1.29849e-05	-0.540718	0.000128875	1.75806
chondroitin sulfate E (GalNAc4,6diS-GlcA) proteoglycan	2.16926e-05	3.71972e-05	-0.777993	0.0253339	1.09137
(7Z,10Z,13Z,16Z)-docosatetraenoate	0.000889242	0.00153854	-0.790913	0.0247984	1.07033
Ponasteroside A	4.99863e-05	8.0787e-05	-0.692591	0.000217473	1.62587
DG(20:5(5Z,8Z,11Z,14Z,17Z)/22:5(4Z,7Z,10Z,13Z,16Z)/0:0)	0.000132686	0.000204189	-0.621888	0.0186462	1.1188
beta-Citraurinene	7.49255e-05	0.000103795	-0.470213	0.0467821	1.05903
Soyasaponin II	9.44913e-06	1.61229e-05	-0.770854	0.00407926	1.30421
Vinaginsenoside R16	7.0491e-05	0.000133296	-0.919121	1.07199e-06	1.91379
Tryptophyl-Asparagine	9.18417e-06	3.23395e-05	-1.81608	0.000166455	1.74902
4'-Methyl-(-)-epigallocatechin 3'-glucuronide	6.49388e-06	1.24972e-05	-0.944456	0.00182468	1.47974
Alcophosphamide	8.00492e-06	3.62532e-05	-2.17915	0.00576521	1.33259
Ganglioside GM3 (d18:0/12:0)	2.67694e-05	6.02885e-05	-1.1713	0.00599419	1.32055
3b,17b-Dihydroxyetiocholane	2.46277e-06	5.27605e-06	-1.09917	0.0019445	1.46459
13-Heptadecyn-1-ol	0.000132543	0.000188168	-0.505559	0.00172055	1.41329
Bupivacaine	2.85564e-06	5.12331e-06	-0.843261	0.00183536	1.47175
2,3,23-Triacetylsericic acid	2.81465e-05	4.29384e-05	-0.609311	0.00614312	1.26792
Ixabepilone	3.02803e-06	6.79766e-06	-1.16666	0.0226564	1.13504
Leucyl-Serine	7.63358e-07	2.30722e-06	-1.59572	0.0136931	1.19483
Tetraphyllin B sulfate	3.81637e-06	1.88358e-05	-2.3032	1.34051e-05	1.79525
Arginyl-Isoleucine	1.20404e-05	1.65183e-05	-0.456188	0.0150553	1.22231
Myricetin 3-(6-acetylgalactoside)	1.54049e-06	5.27496e-09	8.19001	0.014509	1.20413
4'-hydroxytrazodone	5.87062e-06	1.23918e-05	-1.0778	0.0266059	1.14344
Taxifolin 3-arabinoside	2.39381e-06	3.8016e-06	-0.667297	0.0135321	1.10457
L-Carnitine	2.21797e-06	4.19268e-06	-0.918633	0.0101927	1.21565
Methyl 5-hydroxyoxindole-3-acetate	4.13084e-05	8.53603e-05	-1.04713	0.00241654	1.40654
Capsianoside II	1.73928e-06	7.79122e-06	-2.16336	0.00932307	1.3436
Melledonal A	6.79694e-05	0.000123617	-0.862913	3.20078e-05	1.70001
Hexadecanedioic acid	3.41014e-06	6.71558e-06	-0.977682	0.00596148	1.31191
Bakkenolide C	1.25692e-05	1.78377e-05	-0.505034	0.0160428	1.22437
Allopurinol	6.9859e-05	8.35497e-05	-0.258189	0.00332946	1.27345
2-Ethylacrylic acid	2.82465e-06	3.60631e-06	-0.35245	0.00323398	1.31086
5-Ethyl-4-methyl-2-octylthiazole	2.88207e-06	7.29166e-06	-1.33914	0.0215095	1.07359
Crispolide	6.04692e-05	0.000160407	-1.40746	0.00612088	1.28648
Carpaine	6.54091e-05	0.000125634	-0.941661	0.0194442	1.1319
N-Methoxyspirobrassinol methyl ether	1.34615e-06	3.93161e-06	-1.54628	0.00011611	1.69462
Perilloside C	2.01662e-06	3.76861e-07	2.41984	0.0419289	1.02347
3a,7a-Dihydroxy-5b-cholestane	2.35933e-05	3.31499e-05	-0.490632	0.00116732	1.44608
Cyclopassifloside VII	7.35243e-05	0.000110075	-0.582199	0.035046	1.02006
5-Thymidylic acid	5.32745e-06	1.04912e-05	-0.977661	0.00956594	1.29854
Trisjuglone	9.32862e-06	1.36334e-05	-0.547409	0.00852949	1.23813
Glucosyl (2E,6E,10x)-10,11-dihydroxy-2,6-farnesadienoate	1.40225e-05	2.11757e-05	-0.594668	0.00879116	1.28088
Androstenol	1.09332e-05	1.60573e-05	-0.554508	0.00676184	1.31996
Phytosphingosine	9.29758e-06	1.90892e-05	-1.03783	0.00464758	1.27092
Ethylvanillin glucoside	1.8725e-06	2.58913e-06	-0.467501	0.0212256	1.04066
[6]-Gingerdiol 4'-O-beta-D-glucopyranoside	6.74461e-06	1.03413e-05	-0.616605	0.00952008	1.20515
1,2,10-Trihydroxydihydro-trans-linalyl oxide 7-O-beta-D-glucopyranoside	2.89087e-05	1.92245e-05	0.588554	0.0344429	1.00785
Ustiloxin B	6.84402e-06	1.08709e-05	-0.667554	0.0193773	1.11017
(3beta,17alpha,23S)-17,23-Epoxy-3,28,29-trihydroxy-27-norlanost-8-en-24-one	0.00230533	0.00352424	-0.612342	0.0268563	1.14237
LysoPC(17:0)	0.00227881	0.00300926	-0.401129	0.0386489	1.12058
Tocophersolan	3.63492e-06	7.25112e-06	-0.996278	0.00297333	1.46123
Filfiline	4.64185e-05	2.40621e-05	0.947937	0.0354228	1.20273
Momordicin I	1.93643e-05	3.34645e-05	-0.789226	0.0033962	1.43107
PE(22:6(4Z,7Z,10Z,13Z,16Z,19Z)/22:0)	0.00285868	0.00406746	-0.508781	0.00442768	1.36054
7-Epizucchini factor A	1.66898e-05	2.62255e-05	-0.652004	0.00203245	1.41226
Aspartyl-Isoleucine	1.3742e-06	2.34594e-06	-0.771572	0.0098504	1.29648
Gatifloxacin	5.50572e-07	1.34105e-05	-4.60629	0.000386157	1.63713
Butyryl-CoA	2.27345e-05	4.73424e-05	-1.05825	0.00390565	1.33754
2-Hexenoylcarnitine	1.70753e-05	2.76462e-05	-0.695167	0.0017025	1.49859
4-(Ethoxymethyl)-2-methoxyphenol	1.82943e-05	2.36573e-05	-0.37089	0.000251779	1.58103
Hydroxyprolyl-Methionine	5.85638e-06	9.02466e-06	-0.623863	0.00505534	1.40495
Trihexosylceramide (d18:1/24:0)	1.24895e-05	2.3684e-05	-0.9232	0.00470713	1.36581
Mubenin B	0.000391259	0.000595571	-0.606149	0.0378182	1.0419
Tridihexethyl	0.000226009	0.000295366	-0.386123	0.00133789	1.43196
Collettiside I	0.000721289	0.00107921	-0.581325	0.00732249	1.40102
Nivalenol	5.70292e-05	7.43888e-05	-0.383386	0.00465745	1.32967
5'-Phosphoribosyl-N-formylglycinamide	1.55561e-06	5.39965e-06	-1.79539	0.0147225	1.26051
Sarsasapogenin	0.000156725	0.000244175	-0.639683	0.00149724	1.47816
Isopropyl apiosylglucoside	1.28556e-05	1.94372e-05	-0.59642	0.0184719	1.06382
Araliasaponin I	3.36869e-05	5.66853e-05	-0.750788	0.000525047	1.60784
Notoginsenoside R1	1.42904e-05	3.05283e-05	-1.09511	0.00077773	1.62431
Frovatriptan	0.00316664	0.00364505	-0.202983	0.0460171	1.07503
Cis-zeatin-7-N-glucoside	3.83376e-06	6.68135e-06	-0.801381	0.0257347	1.1315
N-Oleoyl phenylalanine	9.32966e-05	0.000163027	-0.805215	0.00365397	1.35818
(3beta,22E,24R)-5,8-Epidioxy-23-methylergosta-6,22-dien-3-ol	6.6517e-07	7.48573e-06	-3.49235	0.0113611	1.2646
Blasticidin S	1.34733e-05	2.06555e-05	-0.61643	0.0215419	1.17381
Isoleucyl-Asparagine	2.23259e-06	3.63675e-06	-0.703928	0.00292863	1.44837
Phosphoglycolic acid	6.29131e-06	8.85391e-06	-0.492952	0.000413538	1.57146
2-methylhexenoyl-CoA	3.47941e-05	7.03374e-05	-1.01545	0.00366502	1.39366
25-Methylgramisterol	5.82235e-05	9.36645e-05	-0.685902	0.00890996	1.22809
Arachidonyl carnitine	4.82353e-06	7.02997e-06	-0.543429	0.0121866	1.25489
Camellioside D	2.93193e-05	3.84568e-05	-0.391388	0.0249996	1.03268
Sanguisorbin E	8.857e-06	2.73228e-05	-1.62522	0.00505349	1.35834
3b,15b,17a-Trihydroxy-pregnenone	1.11323e-05	2.3345e-05	-1.06837	0.000110776	1.67393
7-Acetoxy-6-hydroxylimonin	4.14423e-05	2.0767e-05	0.996814	0.0331707	1.08141
Pimecrolimus	3.64887e-06	1.036e-05	-1.5055	0.0155622	1.2105
arabinofuranosylguanine	2.30674e-05	3.77566e-05	-0.710875	0.0012604	1.51297
PE(18:3(9Z,12Z,15Z)/20:2(11Z,14Z))	0.0021298	0.00269812	-0.341236	0.00865673	1.21252
Lincomycin	5.7597e-05	7.81225e-05	-0.439746	0.00933894	1.17097
Lysyl-Tyrosine	2.01745e-05	2.60725e-05	-0.369996	0.0349416	1.04846
Cynarasaponin D	1.11847e-05	1.94148e-05	-0.79563	0.0144792	1.29858
(3beta,17alpha,23R)-17,23-Epoxy-3,29-dihydroxy-27-norlanost-8-ene-15,24-dione	0.000177237	0.000230086	-0.376494	0.0318489	1.14492
Threoninyl-Lysine	8.24266e-06	3.11808e-06	1.40245	0.0396073	1.09543
L-trans-alpha-Amino-2-carboxycyclopropaneacetic acid	0.000580852	0.000816603	-0.491464	0.0054147	1.28811
meta-O-Dealkylated flecainide lactam	7.95347e-07	2.34003e-06	-1.55687	0.0080187	1.30563
Cis-zeatin	4.46898e-06	6.78665e-06	-0.602754	0.0286736	1.06817
2-Methoxyestrone	1.92807e-05	3.02947e-05	-0.651911	0.0359483	1.0371
Pentobarbital	2.79342e-07	4.62883e-06	-4.05054	0.00896623	1.29049
gamma-Tocopheryl quinone	2.69525e-05	3.89135e-05	-0.529853	0.013518	1.20022
Indolylacryloylglycine	1.09764e-05	2.06324e-05	-0.910513	0.000540451	1.53328
Benzoyl meso-tartaric acid	1.9223e-06	3.07659e-06	-0.678498	0.000339685	1.62333
Hydroxylated lecithin	7.6747e-05	5.63421e-05	0.445897	0.00123474	1.46782
Oltipraz	6.7557e-06	1.1056e-05	-0.710659	0.00211672	1.43523
2,4-Dihydroxy-2H-1,4-benzoxazin-3(4H)-one	1.28776e-05	2.21757e-05	-0.784114	0.00127769	1.42101
Ceposide D	1.576e-05	2.6907e-05	-0.771714	0.0058721	1.30759
(all-E)-6'-Apo-y-caroten-6'-al	0.000137719	0.000205851	-0.579867	0.0099304	1.22225
Prostaglandin PGE2 1-glyceryl ester	9.57996e-07	1.80759e-06	-0.91598	0.0115048	1.28747
Thymidine 5'-triphosphate	2.72383e-07	1.07295e-06	-1.97787	0.0008268	1.45089
(+)-Chebulic acid	4.2791e-06	8.18207e-06	-0.935158	0.00691023	1.38152
Quercetagitrin	3.27275e-06	7.53633e-06	-1.20336	0.0155376	1.16918
Gibberellin A59	1.61669e-05	2.53351e-05	-0.648092	0.000734804	1.52626
Neurotensin 11-13	1.29586e-06	3.53607e-06	-1.44823	0.0487391	1.01003
Cycasin	0.000174539	0.000254765	-0.545619	0.0150748	1.29533
L-Malic acid	0.000354116	0.000228956	0.629155	0.00385604	1.37032
Vitamin A2 aldehyde	5.61158e-05	2.31127e-05	1.27972	0.00121684	1.48942
(3b,16a,21b,22a)-12-Oleanene-3,16,21,23,28-pentol-22-angeloyloxy-23-al	2.21002e-05	3.34966e-05	-0.599954	0.00118389	1.40669
2a-Hydroxygypsogenin 3-O-b-D-glucoside	0.000176778	0.000231553	-0.389401	0.0110356	1.23565
9-Oxoasimicinone	4.39435e-05	7.31907e-05	-0.736012	0.00607566	1.29339
3,4',5,6-Tetrahydroxy-3',7-dimethoxyflavone 3-glucuronide	9.49536e-08	8.79318e-06	-6.53302	0.019964	1.17197
2'-Deoxyinosine triphosphate	1.14916e-06	4.67876e-06	-2.02555	0.00144291	1.4809
Gemcitabine diphosphate	2.74396e-05	1.49988e-05	0.871411	0.00519877	1.28565
16-a-Hydroxypregnenolone	0.000241361	0.000414555	-0.780373	0.00487215	1.34531
Scopoletin	2.22813e-05	0.000133407	-2.58193	0.00141303	1.49804
Rifampin	2.96288e-06	8.77085e-07	1.75621	0.0369144	1.00927
6-Ketoestriol	7.60939e-06	1.1508e-05	-0.596789	0.000217424	1.63894
22-Angeloylbarringtogenol C	6.19453e-06	1.44749e-05	-1.22448	0.00259505	1.47656
Limonexic acid	0.000111898	0.000303539	-1.4397	0.00748036	1.31803
(S)-Verimol F	4.11193e-05	2.33507e-05	0.816349	0.012868	1.2106
4'-Methylisoscutellarein 8-(2''-sulfoglucoside)	4.29529e-06	8.40922e-06	-0.969218	0.00686205	1.30517
1,2-Dioctadecanoyl-3-(galactosyl-B-1-6-galactosyl-B-1)-glycerol	8.89276e-05	0.000117995	-0.408024	0.0106729	1.21488
Porrigenin A	0.000122669	0.000201023	-0.712588	0.00227639	1.43337
Methyl (7Z,9Z,9'Z)-6'-apo-y-caroten-6'-oate	2.45902e-06	7.30002e-06	-1.56982	0.00463002	1.39006
13-Demethyl tacrolimus	1.65454e-06	6.63727e-06	-2.00416	2.8609e-05	1.8232
Tauroursodeoxycholic acid	2.37086e-05	1.00904e-05	1.23243	0.0104864	1.26607
Pseudouridine 5'-phosphate	0.00027971	0.000593893	-1.08627	0.000854586	1.577
Midodrine	1.01848e-05	6.9455e-06	0.552269	0.00814888	1.21136
PC(22:4(7Z,10Z,13Z,16Z)/22:5(7Z,10Z,13Z,16Z,19Z))	0.00163945	0.00228861	-0.481257	0.000958373	1.46468
3-Eicosyne	0.000139996	0.00010268	0.447232	0.00779139	1.32951
Betalamic acid	1.4887e-05	2.00186e-05	-0.427291	0.00576622	1.3595
6-Methoxy-2-naphthylacetic acid	4.10419e-06	6.62932e-06	-0.691762	0.0281801	1.00814
[10]-Gingerdione	1.70015e-05	3.21109e-05	-0.917403	0.000632792	1.54438
Zoledronate	7.34793e-06	9.52371e-06	-0.374186	4.09846e-05	1.56638
Orlistat	3.3093e-05	4.37677e-05	-0.403341	0.0425393	1.05994
5-O-Methylembelin	2.58492e-05	4.17182e-05	-0.690558	0.0034846	1.36437
Melilotussaponin O2	1.16626e-06	4.03899e-06	-1.79211	0.00449187	1.43518
4-(Methylnitrosamino)-1-(3-pyridyl)-1-butanol	2.27319e-05	3.83234e-05	-0.753507	0.0247635	1.07223
Ceftiofur	4.37603e-06	9.07953e-06	-1.053	0.000612792	1.55607
Ginsenoside Rh4	0.000311912	0.000467566	-0.584029	0.0144993	1.16122
Methoxamine	1.96604e-05	2.68988e-05	-0.452248	0.0218324	1.10514
11-Ketoetiocholanolone	3.29076e-06	1.30864e-06	1.33036	0.0245314	1.07326
5,10-Pentadecadien-1-ol	3.39202e-06	5.57685e-06	-0.717306	0.0178567	1.22263
4-Hydroxy-3-(16-methylheptadecyl)-2H-pyran-2-one	0.00290599	0.0037545	-0.369589	0.0268451	1.0131
beta-Citraurin	0.000225123	0.000285555	-0.343054	0.0154872	1.13045
1-Hydroxypropan-2-yl 2-isopropyl-5-methylcyclohexyl carbonate	4.51316e-06	2.47301e-06	0.867868	0.017712	1.20341
(-)-Fumigaclavine B	3.19648e-06	4.78788e-06	-0.582904	0.0256516	1.07063
5-Phosphoribosyl-4-carboxy-5-aminoimidazole	1.80253e-05	3.25627e-05	-0.853201	0.000780318	1.53736
(2E)-Pentenoyl-CoA	6.5517e-07	1.81895e-06	-1.47317	0.0141767	1.14884
LysoPE(0:0/18:1(9Z))	0.000136624	0.00015901	-0.218908	0.0247781	1.07004
Cholestane-3,7,12,25-tetrol-3-glucuronide	3.88049e-05	6.53677e-05	-0.752339	0.00361187	1.37001
PC(15:0/20:2(11Z,14Z))	0.000220441	0.00040045	-0.861226	0.000414976	1.64558
Ketotifen	6.11953e-06	8.02802e-06	-0.391622	0.0100246	1.05784
Pristanoylglycine	1.01868e-05	1.49897e-05	-0.557273	0.0153593	1.11716
8-Hydroxythioguanine	2.15307e-05	3.51045e-05	-0.705259	4.37318e-06	1.76452
6-Heptenyl glucosinolate	5.93862e-06	2.54385e-05	-2.09881	0.00121528	1.62601
Monoacetoxyscirpenol	1.16257e-05	7.49313e-06	0.63368	0.0404775	1.06672
Ganglioside GM3 (d18:1/12:0)	3.92146e-06	1.49628e-05	-1.93192	0.00602215	1.30476
N-Stearoylsphingosine	0.000206822	0.000268226	-0.375058	0.0142311	1.05769
Ganoderic acid Mf	0.000269942	0.000351517	-0.380947	0.000238773	1.57558
Paucine	1.32444e-05	1.77611e-05	-0.423338	0.000310009	1.61614
2-(2-Furanyl)-3-methyl-2-butenal	3.35878e-05	4.3363e-05	-0.368529	0.0120983	1.20192
1-Isothiocyanato-7-(methylthio)heptane	8.10687e-05	9.92739e-05	-0.292269	0.0475159	1.0225
Phenylalanyl-Serine	1.9056e-05	2.61331e-05	-0.455632	0.00646352	1.3214
12-Oxo-20-carboxy-leukotriene B4	8.47932e-05	0.000125254	-0.56283	0.0240276	1.13223
Cucurbitacin C	0.000256281	0.000345647	-0.431572	0.00838788	1.31619
3'-N-Acetyl-4'-O-(14-methylheptadecanoyl)fusarochromanone	1.96665e-05	5.58845e-05	-1.50671	0.025562	1.06167
3-O-Sulfogalactosylceramide (d18:1/12:0)	0.000249521	0.000455491	-0.868259	0.00185416	1.41836
Stearoylethanolamide	6.03206e-05	6.89025e-05	-0.191906	0.035309	1.0496
PE(P-18:0/18:3(9Z,12Z,15Z))	0.000270326	0.000365039	-0.43335	0.04743	1.01582
4-(2-Furanylmethylene)-3,4-dihydro-2H-pyrrole	0.000137999	0.000221389	-0.681926	0.000900643	1.51537
beta-Solamarine	0.00015865	0.000296858	-0.903929	0.000792188	1.62007
Tyrosyl-Asparagine	4.11871e-06	7.29797e-06	-0.825302	0.00559016	1.29857
(+)-12a-Hydroxypachyrrhizone	3.04734e-05	4.57744e-05	-0.586988	0.00366503	1.34072
Arginyl-Aspartate	8.07185e-06	1.34967e-05	-0.74164	0.0010655	1.5399
Clocortolone	4.93991e-06	1.83136e-06	1.43157	0.0122403	1.32173
Bipindogulomethyloside	1.09784e-05	1.61164e-05	-0.553863	0.00311634	1.29524
(5S)-hydroperoxy-18-hydroxy-EPE	4.62568e-06	1.62989e-05	-1.81704	0.0331404	1.03485
Maltol propionate	1.43863e-05	1.1411e-05	0.334266	0.00126095	1.50601
8(R)-Hydroperoxylinoleic acid	3.1552e-05	2.05365e-05	0.619539	0.0200039	1.07034
Captopril-cysteine disulfide	1.98328e-05	5.08247e-05	-1.35764	0.00232966	1.40772
dCMP	6.84194e-06	2.06299e-06	1.72967	0.00132954	1.47874
PS(20:4(5Z,8Z,11Z,14Z)/14:0)	0.000338709	0.000462937	-0.450772	0.0255639	1.07481
alpha-Tocotrienoxyl radical	3.68404e-05	5.26173e-05	-0.514249	0.023287	1.15408
8-Hydroxyluteolin 4'-methyl ether 8-glucoside-3'-sulfate	5.41945e-06	1.24818e-05	-1.20361	0.00104602	1.52874
(1R*,3R*,3'S*)-1,2,3,4-Tetrahydro-1-(2-thio-3-pyrrolidinyl)-beta-carboline-3-carboxylic acid	1.38242e-05	1.90248e-05	-0.460692	0.000321606	1.63701
3-Isoxazolidinone	6.30878e-06	5.12831e-06	0.298876	0.0090739	1.24873
Hydroxyminaline	2.20941e-05	3.40508e-05	-0.624026	0.0012093	1.49963
Diplodiatoxin	3.7936e-05	4.86556e-05	-0.359039	0.0448678	1.03482
4-(2-Furanyl)-3-buten-2-one	0.000393797	0.000573241	-0.541689	0.0331621	1.04362
(3b,6a,12b,17a,20S)-Dammar-24-ene-3,6,12,17,20-pentol 20-[glucosyl-(1->2)-[rhamnosyl-(1->6)]-glucoside] 6-xyloside	0.000139328	0.000281668	-1.01551	0.0176335	1.13006
Carisoprodol	6.53118e-06	1.4775e-05	-1.17774	8.01297e-05	1.77382
Biopterin	2.64554e-05	5.29787e-05	-1.00185	0.0130707	1.21773
N-Linoleoyl GABA	0.000102969	0.000161066	-0.645432	0.00126523	1.45111
19-Norandrosterone	1.33296e-05	1.97268e-05	-0.56553	0.00265695	1.40435
Cohibin C	4.30133e-06	1.1398e-05	-1.40593	0.0259153	1.09181
(3b,6a,12b,17a,20S)-Dammar-24-ene-3,6,12,17,20-pentol 20-[glucosyl-(1->2)-[rhamnosyl-(1->6)]-glucoside] 6-glucoside	2.71694e-06	6.65963e-06	-1.29346	0.0251235	1.14035
Capsicoside C3	3.99755e-05	8.17309e-05	-1.03176	0.000256243	1.68407
Cerulenin	2.99443e-05	0.000110521	-1.88396	0.000738787	1.58453
ADP-Ribosyl-L-arginine	2.32552e-06	8.03649e-08	4.85484	0.00404725	1.42462
4beta,7alpha-dihydroxycholesterol	0.000268118	0.000414396	-0.628141	0.00397527	1.35944
Eszopiclone	1.7186e-05	2.91861e-05	-0.764044	0.00813311	1.23835
alpha-Tocopherol acetate	2.7329e-05	4.49289e-05	-0.717209	0.000462606	1.52159
Dehydrocurdione	0.00177536	0.00227119	-0.355338	0.00992676	1.21833
Phytolaccinic acid	0.000597959	0.00098622	-0.721863	0.0139832	1.21972
Xanthurenate-8-O-beta-D-glucoside	3.65355e-05	9.51816e-05	-1.38138	0.00748669	1.22552
Tetradecanoylcarnitine	0.00103366	0.00159471	-0.625535	0.0078393	1.30984
Methylthiomethyl 2-methylbutanethiolate	8.52524e-06	1.21151e-05	-0.506994	0.000528373	1.53233
N,O-Didesmethyltramadol	1.51832e-05	5.33582e-06	1.50869	0.017756	1.16757
Marmeline	5.43345e-06	1.09666e-05	-1.01317	0.0353225	1.0855
Methotrimeprazine	2.23865e-05	1.43818e-05	0.63838	0.0314391	1.0891
Serinyl-Tyrosine	3.93787e-05	0.000296208	-2.91112	0.00279246	1.52377
17-Hydroxypregnenolone sulfate	3.21534e-06	1.48407e-06	1.11542	0.012814	1.06456
LPA(0:0/18:0)	1.55875e-05	2.25308e-05	-0.531504	0.0159946	1.11573
Linoleoyl ethanolamide	3.61843e-05	4.67938e-05	-0.370954	0.00462536	1.29741
1,1'-Ethylidenebis-cyclopentane	1.50247e-05	2.10304e-05	-0.485135	0.019513	1.14623
2,6-Dimethyl-7-octene-1,6-diol 8-O-glucoside	5.66145e-07	2.12301e-06	-1.90687	0.000192879	1.60687
Saponin H	6.17941e-05	0.000126955	-1.03877	0.0156957	1.15868
LysoPE(0:0/24:0)	1.59009e-05	4.36292e-05	-1.45618	0.00295907	1.5497
7 alpha-Hydroxy-3-oxo-4-cholestenoate	8.03955e-06	1.53667e-05	-0.934624	0.0072413	1.28074
beta-D-3-Ribofuranosyluric acid	2.54861e-05	3.02856e-05	-0.248923	0.00893759	1.18472
Norpandamarilactonine A	0.00026496	0.000426426	-0.686518	0.000905094	1.51072
N-Hexadecanoylpyrrolidine	8.54751e-05	6.20668e-05	0.461682	0.0162082	1.17954
2''-Methoxy-(S)-oleuropein	3.72593e-05	7.69181e-05	-1.04572	0.0278288	1.02552
(3beta,17alpha,23S,24S)-17,23-Epoxy-3,24,29-trihydroxy-27-norlanost-8-en-15-one	0.00187775	0.00259727	-0.467995	0.00557573	1.37322
PC(16:0/20:4(8Z,11Z,14Z,17Z))	0.000342243	0.000471547	-0.462379	0.00285453	1.38038
Tripoxyrollin	5.89264e-05	8.26098e-05	-0.4874	0.00221793	1.38663
Deferoxamine	1.89583e-06	4.78115e-06	-1.33453	0.0299852	1.27271
Periandrin I	3.36774e-07	8.31849e-06	-4.62647	0.0299206	1.02672
Pyridinoline	2.0858e-06	5.51933e-06	-1.4039	0.0429457	1.04456
Niazirin	9.95234e-06	2.11439e-05	-1.08713	0.000189421	1.64961
L-isoleucyl-L-proline	2.1368e-05	3.82599e-05	-0.840379	0.00867637	1.29786
Desacetyl-nitazoxanide	1.02263e-05	1.91581e-05	-0.905663	0.00240078	1.50916
(+)-threo-2-Amino-3,4-dihydroxybutanoic acid	2.55485e-05	6.89902e-06	1.88877	1.63476e-08	1.9128
6(beta)-hydroxyprogesterone	3.26256e-06	7.00351e-06	-1.10207	0.0330728	1.133
8-Hydroxy-7-methylguanine	3.63467e-05	6.81826e-05	-0.907582	0.00108702	1.63147
Menthone 1,2-glyceryl ketal	0.000158953	0.000214693	-0.433676	0.000476941	1.50346
Protobassic acid	1.42109e-06	6.28335e-06	-2.14453	0.0324468	1.05318
1-Acetoxy-2-hydroxy-16-heptadecyn-4-one	8.82896e-06	1.31275e-05	-0.572273	0.00133619	1.44767
Soyasaponin V	5.72452e-05	0.000154749	-1.4347	0.000365598	1.66162
3-Dehydroxycarnitine	0.000383618	0.000335065	0.195229	0.0219565	1.16878
Dehydrooreadone	5.12457e-05	6.21615e-05	-0.27859	0.00389232	1.29669
(2S)-2-Butanol O-[b-D-Apiofuranosyl-(1->6)-b-D-glucopyranoside]	1.69673e-05	2.94211e-05	-0.79409	0.000374327	1.59839
D-Pantothenoyl-L-cysteine	5.04511e-06	1.79997e-05	-1.83502	0.00526304	1.2962
Gabapentin	0.000165899	0.000247896	-0.579429	0.00155067	1.58747
2-Hydroxymyristoylcarnitine	4.75761e-05	7.36346e-05	-0.630147	0.00748009	1.26414
17a-Hydroxypregnenolone	0.00100644	0.00145155	-0.528325	0.024101	1.16515
Sylpin	1.22783e-05	1.68276e-05	-0.454717	0.0171743	1.23836
2-Isopropyl-5-methylpyrazine	0.000112985	0.000156679	-0.471676	0.00151412	1.57009
Cholesteryl acetate	9.45887e-06	1.773e-05	-0.906456	5.82251e-06	1.80015
Succinylcholine	2.52931e-06	4.59176e-06	-0.860303	0.00622847	1.31115
(25R)-3beta,4beta-dihydroxycholest-5-en-26-oate(1-)	6.24002e-05	0.000104884	-0.749171	0.012307	1.23004
N-Decane	3.74598e-06	7.31556e-06	-0.965627	0.00541936	1.37134
19-Nor-5-androstenediol	1.90362e-05	2.83012e-05	-0.572123	0.000473761	1.58068
(3beta,17alpha,23S)-17,23-Epoxy-3,29-dihydroxy-27-norlanost-8-en-24-one	2.64554e-05	4.85773e-05	-0.87672	0.0158809	1.21489
Notoginsenoside B	1.64577e-05	3.54488e-05	-1.10697	0.00436351	1.38996
Bacampicillin	9.83635e-07	5.48533e-06	-2.47938	0.000154258	1.62897
Isopentyl beta-D-glucoside	1.63379e-05	2.20828e-05	-0.434707	0.00146974	1.43248
Cyanidin 3-O-(6''-acetyl-arabinoside)	1.56961e-07	4.07711e-06	-4.69907	0.0188975	1.16883
Koeniginequinone B	7.77561e-07	2.14847e-06	-1.46628	0.0446818	1.089
Pyranocyanin A	0	3.09416e-06	#DIV/0!	0.0151721	1.27074
Nalbuphine	0.000119216	7.02948e-05	0.762083	0.0061389	1.37181
Maltol	0.000201204	0.000251543	-0.322143	0.00710246	1.20654
9Z,12Z,15Z-octadecatrienoyl-CoA	2.44077e-06	9.939e-06	-2.02576	0.00172898	1.34029
Lauroyl diethanolamide	3.19145e-06	6.64471e-06	-1.05799	0.0178987	1.12584
Taxiphyllin	7.72394e-06	2.31353e-05	-1.58268	0.00117989	1.58661
dIDP	1.19797e-06	4.40668e-06	-1.8791	0.00864388	1.27891
(S)-5-Diphosphomevalonic acid	0.000108775	0.000158442	-0.542613	0.00514739	1.26807
Raphanusamic acid	0.000179561	0.000218842	-0.285409	0.000743311	1.53345
Ganglioside GM3 (d18:0/14:0)	6.74658e-05	0.000131628	-0.964237	0.00513647	1.40953
5a-Cholesta-8,24-dien-3-one	0.000333628	0.000532088	-0.673425	0.0197014	1.18461
Polyporusterone F	0.00128078	0.00180283	-0.493243	0.00939902	1.25967
4-Phosphopantothenoylcysteine	2.44078e-05	9.93114e-06	1.29731	0.00120359	1.45908
Ornithinium(1+)	5.95377e-06	7.60729e-06	-0.353579	0.00960855	1.14385
Polyoxyethylene 40 monostearate	1.29039e-05	1.91245e-05	-0.567611	0.00997318	1.297
2-Hydroxyfluorene	3.46674e-06	8.33451e-06	-1.26552	0.0110496	1.24071
3-hydroxypristanic acid	2.34043e-06	4.08224e-06	-0.802587	0.00665935	1.23732
5-Hydroxy-p-mentha-6,8-dien-2-one	2.39603e-05	3.35351e-05	-0.485022	0.000297366	1.61937
(2E)-Butenoyl-CoA	9.67706e-07	3.37315e-06	-1.80146	0.000887993	1.5712
Isolicoflavonol	8.86271e-06	1.44275e-05	-0.703006	0.000984326	1.61524
2,6-Di-tert-butyl-4-ethylphenol	2.84006e-06	3.96324e-06	-0.48076	0.00207122	1.39144
6-Butyltetrahydro-2H-pyran-2-one	2.00662e-06	3.02421e-06	-0.591793	0.0112159	1.12169
(4R,5S,7R,11x)-11,12-Dihydroxy-1(10)-spirovetiven-2-one 12-glucoside	3.91023e-05	1.51301e-05	1.36984	0.00463153	1.35832
5-Megastigmen-7-yne-3,9-diol 3-glucoside	3.35223e-06	5.19848e-06	-0.632971	0.016317	1.09949
2-(2-Methylpropoxy)naphthalene	3.16077e-05	9.16072e-05	-1.53519	0.00244947	1.4195
(S)-Batatic acid	7.55515e-06	3.24364e-06	1.21985	0.00418667	1.31401
beta-Tocopheryl quinone	1.67732e-05	2.5159e-05	-0.584915	0.013379	1.23387
15-Octadecene-9,11,13-triynoic acid	9.20549e-05	0.000125311	-0.444947	0.00287424	1.36179
PE(DiMe(11,5)/DiMe(13,5))	0.000201807	0.000282233	-0.483905	0.00347607	1.38418
Presqualene diphosphate	9.54887e-06	1.71848e-05	-0.84773	0.00104387	1.64445
Moxifloxacin	1.27837e-06	8.43934e-06	-2.72283	0.000151554	1.63085
Neuromedin N	1.40753e-05	1.89825e-05	-0.431506	0.0404498	1.18101
1-Nitro-5-glutathionyl-6-hydroxy-5,6-dihydronaphthalene	3.69893e-07	7.57611e-06	-4.35628	0.00148873	1.53773
Ranitidine	5.1046e-06	8.90936e-06	-0.803524	0.0173362	1.12439
1,2',3,5-Tetra-O-galloylhamamelofuranose	2.12402e-07	1.26089e-06	-2.56957	0.000104231	1.60472
Matricin	1.5796e-05	7.13922e-06	1.14572	0.0125261	1.13295
2-Deoxy-D-ribitol	0.000124337	0.00022673	-0.866715	0.00111625	1.48521
4-Acetyl-2-methylpyrimidine	2.13e-05	1.35034e-05	0.657525	0.0135835	1.0457
GDP-alpha-D-mannose(2-)	4.99304e-06	8.30954e-06	-0.734852	0.00197074	1.48657
Medicanine	4.23624e-05	7.42439e-05	-0.809489	0.0005798	1.60893
Hexylresorcinol	1.20716e-07	2.06867e-06	-4.09902	0.000277793	1.7663
Scutellarein 7-glucuronosyl-(1->2)-glucuronide	4.81525e-08	4.47894e-06	-6.5394	0.0241074	1.15532
10-Formyltetrahydrofolate	5.97172e-06	1.07413e-05	-0.846948	0.0325458	1.08554
Schleichol 1	5.20743e-05	8.53257e-05	-0.712408	0.00630067	1.2566
CDP-DG(16:0/22:3(10Z,13Z,16Z))	2.55077e-05	4.0293e-05	-0.659599	0.00170486	1.39085
PS(DiMe(13,5)/MonoMe(11,5))	0.000234926	0.000471254	-1.0043	0.0139405	1.12189
Cryptomeridiol 11-rhamnoside	1.73685e-05	3.34307e-05	-0.944701	0.00197191	1.4772
3,4',5,7-Tetrahydroxy-6-methoxyflavone	2.10089e-06	1.63168e-07	3.68657	0.00575082	1.34173
4-Hydroxy-2,6,6-trimethyl-3-oxo-1,4-cyclohexadiene-1-carboxaldehyde	1.98319e-05	2.7115e-05	-0.451268	0.0110981	1.19262
Ustiloxin A	9.61006e-06	1.33123e-05	-0.470141	0.0229515	1.10268
Sitaxentan	9.58766e-05	0.00014299	-0.576662	0.00169388	1.35931
1,3-Diacetoxy-4,6,12-tetradecatriene-8,10-diyne	3.73038e-05	4.96951e-05	-0.413781	0.00122213	1.44324
LysoPE(0:0/16:0)	0.00574395	0.00724248	-0.334441	0.022093	1.09533
8-[(Aminomethyl)sulfanyl]-6-sulfanyloctanoic acid	2.10223e-05	3.10846e-05	-0.564278	0.000713172	1.46115
Prostaglandin G2	8.01274e-06	1.1809e-05	-0.559516	0.0282946	1.12708
Auberganol	8.19921e-06	1.86472e-05	-1.1854	0.00050038	1.43075
15-hydroxyicosanoic acid	8.52366e-06	1.61608e-05	-0.92295	0.00295258	1.37253
(6E)-Piperamide-C7:1	9.08052e-06	1.43055e-05	-0.655719	0.00371954	1.47539
2,6,10,10-Tetramethyl-1-oxaspiro[4.5]decan-6-ol	5.6826e-05	9.07771e-05	-0.675776	1.44642e-05	1.80244
MG(0:0/20:3(11Z,14Z,17Z)/0:0)	0.000504947	0.000877343	-0.797008	0.00486697	1.35661
FAD	2.65842e-05	4.68482e-05	-0.817424	0.0059903	1.26509
LysoPE(0:0/18:0)	0.00801766	0.00998002	-0.315862	0.000688137	1.52055
(3b,6b,8a,12a)-8,12-Epoxy-7(11)-eremophilene-6,8,12-trimethoxy-3-ol	8.93133e-06	2.15357e-05	-1.26978	0.0178168	1.0815
2,4,8-Eicosatrienoic acid isobutylamide	5.43807e-06	1.26752e-05	-1.22084	0.000167276	1.58864
Lycoperdic acid	3.26747e-06	7.98705e-06	-1.28949	0.00156301	1.44486
Alphachloralose	2.11119e-05	2.96431e-05	-0.489643	0.00256798	1.34743
6-Sinapoylglucoraphenin	9.96885e-06	1.85098e-05	-0.892787	0.00398633	1.24837
12-Ketodeoxycholic acid	5.0229e-06	7.95472e-06	-0.663291	0.0153715	1.23057
Pseudoginsenoside Rc1	7.1685e-05	0.000140571	-0.971555	0.00117399	1.53432
Ganglioside GM3 (d18:0/18:1(11Z))	7.68137e-06	1.63689e-05	-1.09152	0.00622414	1.4016
N-arachidonoylglycinate	9.9255e-06	1.65478e-05	-0.737423	0.0197601	1.11392
Di-2-thienyl disulfide	2.2846e-05	3.63111e-05	-0.668469	0.00150439	1.39106
CDP-DG(18:0/22:3(10Z,13Z,16Z))	1.0028e-05	2.45971e-05	-1.29445	0.000914765	1.55506
PE(22:1(13Z)/22:6(4Z,7Z,10Z,13Z,16Z,19Z))	0.000325735	0.000642146	-0.979202	0.000102885	1.75021
Glycosides	4.28042e-05	1.22602e-05	1.80377	0.0170241	1.17367
Ornithine	3.11198e-05	1.39003e-05	1.16272	0.00529496	1.30219
2-Heptylbenzothiazole	3.41769e-06	4.73239e-06	-0.469546	0.0261681	1.0022
9-Hydroxycalabaxanthone	3.46656e-06	8.20485e-06	-1.24297	0.00881265	1.22668
1-Methyl-3-(2-thiazolyl)-1H-indole	4.60103e-06	7.40754e-06	-0.68704	0.00823293	1.38248
(E)-4-Octenoic acid	0.000517916	0.000851358	-0.717047	0.000170092	1.77028
N-Methoxyspirobrassinol	1.99638e-05	4.84727e-05	-1.27978	1.92057e-05	1.77436
Suxibuzone	3.97705e-05	2.17875e-05	0.868202	0.00660004	1.23114
5-Methoxytryptamine	1.02429e-05	1.58322e-05	-0.628245	0.0203348	1.15377
25-Azacholesterol	7.55182e-06	1.52772e-05	-1.01649	0.0121458	1.23582
Glycopyrrolate	9.76397e-06	1.5783e-05	-0.692833	0.0152677	1.14832
Cavipetin A	1.86828e-05	5.29382e-05	-1.50259	0.0177281	1.11325
Dienestrol	4.45847e-06	8.66434e-06	-0.958542	0.0167171	1.10049
5,6-Epoxy-8,11,14-eicosatrienoic acid	0.000301046	0.000500004	-0.731955	0.0350217	1.005
3-Hydroxyhexadecanoylcarnitine	2.84974e-05	6.41403e-06	2.15153	0.00398907	1.39987
2-Hydroxy-3-methyl-4H-pyran-4-one O-(6E-cinnamoyl-b-D-glucoside)	2.29587e-05	4.05872e-05	-0.821982	0.00242223	1.4037
Acetyl-CoA	8.43629e-07	7.62197e-06	-3.17548	0.000117833	1.74601
4',5-Dihydroxy-3,3'-dimethoxy-6,7-methylenedioxyflavone 4'-glucuronide	1.80766e-06	9.68542e-06	-2.42169	0.000867067	1.47127
Melilotussaponin O1	3.78677e-06	1.15352e-05	-1.607	0.000508468	1.58438
MG(0:0/22:6(4Z,7Z,10Z,13Z,16Z,19Z)/0:0)	0.000875686	0.00101323	-0.210472	0.00784241	1.27971
PS(DiMe(11,5)/MonoMe(13,5))	0.00101234	0.0014071	-0.475033	0.0200607	1.0838
PE(18:3(6Z,9Z,12Z)/P-18:1(11Z))	0.000111488	0.000168593	-0.59665	0.0150322	1.18524
Heneicosanoic acid	1.94193e-05	4.97022e-05	-1.35582	0.000101463	1.5836
5-Hydroxy-4-methoxy-5-(1-oxo-9,12,15-hexadecatrienyl)-2(5H)-furanone	8.35589e-06	1.21046e-05	-0.534691	0.00344093	1.34107
1-O-E-Cinnamoyl-(6-arabinosylglucose)	5.37902e-06	1.19731e-06	2.16754	0.046402	1.06239
Aspartyl-Cysteine	7.77025e-06	1.12423e-05	-0.532904	0.00269435	1.4045
Methylgallic acid-O-sulphate	1.64576e-06	4.36637e-06	-1.40768	0.000285397	1.61853
Chondroitin 4-sulfate	4.01681e-06	1.32026e-05	-1.7167	0.00032654	1.68706
L-2,3-Dihydrodipicolinate	2.75557e-05	3.84051e-05	-0.478946	0.00441774	1.33327
Gamma-linolenyl carnitine	0.000116436	0.000178263	-0.614473	0.000766095	1.55842
3-hydroxypentadecanoyl carnitine	2.64214e-05	1.43794e-05	0.8777	0.00421418	1.24182
DG(15:0/22:4(7Z,10Z,13Z,16Z)/0:0)	0.000773185	0.00102128	-0.401488	0.0042544	1.31089
DG(16:0/20:4(8Z,11Z,14Z,17Z)/0:0)	1.77621e-05	4.17473e-05	-1.23288	0.00887106	1.31376
3-Hexaprenyl-4,5-Dihydroxybenzoic acid	3.75428e-06	7.28295e-06	-0.955986	0.0127122	1.33376
Cefixime	3.16785e-07	4.06192e-06	-3.68059	0.000859442	1.68606
Hydroxylated N-acetyl desmethyl frovatriptan	3.73949e-05	2.03034e-05	0.881119	0.0158229	1.22438
Quercetin 3-(6''-caffeoylsophorotrioside)	1.93853e-07	2.61816e-06	-3.75551	0.00326936	1.40409
Uridine diphosphate glucose	1.33099e-05	2.09622e-05	-0.655292	0.0226233	1.12488
Ethylsuberenol	5.53706e-05	3.72656e-05	0.571275	0.0208669	1.08045
8,12-Epoxy-4(15),7,11-eudesmatrien-1-one	1.12451e-05	1.72413e-05	-0.616577	0.00175792	1.4373
Nicotine glucuronide	7.61842e-05	5.43803e-05	0.486408	0.00772424	1.11647
15-Keto-13,14-dihydroprostaglandin A2	0.000417893	0.000257625	0.697864	0.0244438	1.02354
3-Hydroxydodecanedioic acid	1.75151e-05	2.1368e-05	-0.286854	0.00277886	1.35132
Momordicoside I	0.000133918	0.00022108	-0.723222	0.0202382	1.11029
Helianthoside A	4.55801e-06	9.12589e-06	-1.00156	0.0130151	1.20481
N-Despropyl-rotigotine	3.28919e-05	4.49381e-05	-0.450209	4.9615e-05	1.74818
4-Hydroxybenzoic acid	1.32177e-05	1.85478e-05	-0.488783	0.000573346	1.48086
6-Hydroxy-2,6-dimethyl-2,7-octadien-4-one	8.8037e-06	1.60065e-05	-0.862474	0.000584871	1.54866
Cefpodoxime	8.60681e-06	2.7649e-05	-1.68368	0.0309756	1.16256
Glutaconylcarnitine	7.3129e-06	2.73663e-07	4.73997	0.00481013	1.38871
Lamivudine-monophosphate	3.388e-06	8.84492e-06	-1.38442	0.000209482	1.63885
Isosojagol	4.1912e-05	6.14783e-05	-0.552713	0.00087121	1.53445
(3beta,23E)-3-Hydroxy-27-norcycloart-23-en-25-one	0.000106638	0.000157522	-0.562835	0.00777412	1.27321
(24R)-5b,8b-Epidioxyergosta-6,22E-dien-3b-ol 3-glucoside	0.000105671	0.000179643	-0.765558	0.00640284	1.26515
PE(15:0/18:3(9Z,12Z,15Z))	0.00111961	0.0012513	-0.160428	0.0174353	1.13326
Araliasaponin III	6.51864e-07	7.62824e-06	-3.54871	0.00305245	1.38747
Momoridcin	7.10638e-05	0.000131313	-0.885823	0.00694586	1.14512
Caryoptosidic acid	1.09546e-05	2.75539e-05	-1.33072	2.65234e-05	1.69187
Ouabain	7.92533e-06	1.08625e-05	-0.454816	0.0308362	1.01604
Tiaprofenic acid	1.5929e-05	4.31542e-05	-1.43785	0.000146257	1.71264
6-Thioguanosine monophosphate	2.37907e-06	4.42091e-06	-0.893942	0.00131424	1.45666
D-erythro-Eritadenine	1.37854e-05	2.10665e-05	-0.611811	0.00221072	1.52152
Fumonisin B4	5.07286e-05	9.31503e-05	-0.876762	0.028103	1.07541
Idoxanthin	2.45425e-05	4.03182e-05	-0.716147	0.0400878	1.0226
N5-Acetyl-N2-gamma-L-glutamyl-L-ornithine	4.92968e-06	7.80331e-06	-0.662591	0.00819924	1.31104
3b-Hydroxy-5-cholenoic acid	1.49089e-05	1.8664e-05	-0.324085	0.00202254	1.34532
25-Cinnamoyl-vulgaroside	1.36046e-05	2.81714e-05	-1.05014	8.99207e-05	1.62861
Cytidine 2',3'-cyclic phosphate	2.70914e-06	5.23876e-06	-0.95139	0.000815207	1.58274
N-Undecanoylglycine	0.000154509	0.000199073	-0.365606	0.022078	1.06803
Retinol acetate	0.000209899	0.000138096	0.604023	0.00840231	1.15343
Tranexamic Acid	0.000387338	0.000538885	-0.476386	0.000820979	1.44931
Nb-trans-Feruloylserotonin glucoside	5.10557e-06	1.54531e-05	-1.59776	0.0301417	1.17891
(23S,24S)-17,23-Epoxy-24,29-dihydroxy-27-norlanost-8-ene-3,15-dione	4.7086e-05	8.81715e-05	-0.905013	0.00204099	1.49017
1-Methoxy-3-(4-hydroxyphenyl)-2E-propenal 4'-glucoside	4.46178e-05	6.16928e-05	-0.467483	0.0119427	1.22057
CPA(18:1(11Z)/0:0)	2.56603e-05	3.07922e-05	-0.26303	0.0273339	1.03329
Arachidyl carnitine	8.91996e-05	0.000164395	-0.882061	1.09264e-07	1.94302
Ganoderic acid L	8.51912e-05	0.000121791	-0.515628	0.0219157	1.16044
Bufotenine O-glucoside	5.94885e-06	8.58216e-06	-0.528731	0.0298235	1.10235
4-O-alpha-D-Galactopyranuronosyl-D-galacturonic acid	3.98309e-06	1.75505e-05	-2.13955	0.00713366	1.2667
Lippioside II	3.65133e-06	2.15285e-05	-2.55975	0.00085766	1.58641
Guanosine pentaphosphate adenosine	5.86438e-07	2.169e-06	-1.88698	0.00249491	1.36477
Isopropyl hexadecanoate	1.3044e-05	1.7966e-05	-0.46188	0.000873669	1.45843
Gingerglycolipid A	4.19213e-05	8.38252e-05	-0.999701	0.0199112	1.13291
cis- and trans-2-Isopropyl-4-methyl-1,3-dioxolane	6.36165e-06	1.38822e-05	-1.12577	9.40159e-05	1.72064
Creatinine	3.16901e-07	4.47179e-07	-0.49682	0.0379569	1.04412
beta-Citraurol	0.000153982	0.000220889	-0.520558	0.00960943	1.25183
5-Deoxyribose-1-phosphate	2.69462e-05	3.65134e-05	-0.438345	0.00408581	1.34445
4-nitrophenolate	3.88014e-05	5.77315e-05	-0.57325	0.00178549	1.38977
3 beta,7 alpha-Dihydroxy-5-cholestenoate	5.06677e-05	7.59435e-05	-0.58386	0.00549022	1.31064
alpha-Amylcinnamyl isovalerate	4.31424e-06	6.67332e-06	-0.629297	0.0159594	1.1684
DG(18:0/20:2(11Z,14Z)/0:0)	0.000308402	0.000438664	-0.508305	0.0254795	1.11673
Protoprimulagenin A 3-[glucosyl-(1->3)-galactosyl-(1->4)-[rhamnosyl-(1->2)]-glucuronide]	8.80856e-06	2.20891e-05	-1.32635	0.000534847	1.56373
Hypogeic acid	4.2127e-06	9.90937e-06	-1.23405	0.0116152	1.24711
DG(18:4(6Z,9Z,12Z,15Z)/18:1(11Z)/0:0)	0.000269763	0.000450211	-0.738911	0.00382846	1.33817
Propyl cinnamate	4.27855e-06	8.7253e-06	-1.02808	0.0018644	1.46264
3-Methyl-1,2,4-trithiane	3.41804e-05	4.52801e-05	-0.405709	0.00127705	1.42252
PE(P-16:0e/0:0)	0.000104121	0.000153782	-0.562629	0.0419978	1.03528
2',4',5,7,8-Pentahydroxyisoflavone	7.09427e-06	1.36116e-06	2.38182	0.000944155	1.516
Imidazoleacetic acid ribotide	3.02049e-06	5.80873e-06	-0.943441	0.0220689	1.06856
Veranisatin C	2.36607e-05	8.81362e-05	-1.89724	1.69339e-05	1.81139
Rhamnalpinogenin	2.77862e-06	1.23035e-05	-2.14663	0.000831424	1.67924
Taurocyamine	5.11616e-06	2.48252e-06	1.04326	0.00744297	1.36714
beta-Casomorphin (1-6)	7.84102e-06	4.27746e-05	-2.44764	0.00263876	1.47177
Octadecanamide	0.000297535	0.000234351	0.344389	0.00655335	1.31397
4-Androstenediol	2.6321e-05	4.96433e-05	-0.915382	0.0185022	1.14173
Goyaglycoside h	1.98606e-05	3.68337e-05	-0.891122	0.00446721	1.3934
Araliasaponin V	2.62073e-06	5.58625e-06	-1.09191	0.012211	1.21099
cis-4-Decenol	9.80111e-06	1.77643e-05	-0.857965	0.000343581	1.46574
Wyerone	1.97892e-06	9.64966e-06	-2.28576	0.00111133	1.52367
3'-Glucosyl-2',4',6'-trihydroxyacetophenone	9.5549e-05	0.000220897	-1.20906	0.000197709	1.64739
3-(4-Hydroxybenzoyl)epicatechin	5.69422e-06	6.51838e-07	3.12691	0.00180777	1.51173
Octadecanol	4.34829e-05	6.91934e-05	-0.670185	0.000109484	1.6273
Torvoside C	1.2619e-05	1.98519e-05	-0.653683	0.0167255	1.24838
4-Hydroxy-6-nonadecanone	4.90656e-05	6.58126e-05	-0.423651	0.00148852	1.4213
1-(Methylsulfinyl)propyl propyl disulfide	3.40899e-06	4.40639e-06	-0.370253	0.000235869	1.53945
Hydroxynalidixic acid	1.83599e-05	2.89764e-05	-0.658325	0.00137504	1.47008
1-Methylhypoxanthine	9.46883e-06	1.36155e-05	-0.523995	0.00379716	1.28932
Suberic acid	1.75598e-06	3.74798e-06	-1.09384	0.000453989	1.66419
Ginkgolic Acid	3.60732e-05	4.91189e-05	-0.44535	0.0303838	1.16725
N4-acetyl-2'-O-methylcytidine	2.2183e-06	4.70987e-06	-1.08623	0.000144283	1.59439
Androstendione	2.54496e-06	4.6833e-06	-0.879882	0.00602376	1.35168
16,16-dimethyl-PGA1	2.08808e-05	3.45157e-05	-0.725075	0.0311313	1.08218
Thapsigargin	0.00163708	0.000748326	1.12939	0.00855411	1.33394
Lithocholic acid	0.000191396	0.000264635	-0.467446	0.021805	1.14103
Valyl-Tryptophan	2.60465e-06	4.58504e-06	-0.815844	0.0420334	1.06025
7-Methylguanosine	1.80589e-05	9.58178e-06	0.914342	0.0231147	1.1524
Miglitol	1.289e-05	2.17508e-05	-0.754817	0.0016862	1.45873
Leukotriene E4	6.23078e-05	9.22977e-05	-0.566881	0.0140618	1.1912
gamma-L-Glutamyl-L-glutamic acid	4.50974e-06	9.2357e-06	-1.03418	0.00459018	1.42043
1-Stearoyl-2-hydroxy-sn-glycero-3-phosphocholine	0.00151481	0.00190533	-0.3309	0.0323426	1.08228
Allantoate Allantoic acid	2.77787e-05	5.65014e-05	-1.02431	1.47638e-05	1.76425
Methylergonovine	6.57895e-05	4.32385e-05	0.605541	0.0183229	1.08037
Pterolactam	6.91316e-06	1.25489e-05	-0.860142	0.000826026	1.57034
Adynerin	0.00136205	0.00212448	-0.641324	0.0079782	1.3698
Glutathione disulfide	0.000318279	0.00140602	-2.14326	5.87514e-05	1.73528
1-Palmitoyl-sn-glycero-3-phosphocholine	2.19464e-05	1.1697e-05	0.907848	0.0154023	1.07436
Histidinyl-Glutamine	9.04848e-06	1.45301e-05	-0.683297	0.00455717	1.44223
Glutamyl-Lysine	7.69525e-06	1.42667e-05	-0.890606	0.00565497	1.23962
16b-Hydroxyestradiol	2.33027e-05	3.12614e-05	-0.423887	0.00510371	1.44043
Fexofenadine	1.24486e-05	1.70763e-05	-0.456021	0.0155728	1.2225
(+)-Citramailc acid	9.88014e-07	2.09119e-06	-1.08172	0.00221303	1.37733
N-Formylmethionine	0.00127722	0.00229866	-0.847791	0.00245405	1.43993
1-Palmitoylglycerol	6.88824e-06	9.4635e-06	-0.458238	0.0108671	1.18266
Manumycin A	1.12875e-05	2.0877e-05	-0.887189	0.00392449	1.29045
Xanthurenic acid	0.0106239	0.0184445	-0.795876	0.0350057	1.27959
Uridine 5'-diphospho-N-acetylglucosamine sodium salt	0.00114049	0.00357404	-1.6479	0.0326714	1.19228
L-Malic acid	0.000326513	0.000742367	-1.18499	0.0319575	1.15869
Uridine 5'-monophosphate	0.00219841	0.00470121	-1.09657	0.002309	1.61834
Inosine	0.0115676	0.00453901	1.34964	0.00049798	1.64532
Eicosapentaenoic acid	3.22486e-06	7.59707e-05	-4.55813	0.0226007	1.17723
trans-4,5-epoxy-2(E)-decenal	0.00107427	0.000305112	1.81595	0.00233492	1.51617
PE(20:4(8Z,11Z,14Z,17Z)/P-18:0)	0.00250327	0.00457822	-0.870969	0.00410555	1.36593
Prostaglandin F2a	0.00668051	0.00429942	0.635818	0.0466928	1.19199
PE(P-16:0e/0:0)	0.000788752	0.00174712	-1.14734	0.000361258	1.70995
Glutaconic acid	0	2.13289e-05	#DIV/0!	0.0160827	1.30311
LysoPC(P-16:0)	9.12385e-05	0.000228316	-1.32332	0.00312843	1.37942
MG(0:0/18:4(6Z,9Z,12Z,15Z)/0:0)	0	0.000874575	#DIV/0!	0.0498701	1.10733
Majonoside R2	1.84048e-05	0.000249396	-3.76028	0.012264	1.40752
LysoPC(22:2(13Z,16Z))	0.000602237	0.0013383	-1.152	0.00284324	1.45797
Resolvin E1	0.000144862	0.000384996	-1.41017	0.0241219	1.11153
4-Hydroxy-3-methoxy-2,10-bisaboladien-9-one	0.000150365	0.000572961	-1.92997	0.0143079	1.39964
Achillicin	0.000113282	0.000533866	-2.23656	0.0348246	1.16039
LysoPC(P-18:0)	0.000200363	0.000861296	-2.10389	0.000414956	1.75695
TetraHCA	7.45195e-05	0.000269335	-1.85371	0.0129784	1.33011
5-(8,11-Pentadecadienyl)-1,3-benzenediol	0	0.000256018	#DIV/0!	0.0416101	1.1854
LysoPE(0:0/22:4(7Z,10Z,13Z,16Z))	7.83294e-05	0.000297002	-1.92285	0.0018129	1.56417
Neocasomorphin (1-5)	0.00419412	0.00149177	1.49135	0.0117288	1.36172
2-Acetyl-1,5,6,7-tetrahydro-6-hydroxy-7-(hydroxymethyl)-4H-azepine-4-one	0.000482469	0.00106174	-1.13792	0.0306263	1.16576
Jasmine ketolactone	5.57263e-06	0.000293249	-5.71762	0.00305178	1.6221
2-Hydroxymyristoylcarnitine	0.000236246	0.000118603	0.994156	0.0234537	1.15197
L-isoleucyl-L-proline	0.000102851	0.000315918	-1.619	6.24763e-05	1.69433
3a,16b-Dihydroxyandrostenone	0.000434018	0.000889601	-1.0354	0.016373	1.14696
Cinereain	2.48365e-05	0.000336632	-3.76064	0.0130541	1.33758
5-(3E-Pentenyl)tetrahydro-2-oxo-3-furancarboxylic acid	0.000442857	0.000758208	-0.775751	0.0089983	1.28805
Epimetendiol	1.83507e-05	0.000250837	-3.77285	0.00237968	1.71163
4-Oxo-2-nonenal	3.80061e-05	0.000518844	-3.771	0.00112449	1.6614
Polyethylene, oxidized	3.85406e-06	4.32019e-05	-3.48664	0.015483	1.32584
FAD	5.7007e-05	0.000941563	-4.04584	0.0456077	1.14103
Guanosine monophosphate	0.00116546	0.00304234	-1.38429	0.0120532	1.41362
Prostaglandin J2	0	0.000175693	#DIV/0!	0.0277916	1.13327
MG(0:0/18:3(6Z,9Z,12Z)/0:0)	0.000121129	0.000678099	-2.48495	0.00890815	1.32456
Alprenolol	0.000225195	0.000651164	-1.53184	0.000132935	1.81064
24,25,26,27-Tetranor-23-oxo-hydroxyvitamin D3	0	0.00109253	#DIV/0!	0.0301602	1.26117
Frovatriptan	1.26497e-05	0.000164812	-3.70364	0.00358718	1.56725
9(10)-EpODE	3.5581e-05	0.000113768	-1.67691	0.0394396	1.0668
Peperinic acid	0.000417514	0.00100333	-1.2649	0.0010583	1.61141
7,13-Eperudien-15-oic acid	6.74714e-05	0.000459031	-2.76625	0.048102	1.13212
Cyclandelate	3.64247e-06	0.000111947	-4.94176	0.00406065	1.49132
1,25-Dihydroxyvitamin D3-26,23-lactone	6.5616e-05	0.000262164	-1.99835	0.0100522	1.33194
1-Acetoxy-2-hydroxy-16-heptadecen-4-one	1.26552e-05	0.000274122	-4.43702	0.00170238	1.61609
Ganoderic acid Mf	3.49573e-05	0.000175726	-2.32967	0.0351731	1.07511
Lactosylceramide (d18:1/12:0)	0.00583744	0.000481374	3.6001	2.7967e-09	2.14124
PC(16:0/20:4(5Z,8Z,11Z,14Z))	0	0.000154406	#DIV/0!	0.0145959	1.33551
LysoPC(18:4(6Z,9Z,12Z,15Z))	0	0.000264045	#DIV/0!	0.00298491	1.65387
Ganoderic acid V	2.6786e-05	0.000147804	-2.46413	0.0463214	1.11919
gamma-Chaconine	0.00123645	0.00191392	-0.63033	0.0293921	1.15333
Cyanidin 3-(2G-xylosylrutinoside)	4.51111e-06	0.000173873	-5.26841	0.00127838	1.67711
Leukotriene C5	0.00411725	0.00176541	1.22168	0.00814899	1.34314
PC(16:0/20:3(5Z,8Z,11Z))	4.72875e-06	0.00010189	-4.42942	0.030048	1.18101
DG(18:2n6/0:0/22:5n6)	0.000102933	0.00121114	-3.55658	0.00244984	1.69125
27-Norcholestanehexol	1.5837e-05	6.49459e-05	-2.03594	0.0269132	1.15442
6-(alpha-D-Glucosaminyl)-1D-myo-inositol	4.52906e-06	0.000117168	-4.69322	0.0155461	1.2381
Sterebin E	0.000255753	1.16026e-05	4.46224	0.0158208	1.34141
Hydroxydestruxin B	0	5.83053e-05	#DIV/0!	0.044981	1.0602
[8]-Paradol	6.01695e-06	0.00104116	-7.43495	0.0183003	1.33213
11-peroxy-5Z,8Z,12E,14Z-eicosatetraenoate	0.00605597	0.00127983	2.24241	0.000740231	1.76187
Glyceryl 5-hydroxydecanoate	1.00669e-05	0.000169836	-4.07646	0.00113939	1.64255
16beta-16-Hydroxy-3-oxo-1,12-oleanadien-28-oic acid	1.28083e-05	0.0001096	-3.0971	0.045048	1.07271
Pristanoylglycine	0.000269758	0.000954741	-1.82345	0.0201654	1.37163
(3beta,5alpha,9alpha,14alpha,22E,24R)-3,5,9,14-Tetrahydroxyergosta-7,22-dien-6-one	0.00613816	0.0036686	0.742577	0.00449119	1.54296
Eremopetasidione	1.20178e-05	7.98429e-05	-2.73199	0.014135	1.27988
L-Furosine	0.00162305	0.00349095	-1.10491	0.000403146	1.63186
Cabergoline	0.00236141	0.00460865	-0.964696	0.000501014	1.73433
Oxidized glutathione	0.000655639	0.00614025	-3.22732	0.00243676	1.65944
3-Ethyl-2-(1-pyrrolidinyl)-2-cyclopenten-1-one	0	3.74145e-05	#DIV/0!	0.047786	1.03312
Lacto-N-triaose	0.00187372	0.00421558	-1.16982	0.00423263	1.49561
(2E,4E)-2,7-Dimethyl-2,4-octadienedioic acid	8.32245e-05	0.000289277	-1.79737	0.00149931	1.49407
DG(18:1(11Z)/22:5(4Z,7Z,10Z,13Z,16Z)/0:0)	6.27485e-05	0.000269822	-2.10435	0.0391432	1.1648
PC(20:5(5Z,8Z,11Z,14Z,17Z)/P-18:1(11Z))	0.00359244	0.000702806	2.35376	2.89391e-05	1.89026
Moricizine	1.35907e-05	9.60414e-05	-2.82103	0.00651072	1.44661
PS(18:0/20:4(8Z,11Z,14Z,17Z))	5.28871e-06	0.000322485	-5.93017	0.0147484	1.41598
Cervonyl carnitine	0.000217271	0.000866651	-1.99595	0.00614284	1.35571
Paroxetine	0.000833833	0.000269716	1.62832	4.40375e-06	1.95348
PC(14:0/22:5(7Z,10Z,13Z,16Z,19Z))	0.0552051	0.0122735	2.16925	1.20879e-05	1.94715
1-hexadecyl-glycero-3-phosphate	0.0003845	1.1393e-05	5.07676	0.000547041	1.76357
PE(20:4(5Z,8Z,11Z,14Z)/P-18:1(11Z))	4.36884e-06	0.000391595	-6.48597	0.0131255	1.35997
4-Hydroxy-(3',4'-dihydroxyphenyl)-valeric acid	6.94105e-05	0.000153953	-1.14927	0.00787251	1.22123
[10]-Shogaol	5.28916e-05	0.000218355	-2.04557	0.00385914	1.46386
Tetronasin	9.04442e-05	0.000562661	-2.63717	0.000569403	1.65549
PE(22:6(4Z,7Z,10Z,13Z,16Z,19Z)/P-18:1(11Z))	0.000279422	0.00144783	-2.37337	0.00131386	1.62593
6-Isothiocyanato-1-hexene	1.16489e-05	0.000157831	-3.76012	0.028615	1.20041
PE(20:3(5Z,8Z,11Z)/22:6(4Z,7Z,10Z,13Z,16Z,19Z))	4.58789e-06	0.000813382	-7.46996	0.0098827	1.55995
(R)-Apiumetin	0.00150939	0.000719898	1.0681	0.000688779	1.56983
Epirubicin	1.15781e-05	0.00044369	-5.26008	0.0129232	1.40114
Tetracosahexaenoic acid	0.0167798	0.00856416	0.97034	0.00310178	1.60776
LysoPC(22:5(4Z,7Z,10Z,13Z,16Z))	9.8682e-05	0.000642198	-2.70216	0.000461873	1.81193
PE(20:3(5Z,8Z,11Z)/18:0)	0.00029278	0.00145143	-2.30959	0.00229866	1.59354
35S-Methylokadaic acid 7-hexadecanoate	0	8.29775e-05	#DIV/0!	0.0103765	1.38605
2-hydroxymexiletine	1.16906e-05	7.77539e-05	-2.73357	0.0413039	1.0841
Jasmonic acid	5.38284e-05	0.000283088	-2.39481	0.000110358	1.7554
PE(15:0/22:5(4Z,7Z,10Z,13Z,16Z))	8.09797e-05	0.000861409	-3.41107	0.011461	1.21557
2-Oleoylglycerophosphocholine	0.000231446	0.000962286	-2.05579	0.00973087	1.37353
Antibiotic X 14889C	0	3.62075e-05	#DIV/0!	0.042071	1.07287
Gamma-Aminobutyryl-lysine	0	2.74302e-05	#DIV/0!	0.0499579	1.135
12-Hydroxy-12-octadecanoylcarnitine	0.00202194	0.00382061	-0.91806	0.00334667	1.5828
(24E)-3alpha-Acetoxy-15alpha,22S-dihydroxylanosta-7,9(11),24-trien-26-oic acid	0.000167921	0.000348659	-1.05403	0.00133238	1.61726
PE(20:3(5Z,8Z,11Z)/P-18:1(11Z))	0.000277005	0.000977174	-1.8187	0.00683933	1.42332
Alpha-Linolenoyl ethanolamide	0.00069041	0.00218212	-1.6602	0.0133387	1.33374
LysoPE(0:0/20:0)	0.000286459	0.00063199	-1.14157	0.0264604	1.27358
Alanyl-Glutamate	3.20762e-05	0.00017725	-2.46621	0.0187229	1.30293
Chondroitin	1.92737e-05	0.000187923	-3.28544	0.00032781	1.77603
4-Hydroxyvalsartan	0.000372553	0	#DIV/0!	0.0142291	1.36208
Guavin B	0.00575246	0.0140867	-1.29208	0.00236003	1.61678
Acetyl citrate	0.000476049	1.14387e-05	5.37911	0.0134259	1.36233
PS(16:0/18:2(9Z,12Z))	0.000866011	0.00205476	-1.24651	0.00441608	1.43994
Ganglioside GA2 (d18:1/16:0)	8.18832e-05	0.000547216	-2.74047	0.0176843	1.26045
Perillyl aldehyde	1.52177e-05	7.47212e-05	-2.29577	0.0441476	1.06608
Cholesterol sulfate	0	0.000113764	#DIV/0!	0.00908557	1.52405
PE(22:5(7Z,10Z,13Z,16Z,19Z)/P-18:0)	5.63922e-05	0.000339401	-2.58942	0.0259144	1.09688
Oleic acid	0	9.75059e-05	#DIV/0!	0.00588811	1.44311
Taurocholic acid 3-sulfate	7.19811e-05	0.000597629	-3.05356	0.000397588	1.83032
Tricholomic acid	2.5268e-05	0.000192439	-2.92902	0.00456574	1.58747
Ganoderic acid S	0	0.000182438	#DIV/0!	0.0275738	1.24709
8-Hydroxyluteolin 8-sulfate	2.51859e-05	0.000270904	-3.42709	0.00369655	1.56131
Adenosine thiamine diphosphate	9.83905e-06	0.000509802	-5.69527	0.0173539	1.31002
LysoPE(0:0/24:6(6Z,9Z,12Z,15Z,18Z,21Z))	2.33754e-06	7.38581e-05	-4.9817	0.0245907	1.22904
Trioxsalen	6.59211e-05	0.0001465	-1.15209	0.0340579	1.09801
Ginsenoyne J	0.000286866	0.000565493	-0.979134	0.0169107	1.23799
2-(acetylamino)-1,5-anhydro-2-deoxy-3-O-b-D-galactopyranosyl-D-arabino-Hex-1-enitol	0	4.34252e-05	#DIV/0!	0.0142394	1.40038
Mucronine D	1.19343e-05	0.000102817	-3.10689	0.0207357	1.33271
Perillic acid	1.02283e-05	0.000159417	-3.96216	0.0442872	1.02972
7-Formyldehydrothalicsimidine	0.00148508	0.00115288	0.365292	0.0317727	1.09632
Farnesiferol B	1.33382e-05	0.00012842	-3.26723	0.0175938	1.20666
Fumonisin AK1	0.000109834	0.00049135	-2.16142	0.000387447	1.85536
(ent-6alpha,7alpha,12alpha)-6,7,12-Trihydroxy-16-kauren-19-oic acid	0.000301101	0.000703274	-1.22384	0.001335	1.54491
Taurolithocholic acid 3-sulfate	4.04831e-06	3.61676e-05	-3.15931	0.0369659	1.12149
Natamycin	0.000137271	0.000387565	-1.49741	0.00304549	1.4627
IDP	0.000212645	0.000940018	-2.14424	0.00489729	1.60621
L-Sorbose	3.36932e-05	0.000152434	-2.17766	0.0278269	1.25621
41-O-demethylrapamycin	4.23905e-06	0.000239134	-5.81794	0.00740692	1.39091
()-(E)-13-Hydroxy-10-oxo-11-octadecenoic acid	0.00614554	0.00864869	-0.492941	0.00916271	1.2395
2,2,6,6-Tetramethyl-4-piperidinone	0	0.000113347	#DIV/0!	0.0271889	1.17623
PE(22:5(4Z,7Z,10Z,13Z,16Z)/P-18:1(11Z))	0.000184306	0.000955148	-2.37362	0.00899139	1.30523
Olmesartan	0.000129024	0.00033957	-1.39606	0.00808034	1.24789
LysoPC(22:1(13Z))	0.000238859	0.000557193	-1.22202	0.00460953	1.42729
Homoanserine	1.59497e-05	0.000102573	-2.68505	0.0478484	1.13382
Permetin A	8.08393e-06	0.000196347	-4.60221	0.0255788	1.20265
PC(22:5(4Z,7Z,10Z,13Z,16Z)/22:5(4Z,7Z,10Z,13Z,16Z))	5.22396e-05	0.000323602	-2.631	0.0189394	1.30825
PG(18:0/22:5(4Z,7Z,10Z,13Z,16Z))	0	0.000108065	#DIV/0!	0.0478797	1.00285
Cucurbitacin B	0	6.93588e-05	#DIV/0!	0.0247148	1.03551
Hydroxyhomodestruxin B	8.68301e-05	0.000638908	-2.87934	0.000470053	1.71113
1-Hydroxy-3,7-dimethoxyxanthone	2.43068e-05	0.000141087	-2.53715	0.00569817	1.48936
Glutathione	0	3.47229e-05	#DIV/0!	0.0195294	1.33707
Hyaluronic acid	0	8.83914e-05	#DIV/0!	0.0237644	1.28231
Anhydroamarouciaxanthin B	1.14452e-05	0.000157042	-3.77833	0.00973265	1.37438
Indinavir	0.000348035	0.000840785	-1.2725	1.29863e-05	1.81682
Oleoylcarnitine	0.00150348	0.000751142	1.00115	0.00273569	1.51985
Esculentic acid (Phytolacca)	3.20107e-05	0.000192211	-2.58607	0.0263685	1.09303
Ginsenoside Rb1	0	0.000170431	#DIV/0!	0.0366348	1.13024
3-Methyl-3-butenyl apiosyl-(1->6)-glucoside	4.69139e-05	0.000115124	-1.2951	0.0167187	1.28474
LysoPE(0:0/16:1(9Z))	0.0289172	0.01762	0.714714	0.00435068	1.49191
Spirolide B	0.00473531	0.00232689	1.02506	0.00511336	1.41001
D-Linalool 3-(6''-malonylglucoside)	0	8.08658e-05	#DIV/0!	0.0100062	1.35415
Brassinolide	0.000750833	0.00186795	-1.31489	0.000336073	1.71073
Ganodermic acid TQ	0.000412188	0.00167372	-2.02168	6.53169e-05	1.89568
10-Hydroxy-8-nor-2-fenchanone glucoside	0.00167214	0.000129994	3.68519	0.00286641	1.62589
PC(16:0/22:6(4Z,7Z,10Z,13Z,16Z,19Z))	0.000633338	5.87335e-05	3.43072	0.000188565	1.74938
Prostaglandin F3a	0.0325275	0.0216483	0.587406	0.00431324	1.54592
PA(18:0/18:2(9Z,12Z))	3.1245e-05	0.00149571	-5.58105	0.00650151	1.54368
Zingerone glucoside	0.00135344	0.0005516	1.29494	0.045363	1.02316
Vignatic acid A	3.91448e-05	0.000134204	-1.77754	0.0230236	1.1703
PC(18:0/22:5(4Z,7Z,10Z,13Z,16Z))	2.38551e-05	0.000338752	-3.82786	0.0032773	1.61344
Rothindin	0	8.7812e-05	#DIV/0!	0.0248932	1.26773
Retinyl beta-glucuronide	0.000232288	0.000608867	-1.39021	0.00613816	1.38411
Benzyl hexanoate	2.55551e-05	0.000259323	-3.34307	0.0175725	1.29651
9-Acetoxyfukinanolide	6.40491e-05	0.000272842	-2.09082	0.00147665	1.61485
Neoacrimarine B	7.75542e-06	0.000112155	-3.85414	0.0278195	1.26485
PE(18:1(11Z)/22:5(4Z,7Z,10Z,13Z,16Z))	1.66672e-05	0.000334816	-4.32829	0.00191536	1.60052
13E-Tetranor-16-oxo-16-CoA-LTE4	5.80291e-06	0.000439092	-6.2416	0.0415783	1.12234
Gluconapin	0	0.000154136	#DIV/0!	0.0357193	1.15226
UDP-N-acetyl-alpha-D-glucosamine(2-)	9.83346e-05	0.000516733	-2.39365	0.0142755	1.32756
Taurocholic acid	4.77252e-05	0.00015519	-1.70121	0.0481197	1.15985
2-Deoxy-L-ribono-1,4-lactone	0	8.45683e-05	#DIV/0!	0.0320387	1.26681
Neoacrimarine G	5.94327e-05	0.000249991	-2.07255	0.000647834	1.7297
Chondrillasterol 3-[glucosyl-(1->4)-glucoside]	7.51962e-05	0.000401616	-2.41709	0.00322465	1.55176
Adhumulinic acid	9.30185e-05	0.000290903	-1.64495	0.000707186	1.65538
PC(18:1(9Z)e/2:0)	1.20116e-05	0.000135683	-3.49774	0.00976895	1.44386
PE(DiMe(11,5)/MonoMe(11,3))	4.98642e-05	0.000482535	-3.27456	0.00249306	1.53741
Mauritine A	0	8.34114e-05	#DIV/0!	0.00276033	1.58963
2,3-Dehydrosilybin	0	0.000117877	#DIV/0!	0.0470377	1.1805
5'-Hydroxypiroxicam	8.986e-06	0.000581077	-6.01491	0.0369604	1.21059
Angiotensin IV	6.13135e-07	6.06076e-05	-6.62715	0.0234425	1.27146
Monotropein	2.4618e-05	0.000109958	-2.15916	0.00502314	1.48392
Desacetyl-nitazoxanide	3.316e-06	8.33217e-05	-4.65118	0.0492425	1.14542
2'-Apo-beta-carotenal	6.35779e-05	0.000454879	-2.83888	0.000822715	1.78664
PE(18:4(6Z,9Z,12Z,15Z)/22:0)	0.000501356	0.00143456	-1.5167	0.00288387	1.37304
PC(P-18:1(11Z)/20:4(5Z,8Z,11Z,14Z))	0.000972013	0.00223825	-1.20333	0.0287308	1.04473
Schidigerasaponin C2	0	0.000773007	#DIV/0!	0.0445859	1.16192
Taurochenodeoxycholate-3-sulfate	0.000182816	0.000418901	-1.19622	0.0201282	1.32574
PC(18:1(11Z)/16:0)	0	6.19459e-05	#DIV/0!	0.0356674	1.11984
LysoPC(20:3(5Z,8Z,11Z))	5.3864e-06	0.000148724	-4.78717	0.0103477	1.4704
2-oxoglutarate(2-)	0	2.52265e-05	#DIV/0!	0.0391842	1.17263
Cefaclor	5.13371e-05	0.000186122	-1.85818	0.0162334	1.35489
Flavidulol C	6.8804e-06	0.000106653	-3.95429	0.0378419	1.10452
N-[4'-hydroxy-(E)-cinnamoyl]-L-aspartic acid	9.18833e-05	0.000257865	-1.48874	0.0115958	1.40186
Sambutoxin	0.081935	0.070116	0.224736	0.0047619	1.41877
Amygdalin	3.53038e-06	0.000143459	-5.34467	0.00386844	1.57486
LysoPE(0:0/18:1(11Z))	6.24667e-05	0.000159403	-1.35152	0.0295715	1.13362
Thioguanosine 5'-diphosphate	3.00168e-06	8.3695e-05	-4.8013	0.0121188	1.43039
5,9,11-trihydroxyprosta-6E,14Z-dien-1-oate	4.43227e-06	5.79153e-05	-3.70783	0.0112436	1.35152
Glabric acid	1.13241e-05	0.000162639	-3.8442	0.0314317	1.19517
Desacetyllaurenobiolide	3.87563e-06	3.95445e-05	-3.35098	0.018305	1.32
Gancaonin C	4.37159e-06	5.49793e-05	-3.65266	0.0470538	1.05247
Nona-2,4,6-trienal	5.19563e-06	0.00027209	-5.71064	0.00938635	1.56313
15-Deoxy-delta-12,14-PGJ2	0.00022807	0.00101065	-2.14773	0.000467352	1.67066
1-Stearoyl-2-hydroxy-sn-glycero-3-phosphocholine	0.00411278	0.00575798	-0.48545	0.0332078	1.06207
Estradiol Cypionate	5.92709e-05	0	#DIV/0!	0.0126806	1.35599
Glycocholic acid	0	5.15719e-05	#DIV/0!	0.0366599	1.01515
Glutathione disulfide	0.000224366	0.00392023	-4.12701	0.0329924	1.20262
delta-12-PGJ2	0.00711974	0.014288	-1.00491	0.00154629	1.52012
Oxethazaine	2.41466e-06	5.35561e-05	-4.47116	0.034855	1.23899
Arachidonoyl dopamine	0.025373	0.0210636	0.268542	0.00130964	1.5746
